# Supplementary material for: Inhibiting tumor cell-intrinsic UBA6 by inosine augments tumor immunogenicity
Source: Research Square preprint supplement (doi:10.21203/rs.3.rs-620390/v1), 2021-07-12
Supplement: Supplementary file 1 [file 73f5d40b26e54cacb77f51b7.xlsx]

## Sheet: Supplementary Table 1
	Supplementary Table 1. Identification of 244 plasma metabolites and their relative quantification in B16-bearing mice with IgG2 (Ctrl) or combination of PD1 mAb and CTLA4 mAb (ICB) treatment. Log2 fold change (FC) was calculated as log2 (ICB/Ctrl).
	Biochemical name	log2 FC(ICB/Ctrl)	p-value
	Inosine	-5.31339	0.0417
	(-)-Limonene	-4.5126	0.0366
	Guanosine	-3.76377	0.0167
	Hypoxanthine	-3.06555	0.0116
	Xanthine	-2.25702	0.0013
	Diazepam	-1.93252	0.0448
	2'-Deoxyinosine	-1.76553	0.0162
	Xanthosine	-1.69614	0.0595
	D-Ribose5-phophate	-1.34751	0.043
	D-Leucine	-0.840664	0.0482
	Swainsonine	-0.818393	0.4965
	SM(d18:1/16:0)	-0.807355	0.0901
	2'-Deoxyguanosine	-0.783716	0.4149
	Cytidine	-0.768442	0.011
	Daidzein	-0.742842	0.5116
	2,4-Dihydroxybenzoic Acid	-0.730283	0.2614
	Methyl--D-galactopyranoside	-0.689335	0.3911
	N-Acetyl-L-leucine	-0.650706	0.5658
	Erucic acid	-0.647577	0.3445
	2-Hydroxyisocaproic Acid	-0.630902	0.1432
	D-Glucose 6-phosphate	-0.601961	0.2921
	1-Palmitoyl-Sn-Glycero-3-Phosphocholine	-0.594242	0.5191
	N-Acetylleucine	-0.584963	0.5353
	N-Acetyl-L-tyrosine	-0.541461	0.7428
	Hexanoyl glycine	-0.53621	0.5766
	Hydroxyisobutyrate	-0.535514	0.4569
	5-Hpete	-0.534851	0.28
	3-Methylbenzyl alcolhol	-0.531851	0.3152
	Prednisone 21-acetate	-0.528874	0.3711
	Norvaline	-0.51821	0.0953
	L-Allo-Isoleucine	-0.513674	0.1791
	Myristic acid	-0.51338	0.2797
	L-Homocystine	-0.508412	0.3923
	Pentadecanoic acid	-0.501864	0.2532
	Cytosine	-0.464404	0.054
	Serotonin	-0.462849	0.4575
	Piperidine	-0.460214	0.3067
	Albendazole sulfoxide	-0.450257	0.2148
	Mesalamine	-0.434368	0.688
	p-Tolualdehyde	-0.424805	0.2308
	Farnesylacetone	-0.422233	0.2554
	1-Amlnocydohexanecarboxylic Acid	-0.419888	0.1756
	5-Pregnane-3,20-dione	-0.419855	0.296
	7z,10z,13z-Hexadecatrienoic Acid	-0.408199	0.315
	3-propyl acrolein	-0.408031	0.2764
	All-cis-4,7,10,13,16-docosapentaenoic acid	-0.396604	0.3039
	L-Isoleucine	-0.396575	0.1461
	3-Indolepropionic acid	-0.395756	0.5077
	Dl-Norvaline	-0.387806	0.2418
	Indoline	-0.382494	0.4365
	6-Gingerol	-0.381419	0.5499
	Hexadecan-1-ol	-0.381307	0.3334
	D-Phenylalanine	-0.3813	0.4305
	Glycerophosphoric acid	-0.375433	0.1796
	L(+)-Ornithine	-0.35599	0.1257
	Myristoleic acid	-0.351911	0.6648
	Linoleic acid	-0.342687	0.3141
	3-Hydroxy-2-Methylbutanoic acid	-0.342131	0.4596
	Cinnamic acid	-0.340875	0.4844
	trans-Cinnamic acid	-0.337805	0.482
	2,4,6-Trichlorophenol	-0.332792	0.1023
	L-Histidine	-0.330247	0.086
	beta-Hydroxypyruvic acid	-0.31034	0.2335
	Oxoglutaric acid	-0.309928	0.378
	Arachidonic acid	-0.30242	0.0543
	10-Hydroxydecanoic Acid	-0.298677	0.3706
	Nicotinamide	-0.298224	0.3847
	3-Aminopentanedioic acid	-0.296314	0.4712
	Phosphoric acid	-0.292219	0.1562
	Ethyl caprate	-0.287877	0.4103
	21-Deoxycortisol	-0.283533	0.4256
	Taurochenodesoxycholic acid	-0.279026	0.6078
	15-Oxoete	-0.274931	0.6412
	3-Phenylpropionic acid	-0.273288	0.4765
	1-Methylguanosine	-0.272253	0.2812
	Citric acid	-0.270871	0.1434
	D-Histidine	-0.263913	0.2919
	trans-Vaccenic acid	-0.26366	0.4548
	3-Hydroxybutyrate	-0.244636	0.5387
	3-Carboxybenzadehyde	-0.241578	0.8041
	L-(-)-3-Phenyllactic acid	-0.24087	0.6764
	Cis-10-Nonadecenoic acid	-0.240476	0.5152
	Docosahexaenoic acid	-0.23173	0.3769
	HARMOL	-0.231006	0.4676
	Stearamide	-0.223506	0.4914
	Vedaprofen	-0.171457	0.596
	Glu-Leu	-0.16323	0.5286
	Dl-2-Aminooctanoic acid	-0.160465	0.6154
	Succinic anhydride	-0.156874	0.388
	L-Phenylalanine	-0.149378	0.4655
	7-(2-Hydroxyethyl)theophyline	-0.141617	0.5111
	Cis-11,14-Eicosadienoic acid	-0.136846	0.6215
	Capric acid	-0.132064	0.1414
	Gluconic acid	-0.130521	0.4833
	Coumarin	-0.125531	0.7019
	2-Propylpentanoic acid	-0.113949	0.2026
	4-Hydroxyquinoline	-0.113009	0.8517
	Urocanic acid	-0.1127	0.5396
	2, 4-Diacetylphloroglucinol	-0.109765	0.4261
	Arginine	-0.107465	0.747
	4-Oxopentanoate	-0.10262	0.5495
	Mesterolone	-0.10188	0.6106
	Nicotyrine	-0.100111	0.7968
	L-Tryptophan	-0.0962506	0.8067
	Malonate	-0.0931094	0.8569
	Lysine	-0.090891	0.7138
	Cholesteryl laurate	-0.0906094	0.2701
	Glutamine	-0.0888381	0.6907
	Purine	-0.0833272	0.75
	Acrylic acid	-0.0801703	0.726
	D-Pipecolinic acid	-0.0656572	0.7414
	2,6-Dichlorobenzoic Acid	-0.0639273	0.6964
	L-Norvaline	-0.0621704	0.8742
	2'-Deoxyuridine	-0.0528213	0.8463
	D(+)-Tryptophan	-0.0481684	0.8914
	Scopoletin	-0.0477757	0.3324
	Mesaconic acid	-0.0451131	0.8475
	1,7-Dimethylxanthine	-0.0413427	0.8599
	2-Furoic acid	-0.037153	0.6468
	5-Aminosalicylic Acid	-0.0370179	0.8435
	D-Methionine	-0.03591	0.901
	4-Hydroxymethylimidazole	-0.0247325	0.8754
	p-Anisidine	-0.0191168	0.7625
	Erucamide	-0.0170332	0.9807
	Bis(2-ethylhexyl)-phthalate	-0.014797	0.9562
	Butylparaben	-0.0146874	0.7987
	Nerol	-0.0146256	0.7605
	Pelargonic acid	-0.0112412	0.838
	4-Nitrophenol	-0.00162986	0.9664
	4-Hydroxyindole	0	0.9663
	N-Octylamine	0.00569861	0.8978
	Thiabendazole	0.0063515	0.4704
	D-Norvaline	0.00764955	0.8337
	Methyl jasmonate	0.00822051	0.8001
	2-Aminopropanol	0.0114956	0.9454
	Prostaglandin A1	0.016553	0.9694
	L-Methionine	0.0207181	0.9255
	Dl-Dihydrozeatin	0.0285333	0.9028
	3-Methylcrotonyl glycine	0.0296793	0.9543
	Mono-ethylhexylphthalate	0.0339973	0.4952
	Hippuric acid	0.034661	0.4727
	Abietic acid	0.0413676	0.933
	5-Formylsalicylic acid	0.0424602	0.4775
	Methylmalonate	0.0453295	0.8511
	2,4-Epibrassinolide	0.0469975	0.7991
	(-)Shikimic acid	0.0517188	0.9452
	Guggulsterone	0.0522528	0.473
	Choline	0.0582422	0.7851
	Linolenic acid	0.06311	0.9182
	8(R)-Hydroxy-(5Z,9E,11Z,14Z)-eicosatetraenoic acid	0.0721753	0.8865
	Glycerol 1-hexadecanoate	0.0740006	0.709
	Isoleucine	0.0824622	0.7188
	1,6-Anhydro--D-Glucopyranose	0.0832927	0.7199
	Succinic acid semialdehyde	0.088197	0.3704
	Histamine	0.0898314	0.1941
	Mandelonitrile	0.11757	0.7781
	Salicylic acid	0.120813	0.735
	trans-P-Coumaric acid	0.135706	0.7608
	D-Galactose	0.135953	0.5237
	3-Amino-3-(4-hydroxyphenyl)-propionic acid	0.139667	0.7344
	Dl-Norleucine	0.148694	0.383
	Uridine	0.152739	0.7678
	N-Isovaleroylglycine	0.160465	0.8645
	Prostaglandin B2	0.160465	0.7521
	Sphingosine-1-phosphate	0.161049	0.4222
	Dl-Indole-3-lactic acid	0.161839	0.8553
	Creatinine	0.162587	0.6837
	N-Acetyl-L-histidine	0.166424	0.0225
	L-Glutamine	0.173637	0.4884
	Citrulline	0.183678	0.4361
	(R)-3-methyl-2-oxo-Pentanoic acid	0.186227	0.6369
	Dl-Glutamic acid	0.18955	0.4758
	D(-)-Arginine	0.200013	0.4595
	Deoxycholic acid	0.201101	0.7051
	L-Tyrosine	0.212161	0.6559
	Propionyl-L-carnitine	0.214927	0.4401
	Biliverdin	0.217591	0.518
	2-Phenylacetamide	0.220934	0.6427
	Taurine	0.222004	0.5559
	Indoxyl sulfate	0.223402	0.6231
	L-Carnitine	0.237864	0.5753
	Threonate	0.241515	0.4092
	4-Pyridoxic acid	0.246161	0.0597
	Norethisterone	0.246982	0.646
	Spongouridine	0.253527	0.5843
	N-Acetyl-D-tryptophan	0.25464	0.4067
	Phenylacetylglycine	0.263034	0.6983
	1-Methylhistidine	0.26693	0.6002
	L-Arginine	0.267152	0.4794
	5-Methoxyindole-3-acetic acid	0.270479	0.5737
	(R)-(+)-Lactamide	0.278779	0.2447
	10-Undecenoic Acid	0.278859	0.5161
	2-oxohexanoic acid	0.286243	0.4491
	9-Oxoode	0.29134	0.6811
	N-Phenylacetylglycine	0.294417	0.538
	Creatine	0.300561	0.2235
	Palmitic acid	0.312665	0.3514
	5,6-Dihydro-2h-pyran-2-one	0.31271	0.2284
	3-Methyl-L-histidine	0.314974	0.1842
	Dl-Proline	0.315818	0.3077
	Acetylcholine	0.321928	0.5111
	Malic acid	0.32263	0.3107
	Hydrocortisone	0.325241	0.6881
	5-Deoxy-5'-methylthioadenosine	0.355095	0.2852
	Alendronic acid	0.378704	0.0839
	3-Methyluridine	0.405992	0.4216
	Pro-Leu	0.412902	0.2128
	Taurocholic acid	0.420751	0.5383
	1-Linoleoyl-Rac-Glycerol	0.430144	0.5597
	Riboflavin B2	0.431716	0.0865
	7-Ketodeoxycholic acid	0.452018	0.7134
	L-Kynurenine	0.453493	0.2833
	6-Thioxanthine	0.455071	0.1603
	Semicarbazide	0.477987	0.2115
	METHACHOLINE	0.485427	0.3848
	alpha-Pinene	0.497046	0.3698
	Dl-P-Hydroxyphenyl lactic acid	0.518387	0.5915
	Malonic acid	0.52502	0.2239
	Ethopabate	0.547285	0.3116
	D-(+)-Malic acid	0.555647	0.1115
	Fumarate	0.58173	0.093
	1H-Indole-3-Acetic Acid	0.600322	0.2563
	Opthalmic acid	0.601173	0.2324
	D-Pantothenic acid	0.622293	0.1826
	Allantoin	0.643358	0.4452
	N,N,N-trimethyllysine	0.665736	0.2556
	Dimethyl phosphate	0.689998	0.2488
	Cortexolone	0.710621	0.1607
	rac-Glycerol 3-phosphoate	0.733547	0.0663
	L-Cysteine-glutathione gisulfide	0.799557	0.0996
	Cholic acid	0.898247	0.398
	Dl-Dihydrosphingosine	0.912052	0.0088
	Eicosapentaenoic acid	0.94926	0.1923
	N6-Succinyl adenosine	0.966053	0.4014
	2-Nitroaniline	0.998324	0.2193
	Uric acid	1.01645	0.0533
	Nalidixic acid	1.12221	0.079
	Tetrahydroaldosterone	1.18772	0.4841
	m-Salicylic acid	1.25873	0.1562
	Tetrahydrocorticosterone	1.38833	0.2656
	Adenosine 5'-monophosphate	1.55102	0.3214
	Allose	1.55522	0.0135
	Cyclohexene	1.61891	0.0601
	1-Methylxanthine	1.75256	0.1929

## Sheet: Supplementary Table 2
Supplementary Table 2. Table summarizing the hazard ratios (HR) of High/low each serum metabolite (defined by median) as a predictor in relation to CheckMate 025 RCC patient overall survival using a Cox proportional hazards model.
Metabolites	P value	HR (High/Low)
C34:3 PE plasmalogen	< 0.0001	0.595593
NMMA	< 0.0001	0.597729
C38:6 PE plasmalogen	< 0.0001	0.613874
betaine	< 0.0001	0.618812
histidine	< 0.0001	0.619963
N-carbamoyl-beta-alanine	< 0.0001	1.67029
C16:0 ceramide (d18:1)	< 0.0001	1.70242
N1-acetylspermidine	< 0.0001	1.71733
DMGV	< 0.0001	1.74611
diacetylspermine	< 0.0001	2.00441
C36:5 PE plasmalogen	0.0002	0.62422
C36:3 PE plasmalogen	0.0002	0.626174
butyrobetaine	0.0002	0.653595
C36:2 PS plasmalogen	0.0002	1.59134
Inosine	0.0003	0.640615
C38:4 PE	0.0003	1.57629
C16:1 LPC plasmalogen	0.0004	0.641849
N4-acetylcytidine	0.0004	1.54895
C34:2 PE plasmalogen	0.0005	0.648088
citrulline	0.0005	0.651466
C40:7 PE plasmalogen	0.0006	0.651466
pseudouridine	0.0009	1.5124
glutamine	0.0013	0.673401
1-methyladenosine	0.0017	1.47145
N-acetylputrescine	0.0017	1.47254
C18:1 LPC plasmalogen_B	0.0018	0.677507
C20:5 LPC	0.0019	0.679348
8-hydroxy-deoxyguanosine	0.0021	0.683995
C38:7 PE plasmalogen	0.0023	0.683527
C18:1 LPC	0.0032	0.692042
3-methylxanthine	0.0036	0.71736
C18:0 SM	0.0036	1.43493
C18:3 LPC	0.0038	0.69735
C18:0 LPC	0.005	0.705219
2-aminooctanoate	0.0051	0.69541
threonine	0.0089	0.723066
acetaminophen	0.0106	1.37287
C4-OH carnitine	0.0111	1.37118
choline	0.0124	0.734754
C16:1 LPC	0.0154	0.739645
acetyl-galactosamine	0.017	1.34156
C24:1 ceramide (d18:1)	0.018	1.34048
C36:4 PE	0.0181	1.33994
N-alpha-acetylarginine	0.0207	0.75188
tryptophan	0.0213	0.751315
C38:6 PC plasmalogen	0.0229	0.75358
C20:0 SM	0.0254	0.757002
C36:2 PC	0.0255	0.757576
methionine	0.0264	0.760456
glutamate	0.0285	1.30959
thiamine	0.0289	0.762777
C14:0 LPC	0.0313	0.765111
4-acetamidobutanoate	0.0366	0.772798
imidazole propionate	0.0415	1.28932
C38:7 PC plasmalogen	0.0489	0.782473
C20:0 LPE	0.0496	0.783699
lysine	0.0547	0.789266
5-hydroxytryptophan	0.0548	0.787402
C10 carnitine	0.0548	1.26727
C18:1 SM	0.0559	1.26759
C12 carnitine	0.0588	1.26231
C34:3 PC	0.0592	0.791139
C16:0 LPE	0.0632	0.794281
N-acetyltryptophan	0.0666	0.798085
C40:6 PE	0.0679	1.25376
1-methylguanosine	0.0763	1.2444
C34:1 DAG	0.0773	1.2444
C16:0 LPC	0.0778	0.803859
piperine	0.0884	0.809061
C22:5 LPC	0.0884	0.809717
C38:5 PE plasmalogen	0.0916	0.81103
serotonin	0.0959	0.813008
C14:1 carnitine	0.0976	1.22669
hydroxyproline	0.103	0.817661
N-acetylornithine	0.1034	0.818331
C12:1 carnitine	0.104	1.22205
urocanic acid	0.1093	0.819672
C18:2 LPE	0.1105	0.820345
N-acetylleucine	0.1117	1.21655
threo-sphingosine	0.114	1.2161
C14 carnitine	0.1219	1.21036
C8 carnitine	0.1251	1.20831
C18:1 carnitine	0.1266	1.20729
cotinine N-oxide	0.133	1.61342
acetaminophen glucuronide	0.1332	1.29853
N-methylproline	0.1341	1.2038
cinnamoylglycine	0.1398	0.833333
SDMA	0.1406	0.833333
urobilinogen	0.1466	1.21743
gabapentin	0.159	1.19076
hippurate	0.1642	0.84246
metronidazole	0.1649	1.30242
ribothymidine	0.1693	0.84317
GABA	0.1879	0.85034
N6,N6-dimethyllysine	0.1926	0.851064
cortisol	0.2034	1.16973
C34:3 PC plasmalogen	0.2067	0.855432
carvedilol	0.2073	0.534188
pantothenate	0.2104	0.856164
anthranilic acid	0.2112	1.1976
proline	0.2115	0.856898
C34:1 DAG*	0.2176	0.858369
C14:2 carnitine	0.221	1.16293
dimethylglycine	0.2264	1.1609
arginine	0.2369	0.863558
asparagine	0.2384	0.864304
C20:4 carnitine	0.2395	0.855432
guanine	0.242	1.15527
warfarin	0.2426	0.55371
4-hydroxy-3-methylacetophenone	0.2428	0.865801
C6 carnitine	0.243	1.15487
ectoine	0.2649	0.87108
3-methylhistidine	0.2711	0.873362
alanine	0.2781	0.874891
creatinine	0.2788	0.874891
1,7-dimethyluric acid	0.2817	0.8726
C32:2 PC	0.2833	0.875657
C18 carnitine	0.2834	0.875657
N-acetylmethionine	0.2903	1.14247
C22:6 LPC	0.2943	0.877963
kynurenic acid	0.3085	0.881834
caffeine	0.323	0.884956
C18:2 carnitine	0.3334	0.887311
hypoxanthine	0.338	0.888099
C5 carnitine	0.3505	0.891266
C38:6 PE	0.3527	1.12183
adenosine	0.3528	0.88968
trigonelline	0.354	0.891266
phenylalanine	0.3563	1.12095
C34:2 PE	0.3914	1.11185
hydroxycotinine	0.3928	0.847458
thyroxine	0.3932	1.11136
C34:4 PC	0.3936	0.90009
1-methylnicotinamide	0.3962	0.900901
myristoleate	0.4087	0.903342
C18:1 LPE	0.414	0.903342
N6,N6,N6-trimethyllysine	0.4187	0.904977
C18:0 LPE	0.4212	0.904977
cortisone	0.4258	0.907441
N-acetylalanine	0.4457	1.09866
C14:0 SM	0.4486	0.909918
ornithine	0.4513	0.910747
niacinamide	0.4518	1.09757
C3 carnitine	0.4561	0.909091
urate	0.4685	0.914077
carnitine	0.4966	0.968992
biliverdin	0.5022	0.925926
glycocholate	0.5099	1.08483
C5:1 carnitine	0.5117	0.92081
C36:2 PE	0.5135	1.08413
3-(N-acetyl-L-cystein-S-yl) acetaminophen	0.5189	1.11545
C3-DC-CH3 carnitine	0.5413	1.07852
serine	0.5467	1.07747
proline-betaine	0.601	1.06724
metoprolol	0.6022	0.869565
C34:0 PE	0.6152	0.93985
atenolol	0.6315	1.33976
creatine	0.6433	1.05887
kynurenine	0.6561	1.05664
hypotaurine	0.6577	0.946074
allopurinol riboside	0.658	1.10705
C20:4 LPE	0.6613	1.05574
C20:4 LPC	0.6863	0.951475
sphinganine	0.6965	0.953289
oleoyl glycine	0.7004	1.04877
cytosine	0.7101	0.95511
linoleoyl ethanolamide	0.7228	1.04668
phenylacetylglutamine	0.7241	0.956938
C30:0 PC	0.7266	0.957854
C36:5 PC plasmalogen	0.7314	0.958773
trimethylamine-N-oxide	0.7434	0.960615
alpha-glycerophosphocholine	0.7437	0.960615
metformin	0.7537	1.03961
4-pyridoxate	0.7729	1.03627
C18:1 LPC plasmalogen_A	0.784	0.967118
5-hydroxytryptophol	0.8044	0.968992
taurine	0.8137	1.02955
C16:0 SM	0.8234	1.02796
C2 carnitine	0.8285	0.988142
cotinine	0.8346	1.0321
C26 carnitine	0.8377	0.974659
pantothenol	0.845	1.02522
quinine	0.8554	1.05787
allantoin	0.8635	1.02145
C5-DC carnitine	0.874	1.01978
C16 carnitine	0.8761	1.01947
C34:2 DAG	0.8795	0.981354
glycodeoxycholate/glycochenodeoxycholate	0.8801	0.981354
bilirubin	0.8883	0.983284
valsartan	0.8899	1.02501
N6-acetyllysine	0.9057	0.985222
7-methylguanine	0.9149	0.987167
C18:2 SM	0.9165	1.01307
tyrosine	0.9593	0.994036
C16:1 SM	0.9705	1.00462
C9 carnitine	0.9784	0.997009
4-hydroxyhippurate	0.9846	0.998004
leucine	0.9888	1.0019
N1-methyl-2-pyridone-5-carboxamide	0.9899	1.0016
C4 carnitine	0.9913	0.999001
C22:6 LPE	0.9962	1.0006
xanthine	0.9964	0.999001

## Sheet: Supplementary Table 3
	Supplementary Table 3. Summary of inosine binding proteins discovered by LiP-SMap approach. Significant changes in the abundance of half-tryptic peptides (fold change > 2 or < 0.5, p < 0.001, > 2 peptides per protein) were as a readout for structural changes induced by binding of inosine.
	Protein Name	Peptides	Description	MEAN Ctrl treatment	MEAN Inosine treatment	P-VALUE	Fold Change (Ino vs Ctrl)	Log2 FC(Ino vs Ctrl)
	Srsf6	TNEGVIEFR	OS=Mus musculus GN=Srsf6	1.47434e-07	0.000481553	0.422594	3266.22	11.6734
	Nme1	VWEGLNVVK	OS=Mus musculus GN=Nme1	1.47434e-07	0.00025969	0.422553	1761.39	10.7825
	Mif	ASVPEGFLSELTQQL	OS=Mus musculus GN=Mif	1.47434e-07	0.000228092	0.4225	1547.08	10.5953
	Nup85	IEEELSGK	OS=Mus musculus GN=Nup85	1.47434e-07	0.000217455	0.185354	1474.93	10.5264
	Ddx17	DGPICLVLAPTR	OS=Mus musculus GN=Ddx17	1.47434e-07	0.00018713	0.422467	1269.24	10.3098
	GAPDH	WGEAGAEYVVEST	OS=Mus musculus GN=GAPDH	1.47434e-07	0.00015027	0.207838	1019.23	9.99326
	Ahnak	SDIDVSGPNVDVK	OS=Mus musculus GN=Ahnak	1.47434e-07	0.000133344	0.190994	904.43	9.82087
	Sfn	VLSSIEQK	OS=Mus musculus GN=Sfn	1.47434e-07	0.000131275	0.182875	890.395	9.7983
	Cfl1	NIILEEGK	OS=Mus musculus GN=Cfl1	1.47434e-07	0.000119506	0.0459647	810.569	9.66279
	Anxa5	GFQIEETIDR	OS=Mus musculus GN=Anxa5	1.47434e-07	8.85075e-05	0.191432	600.318	9.22958
	Phgdh	SLLPSLETWK	OS=Mus musculus GN=Phgdh	1.47434e-07	8.20099e-05	0.00305732	556.247	9.11958
	Rpl9	SVYAHFPINVVIQ	OS=Mus musculus GN=Rpl9	1.47434e-07	7.75925e-05	0.422302	526.285	9.0397
	Slc25a5	EQGVLSFWR	OS=Mus musculus GN=Slc25a5	1.47434e-07	7.4615e-05	0.0313458	506.089	8.98325
	Ywhab	YYEILNSPEK	OS=Mus musculus GN=Ywhab	1.47434e-07	6.43698e-05	0.422231	436.6	8.77017
	Arpc1b	EVEERPAPTPWGSK	OS=Mus musculus GN=Arpc1b	1.47434e-07	5.93999e-05	0.184713	402.891	8.65424
	Aimp1	ITFDAFPGEPDKELNPK	OS=Mus musculus GN=Aimp1	1.47434e-07	5.60691e-05	0.251824	380.299	8.57099
	Rpl18a	DLTTAGAVTQCYR	OS=Mus musculus GN=Rpl18a	1.47434e-07	5.52909e-05	0.184906	375.021	8.55083
	Cltc	VGYTPDWIFLLR	OS=Mus musculus GN=Cltc	1.47434e-07	5.41766e-05	0.00791937	367.463	8.52145
	Nap1l1	DFEIGHFLR	OS=Mus musculus GN=Nap1l1	1.47434e-07	4.86516e-05	0.000425441	329.988	8.36627
	Esd	ASEHGLVVIAPDTSPR	OS=Mus musculus GN=Esd	1.47434e-07	4.56241e-05	0.0274004	309.453	8.27358
	Rpl5	DIICQIAYAR	OS=Mus musculus GN=Rpl5	1.47434e-07	4.34663e-05	0.196017	294.818	8.20368
	Myh9	IMGIPEDEQMGLLR	OS=Mus musculus GN=Myh9	1.47434e-07	4.34112e-05	0.365527	294.444	8.20185
	Eif4g1	LKEELEEAR	OS=Mus musculus GN=Eif4g1	1.47434e-07	3.97589e-05	0.0497895	269.672	8.07506
	Xpo1	EFAGEDTSDLFLEER	OS=Mus musculus GN=Xpo1	1.47434e-07	3.87642e-05	0.185506	262.925	8.03851
	Aprt	LGPIPFFSLLQYD	OS=Mus musculus GN=Aprt	1.47434e-07	3.76274e-05	0.217585	255.214	7.99557
	Psmd3	ISDDLMQK	OS=Mus musculus GN=Psmd3	1.47434e-07	3.69334e-05	0.00890662	250.508	7.96871
	Uba1	TNSPLEAQLR	OS=Mus musculus GN=Uba1	1.47434e-07	3.65601e-05	0.421911	247.975	7.95405
	Got2	AELALGENNEVLK	OS=Mus musculus GN=Got2	1.47434e-07	3.58962e-05	0.183386	243.472	7.92761
	Ahnak	MPEMNIKPQ	OS=Mus musculus GN=Ahnak	1.47434e-07	3.55098e-05	0.187462	240.852	7.912
	Copb1	VLSTPDLEVR	OS=Mus musculus GN=Copb1	1.47434e-07	3.40601e-05	0.187122	231.019	7.85187
	Rpl9	ENGSLVEIR	OS=Mus musculus GN=Rpl9	1.47434e-07	3.20246e-05	0.0553567	217.212	7.76296
	Eif4h	VEFDEVDSLK	OS=Mus musculus GN=Eif4h	1.47434e-07	3.17056e-05	0.0394035	215.049	7.74852
	Tkt	SKDDQVTVIGA	OS=Mus musculus GN=Tkt	1.47434e-07	3.14723e-05	0.218839	213.466	7.73786
	Myof	AEDIPQMDDAFSQTVK	OS=Mus musculus GN=Myof	1.47434e-07	3.11381e-05	0.183326	211.2	7.72246
	Rpl3	AGMTHIVR	OS=Mus musculus GN=Rpl3	1.47434e-07	3.03306e-05	0.011885	205.723	7.68456
	Fubp1	GTPQQIDYAR	OS=Mus musculus GN=Fubp1	1.47434e-07	2.97195e-05	0.182849	201.578	7.65519
	Eno2	MLELDGTENK	OS=Mus musculus GN=Eno2	1.47434e-07	2.96991e-05	0.183031	201.44	7.6542
	Ppp1r14b	LNLEEWILEQLTRL	OS=Mus musculus GN=Ppp1r14b	1.47434e-07	2.9346e-05	0.218972	199.044	7.63695
	Rnf2	TDGLEIVVSPR	OS=Mus musculus GN=Rnf2	1.47434e-07	2.89266e-05	0.184592	196.2	7.61618
	Psmd13	YYQTIGNHASYYK	OS=Mus musculus GN=Psmd13	1.47434e-07	2.82136e-05	0.00106584	191.364	7.58018
	Tnpo1	YSDIDIILLK	OS=Mus musculus GN=Tnpo1	1.47434e-07	2.80894e-05	0.00679501	190.521	7.57381
	Ddx5	ELAQQVQQVAAEYCR	OS=Mus musculus GN=Ddx5	1.47434e-07	2.74609e-05	0.192307	186.258	7.54116
	Ahnak	SGQISGPEIK	OS=Mus musculus GN=Ahnak	1.47434e-07	2.7436e-05	0.0132158	186.089	7.53985
	Ube2o	SGYPDIGFPLFPLSK	OS=Mus musculus GN=Ube2o	1.47434e-07	2.55732e-05	0.00491438	173.454	7.43841
	Vars	VPLEVQEADEAKLQ	OS=Mus musculus GN=Vars	1.47434e-07	2.46178e-05	0.185813	166.975	7.38349
	Mtap	VNYQANIWALK	OS=Mus musculus GN=Mtap	1.47434e-07	2.4052e-05	0.18635	163.137	7.34994
	Nars	SPVASIVYELNPN	OS=Mus musculus GN=Nars	1.47434e-07	2.33595e-05	0.0388558	158.44	7.30779
	Flna	AEAGVPAEFGIWTR	OS=Mus musculus GN=Flna	1.47434e-07	2.32225e-05	0.421562	157.51	7.2993
	Dis3	LAYDDEIPSLR	OS=Mus musculus GN=Dis3	1.47434e-07	2.31805e-05	0.183006	157.226	7.29669
	Prdx5	LLADPTGAFGK	OS=Mus musculus GN=Prdx5	1.47434e-07	2.30839e-05	0.182992	156.57	7.29067
	Endod1	ILEVVNQVQDEER	OS=Mus musculus GN=Endod1	1.47434e-07	2.29748e-05	0.183415	155.831	7.28384
	Snrpb	GENLVSMTVEGPPPK	OS=Mus musculus GN=Snrpb	1.47434e-07	2.29599e-05	0.42155	155.73	7.2829
	Ppp1cb	IMRPTDVPDTGLLCDLL	OS=Mus musculus GN=Ppp1cb	1.47434e-07	2.21256e-05	0.188532	150.071	7.2295
	Msn	EKEELMEK	OS=Mus musculus GN=Msn	1.47434e-07	2.20743e-05	0.340277	149.723	7.22615
	Ahcy	ESLIDGIKR	OS=Mus musculus GN=Ahcy	1.47434e-07	2.10084e-05	0.183029	142.493	7.15475
	Ahcy	RESLIDGIK	OS=Mus musculus GN=Ahcy	1.47434e-07	2.04859e-05	0.188502	138.949	7.11841
	Rab1	QWLQEIDR	OS=Mus musculus GN=Rab1	1.47434e-07	2.00963e-05	0.331735	136.306	7.09071
	Prpf31	VIVDANNLTVEIENELNIIHK	OS=Mus musculus GN=Prpf31	1.47434e-07	1.99958e-05	0.0875635	135.625	7.08348
	Ap2b1	IQPGNPNYTLSLK	OS=Mus musculus GN=Ap2b1	1.47434e-07	1.99402e-05	0.189672	135.248	7.07946
	Ruvbl1	ALESSIAPIVIF	OS=Mus musculus GN=Ruvbl1	1.47434e-07	1.9811e-05	0.42128	134.372	7.07009
	Hspa4	VEPPKEEPK	OS=Mus musculus GN=Hspa4	1.47434e-07	1.95989e-05	0.200675	132.933	7.05456
	Capg	TTSGATPAAIR	OS=Mus musculus GN=Capg	1.47434e-07	1.92701e-05	0.195556	130.703	7.03015
	Apex1	NAGFTPQER	OS=Mus musculus GN=Apex1	1.47434e-07	1.91969e-05	0.185432	130.206	7.02465
	Nmt1	AIELFSVGQGPAK	OS=Mus musculus GN=Nmt1	1.47434e-07	1.91111e-05	0.420842	129.624	7.01819
	Eif3a	LLDMDGIIVEK	OS=Mus musculus GN=Eif3a	1.47434e-07	1.90786e-05	0.421324	129.404	7.01574
	Anxa2	GDLENAFLN	OS=Mus musculus GN=Anxa2	1.47434e-07	1.83148e-05	0.253258	124.224	6.9568
	Uba6	YVLGDTAMQK	OS=Mus musculus GN=Uba6	1.47434e-07	1.82333e-05	0.000486843	123.67	6.95036
	Gcn1l1	SPENVIETISSLLA	OS=Mus musculus GN=Gcn1l1	1.47434e-07	1.7943e-05	0.309945	121.701	6.9272
	Ranbp1	FLNAENAQK	OS=Mus musculus GN=Ranbp1	1.47434e-07	1.77595e-05	0.182064	120.457	6.91237
	Caprin1	YQEVTNNLEFAK	OS=Mus musculus GN=Caprin1	1.47434e-07	1.75137e-05	0.421098	118.79	6.89227
	Stmn2	ALEENNNFSK	OS=Mus musculus GN=Stmn2	1.47434e-07	1.72942e-05	0.183946	117.301	6.87407
	Eif3b	GVQLIDFSPCER	OS=Mus musculus GN=Eif3b	1.47434e-07	1.71631e-05	0.256047	116.412	6.8631
	Hnrnpll	TIPGTALVEMGDEYAVER	OS=Mus musculus GN=Hnrnpll	1.47434e-07	1.69588e-05	0.183555	115.026	6.84581
	Papss1	DIVPVDASYEVK	OS=Mus musculus GN=Papss1	1.47434e-07	1.67753e-05	0.00460474	113.781	6.83012
	Aldh2	TIEEVVGR	OS=Mus musculus GN=Aldh2	1.47434e-07	1.67085e-05	0.0052545	113.329	6.82437
	Dcps	TITLPYLESQ	OS=Mus musculus GN=Dcps	1.47434e-07	1.65268e-05	0.0536165	112.096	6.80859
	Arl1	ILILGLDGAGK	OS=Mus musculus GN=Arl1	1.47434e-07	1.61678e-05	0.00541979	109.661	6.77691
	Psmd8	ILFAEATR	OS=Mus musculus GN=Psmd8	1.47434e-07	1.60311e-05	0.420491	108.734	6.76466
	Gmfb	NTEDLTEEWLR	OS=Mus musculus GN=Gmfb	1.47434e-07	1.57432e-05	0.420922	106.781	6.73851
	Eif4g2	HFLPEMLSK	OS=Mus musculus GN=Eif4g2	1.47434e-07	1.56082e-05	0.194552	105.865	6.72608
	Stip1	LDPQNHVLYSNR	OS=Mus musculus GN=Stip1	1.47434e-07	1.54971e-05	0.421014	105.112	6.71578
	Ecm29	VNDVVPWVLDVILNK	OS=Mus musculus GN=Ecm29	1.47434e-07	1.54309e-05	0.190916	104.663	6.70961
	Rps17	LGNDFHTNK	OS=Mus musculus GN=Rps17	1.47434e-07	1.53073e-05	0.183205	103.825	6.69801
	Sec23a	AETEEGPDVLR	OS=Mus musculus GN=Sec23a	1.47434e-07	1.49185e-05	0.013437	101.188	6.66089
	Myo5a	LGILDLLDEECK	OS=Mus musculus GN=Myo5a	1.47434e-07	1.47538e-05	0.00298939	100.07	6.64487
	Psmd12	LNSLMSLVNK	OS=Mus musculus GN=Psmd12	1.47434e-07	1.46342e-05	0.420282	99.2593	6.63313
	Eif4g1	AALSVDEVEK	OS=Mus musculus GN=Eif4g1	1.47434e-07	1.46257e-05	0.420788	99.2017	6.63229
	Mthfd1l	TDPSTLTEEEVR	OS=Mus musculus GN=Mthfd1l	1.47434e-07	1.45861e-05	0.00513457	98.9329	6.62838
	Dnaja2	DGNDLHMTYK	OS=Mus musculus GN=Dnaja2	1.47434e-07	1.44773e-05	0.0329416	98.1945	6.61757
	Hspa5	VDIGGGQTK	OS=Mus musculus GN=Hspa5	1.47434e-07	1.43679e-05	0.190347	97.4526	6.60663
	Flna	DNGNGTYSCSYVPR	OS=Mus musculus GN=Flna	1.47434e-07	1.43234e-05	0.182618	97.1507	6.60215
	Cct2	KLGGSLADSYLDEGFLLDKK	OS=Mus musculus GN=Cct2	1.47434e-07	1.42644e-05	0.0914441	96.7505	6.5962
	Npepps	IDFVGELNDK	OS=Mus musculus GN=Npepps	1.47434e-07	1.41379e-05	0.181692	95.8926	6.58335
	Mars	IGTVSPLFQK	OS=Mus musculus GN=Mars	1.47434e-07	1.39703e-05	0.420833	94.7557	6.56614
	Ubap2l	GPAVFPVAPTSSK	OS=Mus musculus GN=Ubap2l	1.47434e-07	1.37483e-05	0.0572772	93.2501	6.54303
	Hmbs	AKDQDILDLVSVL	OS=Mus musculus GN=Hmbs	1.47434e-07	1.36097e-05	0.31808	92.3103	6.52842
	Eif3i	SYSSGGEDGYVR	OS=Mus musculus GN=Eif3i	1.47434e-07	1.35928e-05	0.185798	92.1953	6.52662
	Dync1h1	EFGPVVIDYGK	OS=Mus musculus GN=Dync1h1	1.47434e-07	1.3548e-05	0.420089	91.892	6.52187
	Dld	ALTGGIAHLFK	OS=Mus musculus GN=Dld	1.47434e-07	1.33826e-05	0.0293951	90.7698	6.50414
	Casp3	SVDSGIYLDSSYK	OS=Mus musculus GN=Casp3	1.47434e-07	1.33483e-05	0.42005	90.5374	6.50044
	Psmd13	SSDEAVILCK	OS=Mus musculus GN=Psmd13	1.47434e-07	1.32606e-05	0.0067835	89.9426	6.49093
	Fabp5	FDETTADGR	OS=Mus musculus GN=Fabp5	1.47434e-07	1.3234e-05	0.420028	89.7623	6.48804
	Hnrnpu	EVLADRPLFPH	OS=Mus musculus GN=Hnrnpu	1.47434e-07	1.31132e-05	0.196262	88.9427	6.4748
	Sumo1	VIGQDSSEIHFK	OS=Mus musculus GN=Sumo1	1.47434e-07	1.30607e-05	0.183793	88.5865	6.46901
	Hspa4	LNADEAVTR	OS=Mus musculus GN=Hspa4	1.47434e-07	1.30372e-05	0.202276	88.427	6.46641
	Cand1	HTVDDGLDIR	OS=Mus musculus GN=Cand1	1.47434e-07	1.29246e-05	0.42054	87.6631	6.4539
	P4hb	ILFIFIDSDHTDNQR	OS=Mus musculus GN=P4hb	1.47434e-07	1.28957e-05	0.419958	87.4671	6.45067
	Vcl	STVEGIQASVK	OS=Mus musculus GN=Vcl	1.47434e-07	1.28698e-05	0.00156528	87.2918	6.44777
	Vdac1	LTFDSSFSPNTGK	OS=Mus musculus GN=Vdac1	1.47434e-07	1.28521e-05	0.420528	87.1716	6.44579
	Usp7	IIGVHQEDELLECLSPATSR	OS=Mus musculus GN=Usp7	1.47434e-07	1.26959e-05	0.0060773	86.1125	6.42815
	Flna	GLHEGHTFEPAEFIIDTR	OS=Mus musculus GN=Flna	1.47434e-07	1.24609e-05	0.215289	84.518	6.40119
	Tpp2	SWVQTLRPVNAK	OS=Mus musculus GN=Tpp2	1.47434e-07	1.23729e-05	0.100541	83.9214	6.39097
	Gm9755	GTVVTGTLER	OS=Mus musculus GN=Gm9755	1.47434e-07	1.23517e-05	0.00790882	83.7777	6.38849
	Sfpq	ELLEEAFSQFGPIER	OS=Mus musculus GN=Sfpq	1.47434e-07	1.2299e-05	0.0481768	83.42	6.38232
	Hspa4l	LSLTQDPVVK	OS=Mus musculus GN=Hspa4l	1.47434e-07	1.2234e-05	0.202499	82.9793	6.37468
	Pitrm1	IAEMTDIKPILR	OS=Mus musculus GN=Pitrm1	1.47434e-07	1.2167e-05	0.183634	82.5246	6.36675
	Map4	DIEEITKPDVILAN	OS=Mus musculus GN=Map4	1.47434e-07	1.17991e-05	0.182429	80.0292	6.32245
	Myh9	VIQYLAHVASSHK	OS=Mus musculus GN=Myh9	1.47434e-07	1.17348e-05	0.108812	79.5936	6.31458
	Lmna	LDEYQELLDIK	OS=Mus musculus GN=Lmna	1.47434e-07	1.16681e-05	0.375083	79.1409	6.30635
	Pitpna	TVITNEYMK	OS=Mus musculus GN=Pitpna	1.47434e-07	1.16235e-05	0.00155294	78.8383	6.30082
	Ssrp1	ASSGLLYPLER	OS=Mus musculus GN=Ssrp1	1.47434e-07	1.15474e-05	0.181735	78.3226	6.29136
	Eif3j	KGVVPGGGLK	OS=Mus musculus GN=Eif3j	1.47434e-07	1.15288e-05	0.182738	78.1964	6.28903
	Hspg2	TVQQGQDASFK	OS=Mus musculus GN=Hspg2	1.47434e-07	1.13604e-05	0.181242	77.0542	6.2678
	Aldh2	TIPIDGDFFSYTR	OS=Mus musculus GN=Aldh2	1.47434e-07	1.13479e-05	0.419584	76.9692	6.26621
	Rars	LMDLLEEGLK	OS=Mus musculus GN=Rars	1.47434e-07	1.13136e-05	0.274559	76.7367	6.26184
	Qars	VYCPVQWEYGR	OS=Mus musculus GN=Qars	1.47434e-07	1.12217e-05	0.183765	76.1132	6.25007
	Usp7	IQSLLDIQEK	OS=Mus musculus GN=Usp7	1.47434e-07	1.12181e-05	0.183162	76.0885	6.24961
	Smarcc1	HVTNPAFTK	OS=Mus musculus GN=Smarcc1	1.47434e-07	1.12136e-05	0.0423765	76.0584	6.24904
	Eif3m	EDDKDVESVMNSVVSLL	OS=Mus musculus GN=Eif3m	1.47434e-07	1.12063e-05	0.373469	76.009	6.2481
	Fasn	ALIAEATK	OS=Mus musculus GN=Fasn	1.47434e-07	1.11915e-05	0.419541	75.9081	6.24618
	Ipo5	HIVENAVQK	OS=Mus musculus GN=Ipo5	4.74296e-07	3.57892e-05	0.146121	75.4575	6.23759
	Ipo7	ENIVEAIIH	OS=Mus musculus GN=Ipo7	1.47434e-07	1.10491e-05	0.140609	74.9422	6.22771
	Ddx5	TAQEVDTYR	OS=Mus musculus GN=Ddx5	1.47434e-07	1.1034e-05	0.198356	74.84	6.22574
	Frg1	EQWEPVFQDGK	OS=Mus musculus GN=Frg1	1.47434e-07	1.1004e-05	0.182711	74.6366	6.22181
	Mcm2	GVCLIDEFDKMNDQDR	OS=Mus musculus GN=Mcm2	1.47434e-07	1.09916e-05	0.0901472	74.5522	6.22018
	Eif3l	GDPQVYEELFSYACPK	OS=Mus musculus GN=Eif3l	1.47434e-07	1.08301e-05	0.227168	73.4571	6.19883
	Ldha	DYCVTANSK	OS=Mus musculus GN=Ldha	1.47434e-07	1.08179e-05	0.272851	73.374	6.1972
	Nme1	EISLWFQPEELVEYK	OS=Mus musculus GN=Nme1	1.76862e-06	0.000129704	0.202128	73.3366	6.19646
	Psmc2	PDYLGADQR	OS=Mus musculus GN=Psmc2	1.47434e-07	1.07749e-05	0.18379	73.0825	6.19145
	Aldh18a1	GPVGLEGLLTTK	OS=Mus musculus GN=Aldh18a1	1.47434e-07	1.07437e-05	0.181528	72.8708	6.18727
	Sfn	EKVETELR	OS=Mus musculus GN=Sfn	1.47434e-07	1.07159e-05	0.342356	72.6825	6.18354
	Ube2m	EAAEVLQNNR	OS=Mus musculus GN=Ube2m	1.47434e-07	1.07131e-05	0.196661	72.6634	6.18316
	Ipo9	FRPPETTER	OS=Mus musculus GN=Ipo9	1.47434e-07	1.06849e-05	0.184128	72.4725	6.17936
	Txnrd1	IPVTDEEQTNVPYIYAIGDILEGK	OS=Mus musculus GN=Txnrd1	1.47434e-07	1.04702e-05	0.340313	71.0161	6.15008
	Flna	NGQHVASSPIPVVISQ	OS=Mus musculus GN=Flna	1.47434e-07	1.04176e-05	0.188785	70.6592	6.14281
	Tubb6	EVDEQMLAIQNK	OS=Mus musculus GN=Tubb6	1.47434e-07	1.04096e-05	0.182309	70.6051	6.1417
	Aldoa	AAQEEYIKR	OS=Mus musculus GN=Aldoa	1.47434e-07	1.03468e-05	0.396806	70.1789	6.13297
	Sec24c	SPLDSTAEPPAVR	OS=Mus musculus GN=Sec24c	1.47434e-07	1.01801e-05	0.181812	69.0484	6.10954
	Rps13	LTSDDVKEQIYK	OS=Mus musculus GN=Rps13	1.47434e-07	1.01691e-05	0.191633	68.9734	6.10797
	Mthfd1	QPSQGPTFGIK	OS=Mus musculus GN=Mthfd1	1.47434e-07	1.01112e-05	0.419942	68.581	6.09974
	Mcm7	SVHFSEAEQR	OS=Mus musculus GN=Mcm7	1.47434e-07	1.00955e-05	0.0144681	68.4744	6.09749
	Herc4	VIFVGEDAVDAGGVR	OS=Mus musculus GN=Herc4	1.47434e-07	1.00903e-05	0.181647	68.4391	6.09675
	Flnb	AGGPGLER	OS=Mus musculus GN=Flnb	1.47434e-07	1.00546e-05	0.254841	68.1972	6.09164
	Cdc37	ESDGQVELER	OS=Mus musculus GN=Cdc37	1.47434e-07	9.9832e-06	0.183282	67.7128	6.08136
	Ssr4	FFDEESYSLLR	OS=Mus musculus GN=Ssr4	1.47434e-07	9.94618e-06	0.420084	67.4617	6.076
	S100a10	EFPGFLENQK	OS=Mus musculus GN=S100a10	1.47434e-07	9.90763e-06	0.420074	67.2003	6.0704
	Mtap	NMAQFSVLPPRH	OS=Mus musculus GN=Mtap	1.47434e-07	9.68996e-06	0.419822	65.7238	6.03834
	Mcm4	VEAIDVEEAK	OS=Mus musculus GN=Mcm4	1.47434e-07	9.67393e-06	0.235219	65.6152	6.03596
	Hmga1	EPSEVPTPK	OS=Mus musculus GN=Hmga1	1.47434e-07	9.67204e-06	0.419816	65.6023	6.03567
	Pdcl3	AISTTCIPNYPDR	OS=Mus musculus GN=Pdcl3	1.47434e-07	9.62991e-06	0.184995	65.3166	6.02938
	Nmt1	SGLSPANDTGAK	OS=Mus musculus GN=Nmt1	1.47434e-07	9.58663e-06	0.065684	65.023	6.02288
	Fmr1	FHEQFIVR	OS=Mus musculus GN=Fmr1	1.47434e-07	9.44817e-06	0.0467239	64.0839	6.00189
	Kif5b	ILQDSLGGNCR	OS=Mus musculus GN=Kif5b	1.47434e-07	9.2626e-06	0.00511623	62.8252	5.97327
	Dynll1	NFGSYVTHETK	OS=Mus musculus GN=Dynll1	1.47434e-07	9.22235e-06	0.00501803	62.5522	5.96699
	Tardbp	AFAFVTFADDKVAQSLCGEDLIIK	OS=Mus musculus GN=Tardbp	1.47434e-07	9.19708e-06	0.237635	62.3808	5.96303
	Cycs	TGQAAGFSYTDANK	OS=Mus musculus GN=Cycs	1.47434e-07	9.09315e-06	0.181097	61.6759	5.94663
	Xrcc6	VELSEEELK	OS=Mus musculus GN=Xrcc6	1.47434e-07	9.073e-06	0.181912	61.5392	5.94343
	Vcp	IHVLPIDDTVEGI	OS=Mus musculus GN=Vcp	1.47434e-07	9.0684e-06	0.181884	61.508	5.9427
	Stam	DFASEVSNVLNK	OS=Mus musculus GN=Stam	1.47434e-07	9.04507e-06	0.000572137	61.3498	5.93899
	Hnrnpc	VPPPPPIAR	OS=Mus musculus GN=Hnrnpc	1.47434e-07	9.02212e-06	0.419608	61.1941	5.93532
	Prdx5	FSMVIDNGIVK	OS=Mus musculus GN=Prdx5	1.47434e-07	8.87806e-06	0.418713	60.217	5.9121
	Rpap3	NLDPDVFNQIIK	OS=Mus musculus GN=Rpap3	1.47434e-07	8.85173e-06	0.185694	60.0384	5.90781
	Rnf213	EAANQDALQEAGTFR	OS=Mus musculus GN=Rnf213	1.47434e-07	8.83037e-06	0.011228	59.8935	5.90433
	Fscn1	YWTLTATGGVQSTASTK	OS=Mus musculus GN=Fscn1	1.47434e-07	8.81692e-06	0.418685	59.8023	5.90213
	Rpn1	FVDHVFDEQVIDSL	OS=Mus musculus GN=Rpn1	1.47434e-07	8.69371e-06	0.390328	58.9666	5.88183
	Nt5c	NEQYGALRPDLAEK	OS=Mus musculus GN=Nt5c	1.47434e-07	8.66898e-06	0.1809	58.7989	5.87772
	Sec23b	FSWNVWPSSR	OS=Mus musculus GN=Sec23b	1.47434e-07	8.63435e-06	0.419686	58.564	5.87194
	Ncapd2	NFFNELSHK	OS=Mus musculus GN=Ncapd2	1.47434e-07	8.61464e-06	0.0205558	58.4303	5.86865
	Ppp1r18	LSPGETPEESLR	OS=Mus musculus GN=Ppp1r18	1.47434e-07	8.57008e-06	0.184392	58.1281	5.86116
	Tjap1	ELEIGQDCLELELGQSR	OS=Mus musculus GN=Tjap1	1.47434e-07	8.5356e-06	0.182917	57.8942	5.85535
	Eif2b4	LGLQYSQGLISGSNAR	OS=Mus musculus GN=Eif2b4	1.47434e-07	8.52173e-06	0.181624	57.8002	5.853
	Parp1	MVDPEKPQLGMIDR	OS=Mus musculus GN=Parp1	1.47434e-07	8.42544e-06	0.0077609	57.147	5.83661
	Hsp90ab1	AKFENLCK	OS=Mus musculus GN=Hsp90ab1	1.47434e-07	8.37956e-06	0.418473	56.8358	5.82873
	Hnrnpm	LLFDRPMHVK	OS=Mus musculus GN=Hnrnpm	1.47434e-07	8.33688e-06	0.184375	56.5464	5.82136
	Tfrc	DALGAGVAAK	OS=Mus musculus GN=Tfrc	1.47434e-07	8.3148e-06	0.258849	56.3966	5.81754
	Eif3f	YAYYDTER	OS=Mus musculus GN=Eif3f	1.47434e-07	8.26177e-06	0.180364	56.0369	5.80831
	Cops5	LEQSEAQLGR	OS=Mus musculus GN=Cops5	1.47434e-07	8.19159e-06	0.182815	55.5609	5.796
	Cct6a	TEVNSGFFYK	OS=Mus musculus GN=Cct6a	1.47434e-07	8.09312e-06	0.419483	54.893	5.77855
	Hspa9	CELSSSVQTDINLPYLTMDASGPK	OS=Mus musculus GN=Hspa9	1.47434e-07	8.03329e-06	0.419459	54.4872	5.76785
	Flnc	GAGTGGLGLAIEGPSEAK	OS=Mus musculus GN=Flnc	1.47434e-07	7.9381e-06	0.000640517	53.8416	5.75065
	Pygb	VLYPNDNFFEGK	OS=Mus musculus GN=Pygb	1.47434e-07	7.80994e-06	0.418161	52.9723	5.72717
	Xpot	NAQEALEAIETK	OS=Mus musculus GN=Xpot	1.47434e-07	7.77497e-06	0.419109	52.7351	5.72069
	Hat1	FCQFLPSFSR	OS=Mus musculus GN=Hat1	1.47434e-07	7.63326e-06	0.182521	51.7739	5.69415
	Arpc4	KPVEGYDISFLIT	OS=Mus musculus GN=Arpc4	1.47434e-07	7.62729e-06	0.318058	51.7334	5.69303
	Dnpep	SPSPFHVVAECR	OS=Mus musculus GN=Dnpep	1.47434e-07	7.56918e-06	0.00561936	51.3393	5.68199
	Hnrnpd	YHNVGLSK	OS=Mus musculus GN=Hnrnpd	1.47434e-07	7.53989e-06	0.417996	51.1407	5.6764
	Cttn	TVPIEAVTSK	OS=Mus musculus GN=Cttn	1.47434e-07	7.49407e-06	0.417966	50.8299	5.6676
	Ppp1r7	SLETVYLER	OS=Mus musculus GN=Ppp1r7	1.47434e-07	7.49149e-06	0.180181	50.8124	5.66711
	Cct6a	MLVSGAGDIK	OS=Mus musculus GN=Cct6a	1.47434e-07	7.46175e-06	0.418956	50.6106	5.66137
	Pdia3	DGEEAGAYDGPR	OS=Mus musculus GN=Pdia3	1.47434e-07	7.42374e-06	0.0690034	50.3528	5.654
	Dmxl2	LPLGGSIK	OS=Mus musculus GN=Dmxl2	1.47434e-07	7.33195e-06	0.418889	49.7303	5.63605
	Nup205	FTDELMEQGLTYK	OS=Mus musculus GN=Nup205	1.47434e-07	7.29449e-06	0.18175	49.4761	5.62866
	Pnp	KLQEGTYVMLAGPNFETVAESR	OS=Mus musculus GN=Pnp	1.47434e-07	7.15234e-06	0.417737	48.512	5.60027
	Bzw1	YFTEAGLK	OS=Mus musculus GN=Bzw1	1.47434e-07	7.0701e-06	0.418746	47.9542	5.58359
	Psmb1	SGFHGDCLTLTK	OS=Mus musculus GN=Psmb1	1.47434e-07	7.0679e-06	0.3118	47.9393	5.58314
	Copb1	VLSECSPLMNDIFNK	OS=Mus musculus GN=Copb1	1.47434e-07	7.06307e-06	0.418742	47.9065	5.58215
	Clta	DIDESSPGTEWER	OS=Mus musculus GN=Clta	6.78733e-07	3.21782e-05	0.187579	47.4092	5.56709
	Eftud2	GLAEDIENEVVQITWNR	OS=Mus musculus GN=Eftud2	1.47434e-07	6.95386e-06	0.417592	47.1658	5.55967
	Ywhaq	YYEILNNPELACTLAK	OS=Mus musculus GN=Ywhaq	1.47434e-07	6.90533e-06	0.223529	46.8366	5.54956
	Prep	SNFLVLCYLHDVK	OS=Mus musculus GN=Prep	1.47434e-07	6.86398e-06	0.180203	46.5561	5.5409
	Kpna1	NAVWALSNLCR	OS=Mus musculus GN=Kpna1	1.47434e-07	6.85811e-06	0.418898	46.5163	5.53967
	Nle1	LLVSGSSDSTLK	OS=Mus musculus GN=Nle1	1.47434e-07	6.81822e-06	0.184066	46.2458	5.53125
	Supt6h	HETEQFPAEPLELAK	OS=Mus musculus GN=Supt6h	1.47434e-07	6.66459e-06	0.00720687	45.2038	5.49837
	Gnb2	LLVSASQDGK	OS=Mus musculus GN=Gnb2	1.47434e-07	6.60381e-06	0.417316	44.7915	5.48515
	Tcerg1	AIVPLEAR	OS=Mus musculus GN=Tcerg1	1.47434e-07	6.57122e-06	0.185564	44.5705	5.47802
	Hars	IGDYVQQHGGVSLVEQLLQDPK	OS=Mus musculus GN=Hars	1.47434e-07	6.56391e-06	0.418437	44.5209	5.47641
	Eif5a	YDCGEEILITVLSAMTEEAAVAIK	OS=Mus musculus GN=Eif5a	1.47434e-07	6.56202e-06	0.0569816	44.5081	5.476
	Rpl38	KIEEIKDF	OS=Mus musculus GN=Rpl38	9.74781e-07	4.33025e-05	0.429308	44.4228	5.47323
	Scpep1	EVWDYVTVR	OS=Mus musculus GN=Scpep1	1.47434e-07	6.54825e-06	0.418427	44.4147	5.47296
	Uba1	TYGLTGSQDR	OS=Mus musculus GN=Uba1	1.47434e-07	6.5373e-06	0.207176	44.3404	5.47055
	Atp5c1	THSDQFLVSFK	OS=Mus musculus GN=Atp5c1	1.47434e-07	6.45526e-06	0.182636	43.7839	5.45233
	Vcl	MALLMAEMSR	OS=Mus musculus GN=Vcl	1.47434e-07	6.44138e-06	0.417178	43.6898	5.44922
	Atic	NAWQLVTELR	OS=Mus musculus GN=Atic	1.47434e-07	6.4276e-06	0.191713	43.5964	5.44614
	GAPDH	VVDLMAYMASKE	OS=Mus musculus GN=GAPDH	1.47434e-07	6.4011e-06	0.417142	43.4166	5.44018
	Ilf3	QDMGLPTGAEGR	OS=Mus musculus GN=Ilf3	1.47434e-07	6.37312e-06	0.18702	43.2268	5.43386
	Plec	VEDPETGLR	OS=Mus musculus GN=Plec	1.47434e-07	6.37222e-06	0.181101	43.2207	5.43365
	Atp1a1	LSLDELHR	OS=Mus musculus GN=Atp1a1	1.47434e-07	6.30236e-06	0.417053	42.7469	5.41775
	Glo1	RFEELGVK	OS=Mus musculus GN=Glo1	1.47434e-07	6.30195e-06	0.418557	42.7441	5.41765
	Fam98b	EMACPYSVLVSGDIK	OS=Mus musculus GN=Fam98b	1.47434e-07	6.27147e-06	0.014602	42.5374	5.41066
	Hells	YLIVDEGHR	OS=Mus musculus GN=Hells	1.47434e-07	6.2507e-06	0.184487	42.3965	5.40587
	Prdx2	KEGGLGPLNI	OS=Mus musculus GN=Prdx2	1.47434e-07	6.15838e-06	0.00797474	41.7703	5.38441
	Dld	VCHAHPTLSEAFR	OS=Mus musculus GN=Dld	1.47434e-07	6.08891e-06	0.357144	41.2991	5.36804
	Gm9493	ELNITAAK	OS=Mus musculus GN=Gm9493	1.47434e-07	6.07065e-06	0.331467	41.1753	5.36371
	Gsn	DSQEEEKTEALTSAK	OS=Mus musculus GN=Gsn	1.47434e-07	6.06736e-06	0.00515582	41.153	5.36292
	Pkn2	ATSVALPGWSPSDNR	OS=Mus musculus GN=Pkn2	1.47434e-07	6.05361e-06	0.418071	41.0597	5.35965
	Sh3gl1	FIDPLQNLCDK	OS=Mus musculus GN=Sh3gl1	1.47434e-07	6.05146e-06	0.205933	41.0451	5.35914
	Plec	ALVPAAELLDSGVISHELYQQLQR	OS=Mus musculus GN=Plec	1.47434e-07	6.03636e-06	0.418057	40.9427	5.35553
	Pdia4	YGIVDYMIEQSGPPSK	OS=Mus musculus GN=Pdia4	1.47434e-07	6.02188e-06	0.416784	40.8445	5.35207
	Rrm2	EYLFNAIETMPCVK	OS=Mus musculus GN=Rrm2	1.47434e-07	5.96598e-06	0.182765	40.4653	5.33861
	Ide	LHIEALLHGNITK	OS=Mus musculus GN=Ide	1.47434e-07	5.9436e-06	0.181511	40.3135	5.33319
	Tpp2	ICEVINEAVWK	OS=Mus musculus GN=Tpp2	1.47434e-07	5.91917e-06	0.182897	40.1478	5.32725
	Ap2a1	LVECLETVLNK	OS=Mus musculus GN=Ap2a1	1.47434e-07	5.91794e-06	0.381391	40.1395	5.32695
	Rfc3	VVLLTEVDK	OS=Mus musculus GN=Rfc3	1.47434e-07	5.87738e-06	0.0104016	39.8643	5.31703
	Eif2s2	EKNPDMVAGEK	OS=Mus musculus GN=Eif2s2	1.47434e-07	5.85697e-06	0.246511	39.726	5.31201
	Ipo9	IFTMAEVYGIR	OS=Mus musculus GN=Ipo9	1.47434e-07	5.80408e-06	0.416556	39.3672	5.29892
	Eif3f	FLMSLVNQVPK	OS=Mus musculus GN=Eif3f	1.47434e-07	5.78245e-06	0.416533	39.2205	5.29354
	Tpd52l2	VEEEIVTLR	OS=Mus musculus GN=Tpd52l2	1.47434e-07	5.771e-06	0.000373205	39.1428	5.29068
	Bcap31	AENEALAMQK	OS=Mus musculus GN=Bcap31	1.47434e-07	5.70223e-06	0.011174	38.6764	5.27338
	Polr2b	LDDDGLIAPGVR	OS=Mus musculus GN=Polr2b	1.47434e-07	5.65559e-06	0.417738	38.36	5.26153
	Apeh	SALYYVDLSGGK	OS=Mus musculus GN=Apeh	1.47434e-07	5.63157e-06	0.417716	38.1971	5.25539
	Ddx3x	ELAVQIYEEAR	OS=Mus musculus GN=Ddx3x	1.47434e-07	5.60954e-06	0.417696	38.0477	5.24974
	Brox	IPTEAPQLELK	OS=Mus musculus GN=Brox	1.47434e-07	5.59639e-06	0.416322	37.9585	5.24635
	Pkn2	DFDLEPEPPPAPPR	OS=Mus musculus GN=Pkn2	1.47434e-07	5.58257e-06	0.181209	37.8647	5.24278
	Por	FAVFGLGNK	OS=Mus musculus GN=Por	1.47434e-07	5.54282e-06	0.18859	37.5951	5.23247
	Snrnp70	QQEVETELK	OS=Mus musculus GN=Snrnp70	1.47434e-07	5.52234e-06	0.180013	37.4562	5.22713
	Ovca2	VIPSQESMQLASR	OS=Mus musculus GN=Ovca2	1.47434e-07	5.48899e-06	0.416194	37.23	5.21839
	Hnrnpm	YVELLMDAEGK	OS=Mus musculus GN=Hnrnpm	1.47434e-07	5.47714e-06	0.181146	37.1496	5.21528
	Pgk1	QIVWNGPVGVFEWEAFAR	OS=Mus musculus GN=Pgk1	1.47434e-07	5.47157e-06	0.416173	37.1119	5.21381
	Cd44	EPSETPDQCMTADETR	OS=Mus musculus GN=Cd44	1.47434e-07	5.44559e-06	0.0135506	36.9357	5.20694
	Gsn	EPGLQIWR	OS=Mus musculus GN=Gsn	1.47434e-07	5.39108e-06	0.417489	36.566	5.19243
	Rps27	LTEGCSFR	OS=Mus musculus GN=Rps27	1.47434e-07	5.33747e-06	0.181308	36.2024	5.17801
	Msh2	NNSFVNEIISR	OS=Mus musculus GN=Msh2	1.47434e-07	5.32936e-06	0.201179	36.1473	5.17582
	Pfdn2	IIETLSQQLQAK	OS=Mus musculus GN=Pfdn2	1.47434e-07	5.31315e-06	0.188699	36.0374	5.17142
	Bin1	IAENNDLLWMDYHQK	OS=Mus musculus GN=Bin1	1.47434e-07	5.3097e-06	0.00701824	36.014	5.17049
	Arf5	QDMPNAMPVSELTDK	OS=Mus musculus GN=Arf5	1.47434e-07	5.30866e-06	0.417406	36.007	5.1702
	Dnajc8	LLLDQEQK	OS=Mus musculus GN=Dnajc8	1.47434e-07	5.29419e-06	0.00230948	35.9088	5.16626
	Dis3	NVIVLQTVMQEVR	OS=Mus musculus GN=Dis3	1.47434e-07	5.28764e-06	0.210097	35.8643	5.16448
	Arcn1	ENVNLAQIR	OS=Mus musculus GN=Arcn1	1.47434e-07	5.28111e-06	0.417738	35.8201	5.1627
	Capn1	LEICNLTPDALK	OS=Mus musculus GN=Capn1	1.47434e-07	5.27202e-06	0.185382	35.7584	5.16021
	Hk2	HIDMVEGDEGR	OS=Mus musculus GN=Hk2	1.47434e-07	5.25358e-06	0.0783924	35.6333	5.15516
	Pkm	PVAVALDTK	OS=Mus musculus GN=Pkm	1.47434e-07	5.15725e-06	0.179112	34.9799	5.12846
	Acot7	ATLWYVPLSLK	OS=Mus musculus GN=Acot7	1.47434e-07	5.14943e-06	0.417608	34.927	5.12627
	Edc4	EAFQSVVLPAFEK	OS=Mus musculus GN=Edc4	1.47434e-07	5.13175e-06	0.417218	34.807	5.12131
	S100a11	HDSFIQTSQK	OS=Mus musculus GN=S100a11	1.47434e-07	5.12705e-06	0.228111	34.7751	5.11998
	Basp1	ETPAASEAPSSAAK	OS=Mus musculus GN=Basp1	1.47434e-07	5.09702e-06	0.179332	34.5715	5.11151
	Nup155	LYFSTCPFR	OS=Mus musculus GN=Nup155	1.47434e-07	5.07163e-06	0.00459211	34.3992	5.1043
	Abi2	VTGLFPGNYVESIMHYSE	OS=Mus musculus GN=Abi2	1.47434e-07	5.0561e-06	0.417134	34.2939	5.09988
	Tfg	TDDQVSGPPSAPTEDR	OS=Mus musculus GN=Tfg	1.47434e-07	4.9909e-06	0.191888	33.8517	5.08116
	Flna	YKGQHVPGSPFQFTVGPLGEGGAHK	OS=Mus musculus GN=Flna	1.47434e-07	4.97951e-06	0.18322	33.7744	5.07786
	Osbpl11	SFSLASSGNSPISQR	OS=Mus musculus GN=Osbpl11	1.47434e-07	4.97833e-06	0.417045	33.7664	5.07752
	Rps18	YSQVLANGLDNK	OS=Mus musculus GN=Rps18	1.47434e-07	4.96076e-06	0.415479	33.6472	5.07241
	Ddx6	VDHVQMIVLDEADK	OS=Mus musculus GN=Ddx6	1.47434e-07	4.95855e-06	0.417021	33.6323	5.07177
	Cs	TVVGQITVD	OS=Mus musculus GN=Cs	1.47434e-07	4.95803e-06	0.261579	33.6287	5.07162
	Ganab	FPQPLNMLEHLASK	OS=Mus musculus GN=Ganab	1.47434e-07	4.81815e-06	0.0282967	32.68	5.03033
	Lgmn	DYTGEDVTPENFLAVLR	OS=Mus musculus GN=Lgmn	1.47434e-07	4.80248e-06	0.41723	32.5736	5.02563
	Echdc2	EQMSDVEVGTFVQR	OS=Mus musculus GN=Echdc2	1.47434e-07	4.80042e-06	0.180764	32.5597	5.02501
	Mybbp1a	NPSWTSSYMCFR	OS=Mus musculus GN=Mybbp1a	1.47434e-07	4.75218e-06	0.41717	32.2325	5.01044
	Thop1	LSEFDVEMSMR	OS=Mus musculus GN=Thop1	1.47434e-07	4.72593e-06	0.417139	32.0544	5.00245
	Canx	NKRDEEEEEEKLEEK	OS=Mus musculus GN=Canx	1.47434e-07	4.7241e-06	0.415105	32.0421	5.00189
	Crk	DSSTSPGDYVLSVSENSR	OS=Mus musculus GN=Crk	1.47434e-07	4.67233e-06	0.0560017	31.6909	4.986
	Usp14	SSSSGHYVSWVR	OS=Mus musculus GN=Usp14	1.47434e-07	4.65587e-06	0.414989	31.5792	4.9809
	Cltc	NNRPSEGPLQTR	OS=Mus musculus GN=Cltc	7.53039e-07	2.37156e-05	0.274034	31.4932	4.97697
	Fxr1	GFLEFVEDFIQVPR	OS=Mus musculus GN=Fxr1	1.47434e-07	4.62803e-06	0.188956	31.3905	4.97225
	Krt8	SFTSGPGAR	OS=Mus musculus GN=Krt8	1.47434e-07	4.61792e-06	0.414924	31.3219	4.9691
	Uggt1	VWQLQDLSFQTAAR	OS=Mus musculus GN=Uggt1	1.47434e-07	4.61249e-06	0.416998	31.285	4.9674
	Pdia3	DPNIVIAK	OS=Mus musculus GN=Pdia3	1.47434e-07	4.6059e-06	0.204904	31.2404	4.96534
	Gbf1	NEEIVMPEEQTGLVR	OS=Mus musculus GN=Gbf1	1.47434e-07	4.59328e-06	0.416973	31.1547	4.96138
	Mapk1	ISPFEHQTYCQR	OS=Mus musculus GN=Mapk1	1.47434e-07	4.59278e-06	0.416555	31.1514	4.96122
	Gtf2i	SPTWFGIPR	OS=Mus musculus GN=Gtf2i	1.47434e-07	4.56994e-06	0.184058	30.9965	4.95403
	Map1b	DLTGQVPTPPVK	OS=Mus musculus GN=Map1b	1.47434e-07	4.48727e-06	0.416405	30.4357	4.92769
	Smc4	LLEENVSVFK	OS=Mus musculus GN=Smc4	1.47434e-07	4.47721e-06	0.000472888	30.3675	4.92446
	Ctnna1	TSVQTEDDQLIAGQSAR	OS=Mus musculus GN=Ctnna1	1.47434e-07	4.45676e-06	0.179811	30.2288	4.91785
	Fubp1	RPLEDGDQPDAK	OS=Mus musculus GN=Fubp1	1.47434e-07	4.40457e-06	0.414532	29.8747	4.90085
	Prpf3	DQTKPTPLILDEQGR	OS=Mus musculus GN=Prpf3	1.47434e-07	4.40252e-06	0.197559	29.8609	4.90019
	Map1b	DIKPQLELIEDEEK	OS=Mus musculus GN=Map1b	1.47434e-07	4.37304e-06	0.00115307	29.6609	4.89049
	Ppp4r2	TGETMIQWSQFK	OS=Mus musculus GN=Ppp4r2	1.47434e-07	4.3634e-06	0.414452	29.5956	4.88731
	Sfpq	HHQGPPPGGPGPR	OS=Mus musculus GN=Sfpq	1.47434e-07	4.34237e-06	0.180542	29.4529	4.88034
	Thop1	NGLHLPQDTQEK	OS=Mus musculus GN=Thop1	1.47434e-07	4.30011e-06	0.0075909	29.1663	4.86623
	G3bp1	QYYTLLNQAPDMLHR	OS=Mus musculus GN=G3bp1	1.47434e-07	4.25268e-06	0.180124	28.8446	4.85023
	Srm	NPSTNFREPVQQLTQAQVEQMQLK	OS=Mus musculus GN=Srm	1.47434e-07	4.24509e-06	0.200745	28.7931	4.84765
	Gspt1	YIGLPFIPYLDNLPNFNR	OS=Mus musculus GN=Gspt1	1.47434e-07	4.22995e-06	0.226135	28.6904	4.8425
	Myh9	QRYEILTPNSIPK	OS=Mus musculus GN=Myh9	1.47434e-07	4.16839e-06	0.416369	28.2729	4.82135
	Cct2	KIHPQTIISGWR	OS=Mus musculus GN=Cct2	1.47434e-07	4.1648e-06	0.416363	28.2485	4.8201
	Ncbp1	FENFVSVTQEEDVPQVR	OS=Mus musculus GN=Ncbp1	1.47434e-07	4.15211e-06	0.189004	28.1624	4.8157
	Rpl3	DDASKPVHLTAF	OS=Mus musculus GN=Rpl3	1.47434e-07	4.15035e-06	0.195918	28.1505	4.81509
	Dctn2	DLAVLDQVEAR	OS=Mus musculus GN=Dctn2	1.47434e-07	4.13509e-06	0.180489	28.047	4.80977
	Pla2g4a	AMVGFSGVMK	OS=Mus musculus GN=Pla2g4a	1.47434e-07	4.11312e-06	0.41628	27.898	4.80209
	Sptan1	EAALTNEEVGADLEQVEVLQK	OS=Mus musculus GN=Sptan1	1.47434e-07	4.09097e-06	0.415773	27.7478	4.7943
	Hspa4l	LEDTENWLYEEGEDQPK	OS=Mus musculus GN=Hspa4l	1.47434e-07	4.04358e-06	0.183938	27.4263	4.77749
	Usp7	HQYINEDEYEVNLK	OS=Mus musculus GN=Usp7	1.47434e-07	3.99264e-06	0.206487	27.0808	4.7592
	Pfdn5	DCLNVLNK	OS=Mus musculus GN=Pfdn5	1.47434e-07	3.93819e-06	0.00377121	26.7115	4.73939
	Rpl21	TNGKEPELLEPIPYEFMA	OS=Mus musculus GN=Rpl21	1.47434e-07	3.92187e-06	0.181712	26.6008	4.7334
	Kpna1	LVELLMHNDYK	OS=Mus musculus GN=Kpna1	1.47434e-07	3.92175e-06	0.415955	26.6	4.73335
	Ap2a1	ILVAGDSMDSVK	OS=Mus musculus GN=Ap2a1	1.47434e-07	3.9044e-06	0.413439	26.4823	4.72696
	Ezr	SGYLSSER	OS=Mus musculus GN=Ezr	1.47434e-07	3.88732e-06	0.198593	26.3664	4.72063
	Yars	FVPKEELQDR	OS=Mus musculus GN=Yars	1.47434e-07	3.86713e-06	0.413345	26.2295	4.71312
	Hnrnpa2b1	GFGFVTFSSMAEVDAAMAAR	OS=Mus musculus GN=Hnrnpa2b1	1.47434e-07	3.77652e-06	0.178299	25.6149	4.67891
	Pdxdc1	ILVEDELSSPVVVFR	OS=Mus musculus GN=Pdxdc1	1.47434e-07	3.77006e-06	0.415158	25.5711	4.67644
	Pdia4	EVSQPDWTPPPEVTLSLTK	OS=Mus musculus GN=Pdia4	1.47434e-07	3.74765e-06	0.204918	25.4191	4.66784
	Cdc40	LWDTETGQCISR	OS=Mus musculus GN=Cdc40	1.47434e-07	3.7321e-06	0.412991	25.3136	4.66184
	Actn1	ISIEMHGTLEDQLSHLR	OS=Mus musculus GN=Actn1	1.47434e-07	3.73134e-06	0.415596	25.3085	4.66155
	Get4	GDYYEAHQMYR	OS=Mus musculus GN=Get4	1.47434e-07	3.72051e-06	0.178172	25.235	4.65735
	Snrnp200	ATLPNYEDVATFLR	OS=Mus musculus GN=Snrnp200	1.47434e-07	3.71869e-06	0.230932	25.2227	4.65665
	Lta4h	ASMHPVTAMLVGR	OS=Mus musculus GN=Lta4h	1.47434e-07	3.70714e-06	0.412922	25.1443	4.65216
	Serbp1	FDQLFDDESDPFEVLK	OS=Mus musculus GN=Serbp1	1.47434e-07	3.70619e-06	0.236279	25.1379	4.65179
	GAPDH	MTTVHAITATQK	OS=Mus musculus GN=GAPDH	1.47434e-07	3.69826e-06	0.412897	25.0841	4.6487
	Ube2m	GGYIGSTYFER	OS=Mus musculus GN=Ube2m	1.47434e-07	3.68761e-06	0.412868	25.0119	4.64454
	Fnbp4	KLQDAAEQLKQ	OS=Mus musculus GN=Fnbp4	3.04906e-06	7.60896e-05	0.437318	24.9551	4.64126
	Mcm5	GVVCIDEFDK	OS=Mus musculus GN=Mcm5	1.47434e-07	3.67254e-06	0.179949	24.9097	4.63863
	Qdpr	EGGLLTLAGAK	OS=Mus musculus GN=Qdpr	1.47434e-07	3.64789e-06	0.415426	24.7424	4.62892
	Rnf213	ELIESAEGICSSDR	OS=Mus musculus GN=Rnf213	1.47434e-07	3.63963e-06	0.177446	24.6864	4.62565
	Eif3b	SPSQEPSAPGK	OS=Mus musculus GN=Eif3b	1.47434e-07	3.62244e-06	0.191789	24.5699	4.61882
	Map4	ARPSTLPAR	OS=Mus musculus GN=Map4	1.47434e-07	3.62144e-06	0.212963	24.563	4.61842
	Eprs	IDMSSNNGCMR	OS=Mus musculus GN=Eprs	1.47434e-07	3.61892e-06	0.191747	24.5459	4.61741
	Fkbp4	LYANMFER	OS=Mus musculus GN=Fkbp4	1.47434e-07	3.60868e-06	0.1793	24.4765	4.61333
	Trove2	MTANSVLEPGNSEVSLICEK	OS=Mus musculus GN=Trove2	1.47434e-07	3.60506e-06	0.18543	24.452	4.61188
	FAM120A	SLTTSQYLMHEVAK	OS=Mus musculus GN=FAM120A	1.47434e-07	3.59477e-06	0.182367	24.3821	4.60775
	Qars	GFHQVPFASTVFIER	OS=Mus musculus GN=Qars	1.47434e-07	3.58544e-06	0.210566	24.3189	4.60401
	Anp32e	ELEFLSMANVELSSLAR	OS=Mus musculus GN=Anp32e	1.47434e-07	3.55108e-06	0.414671	24.0858	4.59011
	Ttc27	NLELNDDTVLNEIK	OS=Mus musculus GN=Ttc27	1.47434e-07	3.54484e-06	0.414656	24.0435	4.58758
	Sugt1	LVGEIKEEEKNEK	OS=Mus musculus GN=Sugt1	1.47434e-07	3.53817e-06	0.199233	23.9982	4.58486
	Snrpa1	KGGPSAGDVEAIK	OS=Mus musculus GN=Snrpa1	1.47434e-07	3.52707e-06	0.0135518	23.923	4.58033
	Rpl24	MKVELCSFSGYK	OS=Mus musculus GN=Rpl24	1.47434e-07	3.50699e-06	0.206094	23.7868	4.57209
	Myg1	LASCDIVVDVGGEYNPQSHR	OS=Mus musculus GN=Myg1	1.47434e-07	3.50499e-06	0.412329	23.7732	4.57126
	Pafah1b3	LLAQDQGQGIPLPETAS	OS=Mus musculus GN=Pafah1b3	1.47434e-07	3.50432e-06	0.412327	23.7687	4.57099
	Eprs	GSQFGQSCCLR	OS=Mus musculus GN=Eprs	1.47434e-07	3.46556e-06	0.200592	23.5058	4.55495
	Ppwd1	VMQLALFQGIAK	OS=Mus musculus GN=Ppwd1	1.47434e-07	3.46468e-06	0.205425	23.4998	4.55457
	Rpl8	VKLPSGSK	OS=Mus musculus GN=Rpl8	6.45574e-07	1.51422e-05	0.415412	23.4554	4.55185
	Ola1	LKPEYDIMCK	OS=Mus musculus GN=Ola1	1.47434e-07	3.44219e-06	0.412129	23.3473	4.54518
	Wdr3	FWDFELVTDK	OS=Mus musculus GN=Wdr3	1.47434e-07	3.44135e-06	0.185685	23.3415	4.54483
	Lars	TDIGDTMVYLVH	OS=Mus musculus GN=Lars	1.47434e-07	3.43764e-06	0.176606	23.3164	4.54327
	Mcm7	YGTQLVHLAHR	OS=Mus musculus GN=Mcm7	1.47434e-07	3.42991e-06	0.181148	23.264	4.54003
	Smc3	ELGSLPQEAFEK	OS=Mus musculus GN=Smc3	1.47434e-07	3.4018e-06	0.414875	23.0733	4.52815
	Eif3l	VSSDVIDQK	OS=Mus musculus GN=Eif3l	1.47434e-07	3.3856e-06	0.411943	22.9635	4.52127
	Plod2	IVGPEENLSQAEAR	OS=Mus musculus GN=Plod2	1.47434e-07	3.369e-06	0.184022	22.8508	4.51417
	Aacs	QQVALFAAAMR	OS=Mus musculus GN=Aacs	1.47434e-07	3.34966e-06	0.411821	22.7196	4.50587
	Pdcd6ip	FLTALAQDGVINEEALSVTELDR	OS=Mus musculus GN=Pdcd6ip	1.47434e-07	3.32602e-06	0.411739	22.5593	4.49565
	Mcm7	MVDIVEKEDVNEAIR	OS=Mus musculus GN=Mcm7	7.98589e-07	1.78906e-05	0.435543	22.4028	4.4856
	Pdhb	VFLLGEEVAQYDGAYK	OS=Mus musculus GN=Pdhb	1.47434e-07	3.30065e-06	0.179676	22.3872	4.4846
	Qdpr	GAVHQLCQSLAGK	OS=Mus musculus GN=Qdpr	1.47434e-07	3.29635e-06	0.19315	22.3581	4.48272
	Acy1	SVSIQYLEAVR	OS=Mus musculus GN=Acy1	1.47434e-07	3.27689e-06	0.414561	22.2261	4.47418
	Smarca5	WGRDDIENIAR	OS=Mus musculus GN=Smarca5	1.47434e-07	3.27086e-06	0.0179163	22.1852	4.47152
	Rprd1b	SVYGGEFIQQLK	OS=Mus musculus GN=Rprd1b	1.47434e-07	3.26944e-06	0.411539	22.1756	4.4709
	Pa2g4	GDAMIMEETGK	OS=Mus musculus GN=Pa2g4	1.47434e-07	3.26079e-06	0.411508	22.1169	4.46707
	Atp5a1	EIVTNFLAGFEP	OS=Mus musculus GN=Atp5a1	1.47434e-07	3.25357e-06	0.411481	22.0679	4.46388
	Hsp90aa1	MIEPIDEYCVQQLK	OS=Mus musculus GN=Hsp90aa1	1.47434e-07	3.24663e-06	0.18806	22.0208	4.4608
	Ap2a1	LEPNAQAQMYR	OS=Mus musculus GN=Ap2a1	1.47434e-07	3.21408e-06	0.202277	21.8001	4.44626
	Ddah1	TPEEYPESAK	OS=Mus musculus GN=Ddah1	1.47434e-07	3.20897e-06	0.411316	21.7654	4.44397
	Serpinb6a	AFVEVNEEGTEAAAATAGMMTVR	OS=Mus musculus GN=Serpinb6a	1.47434e-07	3.14007e-06	0.411052	21.2981	4.41265
	Hmgb1	EKGKFEDMAK	OS=Mus musculus GN=Hmgb1	1.47434e-07	3.13774e-06	0.411042	21.2823	4.41158
	Fxr1	DVIEEHGPSEK	OS=Mus musculus GN=Fxr1	1.47434e-07	3.12727e-06	0.21959	21.2113	4.40676
	Hspa4	EMLGLYTENEGK	OS=Mus musculus GN=Hspa4	1.47434e-07	3.12678e-06	0.413522	21.2079	4.40653
	Copg1	VFNETPINPR	OS=Mus musculus GN=Copg1	1.47434e-07	3.11003e-06	0.176288	21.0943	4.39878
	Ddb1	KTEPATGFIDGDLIESFLDISRPK	OS=Mus musculus GN=Ddb1	1.47434e-07	3.08804e-06	0.410843	20.9452	4.38855
	Camk2d	ESTESSNTTIEDEDVK	OS=Mus musculus GN=Camk2d	1.47434e-07	3.08391e-06	0.413387	20.9172	4.38662
	Ahnak	AGAISASGPELEGAGHSK	OS=Mus musculus GN=Ahnak	1.47434e-07	3.07149e-06	0.196747	20.8329	4.38079
	Fasn	YNGTLNLDR	OS=Mus musculus GN=Fasn	1.47434e-07	3.05975e-06	0.41331	20.7533	4.37527
	Actn4	MAPYQGPDAAPGALDYK	OS=Mus musculus GN=Actn4	1.47434e-07	3.04461e-06	0.413906	20.6506	4.36811
	Hnrnpll	QHSVVPSQIFELEDGTSSYK	OS=Mus musculus GN=Hnrnpll	1.47434e-07	3.04157e-06	0.41325	20.63	4.36667
	Fam49b	FTNEETVSFCLR	OS=Mus musculus GN=Fam49b	1.47434e-07	3.03439e-06	0.413874	20.5813	4.36326
	Dync1h1	SSLQSQCLNEVLK	OS=Mus musculus GN=Dync1h1	1.47434e-07	3.02886e-06	0.413857	20.5438	4.36063
	Dhx15	VAAMSVAQR	OS=Mus musculus GN=Dhx15	1.47434e-07	3.01665e-06	0.250278	20.4609	4.3548
	Cndp2	DVGAETLLHSCK	OS=Mus musculus GN=Cndp2	1.47434e-07	3.00945e-06	0.413143	20.4122	4.35136
	Dync1h1	LGGSPFGPAGTGK	OS=Mus musculus GN=Dync1h1	1.95247e-06	3.98407e-05	0.196157	20.4053	4.35088
	Cmpk1	YGYTHLSAGELLR	OS=Mus musculus GN=Cmpk1	1.47434e-07	2.9805e-06	0.175498	20.2158	4.33741
	Eno3	FMIELDGTENK	OS=Mus musculus GN=Eno3	1.47434e-07	2.97044e-06	0.413011	20.1475	4.33253
	Hk1	GDFLALDLGGTNFR	OS=Mus musculus GN=Hk1	1.47434e-07	2.94694e-06	0.412929	19.9882	4.32107
	Srp72	VDVEALENSPGATYIR	OS=Mus musculus GN=Srp72	1.47434e-07	2.942e-06	0.0260282	19.9547	4.31865
	Nudcd2	AQDIQCGLQSR	OS=Mus musculus GN=Nudcd2	1.47434e-07	2.93526e-06	0.410186	19.9089	4.31534
	Nup93	ALITFAGMIPYR	OS=Mus musculus GN=Nup93	1.47434e-07	2.93414e-06	0.180512	19.9013	4.31479
	Umps	RGSDVIIVGR	OS=Mus musculus GN=Umps	1.47434e-07	2.93326e-06	0.410177	19.8954	4.31436
	Mat2a	TAAYGHFGR	OS=Mus musculus GN=Mat2a	1.47434e-07	2.92907e-06	0.198505	19.8669	4.3123
	Rad23b	TLQQQTFK	OS=Mus musculus GN=Rad23b	1.47434e-07	2.92641e-06	0.255302	19.8489	4.31099
	Snrnp200	SPTLYGISHDDLK	OS=Mus musculus GN=Snrnp200	1.47434e-07	2.92359e-06	0.412846	19.8297	4.30959
	Ddx5	TGTAYTFFTPNNIK	OS=Mus musculus GN=Ddx5	1.47434e-07	2.92172e-06	0.410124	19.8171	4.30867
	Arpc5l	SSEIEQAVQSLDR	OS=Mus musculus GN=Arpc5l	1.47434e-07	2.91469e-06	0.412814	19.7694	4.3052
	Stk3	AGNILLNTEGHAK	OS=Mus musculus GN=Stk3	1.47434e-07	2.9136e-06	0.176573	19.762	4.30466
	Ipo4	SFAVGTLAESIQGLGTASAQFVSR	OS=Mus musculus GN=Ipo4	1.47434e-07	2.90786e-06	0.41006	19.723	4.30181
	Nsf	LFADAEEEQR	OS=Mus musculus GN=Nsf	1.47434e-07	2.90767e-06	0.175124	19.7218	4.30172
	Snrnp200	DLLPYGFAIHHAGMTR	OS=Mus musculus GN=Snrnp200	1.47434e-07	2.89931e-06	0.41002	19.6651	4.29757
	Padi4	VMGPNFGYVTR	OS=Mus musculus GN=Padi4	1.47434e-07	2.89232e-06	0.409988	19.6177	4.29408
	Txnrd1	VVGFHVLGPNAGEVTQGFAAALK	OS=Mus musculus GN=Txnrd1	1.47434e-07	2.87936e-06	0.413371	19.5297	4.2876
	Psmd2	LGSIFGLGLAYAGSNR	OS=Mus musculus GN=Psmd2	1.47434e-07	2.87272e-06	0.413348	19.4848	4.28427
	Ccar1	SCALAEDPQDLR	OS=Mus musculus GN=Ccar1	1.47434e-07	2.87078e-06	0.177237	19.4716	4.2833
	Itga2	FGIAVLGYLNR	OS=Mus musculus GN=Itga2	1.47434e-07	2.85335e-06	0.188328	19.3533	4.27451
	Ranbp3	ITATDAEDQGVK	OS=Mus musculus GN=Ranbp3	1.47434e-07	2.83862e-06	0.209761	19.2534	4.26704
	Wdr77	SDGSLLLGVSSLSGR	OS=Mus musculus GN=Wdr77	1.47434e-07	2.82964e-06	0.409687	19.1925	4.26247
	Uba2	MCLAADVPLIESGTAGYLGQVTTIK	OS=Mus musculus GN=Uba2	1.47434e-07	2.79136e-06	0.409496	18.9329	4.24282
	Hnrnpul1	NYILDQTNVYGSAQR	OS=Mus musculus GN=Hnrnpul1	1.47434e-07	2.78148e-06	0.409446	18.8659	4.23771
	Ncapg	FTEGNILEFLHR	OS=Mus musculus GN=Ncapg	1.47434e-07	2.77158e-06	0.412985	18.7987	4.23256
	Krt8	ASLEAAIADAEQR	OS=Mus musculus GN=Krt8	1.47434e-07	2.76645e-06	0.41225	18.7639	4.22989
	Cluh	DQEQSVIYGSIDFGK	OS=Mus musculus GN=Cluh	1.47434e-07	2.75749e-06	0.412932	18.7031	4.22521
	Rbpj	LVCSVTGMALPR	OS=Mus musculus GN=Rbpj	1.47434e-07	2.75375e-06	0.412918	18.6778	4.22325
	Elmo2	LLDLENIQIPEAPPPVPK	OS=Mus musculus GN=Elmo2	1.47434e-07	2.72786e-06	0.18117	18.5022	4.20962
	Iap	KIQQAFPVFEGAEGGR	OS=Mus musculus GN=Iap	1.47434e-07	2.71023e-06	0.412751	18.3826	4.20027
	Cfl1	KEDLVFIFWAPENAPLK	OS=Mus musculus GN=Cfl1	1.47434e-07	2.69705e-06	0.409001	18.2932	4.19324
	Ikbkap	AEQGTVLIGSER	OS=Mus musculus GN=Ikbkap	1.47434e-07	2.69542e-06	0.295339	18.2821	4.19236
	Myo1c	QLLLTPSAVVIVEDAK	OS=Mus musculus GN=Myo1c	1.47434e-07	2.68971e-06	0.180955	18.2434	4.18931
	Actn1	VEQIAAIAQELNELDYYDSPSVNAR	OS=Mus musculus GN=Actn1	1.47434e-07	2.67673e-06	0.411876	18.1554	4.18233
	Tnpo1	SHAVACVNQFIISR	OS=Mus musculus GN=Tnpo1	1.47434e-07	2.66038e-06	0.199899	18.0445	4.17349
	Prdx6	FHDFLGDSWGILFSHPR	OS=Mus musculus GN=Prdx6	1.47434e-07	2.65046e-06	0.246535	17.9772	4.1681
	Birc6	VLDLSNFEILAK	OS=Mus musculus GN=Birc6	1.47434e-07	2.64259e-06	0.204891	17.9238	4.16381
	Hbb-b2	LHVDPENFR	OS=Mus musculus GN=Hbb-b2	1.47434e-07	2.63426e-06	0.41169	17.8673	4.15925
	Vps4a	IYIPLPEEAAR	OS=Mus musculus GN=Vps4a	1.47434e-07	2.61961e-06	0.408566	17.768	4.15121
	Asns	FSSYYLSLPPDMR	OS=Mus musculus GN=Asns	1.47434e-07	2.6117e-06	0.411588	17.7143	4.14684
	Brox	ATAPVSFNYYGMITGPPASK	OS=Mus musculus GN=Brox	1.47434e-07	2.61106e-06	0.408516	17.71	4.14649
	Mcm6	TSILAAANPVSGHYDR	OS=Mus musculus GN=Mcm6	1.47434e-07	2.6037e-06	0.412316	17.66	4.14242
	Tln1	IPEALAGPPNDFGLFLSDDDPK	OS=Mus musculus GN=Tln1	1.47434e-07	2.60307e-06	0.411549	17.6558	4.14207
	Mapk14	DLKPSNLAVNEDCELK	OS=Mus musculus GN=Mapk14	1.47434e-07	2.60052e-06	0.177725	17.6385	4.14065
	Cops7b	ESLPELSVAQQNK	OS=Mus musculus GN=Cops7b	1.47434e-07	2.59635e-06	0.185056	17.6102	4.13834
	Eif3g	VTNLSEDTR	OS=Mus musculus GN=Eif3g	1.47434e-07	2.59483e-06	0.174245	17.5999	4.13749
	Plec	NLVDNITGQR	OS=Mus musculus GN=Plec	1.47434e-07	2.5885e-06	0.412251	17.5569	4.13397
	Pebp1	VLTPTQVMNR	OS=Mus musculus GN=Pebp1	1.47434e-07	2.58444e-06	0.408359	17.5294	4.1317
	Tceb1	EHALTSGTIK	OS=Mus musculus GN=Tceb1	1.47434e-07	2.58186e-06	0.412222	17.512	4.13027
	Cluh	GAMAVIDGNVMAINPSEETK	OS=Mus musculus GN=Cluh	1.47434e-07	2.57254e-06	0.173202	17.4487	4.12505
	Psmd2	VGQAVDVVGQAGK	OS=Mus musculus GN=Psmd2	1.47434e-07	2.56901e-06	0.412166	17.4248	4.12307
	Cdk6	DLKPQNILVTSSGQIK	OS=Mus musculus GN=Cdk6	1.47434e-07	2.56016e-06	0.175502	17.3647	4.11809
	Nars	EPFPTIYVDSQKENER	OS=Mus musculus GN=Nars	1.47434e-07	2.54953e-06	0.179155	17.2926	4.11209
	Pacsin2	HLDLSNVASYK	OS=Mus musculus GN=Pacsin2	1.47434e-07	2.53373e-06	0.40805	17.1855	4.10312
	Naa50	LAYFNDIAVGAVCCR	OS=Mus musculus GN=Naa50	1.47434e-07	2.52211e-06	0.411165	17.1067	4.09649
	Ap1m1	TISFIPPDGEFELMSYR	OS=Mus musculus GN=Ap1m1	1.47434e-07	2.51829e-06	0.275569	17.0807	4.0943
	Sf3b3	WVTTASLLDYDTVAGADK	OS=Mus musculus GN=Sf3b3	1.47434e-07	2.50611e-06	0.407876	16.9981	4.0873
	Sptan1	TALLELWELR	OS=Mus musculus GN=Sptan1	1.47434e-07	2.49978e-06	0.407835	16.9552	4.08366
	Capn2	PSFPALPSSLGYK	OS=Mus musculus GN=Capn2	1.47434e-07	2.49954e-06	0.0452044	16.9536	4.08352
	Suclg1	MGHAGAIIAGGK	OS=Mus musculus GN=Suclg1	1.47434e-07	2.46746e-06	0.411701	16.736	4.06488
	Nrd1	LVAGEHGLIIR	OS=Mus musculus GN=Nrd1	1.47434e-07	2.46221e-06	0.411676	16.7003	4.06181
	Fasn	YHGNVTLLR	OS=Mus musculus GN=Fasn	1.47434e-07	2.46173e-06	0.407587	16.6971	4.06153
	Mcm4	DYIAYAHSTIMPR	OS=Mus musculus GN=Mcm4	1.47434e-07	2.44576e-06	0.411596	16.5888	4.05214
	Aco2	DINQEVYNFLATAGAK	OS=Mus musculus GN=Aco2	1.47434e-07	2.43492e-06	0.410721	16.5153	4.04573
	Psmc3	MSTEEIVQR	OS=Mus musculus GN=Psmc3	1.47434e-07	2.43011e-06	0.407374	16.4826	4.04287
	Rad23b	ILSDDTALK	OS=Mus musculus GN=Rad23b	1.47434e-07	2.40837e-06	0.410579	16.3352	4.02991
	Gm9774	RLFFWMQEPK	OS=Mus musculus GN=Gm9774	1.47434e-07	2.40403e-06	0.411389	16.3058	4.02731
	Flnb	DGTYAVTYIPDK	OS=Mus musculus GN=Flnb	1.47434e-07	2.39105e-06	0.407103	16.2177	4.0195
	Capn2	NECLEAGALFQDPSFPALPSSLGYK	OS=Mus musculus GN=Capn2	1.47434e-07	2.39094e-06	0.407102	16.217	4.01943
	Psme1	LEGFHTQISK	OS=Mus musculus GN=Psme1	1.47434e-07	2.38451e-06	0.407057	16.1733	4.01555
	Nenf	ELEALDDVFSK	OS=Mus musculus GN=Nenf	1.47434e-07	2.38137e-06	0.411273	16.1521	4.01365
	Ilf3	LFPDTPLALEANK	OS=Mus musculus GN=Ilf3	1.47434e-07	2.37681e-06	0.411249	16.1212	4.01088
	Gid8	VWSEVNQAVLDYENR	OS=Mus musculus GN=Gid8	1.47434e-07	2.37254e-06	0.410382	16.0922	4.00829
	Itga2	IIFNLNDFETK	OS=Mus musculus GN=Itga2	1.47434e-07	2.36803e-06	0.410356	16.0616	4.00554
	Zcchc8	GTPPLTPSDSPQAR	OS=Mus musculus GN=Zcchc8	1.47434e-07	2.35263e-06	0.411123	15.9571	3.99613
	Gart	LAQSPQVK	OS=Mus musculus GN=Gart	1.47434e-07	2.35163e-06	0.182784	15.9504	3.99552
	Ndufs1	VAVTPPGLAR	OS=Mus musculus GN=Ndufs1	1.47434e-07	2.34866e-06	0.18557	15.9302	3.99369
	Sec23b	AESEEGPDVLR	OS=Mus musculus GN=Sec23b	1.47434e-07	2.3442e-06	0.411078	15.9	3.99095
	Idh1	TVEAEAAHGTVTR	OS=Mus musculus GN=Idh1	1.47434e-07	2.32559e-06	0.406626	15.7737	3.97945
	Sars	DPGLVDQLVK	OS=Mus musculus GN=Sars	1.47434e-07	2.31167e-06	0.186779	15.6793	3.97079
	Upf1	TFAVDETSVSGYIYHK	OS=Mus musculus GN=Upf1	1.47434e-07	2.30706e-06	0.406486	15.6481	3.96791
	Slk	RLVVTGAEAR	OS=Mus musculus GN=Slk	1.47434e-07	2.30573e-06	0.406476	15.639	3.96708
	Rangap1	GAVAIADAVR	OS=Mus musculus GN=Rangap1	1.47434e-07	2.29902e-06	0.282501	15.5935	3.96287
	Serpinb6a	NVFLSPMSISSALAMVFMGAK	OS=Mus musculus GN=Serpinb6a	1.47434e-07	2.29101e-06	0.410786	15.5392	3.95784
	Aldoc	TPSALAILENANVLAR	OS=Mus musculus GN=Aldoc	1.47434e-07	2.28576e-06	0.406322	15.5036	3.95453
	Hnrnpc	QADLSFSSPVEMK	OS=Mus musculus GN=Hnrnpc	6.17885e-07	9.51484e-06	0.154474	15.399	3.94477
	Sptan1	LDETGNLMISEGHFASETIR	OS=Mus musculus GN=Sptan1	1.47434e-07	2.2627e-06	0.172802	15.3472	3.9399
	Hspa4l	FITPEDMNK	OS=Mus musculus GN=Hspa4l	1.47434e-07	2.25867e-06	0.410602	15.3199	3.93733
	Serpinb6a	NEEKPVQMMFK	OS=Mus musculus GN=Serpinb6a	1.47434e-07	2.2581e-06	0.186779	15.3159	3.93696
	Iqgap1	EQLWLANEGLITK	OS=Mus musculus GN=Iqgap1	1.47434e-07	2.25124e-06	0.409663	15.2694	3.93257
	Slk	RFEQEMLSK	OS=Mus musculus GN=Slk	1.47434e-07	2.25024e-06	0.410553	15.2627	3.93194
	Rpl6	EKYEITEQR	OS=Mus musculus GN=Rpl6	1.47434e-07	2.24782e-06	0.40602	15.2462	3.93038
	Arpc2	DTDAAVGDNIGYITF	OS=Mus musculus GN=Arpc2	1.46695e-05	0.000222943	1.51427e-05	15.1977	3.92578
	Hnrnpm	ADILEDKDGK	OS=Mus musculus GN=Hnrnpm	9.68905e-07	1.46023e-05	0.0528984	15.0709	3.91369
	Ptpn2	MGLIQTPDQLR	OS=Mus musculus GN=Ptpn2	1.47434e-07	2.21418e-06	0.410339	15.0181	3.90863
	Lpp	MVIPQQPPLTATK	OS=Mus musculus GN=Lpp	1.47434e-07	2.21375e-06	0.40574	15.0152	3.90835
	Gls	SSSPSEILQELGK	OS=Mus musculus GN=Gls	1.47434e-07	2.21142e-06	0.409408	14.9994	3.90683
	Btaf1	AVTLAVQPR	OS=Mus musculus GN=Btaf1	1.47434e-07	2.20931e-06	0.171352	14.985	3.90545
	Ecm29	HSVATAADLELK	OS=Mus musculus GN=Ecm29	1.47434e-07	2.19152e-06	0.4102	14.8644	3.89379
	Snd1	VLPAQATEYAFAFIQVPQDEDAR	OS=Mus musculus GN=Snd1	1.47434e-07	2.18358e-06	0.405484	14.8105	3.88855
	Canx	KPEDWDERPK	OS=Mus musculus GN=Canx	9.72462e-07	1.41902e-05	0.176491	14.592	3.8671
	Eif3g	EDLNCQEEEDPMNK	OS=Mus musculus GN=Eif3g	1.47434e-07	2.14838e-06	0.408984	14.5718	3.8651
	Eprs	VAQIPFCGEIDCEDWIK	OS=Mus musculus GN=Eprs	1.47434e-07	2.14746e-06	0.177231	14.5655	3.86448
	Eif1a	AYGELPEHAK	OS=Mus musculus GN=Eif1a	1.47434e-07	2.14482e-06	0.409904	14.5476	3.86271
	Basp1	KTEAPAAAGPEAK	OS=Mus musculus GN=Basp1	1.47434e-07	2.1436e-06	0.172081	14.5394	3.86189
	Trappc4	EVLEYLGNPANYPVSIR	OS=Mus musculus GN=Trappc4	1.47434e-07	2.13952e-06	0.1707	14.5117	3.85914
	Zfp622	ILECDDETMELILPSGAR	OS=Mus musculus GN=Zfp622	1.47434e-07	2.13736e-06	0.409856	14.497	3.85768
	Heatr3	FIAYQETVEK	OS=Mus musculus GN=Heatr3	1.47434e-07	2.12533e-06	0.409777	14.4155	3.84954
	Trap1	AFLEALQNQAETSSK	OS=Mus musculus GN=Trap1	1.47434e-07	2.11825e-06	0.408772	14.3674	3.84473
	Kiaa0020	VLLYLMSPR	OS=Mus musculus GN=Kiaa0020	1.47434e-07	2.11137e-06	0.180903	14.3208	3.84004
	Lmna	LADALQELR	OS=Mus musculus GN=Lmna	1.47434e-07	2.0919e-06	0.409552	14.1887	3.82667
	Nudt5	HLVTSEELISEGK	OS=Mus musculus GN=Nudt5	1.47434e-07	2.0916e-06	0.404654	14.1866	3.82646
	Hnrnpul1	WDVLIQQATQCLNR	OS=Mus musculus GN=Hnrnpul1	1.47434e-07	2.08747e-06	0.409522	14.1587	3.82361
	Rab7	NNIPYFETSAK	OS=Mus musculus GN=Rab7	1.47434e-07	2.08167e-06	0.409482	14.1193	3.8196
	Fasn	VSVHIIEGDHR	OS=Mus musculus GN=Fasn	1.47434e-07	2.07987e-06	0.409469	14.1071	3.81835
	Ppig	VVFELFSDVCPK	OS=Mus musculus GN=Ppig	1.47434e-07	2.05077e-06	0.404259	13.9097	3.79802
	Ilf3	FVMEVEVDGQK	OS=Mus musculus GN=Ilf3	1.47434e-07	2.047e-06	0.404221	13.8841	3.79536
	Rap1gds1	MLSAGVTETVLK	OS=Mus musculus GN=Rap1gds1	1.47434e-07	2.04616e-06	0.409231	13.8784	3.79477
	Rps5	KAQCPIVER	OS=Mus musculus GN=Rps5	8.69386e-07	1.20005e-05	0.435005	13.8034	3.78695
	Myo1e	LSQTPESLDFLK	OS=Mus musculus GN=Myo1e	1.47434e-07	2.03193e-06	0.409128	13.7819	3.7847
	Cct3	IVSRPEELR	OS=Mus musculus GN=Cct3	1.47434e-07	2.02907e-06	0.408102	13.7625	3.78267
	Ppp4r1	IDLDKELQQDPEER	OS=Mus musculus GN=Ppp4r1	1.47434e-07	2.01937e-06	0.403943	13.6967	3.77576
	Rps19	KLTPQGQR	OS=Mus musculus GN=Rps19	1.47434e-07	2.01859e-06	0.171825	13.6915	3.77521
	Rae1	SSNPMMVLQLPER	OS=Mus musculus GN=Rae1	1.47434e-07	2.01138e-06	0.403861	13.6426	3.77004
	Naca	IEDLSQQAQLAAAEK	OS=Mus musculus GN=Naca	1.47434e-07	2.00761e-06	0.403822	13.617	3.76733
	Kars	QLFEEQAK	OS=Mus musculus GN=Kars	9.23362e-07	1.25035e-05	0.199471	13.5413	3.75929
	Flnb	EATTDFTVDSRPLTQVGGDHIK	OS=Mus musculus GN=Flnb	1.47434e-07	1.99213e-06	0.408832	13.512	3.75617
	Sptan1	MQHNLEQQIQAR	OS=Mus musculus GN=Sptan1	1.47434e-07	1.97433e-06	0.17168	13.3913	3.74322
	Ctsz	NSWGEPWGEK	OS=Mus musculus GN=Ctsz	1.47434e-07	1.97197e-06	0.186829	13.3752	3.74149
	Alyref	QYNGVPLDGR	OS=Mus musculus GN=Alyref	1.47434e-07	1.96748e-06	0.407601	13.3448	3.73821
	Copa	GITGVDLFGTTDAVVK	OS=Mus musculus GN=Copa	1.47434e-07	1.96456e-06	0.407576	13.325	3.73606
	Elac2	DAGAALYVFSEYNR	OS=Mus musculus GN=Elac2	1.47434e-07	1.96279e-06	0.403346	13.3129	3.73476
	Rpl31	LYTLVTYVPVTTFK	OS=Mus musculus GN=Rpl31	3.303e-07	4.39477e-06	0.433234	13.3054	3.73394
	Ptges3	KGESGQSWPR	OS=Mus musculus GN=Ptges3	2.67906e-06	3.53084e-05	0.170139	13.1794	3.72022
	Ide	FIIQSEKPPHYLESR	OS=Mus musculus GN=Ide	1.47434e-07	1.94215e-06	0.403118	13.173	3.71951
	Dync1li1	SVSPIPAGSK	OS=Mus musculus GN=Dync1li1	7.27462e-07	9.55455e-06	0.178105	13.1341	3.71524
	Pcbp1	QVTITGSAASISLAQYLINAR	OS=Mus musculus GN=Pcbp1	1.47434e-07	1.93538e-06	0.403043	13.1271	3.71447
	Cdc37	NMPWNVDTLSK	OS=Mus musculus GN=Cdc37	1.47434e-07	1.93245e-06	0.4073	13.1072	3.71228
	Sacm1l	TNVIQSLLAR	OS=Mus musculus GN=Sacm1l	1.47434e-07	1.9308e-06	0.224319	13.096	3.71105
	Mif	MPMFIVNTNVPR	OS=Mus musculus GN=Mif	1.47434e-07	1.91559e-06	0.407151	12.9928	3.69964
	Ppid	TLENVEVNGEKPAK	OS=Mus musculus GN=Ppid	1.47434e-07	1.9037e-06	0.408123	12.9122	3.69066
	Slfn9	SYPDLIIYAGEVTLGEK	OS=Mus musculus GN=Slfn9	1.47434e-07	1.89211e-06	0.402544	12.8336	3.68185
	Tubb6	ISVYYNESSSK	OS=Mus musculus GN=Tubb6	1.47434e-07	1.89056e-06	0.402526	12.823	3.68067
	Eftud2	DSIVQGFQWGTR	OS=Mus musculus GN=Eftud2	1.47434e-07	1.88602e-06	0.407973	12.7922	3.6772
	Ikbkap	SSGNSANDLANVAVIDGNR	OS=Mus musculus GN=Ikbkap	1.47434e-07	1.88021e-06	0.407923	12.7529	3.67275
	Msh6	SLVLVDELGR	OS=Mus musculus GN=Msh6	1.47434e-07	1.87869e-06	0.402384	12.7425	3.67158
	Pdia3	RLAPEYEAAATR	OS=Mus musculus GN=Pdia3	1.47434e-07	1.87636e-06	0.402356	12.7267	3.66979
	Nfkb2	SPECLDLLVDCGAEVEAPER	OS=Mus musculus GN=Nfkb2	1.47434e-07	1.87539e-06	0.171534	12.7202	3.66905
	Cdk11b	TLMIQLLSGVK	OS=Mus musculus GN=Cdk11b	1.47434e-07	1.87525e-06	0.402343	12.7192	3.66894
	Guk1	ICVLDVDLQGVR	OS=Mus musculus GN=Guk1	1.47434e-07	1.8678e-06	0.00359724	12.6687	3.66319
	Plec	DTHDQLSEPSEVR	OS=Mus musculus GN=Plec	1.47434e-07	1.85661e-06	0.402116	12.5928	3.65452
	Anln	VINDIFSDVLEEGELDVEK	OS=Mus musculus GN=Anln	1.47434e-07	1.83928e-06	0.406438	12.4752	3.64099
	Dis3	AESPDFPYLNTLLR	OS=Mus musculus GN=Dis3	1.47434e-07	1.83876e-06	0.407555	12.4717	3.64059
	Aim1	SVQAVPDGGAAPVACPEPK	OS=Mus musculus GN=Aim1	1.47434e-07	1.83755e-06	0.406421	12.4635	3.63964
	Gapvd1	LLQQLAMTGTEEGDPR	OS=Mus musculus GN=Gapvd1	1.47434e-07	1.82377e-06	0.401703	12.37	3.62878
	Farsb	AQGASDVVLYK	OS=Mus musculus GN=Farsb	1.47434e-07	1.82251e-06	0.254088	12.3615	3.62778
	Actn1	IMSIVDPNR	OS=Mus musculus GN=Actn1	1.47434e-07	1.82149e-06	0.407397	12.3546	3.62697
	Tubb6	VAVCDIPPR	OS=Mus musculus GN=Tubb6	1.47434e-07	1.82066e-06	0.401663	12.3489	3.62632
	Rps12	QAHLCVLASNCDEPMYVK	OS=Mus musculus GN=Rps12	1.47434e-07	1.81776e-06	0.407362	12.3293	3.62401
	Eif2b1	AQNKPFYVVAESFK	OS=Mus musculus GN=Eif2b1	1.47434e-07	1.80663e-06	0.406113	12.2538	3.61516
	Dnph1	FQVWDYAEEEVETMLHR	OS=Mus musculus GN=Dnph1	1.47434e-07	1.7991e-06	0.407186	12.2027	3.60913
	Flna	PQSFQVDTSK	OS=Mus musculus GN=Flna	1.47434e-07	1.79048e-06	0.401267	12.1443	3.6022
	Hadha	MVGVPAAFDMMLTGR	OS=Mus musculus GN=Hadha	1.47434e-07	1.78349e-06	0.401173	12.0968	3.59656
	Ctsh	VNHAVLAVGYGEQN	OS=Mus musculus GN=Ctsh	1.47434e-07	1.77528e-06	0.401062	12.0412	3.5899
	Herc4	ENIVGDAMEVLR	OS=Mus musculus GN=Herc4	1.47434e-07	1.75797e-06	0.400823	11.9238	3.57577
	Tpi1	SNVNDGVAQSTR	OS=Mus musculus GN=Tpi1	1.47434e-07	1.75209e-06	0.400741	11.8839	3.57093
	Pick1	AFYELSQTHR	OS=Mus musculus GN=Pick1	1.47434e-07	1.75197e-06	0.184341	11.8831	3.57084
	Adss	SIYPTLEIDIEGELQQLK	OS=Mus musculus GN=Adss	4.06899e-06	4.83124e-05	0.222034	11.8733	3.56965
	Plaa	VEAYQWSVSDGR	OS=Mus musculus GN=Plaa	1.47434e-07	1.74991e-06	0.406702	11.8691	3.56914
	Ankrd17	TEVVSLLLDR	OS=Mus musculus GN=Ankrd17	1.47434e-07	1.74788e-06	0.400682	11.8553	3.56746
	Hn1	MASNIFGTPEENPPSWAK	OS=Mus musculus GN=Hn1	1.47434e-07	1.73954e-06	0.186755	11.7988	3.56056
	Sh3gl1	ALYDFEPENDGELGFR	OS=Mus musculus GN=Sh3gl1	1.47434e-07	1.73356e-06	0.400478	11.7582	3.5556
	Phc2	EVVPAEKSVPVAR	OS=Mus musculus GN=Phc2	1.47434e-07	1.73058e-06	0.405302	11.738	3.55311
	Tm9sf2	YNQMDSTEDAQEEFGWK	OS=Mus musculus GN=Tm9sf2	1.47434e-07	1.73026e-06	0.196555	11.7358	3.55284
	Tollip	IAWTHITIPESLK	OS=Mus musculus GN=Tollip	1.47434e-07	1.71504e-06	0.400209	11.6325	3.54009
	Chordc1	KAEPMQWASLELPTTK	OS=Mus musculus GN=Chordc1	1.47434e-07	1.70871e-06	0.400115	11.5896	3.53476
	Tpp2	DGEIIGLSGR	OS=Mus musculus GN=Tpp2	1.47434e-07	1.70193e-06	0.178724	11.5436	3.52902
	Sptbn1	FESLEPEMNNQASR	OS=Mus musculus GN=Sptbn1	1.47434e-07	1.6963e-06	0.406139	11.5055	3.52425
	Mpp6	IDSILEVVQTGR	OS=Mus musculus GN=Mpp6	1.47434e-07	1.69018e-06	0.399837	11.464	3.51903
	Ilf3	EDITQSAQHALR	OS=Mus musculus GN=Ilf3	1.47434e-07	1.68375e-06	0.399739	11.4203	3.51353
	Nckap1	NLITDICTEQCTLSDQLLPK	OS=Mus musculus GN=Nckap1	1.47434e-07	1.67842e-06	0.399657	11.3842	3.50896
	Eif3m	NSLLSLSDT	OS=Mus musculus GN=Eif3m	1.47434e-07	1.6775e-06	0.404687	11.3779	3.50816
	Nsfl1c	TGFSLDNGDLR	OS=Mus musculus GN=Nsfl1c	1.47434e-07	1.67418e-06	0.404647	11.3554	3.50531
	Hcfc1	SIMVAGELGAAR	OS=Mus musculus GN=Hcfc1	1.47434e-07	1.67126e-06	0.404612	11.3356	3.50279
	Nup62	HFLQQATQVNAWDR	OS=Mus musculus GN=Nup62	1.47434e-07	1.66966e-06	0.404592	11.3248	3.50141
	Gnl3	LLGDFQQSCGK	OS=Mus musculus GN=Gnl3	1.47434e-07	1.6664e-06	0.178836	11.3026	3.49859
	Eif3l	VYELQASR	OS=Mus musculus GN=Eif3l	1.47434e-07	1.66378e-06	0.399428	11.2849	3.49632
	Pdcd6ip	ATLVKPTPVNVPVSQK	OS=Mus musculus GN=Pdcd6ip	1.47434e-07	1.66024e-06	0.405737	11.2609	3.49324
	Znf207	LYTGPGLAIHCM	OS=Mus musculus GN=Znf207	1.47434e-07	1.65126e-06	0.405634	11.1999	3.48542
	Ppp2r1a	VLELDNVK	OS=Mus musculus GN=Ppp2r1a	1.47434e-07	1.64471e-06	0.404285	11.1556	3.47969
	Ntpcr	MELFSQPFIQAVR	OS=Mus musculus GN=Ntpcr	1.47434e-07	1.64339e-06	0.404268	11.1466	3.47853
	Pelp1	LASFFLSR	OS=Mus musculus GN=Pelp1	1.47434e-07	1.63786e-06	0.18295	11.1091	3.47367
	Hspd1	TALLDAAGVASLLTTAEAVVTEIPK	OS=Mus musculus GN=Hspd1	1.47434e-07	1.63393e-06	0.398948	11.0824	3.4702
	Rpl36a	HFELGGDKK	OS=Mus musculus GN=Rpl36a	5.55603e-07	6.1416e-06	0.231746	11.0539	3.46649
	Papola	TSSTDLSDIPALPANPIPVIK	OS=Mus musculus GN=Papola	1.47434e-07	1.62507e-06	0.404035	11.0223	3.46236
	Dctn2	VHQLYETIQR	OS=Mus musculus GN=Dctn2	8.51552e-07	9.38236e-06	0.00564566	11.018	3.46178
	Sh3bp1	APTMPPPLPPVPPQPAR	OS=Mus musculus GN=Sh3bp1	1.47434e-07	1.62174e-06	0.205678	10.9998	3.4594
	Dek	LLADANLEEVTMK	OS=Mus musculus GN=Dek	1.47434e-07	1.61312e-06	0.405182	10.9413	3.45171
	Unc45a	LTITSNPEMTFPGER	OS=Mus musculus GN=Unc45a	1.47434e-07	1.60569e-06	0.403782	10.8909	3.44505
	Adsl	QELPFMATENIIMAM	OS=Mus musculus GN=Adsl	1.47434e-07	1.59767e-06	0.190598	10.8365	3.43782
	Nop58	LNLSCIHSPVVNELMR	OS=Mus musculus GN=Nop58	1.47434e-07	1.59432e-06	0.398279	10.8138	3.4348
	Nrd1	ANLVLLSGANEGR	OS=Mus musculus GN=Nrd1	1.47434e-07	1.58369e-06	0.404816	10.7416	3.42514
	Pa2g4	ALLQSSASR	OS=Mus musculus GN=Pa2g4	1.47434e-07	1.58256e-06	0.398073	10.734	3.42412
	Abi1	DIQASQLR	OS=Mus musculus GN=Abi1	1.47434e-07	1.5822e-06	0.403466	10.7316	3.42379
	Itga3	MDVDENLYPDLLVGSL	OS=Mus musculus GN=Itga3	7.95329e-07	8.49986e-06	0.369437	10.6872	3.41782
	Sf3b3	LGAVFNQVAFPLQYTPR	OS=Mus musculus GN=Sf3b3	1.47434e-07	1.56835e-06	0.404619	10.6376	3.4111
	Pak2	IGQGASGTVFTATDVALGQEVAIK	OS=Mus musculus GN=Pak2	1.47434e-07	1.55893e-06	0.397649	10.5737	3.40241
	Arhgef40	AAVQLLQEQEAR	OS=Mus musculus GN=Arhgef40	1.47434e-07	1.54982e-06	0.403013	10.5119	3.39396
	Gcat	FICGTQSIHK	OS=Mus musculus GN=Gcat	1.47434e-07	1.5485e-06	0.397457	10.503	3.39273
	Arhgef40	YGQLLEELLR	OS=Mus musculus GN=Arhgef40	1.47434e-07	1.54652e-06	0.404331	10.4895	3.39088
	Hsd17b4	LGILGLCNTLAIEGR	OS=Mus musculus GN=Hsd17b4	1.47434e-07	1.53729e-06	0.397248	10.427	3.38225
	Naca	DIELVMSQANVSR	OS=Mus musculus GN=Naca	1.47434e-07	1.52662e-06	0.404061	10.3546	3.3722
	Huwe1	SILTLSHEPK	OS=Mus musculus GN=Huwe1	1.47434e-07	1.50989e-06	0.39672	10.2411	3.3563
	Csde1	VGDDVEFEVSSDRR	OS=Mus musculus GN=Csde1	1.47434e-07	1.50756e-06	0.396674	10.2253	3.35407
	Cpsf2	VLELAQLLDQIWR	OS=Mus musculus GN=Cpsf2	1.47434e-07	1.50621e-06	0.23417	10.2161	3.35278
	Cnn3	GPSYGLSAEVK	OS=Mus musculus GN=Cnn3	1.47434e-07	1.50235e-06	0.396571	10.1899	3.34907
	Lcp1	AECMLQQAER	OS=Mus musculus GN=Lcp1	1.47434e-07	1.49757e-06	0.396476	10.1576	3.34448
	Cltc	DAMQYASESK	OS=Mus musculus GN=Cltc	4.3437e-07	4.41194e-06	0.0242453	10.1571	3.34442
	Tcp1	YFVEAGAMAVR	OS=Mus musculus GN=Tcp1	1.47434e-07	1.49638e-06	0.403635	10.1494	3.34333
	Rbbp7	YMPQNPHIIATK	OS=Mus musculus GN=Rbbp7	1.47434e-07	1.49638e-06	0.403635	10.1494	3.34333
	Mrto4	QLGLPTALK	OS=Mus musculus GN=Mrto4	1.47434e-07	1.49615e-06	0.16465	10.1479	3.34311
	Sptbn1	SLLDACEGR	OS=Mus musculus GN=Sptbn1	1.47434e-07	1.48275e-06	0.403436	10.057	3.33013
	Cpsf2	DEQLLTNVLETLR	OS=Mus musculus GN=Cpsf2	7.93571e-07	7.97417e-06	0.019918	10.0485	3.3289
	Adsl	HLMALTMDPLQTASVQWFER	OS=Mus musculus GN=Adsl	1.47434e-07	1.47927e-06	0.396104	10.0334	3.32674
	Hnrnpa2b1	EESGKPGAHVTVK	OS=Mus musculus GN=Hnrnpa2b1	1.47434e-07	1.47627e-06	0.396042	10.0131	3.32381
	Srp68	QAATMSEVEWR	OS=Mus musculus GN=Srp68	1.47434e-07	1.47405e-06	0.395996	9.99803	3.32164
	P4hb	QFLLAAEAIDDIPFGITSNSGVFSK	OS=Mus musculus GN=P4hb	1.47434e-07	1.4634e-06	0.395773	9.92578	3.31118
	Sec23a	ISGAIGPCVSLNSK	OS=Mus musculus GN=Sec23a	1.47434e-07	1.4607e-06	0.403106	9.90745	3.30851
	Msh2	ETLQLEGAAEAGFVR	OS=Mus musculus GN=Msh2	1.47434e-07	1.45797e-06	0.395658	9.88891	3.30581
	Vim	LLQDSVDFSLADAINTEFK	OS=Mus musculus GN=Vim	2.4628e-06	2.43297e-05	0.243909	9.87889	3.30435
	Prkcsh	SLEDQVETLR	OS=Mus musculus GN=Prkcsh	1.47434e-07	1.45533e-06	0.401558	9.871	3.3032
	Kif5b	ELQTLHNLR	OS=Mus musculus GN=Kif5b	1.47434e-07	1.45453e-06	0.395585	9.86558	3.3024
	Sh3bp1	LPQENFNNLR	OS=Mus musculus GN=Sh3bp1	1.47434e-07	1.45042e-06	0.395497	9.83774	3.29833
	Etfb	HSMNPFCEIAVEEAVR	OS=Mus musculus GN=Etfb	1.47434e-07	1.44716e-06	0.175947	9.81564	3.29508
	Ptpn23	FAMDVIGGK	OS=Mus musculus GN=Ptpn23	1.47434e-07	1.44593e-06	0.401401	9.80727	3.29385
	2700029M09Rik	LSLPEDFYHFWK	OS=Mus musculus GN=2700029M09Rik	1.47434e-07	1.44321e-06	0.39534	9.78882	3.29113
	Prpf6	AVECCPTSVELWLALAR	OS=Mus musculus GN=Prpf6	1.47434e-07	1.43758e-06	0.171926	9.75065	3.2855
	Gyg	GALVLGSSLK	OS=Mus musculus GN=Gyg	1.47434e-07	1.43644e-06	0.395192	9.74292	3.28435
	Skiv2l	DPPLAAVTTAVQELLR	OS=Mus musculus GN=Skiv2l	1.47434e-07	1.43189e-06	0.395091	9.71206	3.27978
	Pabpn1	GFAYIEFSDK	OS=Mus musculus GN=Pabpn1	1.47434e-07	1.42471e-06	0.166279	9.66334	3.27252
	Mcm4	EELAEALRK	OS=Mus musculus GN=Mcm4	1.47434e-07	1.42001e-06	0.181641	9.63149	3.26776
	Sptbn1	LVSQDNFGFDLPAVEAATK	OS=Mus musculus GN=Sptbn1	1.47434e-07	1.4198e-06	0.39482	9.63004	3.26754
	Prep	QNCFDDFQCAAEYLIK	OS=Mus musculus GN=Prep	1.47434e-07	1.41747e-06	0.394768	9.61423	3.26517
	Mdh1	KLSSAMSAAK	OS=Mus musculus GN=Mdh1	1.47434e-07	1.41688e-06	0.210538	9.61027	3.26458
	Dusp3	LGITHVLNAAEGR	OS=Mus musculus GN=Dusp3	1.47434e-07	1.41336e-06	0.394674	9.58639	3.26099
	Hist1h1b	ALAAGGYDVEK	OS=Mus musculus GN=Hist1h1b	1.47434e-07	1.41335e-06	0.40084	9.58627	3.26097
	Mthfd1l	GDAPECFVSPLAK	OS=Mus musculus GN=Mthfd1l	1.47434e-07	1.41248e-06	0.394654	9.58037	3.26008
	Dync1h1	ILDDDTIITTLENLKR	OS=Mus musculus GN=Dync1h1	1.47434e-07	1.40926e-06	0.39458	9.55854	3.25679
	Fubp3	IINELILTAQER	OS=Mus musculus GN=Fubp3	1.47434e-07	1.40729e-06	0.400733	9.54522	3.25478
	Cdc42bpb	LEQLLLDGPWR	OS=Mus musculus GN=Cdc42bpb	1.47434e-07	1.40686e-06	0.400725	9.54225	3.25433
	Usp9x	MDTIGHDDEVIR	OS=Mus musculus GN=Usp9x	1.47434e-07	1.39999e-06	0.400601	9.49571	3.24728
	Cct6a	PFSLDALAK	OS=Mus musculus GN=Cct6a	1.47434e-07	1.39896e-06	0.402117	9.48871	3.24621
	Cnn2	CASQVGMTAPGTR	OS=Mus musculus GN=Cnn2	1.47434e-07	1.39465e-06	0.208112	9.45946	3.24176
	Actn4	TIQEMQQK	OS=Mus musculus GN=Actn4	4.45929e-07	4.21817e-06	0.443581	9.45928	3.24173
	Aldoa	YTPSGQSGAAASESLFISNHAY	OS=Mus musculus GN=Aldoa	1.47434e-07	1.3925e-06	0.394189	9.44491	3.23954
	Srp68	DLPDVQELITQVR	OS=Mus musculus GN=Srp68	1.47434e-07	1.39009e-06	0.401967	9.42854	3.23703
	Ktn1	EITDLCNELESLK	OS=Mus musculus GN=Ktn1	1.47434e-07	1.38973e-06	0.394123	9.4261	3.23666
	Lasp1	TQDQISNIK	OS=Mus musculus GN=Lasp1	1.47434e-07	1.3833e-06	0.393969	9.38245	3.22996
	Uchl5	EFSQSFDAAMK	OS=Mus musculus GN=Uchl5	1.47434e-07	1.38285e-06	0.393959	9.37944	3.2295
	Serpinb6a	LGMTDAFGGR	OS=Mus musculus GN=Serpinb6a	1.47434e-07	1.37032e-06	0.400052	9.29443	3.21637
	Pfas	PSCFQQQQGLR	OS=Mus musculus GN=Pfas	1.47434e-07	1.3646e-06	0.399943	9.25563	3.21033
	Ctnnd1	TPAILEASAGAIQNLCAGR	OS=Mus musculus GN=Ctnnd1	1.47434e-07	1.36389e-06	0.40151	9.25085	3.20959
	Hnrnpa2b1	NQQPSNYGPMK	OS=Mus musculus GN=Hnrnpa2b1	1.47434e-07	1.36266e-06	0.393464	9.24248	3.20828
	Wdr18	VFDLEDEVR	OS=Mus musculus GN=Wdr18	1.47434e-07	1.36266e-06	0.393464	9.24248	3.20828
	Mov10	AHILACAPSNSGADLLCQR	OS=Mus musculus GN=Mov10	1.47434e-07	1.36222e-06	0.393453	9.23947	3.20781
	Ptk2	LGDFGLSR	OS=Mus musculus GN=Ptk2	1.47434e-07	1.35767e-06	0.39334	9.20862	3.20298
	Trnt1	LQSPEFQSLFTEGLK	OS=Mus musculus GN=Trnt1	1.47434e-07	1.32017e-06	0.392367	8.95426	3.16257
	Acaca	NLLVTMLIDQLCGR	OS=Mus musculus GN=Acaca	1.47434e-07	1.3144e-06	0.392212	8.91513	3.15626
	Aldoa	QLLLTADDR	OS=Mus musculus GN=Aldoa	1.47434e-07	1.31351e-06	0.392188	8.90911	3.15528
	Hnrnpa1	GFGFVTYATVEEVDAAMNARPHK	OS=Mus musculus GN=Hnrnpa1	1.47434e-07	1.31282e-06	0.400559	8.90446	3.15453
	Sec31a	EQTLSPTIINGLHSIAR	OS=Mus musculus GN=Sec31a	1.47434e-07	1.31036e-06	0.179551	8.88776	3.15182
	Tpm4	LVILEGELK	OS=Mus musculus GN=Tpm4	1.47434e-07	1.30226e-06	0.398682	8.83282	3.14287
	Uggt1	EYLDLTASNNFYVDDFAR	OS=Mus musculus GN=Uggt1	1.47434e-07	1.29884e-06	0.17989	8.80964	3.13908
	Ddx54	ALPSFPTSECVSDVEPDTR	OS=Mus musculus GN=Ddx54	1.47434e-07	1.29411e-06	0.400189	8.77756	3.13382
	U2surp	WEAVDESELEAQAVTTSK	OS=Mus musculus GN=U2surp	1.47434e-07	1.29159e-06	0.398452	8.76044	3.131
	Eif2s1	EVLINNINR	OS=Mus musculus GN=Eif2s1	1.47434e-07	1.28553e-06	0.398319	8.7193	3.12421
	Idh2	LNEHFLNTTDFLDTIK	OS=Mus musculus GN=Idh2	1.47434e-07	1.28499e-06	0.391395	8.7157	3.12362
	Rplp0	NVASVCLQIGYPTVASVPH	OS=Mus musculus GN=Rplp0	1.47434e-07	1.28366e-06	0.391357	8.70667	3.12212
	Lmnb1	NQNSWGTGEDVK	OS=Mus musculus GN=Lmnb1	1.47434e-07	1.27745e-06	0.391178	8.66453	3.11512
	Tln1	ERIPEALAGPPNDFGLFLSDDDPKK	OS=Mus musculus GN=Tln1	1.47434e-07	1.27723e-06	0.391171	8.66303	3.11487
	Prpf4	LWSLDSDEPVADIEGHTVR	OS=Mus musculus GN=Prpf4	1.47434e-07	1.27543e-06	0.197512	8.65085	3.11284
	Scamp3	AQQEFAAGVFSNPAVR	OS=Mus musculus GN=Scamp3	1.47434e-07	1.2688e-06	0.397946	8.60588	3.10532
	Mcm6	KMEEEEDESALKR	OS=Mus musculus GN=Mcm6	1.47434e-07	1.26319e-06	0.39076	8.56783	3.09893
	Pgm2	MEFGTAGLR	OS=Mus musculus GN=Pgm2	1.47434e-07	1.2559e-06	0.390542	8.51839	3.09058
	Ado	GSSTGSEGPAPGFPENLSLLK	OS=Mus musculus GN=Ado	1.47434e-07	1.25108e-06	0.390396	8.48565	3.08503
	Usp14	AQLFALTGVQPAR	OS=Mus musculus GN=Usp14	1.47434e-07	1.24782e-06	0.39746	8.46356	3.08127
	Ppp2r2a	ILHTAWHPK	OS=Mus musculus GN=Ppp2r2a	1.47434e-07	1.24299e-06	0.390148	8.43079	3.07567
	Slc3a2	SLLHGDFHALSSSPDLFSYIR	OS=Mus musculus GN=Slc3a2	1.47434e-07	1.23963e-06	0.390044	8.40799	3.07176
	Mcm2	QLVAEQVTYQR	OS=Mus musculus GN=Mcm2	1.47434e-07	1.23822e-06	0.397232	8.39848	3.07013
	Kpna1	DYVLNCNILPPLLQLFSK	OS=Mus musculus GN=Kpna1	1.47434e-07	1.2373e-06	0.389972	8.39219	3.06905
	Heatr3	EGCLEIVLQYLR	OS=Mus musculus GN=Heatr3	1.47434e-07	1.23596e-06	0.397177	8.38309	3.06748
	Mcm6	ISNLIVLHLR	OS=Mus musculus GN=Mcm6	1.47434e-07	1.23225e-06	0.398871	8.35798	3.06315
	Uba1	NEEDATELVGLAQAVNAR	OS=Mus musculus GN=Uba1	1.47434e-07	1.22699e-06	0.389647	8.32228	3.05698
	Rpl17	INPYMSSPCHIEMILTEK	OS=Mus musculus GN=Rpl17	1.47434e-07	1.22495e-06	0.389582	8.30843	3.05458
	Ubxn7	QEILVEPEPLFGAPK	OS=Mus musculus GN=Ubxn7	1.47434e-07	1.2246e-06	0.389571	8.3061	3.05417
	Clic4	EEDKEPLIELFVK	OS=Mus musculus GN=Clic4	1.47434e-07	1.22331e-06	0.396869	8.2973	3.05264
	Fscn1	YLKGDHAGVLK	OS=Mus musculus GN=Fscn1	1.47434e-07	1.22252e-06	0.389504	8.29195	3.05171
	Srsf1	IYVGNLPPDIR	OS=Mus musculus GN=Srsf1	1.47434e-07	1.22195e-06	0.389486	8.28811	3.05104
	Ube2l3	TDQVIQSLIALVNDPQPEHPLR	OS=Mus musculus GN=Ube2l3	1.47434e-07	1.19888e-06	0.398094	8.13164	3.02355
	Smchd1	LHFKPFGNPVFAR	OS=Mus musculus GN=Smchd1	1.47434e-07	1.18947e-06	0.397865	8.06782	3.01218
	Plbd2	SLLLDAASGQLR	OS=Mus musculus GN=Plbd2	1.47434e-07	1.18846e-06	0.395978	8.06091	3.01094
	Hddc2	MAVMAMVTR	OS=Mus musculus GN=Hddc2	1.47434e-07	1.18297e-06	0.388184	8.02367	3.00426
	Lap3	SAIVSAAK	OS=Mus musculus GN=Lap3	2.23317e-06	1.79176e-05	0.168408	8.0234	3.00421
	Rnh1	TNELGDGGVGLVLQGLQNPTCK	OS=Mus musculus GN=Rnh1	1.47434e-07	1.177e-06	0.395672	7.98322	2.99697
	Glud1	TFVVQGFGNVGLHSMR	OS=Mus musculus GN=Glud1	1.47434e-07	1.17559e-06	0.39752	7.97363	2.99524
	Hdlbp	TGAHLELSLAK	OS=Mus musculus GN=Hdlbp	1.47434e-07	1.17372e-06	0.397473	7.96098	2.99295
	Srek1	FAFVEFADQNSVPR	OS=Mus musculus GN=Srek1	1.47434e-07	1.17273e-06	0.397448	7.95423	2.99172
	Tsr1	IFQFQNFVNTR	OS=Mus musculus GN=Tsr1	1.47434e-07	1.17034e-06	0.397388	7.93802	2.98878
	Calu	EEFTAFLHPEEYDYMK	OS=Mus musculus GN=Calu	1.47434e-07	1.16864e-06	0.38768	7.92652	2.98669
	mCG_6739	DHASIQMNVAEVDR	OS=Mus musculus GN=mCG_6739	1.47434e-07	1.16171e-06	0.38743	7.87949	2.9781
	Eif3i	QINDIQLSR	OS=Mus musculus GN=Eif3i	1.47434e-07	1.15899e-06	0.395176	7.86107	2.97473
	Lgals3	EISQLGISGDITLTSANHAMI	OS=Mus musculus GN=Lgals3	1.47434e-07	1.1581e-06	0.387299	7.85503	2.97362
	Ube3c	LAYPETKPEVR	OS=Mus musculus GN=Ube3c	1.47434e-07	1.1561e-06	0.387226	7.84148	2.97113
	Rpl5	HIMGQNVADY	OS=Mus musculus GN=Rpl5	1.47434e-07	1.15468e-06	0.387174	7.83185	2.96935
	Xpot	LMMAQDEER	OS=Mus musculus GN=Xpot	1.47434e-07	1.15366e-06	0.396956	7.8249	2.96807
	Rpl6	SSITPGTVLIILT	OS=Mus musculus GN=Rpl6	8.74713e-07	6.82724e-06	0.361287	7.80512	2.96442
	Eftud2	FFDDPMLLELAK	OS=Mus musculus GN=Eftud2	1.47434e-07	1.14004e-06	0.394634	7.73252	2.95094
	Myh9	SMEAEMIQLQEELAAAER	OS=Mus musculus GN=Myh9	1.47434e-07	1.13924e-06	0.386597	7.7271	2.94993
	Fh	ETAIELGYLTAEQFDEWVKPK	OS=Mus musculus GN=Fh	1.47434e-07	1.13347e-06	0.394441	7.68796	2.9426
	Nsun2	IVPEGEWDQFMESLREPLPATLR	OS=Mus musculus GN=Nsun2	1.33148e-06	1.0219e-05	0.0158973	7.67491	2.94015
	Hmgb1	KLGEMWNNTAADDK	OS=Mus musculus GN=Hmgb1	1.47434e-07	1.12797e-06	0.185822	7.65065	2.93558
	Ahnak	LRSEDGVEGDLGETQSR	OS=Mus musculus GN=Ahnak	1.47434e-07	1.12782e-06	0.396257	7.64964	2.93539
	Hnrnph1	YVELFLNSTAGASGGAYEHR	OS=Mus musculus GN=Hnrnph1	1.47434e-07	1.1253e-06	0.38606	7.63258	2.93217
	Matr3	VVHIMDFQR	OS=Mus musculus GN=Matr3	1.47434e-07	1.12454e-06	0.38603	7.62739	2.93119
	Rps5	GSSNSYAIK	OS=Mus musculus GN=Rps5	1.47434e-07	1.12295e-06	0.394126	7.61658	2.92914
	Snrnp40	VWDVRPFAPK	OS=Mus musculus GN=Snrnp40	1.47434e-07	1.12113e-06	0.39607	7.60428	2.92681
	Wdr1	GPVTDVAYSHDGAFLAVCDASK	OS=Mus musculus GN=Wdr1	1.47434e-07	1.12015e-06	0.396042	7.59763	2.92555
	Ruvbl1	QAASGLVGQENAR	OS=Mus musculus GN=Ruvbl1	1.47434e-07	1.09761e-06	0.393339	7.44473	2.89622
	Pdia4	TFDAIVMDPK	OS=Mus musculus GN=Pdia4	1.47434e-07	1.09734e-06	0.393331	7.44293	2.89587
	Necap1	SAFIGIGFTDR	OS=Mus musculus GN=Necap1	1.47434e-07	1.09612e-06	0.393292	7.43465	2.89427
	Clint1	DKYVGVSSDSVGGFR	OS=Mus musculus GN=Clint1	1.47434e-07	1.09295e-06	0.395251	7.4131	2.89008
	Smek1	SAATDIFSYLVEYNPSMVR	OS=Mus musculus GN=Smek1	1.47434e-07	1.09237e-06	0.395234	7.40916	2.88931
	Tln1	IPEALAGPPNDFGLFLSDDDPKK	OS=Mus musculus GN=Tln1	1.47434e-07	1.07369e-06	0.392555	7.28252	2.86444
	Acsl3	LLLCGGAPLSATTQR	OS=Mus musculus GN=Acsl3	1.47434e-07	1.07265e-06	0.39252	7.27541	2.86303
	Trmt2a	ASGVTSLYFVEEGQR	OS=Mus musculus GN=Trmt2a	1.47434e-07	1.07001e-06	0.383763	7.25752	2.85948
	Fkbp4	AWDIAVATMK	OS=Mus musculus GN=Fkbp4	1.47434e-07	1.06509e-06	0.392263	7.22419	2.85284
	Ptpre	AEGLLDVFQAVK	OS=Mus musculus GN=Ptpre	1.47434e-07	1.06266e-06	0.383436	7.2077	2.84954
	Wars	TDIQCLIPCAIDQDPYFR	OS=Mus musculus GN=Wars	1.47434e-07	1.0621e-06	0.394296	7.20391	2.84878
	Fabp5	MAAMAKPDCIITCDGNNITVK	OS=Mus musculus GN=Fabp5	1.47434e-07	1.0586e-06	0.394183	7.18011	2.84401
	Ecm29	FQEFSDIVIPLIK	OS=Mus musculus GN=Ecm29	1.47434e-07	1.05571e-06	0.383121	7.16051	2.84006
	Ppid	LCVIAECGELK	OS=Mus musculus GN=Ppid	1.47434e-07	1.05287e-06	0.382991	7.14125	2.83618
	Aars	KDPDMVKDIINEEEVQFLK	OS=Mus musculus GN=Aars	2.62424e-06	1.86459e-05	0.0233713	7.10524	2.82888
	Khsrp	VQISPDSGGLPER	OS=Mus musculus GN=Khsrp	1.47434e-07	1.04463e-06	0.391545	7.08538	2.82485
	Fam98a	RLDVTVQSFGWSDR	OS=Mus musculus GN=Fam98a	1.47434e-07	1.04437e-06	0.382597	7.08361	2.82448
	Myh9	VVQEQGTHPK	OS=Mus musculus GN=Myh9	1.47434e-07	1.04237e-06	0.382503	7.07006	2.82172
	Rpl10a	VLGDQQHCDEAK	OS=Mus musculus GN=Rpl10a	2.7467e-06	1.94102e-05	0.441234	7.06673	2.82104
	Smu1	LMALLGQALK	OS=Mus musculus GN=Smu1	1.47434e-07	1.03229e-06	0.159878	7.00171	2.80771
	Myl12a	NAFACFDEEAIGTIQEDYLR	OS=Mus musculus GN=Myl12a	1.47434e-07	1.03137e-06	0.381979	6.99548	2.80642
	Actn4	RDHALLEEQSK	OS=Mus musculus GN=Actn4	9.87122e-07	6.86554e-06	0.469313	6.95511	2.79807
	Hint1	MVVNEGADGGQSVYHIHLHVLGGR	OS=Mus musculus GN=Hint1	1.32744e-06	9.21577e-06	0.189232	6.94252	2.79546
	Nras	SYGIPFIETSAK	OS=Mus musculus GN=Nras	1.47434e-07	1.02255e-06	0.381548	6.93566	2.79403
	Lrrc40	GTAAVLEYLR	OS=Mus musculus GN=Lrrc40	1.47434e-07	1.02076e-06	0.381459	6.92347	2.79149
	Osgep	DGTVLANPR	OS=Mus musculus GN=Osgep	1.47434e-07	1.01985e-06	0.381414	6.91729	2.79021
	Fam114a2	TAALVLHGQK	OS=Mus musculus GN=Fam114a2	1.47434e-07	1.01764e-06	0.381304	6.90232	2.78708
	Tnks1bp1	ELGVGQVDWGDDLGLR	OS=Mus musculus GN=Tnks1bp1	1.47434e-07	1.01586e-06	0.390475	6.89022	2.78455
	Tbca	MKAEDGENYAIK	OS=Mus musculus GN=Tbca	1.47434e-07	1.01448e-06	0.392682	6.88086	2.78259
	Abi1	VADYCENNYIQATDK	OS=Mus musculus GN=Abi1	1.47434e-07	1.01446e-06	0.392682	6.88077	2.78257
	Map1b	SSMLFDTMQHHLALNR	OS=Mus musculus GN=Map1b	1.47434e-07	1.01302e-06	0.39263	6.87102	2.78052
	Stip1	KDCEECIQLEPTFIK	OS=Mus musculus GN=Stip1	1.47434e-07	1.01298e-06	0.390364	6.87069	2.78045
	H2-D	TWTAADMAAQITR	OS=Mus musculus GN=H2-D	1.47434e-07	1.0038e-06	0.390005	6.80848	2.76733
	Rnf40	TEVIQLEDTLAQVR	OS=Mus musculus GN=Rnf40	1.47434e-07	1.00335e-06	0.392279	6.80542	2.76668
	Srp14	VLLESEQFLTELTR	OS=Mus musculus GN=Srp14	1.47434e-07	9.99421e-07	0.380375	6.77875	2.76102
	Ubr4	APSYIEIFGR	OS=Mus musculus GN=Ubr4	1.47434e-07	9.99387e-07	0.392132	6.77852	2.76097
	Tpr	NIEELQQQNQR	OS=Mus musculus GN=Tpr	1.47434e-07	9.98201e-07	0.380311	6.77048	2.75926
	Tagln2	IQASSMAFK	OS=Mus musculus GN=Tagln2	1.36009e-06	9.1793e-06	0.233277	6.74906	2.75469
	Myef2	VGEVTYVELFK	OS=Mus musculus GN=Myef2	1.47434e-07	9.93097e-07	0.380042	6.73586	2.75186
	Ube2k	AGAPVSSPEYTK	OS=Mus musculus GN=Ube2k	3.63166e-06	2.42492e-05	0.040373	6.67716	2.73923
	Hmgb1	LFCSEYRPK	OS=Mus musculus GN=Hmgb1	1.47434e-07	9.74136e-07	0.379013	6.60725	2.72405
	Atp2a2	NMLFSGTNIAAGK	OS=Mus musculus GN=Atp2a2	1.47434e-07	9.73892e-07	0.379	6.60559	2.72369
	Mat2b	ESLWPFLIDK	OS=Mus musculus GN=Mat2b	1.47434e-07	9.73424e-07	0.391137	6.60242	2.72299
	Tubb2a	INVYYNEAAGNK	OS=Mus musculus GN=Tubb2a	1.47434e-07	9.73382e-07	0.378971	6.60213	2.72293
	Snx1	VTTQTSLPMFR	OS=Mus musculus GN=Snx1	1.47434e-07	9.73271e-07	0.378965	6.60138	2.72277
	Eprs	GFFICDQPYEPVSPYSCR	OS=Mus musculus GN=Eprs	1.47434e-07	9.70978e-07	0.391039	6.58583	2.71937
	Vcp	GGNIGDGGGAADR	OS=Mus musculus GN=Vcp	1.47434e-07	9.66776e-07	0.38847	6.55733	2.71311
	Copg1	ATFYLNVLEQK	OS=Mus musculus GN=Copg1	1.47434e-07	9.66325e-07	0.378575	6.55427	2.71244
	Flna	THIQDNHDGTYTVAYVPDVPGR	OS=Mus musculus GN=Flna	1.47434e-07	9.62398e-07	0.390694	6.52763	2.70656
	Gtpbp4	KLEELEKEEELR	OS=Mus musculus GN=Gtpbp4	1.47434e-07	9.60234e-07	0.378227	6.51296	2.70331
	Dhx9	TTQVPQYILDDFIQNDR	OS=Mus musculus GN=Dhx9	1.47434e-07	9.59264e-07	0.388141	6.50638	2.70186
	Rtcb	GFVPNMQVEGVFYVNDALEK	OS=Mus musculus GN=Rtcb	1.47434e-07	9.54254e-07	0.37788	6.4724	2.6943
	Rsl1d1	SVSLPIFSSFVTSQDENAVSLR	OS=Mus musculus GN=Rsl1d1	1.47434e-07	9.53159e-07	0.387869	6.46497	2.69264
	Bola1	LEQALSPEVLELR	OS=Mus musculus GN=Bola1	1.47434e-07	9.52002e-07	0.377747	6.45712	2.69089
	Prpsap2	LIEESAIDEVVVTNTIPHEIQK	OS=Mus musculus GN=Prpsap2	1.47434e-07	9.49749e-07	0.377615	6.44184	2.68747
	Psme2	DEAAYGALR	OS=Mus musculus GN=Psme2	1.47434e-07	9.48859e-07	0.387674	6.43581	2.68612
	Rplp1	IYSALILHDDEVTVTEDK	OS=Mus musculus GN=Rplp1	1.47434e-07	9.45533e-07	0.377364	6.41325	2.68105
	Canx	DEEEEEEKLEEK	OS=Mus musculus GN=Canx	1.15478e-06	7.38663e-06	0.47707	6.39655	2.67729
	Npepps	ILMDKPEMSVVLK	OS=Mus musculus GN=Npepps	1.47434e-07	9.36079e-07	0.387084	6.34912	2.66656
	Ppp2r1a	HMLPTVLR	OS=Mus musculus GN=Ppp2r1a	7.13095e-06	4.49894e-05	0.00610856	6.30903	2.65742
	Cfl1	FWAPENAPLK	OS=Mus musculus GN=Cfl1	1.47434e-07	9.29401e-07	0.376377	6.30383	2.65623
	Fnbp4	NANFEALPEDWR	OS=Mus musculus GN=Fnbp4	1.47434e-07	9.2777e-07	0.376275	6.29277	2.65369
	Dhx9	GMTLVTPLQLL	OS=Mus musculus GN=Dhx9	7.76912e-07	4.85985e-06	0.362149	6.25535	2.64509
	Naa10	NARPEDLMNMQHCNLLCLPENYQMK	OS=Mus musculus GN=Naa10	1.47434e-07	9.18969e-07	0.388822	6.23307	2.63994
	Nans	IPAGTTLTLDMLTVK	OS=Mus musculus GN=Nans	1.47434e-07	9.16731e-07	0.375572	6.21789	2.63642
	Sar1a	EIFGLYGQTTGK	OS=Mus musculus GN=Sar1a	1.47434e-07	9.11472e-07	0.375229	6.18222	2.62812
	Anxa1	AAYLQENGKPLDEVLR	OS=Mus musculus GN=Anxa1	9.83918e-06	6.07901e-05	4.15501e-05	6.17837	2.62723
	Mcm7	DVLDVYIEHR	OS=Mus musculus GN=Mcm7	3.16982e-06	1.95679e-05	0.0186024	6.17317	2.62601
	Mcm3	DHQTITIQEMPEK	OS=Mus musculus GN=Mcm3	1.47434e-07	9.09946e-07	0.388406	6.17187	2.62571
	Ipo11	AGLITNFNEPINQIATQIAVLIAK	OS=Mus musculus GN=Ipo11	1.47434e-07	9.071e-07	0.37494	6.15257	2.62119
	Eftud2	MYSTDDGVQFHAFGR	OS=Mus musculus GN=Eftud2	1.47434e-07	9.0325e-07	0.374683	6.12646	2.61505
	Smarcc2	DIGEGNLSTAAAAALAAAAVK	OS=Mus musculus GN=Smarcc2	1.47434e-07	9.02687e-07	0.385443	6.12263	2.61415
	EG433182	SFVQNYPVVSIEDPFDQDDWGAWQK	OS=Mus musculus GN=EG433182	3.16999e-06	1.93579e-05	0.288362	6.10663	2.61038
	Dlat	VPLPSLSPTMQAGTIAR	OS=Mus musculus GN=Dlat	1.47434e-07	9.00244e-07	0.374481	6.10606	2.61024
	Kif13b	LSLVDLAGSER	OS=Mus musculus GN=Kif13b	1.47434e-07	8.99722e-07	0.374445	6.10252	2.60941
	Cmtr1	EDVLSFIQSHNPLGP	OS=Mus musculus GN=Cmtr1	1.47434e-07	8.98036e-07	0.38784	6.09109	2.6067
	Vim	VELQELNDRF	OS=Mus musculus GN=Vim	1.47434e-07	8.88727e-07	0.373688	6.02795	2.59167
	Mat2b	LEESAVTVMFDK	OS=Mus musculus GN=Mat2b	1.47434e-07	8.88336e-07	0.387365	6.02529	2.59103
	Luc7l	NSMPASSFQQQK	OS=Mus musculus GN=Luc7l	1.47434e-07	8.85299e-07	0.373447	6.00469	2.58609
	Rnh1	ALEEERPSLR	OS=Mus musculus GN=Rnh1	1.47434e-07	8.84889e-07	0.384505	6.00192	2.58542
	Gcn1l1	VLAGLYMGR	OS=Mus musculus GN=Gcn1l1	1.47434e-07	8.83458e-07	0.387121	5.99221	2.58309
	Rps12	VVGCSCVVVK	OS=Mus musculus GN=Rps12	1.47434e-07	8.8217e-07	0.373225	5.98347	2.58098
	Eif4h	KEALTYDGALLGDR	OS=Mus musculus GN=Eif4h	1.47434e-07	8.81293e-07	0.38431	5.97752	2.57955
	Kif11	EAGNINQSLLTLGR	OS=Mus musculus GN=Kif11	1.47434e-07	8.70516e-07	0.383712	5.90443	2.5618
	Sptbn1	ALVADSHPESER	OS=Mus musculus GN=Sptbn1	1.47434e-07	8.69067e-07	0.372274	5.8946	2.55939
	Heatr3	TSSPNSVAVDICSK	OS=Mus musculus GN=Heatr3	1.47434e-07	8.68479e-07	0.37223	5.89061	2.55842
	Dnajc7	NANAVMEYEK	OS=Mus musculus GN=Dnajc7	1.47434e-07	8.66703e-07	0.372098	5.87857	2.55547
	Eef1a1	TLLEALDCILPPTRPTDK	OS=Mus musculus GN=Eef1a1	1.05615e-06	6.2009e-06	0.181657	5.87125	2.55367
	Cul2	LTSFITVFK	OS=Mus musculus GN=Cul2	1.47434e-07	8.5936e-07	0.385866	5.82876	2.54319
	Cct2	SLHDALCVLAQTVKDPR	OS=Mus musculus GN=Cct2	1.04136e-06	6.05582e-06	0.174762	5.81529	2.53985
	Ppme1	DVGNVVEAMYGDLPPPVMLIGH	OS=Mus musculus GN=Ppme1	1.47434e-07	8.54333e-07	0.371159	5.79466	2.53472
	Nit2	AVDNQVYVATASPAR	OS=Mus musculus GN=Nit2	1.47434e-07	8.50669e-07	0.385391	5.76981	2.52852
	Dnpep	YASNAVSESMIR	OS=Mus musculus GN=Dnpep	1.47434e-07	8.47687e-07	0.37064	5.74959	2.52346
	Ptma	VDTSSEITTK	OS=Mus musculus GN=Ptma	2.0228e-05	0.000116075	0.192935	5.73835	2.52064
	Map4	VATVPIKDK	OS=Mus musculus GN=Map4	1.47434e-07	8.459e-07	0.370498	5.73747	2.52041
	Fam21	RPTSFADELAAR	OS=Mus musculus GN=Fam21	1.47434e-07	8.38924e-07	0.38473	5.69015	2.50847
	Cdkn2aipnl	QAADFAEQFR	OS=Mus musculus GN=Cdkn2aipnl	1.47434e-07	8.32342e-07	0.3694	5.64551	2.4971
	Aspscr1	AALQNTTLQSLGLTGGSATIR	OS=Mus musculus GN=Aspscr1	1.47434e-07	8.31277e-07	0.369312	5.63829	2.49526
	Tial1	DAAAALAAMNGR	OS=Mus musculus GN=Tial1	1.47434e-07	8.28749e-07	0.38121	5.62114	2.49086
	Fnbp4	FQIGELANTLTSK	OS=Mus musculus GN=Fnbp4	1.47434e-07	8.28703e-07	0.369098	5.62083	2.49078
	Sptan1	DLTSWVTEMK	OS=Mus musculus GN=Sptan1	1.47434e-07	8.28312e-07	0.384112	5.61818	2.4901
	Akr1a1	HPDEPVLLEEPVVLAL	OS=Mus musculus GN=Akr1a1	2.78007e-06	1.54879e-05	0.0869898	5.57104	2.47795
	Mcm3	IIKPTLTQESAAYIAEEYSR	OS=Mus musculus GN=Mcm3	1.88549e-06	1.04389e-05	0.0603526	5.53645	2.46896
	Ranbp2	HTGPGLLSM	OS=Mus musculus GN=Ranbp2	1.47434e-07	8.14371e-07	0.383269	5.52361	2.46561
	Ahnak	KANIDVSGPK	OS=Mus musculus GN=Ahnak	2.54227e-06	1.40268e-05	0.0247709	5.51741	2.46399
	Gpi	ETITNAETAK	OS=Mus musculus GN=Gpi	2.20651e-06	1.21436e-05	0.243225	5.50354	2.46036
	Armc6	VIIEGGGALAALQAMK	OS=Mus musculus GN=Armc6	1.47434e-07	8.10374e-07	0.36752	5.49651	2.45852
	AI837181	TTPATELDAWLAK	OS=Mus musculus GN=AI837181	1.47434e-07	8.06225e-07	0.367149	5.46836	2.45111
	Rab1	NATNVEQSFMTMAAEIK	OS=Mus musculus GN=Rab1	1.47434e-07	8.03995e-07	0.366948	5.45324	2.44711
	Tpm3	ALKDEEKMELQEIQLK	OS=Mus musculus GN=Tpm3	1.47434e-07	8.01534e-07	0.38246	5.43655	2.44269
	Hgs	VVQDTYQIMK	OS=Mus musculus GN=Hgs	1.47434e-07	8.01121e-07	0.366687	5.43375	2.44195
	Nek7	VQIFDLMDAK	OS=Mus musculus GN=Nek7	1.47434e-07	8.00852e-07	0.379352	5.43192	2.44146
	Cap1	HAEMVHTGLK	OS=Mus musculus GN=Cap1	2.82577e-06	1.5324e-05	0.0300405	5.42294	2.43908
	Nsf	MGIGGLDKEFSDIFR	OS=Mus musculus GN=Nsf	1.47434e-07	7.96393e-07	0.37904	5.40167	2.43341
	Gsn	DGGQTAPASIR	OS=Mus musculus GN=Gsn	1.77111e-06	9.52878e-06	0.456974	5.3801	2.42763
	Dctn1	FTQSALDCMGVEVGR	OS=Mus musculus GN=Dctn1	1.47434e-07	7.87896e-07	0.365453	5.34404	2.41793
	Rps19	GGAGVGSMTK	OS=Mus musculus GN=Rps19	1.47434e-07	7.86213e-07	0.378309	5.33263	2.41485
	Hcfc1	GAPGQPGTILR	OS=Mus musculus GN=Hcfc1	1.47434e-07	7.85059e-07	0.378225	5.3248	2.41273
	Kif2a	FDYAFDDSAPNEMVYR	OS=Mus musculus GN=Kif2a	1.47434e-07	7.83935e-07	0.365073	5.31718	2.41066
	Hdgf	DLFPYEESKEK	OS=Mus musculus GN=Hdgf	2.31686e-06	1.22803e-05	0.195282	5.30042	2.40611
	Pds5a	MEDDKVAEAAIQIFR	OS=Mus musculus GN=Pds5a	1.47434e-07	7.80773e-07	0.364766	5.29573	2.40483
	Ola1	YEDFKDEGSENAVK	OS=Mus musculus GN=Ola1	1.09814e-06	5.79037e-06	0.0432243	5.27287	2.39859
	P4hb	LKAEGSEIR	OS=Mus musculus GN=P4hb	1.62586e-06	8.55564e-06	0.458221	5.26224	2.39568
	Fasn	NVTFHGILLDAL	OS=Mus musculus GN=Fasn	1.92436e-06	1.00886e-05	0.326641	5.24255	2.39027
	Mat2b	AVLENNLGAAVLR	OS=Mus musculus GN=Mat2b	1.47434e-07	7.69265e-07	0.377037	5.21768	2.38341
	Sf3a1	LNGQGLVFTLPLTDQVSVIK	OS=Mus musculus GN=Sf3a1	1.47434e-07	7.69179e-07	0.363611	5.21709	2.38325
	Nucb2	VYNPQNAEDDMIEMEEER	OS=Mus musculus GN=Nucb2	1.47434e-07	7.68057e-07	0.376944	5.20949	2.38114
	Asns	APSPEKAEEESER	OS=Mus musculus GN=Asns	8.974e-07	4.6653e-06	0.448939	5.19868	2.37815
	Eif2s2	DIDEAEEAIK	OS=Mus musculus GN=Eif2s2	2.8629e-06	1.48332e-05	0.045109	5.18119	2.37328
	Aldh9a1	ANDTTFGLAAGVFTR	OS=Mus musculus GN=Aldh9a1	1.47434e-07	7.61423e-07	0.362813	5.16449	2.36863
	Hnrnpm	MGLAMGGAGGASFDR	OS=Mus musculus GN=Hnrnpm	1.47434e-07	7.56031e-07	0.362245	5.12792	2.35837
	Rnh1	LQLEYCNLTATSCEPLASVLR	OS=Mus musculus GN=Rnh1	1.47434e-07	7.54944e-07	0.362129	5.12054	2.3563
	Cap1	INSITVDNCKK	OS=Mus musculus GN=Cap1	9.17361e-07	4.69422e-06	0.150479	5.11709	2.35532
	Rpl27a	RNQSFCPTVNLDK	OS=Mus musculus GN=Rpl27a	2.12843e-06	1.0806e-05	0.0289888	5.07698	2.34397
	Anxa7	SELSGNMEELILAL	OS=Mus musculus GN=Anxa7	4.35319e-06	2.20678e-05	0.24109	5.06933	2.3418
	Tpi1	AEGLGVIACIGEK	OS=Mus musculus GN=Tpi1	1.47434e-07	7.4734e-07	0.37528	5.06897	2.34169
	Psmd1	DTSEDVEELVEPVAAHGPK	OS=Mus musculus GN=Psmd1	1.47434e-07	7.45624e-07	0.361117	5.05733	2.33838
	Cct4	TDMDNQIVVSDYAQMDR	OS=Mus musculus GN=Cct4	1.47434e-07	7.44748e-07	0.361021	5.05138	2.33668
	Nsfl1c	EFVAVTGTEEDR	OS=Mus musculus GN=Nsfl1c	1.47434e-07	7.44109e-07	0.37839	5.04705	2.33544
	Mmp20	DAAVELNGYIYFFSGR	OS=Mus musculus GN=Mmp20	1.47434e-07	7.38002e-07	0.360265	5.00563	2.32355
	Flna	IECDDKGDGSCDVR	OS=Mus musculus GN=Flna	2.06247e-06	1.02367e-05	0.293975	4.96333	2.31131
	Eif3k	PENLATLER	OS=Mus musculus GN=Eif3k	1.47434e-07	7.29573e-07	0.377226	4.94846	2.30698
	Hnrnpu	VSELKEELKK	OS=Mus musculus GN=Hnrnpu	2.48367e-06	1.2251e-05	0.469488	4.93263	2.30236
	Galk1	QCEEVAQALGK	OS=Mus musculus GN=Galk1	1.47434e-07	7.19859e-07	0.376414	4.88257	2.28764
	Ppia	NPTVFFDITADDEPLGR	OS=Mus musculus GN=Ppia	1.47434e-07	7.15793e-07	0.3725	4.85499	2.27947
	Upp1	AAVVCVTLLDR	OS=Mus musculus GN=Upp1	1.47434e-07	7.15168e-07	0.357565	4.85076	2.27821
	Picalm	LPNDLLDLQQPTFHPSVHAM	OS=Mus musculus GN=Picalm	1.47434e-07	7.12938e-07	0.357288	4.83563	2.2737
	Map4k5	GANILLTDHGDVK	OS=Mus musculus GN=Map4k5	1.47434e-07	7.11396e-07	0.357096	4.82517	2.27058
	Tra2b	ANPDPNCCLGVFGLSLYTTER	OS=Mus musculus GN=Tra2b	1.47434e-07	7.08201e-07	0.356694	4.8035	2.26409
	Psma6	IGIDEEQGPQVYK	OS=Mus musculus GN=Psma6	3.51219e-06	1.68608e-05	0.285151	4.80067	2.26324
	Tomm34	VSDSVEQLR	OS=Mus musculus GN=Tomm34	1.47434e-07	7.0705e-07	0.375297	4.79569	2.26174
	Ckap5	LHIVALIAQK	OS=Mus musculus GN=Ckap5	7.83666e-07	3.74869e-06	0.266964	4.78353	2.25808
	Rars	ILDDLFLHTL	OS=Mus musculus GN=Rars	2.56652e-06	1.222e-05	0.437718	4.7613	2.25136
	Lrrfip1	DANEELNCQDPDVGDMEEEER	OS=Mus musculus GN=Lrrfip1	1.47434e-07	7.01645e-07	0.371144	4.75903	2.25067
	Tsr1	AYLFAHVADFVPSEESDLVGTLK	OS=Mus musculus GN=Tsr1	8.10131e-07	3.81001e-06	0.335018	4.70295	2.23357
	Fasn	YEAIVDGGINPASLR	OS=Mus musculus GN=Fasn	2.17021e-06	1.00979e-05	0.320012	4.65298	2.21815
	Myh9	THEAQIQEMR	OS=Mus musculus GN=Myh9	1.47434e-07	6.84868e-07	0.3536	4.64524	2.21575
	Psmc3	QIQELVEAIVLPMNHK	OS=Mus musculus GN=Psmc3	1.47434e-07	6.81612e-07	0.372912	4.62315	2.20888
	Cct2	TVYGGGCSEMLMAHAVTQLANR	OS=Mus musculus GN=Cct2	1.45018e-06	6.69219e-06	0.175042	4.61473	2.20625
	Ubxn1	EKAEELAAR	OS=Mus musculus GN=Ubxn1	2.69516e-07	1.24351e-06	0.435813	4.61386	2.20598
	Ppid	FEDENFHYK	OS=Mus musculus GN=Ppid	1.53894e-05	7.10005e-05	0.0428165	4.61361	2.2059
	Hnrnpr	LCDSYEIRPGK	OS=Mus musculus GN=Hnrnpr	1.47434e-07	6.79042e-07	0.372658	4.60572	2.20343
	Edc4	ELAELWHNQEELLQR	OS=Mus musculus GN=Edc4	1.47434e-07	6.71454e-07	0.351687	4.55426	2.18722
	Ddx54	ELPQEEEEEMVETVEGVFTEVVGQK	OS=Mus musculus GN=Ddx54	1.47434e-07	6.67615e-07	0.35112	4.52822	2.17894
	Uba6	NLPTMTTESLEIDDGLYSR	OS=Mus musculus GN=Uba6	1.47434e-07	6.64409e-07	0.371158	4.50647	2.172
	Rps5	ADELINAAK	OS=Mus musculus GN=Rps5	6.49286e-06	2.90941e-05	0.165071	4.48094	2.1638
	Pes1	YYVQPQWVFDCVNAR	OS=Mus musculus GN=Pes1	1.47434e-07	6.59605e-07	0.349907	4.47389	2.16153
	Hnrnpf	RVHIEIGPDGR	OS=Mus musculus GN=Hnrnpf	2.61436e-06	1.16876e-05	0.0340157	4.47055	2.16045
	Uba5	EGVCAASLPTTMGVVAGILVQNVLK	OS=Mus musculus GN=Uba5	1.47434e-07	6.55267e-07	0.349233	4.44446	2.15201
	Npepps	QMGFPLIYVEAEQVEDDR	OS=Mus musculus GN=Npepps	1.47434e-07	6.55041e-07	0.37015	4.44293	2.15151
	Atxn2	REEIMESVLFK	OS=Mus musculus GN=Atxn2	1.11896e-06	4.96866e-06	0.0180685	4.44044	2.1507
	Anxa3	GELSGHFEDLLLAIVHCAR	OS=Mus musculus GN=Anxa3	1.47434e-07	6.53429e-07	0.365921	4.432	2.14796
	Hnrnpd	FKEEEPVKK	OS=Mus musculus GN=Hnrnpd	3.76605e-06	1.6649e-05	0.252956	4.42081	2.14431
	Ptpn23	LLSGPLDQVR	OS=Mus musculus GN=Ptpn23	1.47434e-07	6.50481e-07	0.369645	4.412	2.14143
	Anp32a	LLPQVMYLDGYDR	OS=Mus musculus GN=Anp32a	1.47434e-07	6.49553e-07	0.365455	4.40571	2.13937
	Fdps	PGIGLDAINDALLL	OS=Mus musculus GN=Fdps	7.36385e-07	3.23923e-06	0.471206	4.39882	2.13712
	Nudc	ELTDEEAER	OS=Mus musculus GN=Nudc	1.47434e-07	6.48306e-07	0.365304	4.39725	2.1366
	Mta1	DFTDIQQDFLPWK	OS=Mus musculus GN=Mta1	3.12718e-06	1.37022e-05	0.0365605	4.38164	2.13147
	Prkar2b	AATITATSPGALWGLDR	OS=Mus musculus GN=Prkar2b	1.47434e-07	6.43839e-07	0.347397	4.36695	2.12663
	Hdlbp	DLANIAEVEVSIPAK	OS=Mus musculus GN=Hdlbp	1.47434e-07	6.42692e-07	0.364611	4.35917	2.12405
	Rpl3	VACIGAWHPAR	OS=Mus musculus GN=Rpl3	1.47434e-07	6.40078e-07	0.346772	4.34144	2.11817
	Pcna	IADMGHLK	OS=Mus musculus GN=Pcna	7.39294e-06	3.20444e-05	0.0436012	4.33447	2.11585
	Ide	TEQWYGTQYK	OS=Mus musculus GN=Ide	6.32492e-07	2.72789e-06	0.0240314	4.31293	2.10867
	mKIAA0224	SSDDTPLPTPSYK	OS=Mus musculus GN=mKIAA0224	1.59952e-06	6.87142e-06	0.208001	4.29593	2.10297
	Pcna	MPSGEFAR	OS=Mus musculus GN=Pcna	2.44414e-05	0.000104635	0.0366719	4.28104	2.09796
	Pabpc1	KSGVGNIFIK	OS=Mus musculus GN=Pabpc1	9.09465e-07	3.88631e-06	0.211134	4.27318	2.09531
	Arcn1	LFTAESLIGLK	OS=Mus musculus GN=Arcn1	1.47434e-07	6.27995e-07	0.344694	4.25949	2.09068
	Serbp1	EETQPPVALKK	OS=Mus musculus GN=Serbp1	8.01952e-06	3.40993e-05	0.00549248	4.25204	2.08815
	Psma3	IIYIVHDEVKDK	OS=Mus musculus GN=Psma3	1.47434e-07	6.25943e-07	0.34433	4.24557	2.08596
	Npc2	SGINCPIQK	OS=Mus musculus GN=Npc2	7.35667e-06	3.11461e-05	0.0408985	4.23372	2.08193
	Vcpip1	EFNIPPYLQCIR	OS=Mus musculus GN=Vcpip1	1.47434e-07	6.16324e-07	0.365531	4.18033	2.06362
	Psmd9	GIGMNEPLVDCEGYPR	OS=Mus musculus GN=Psmd9	1.62689e-06	6.79164e-06	0.0779999	4.17461	2.06164
	Eftud2	GNEEAQIFRPLK	OS=Mus musculus GN=Eftud2	1.46181e-06	6.09993e-06	0.234763	4.17287	2.06104
	Nln	MSELCIDFNK	OS=Mus musculus GN=Nln	4.5059e-07	1.86914e-06	0.441607	4.14822	2.05249
	Nudt3	LVGIFENQER	OS=Mus musculus GN=Nudt3	5.66925e-07	2.34167e-06	0.205989	4.13048	2.04631
	Eef2	GEGQLSAAER	OS=Mus musculus GN=Eef2	2.65304e-05	0.000109395	0.111806	4.12338	2.04383
	Dhx9	QISRPSAAGINLMIGSVR	OS=Mus musculus GN=Dhx9	1.47434e-07	5.9738e-07	0.362962	4.05184	2.01858
	Dhx30	ENYLEENLLYAPSLR	OS=Mus musculus GN=Dhx30	2.43256e-06	9.81106e-06	0.0467628	4.03323	2.01194
	Tpm4	AQEQLATALQNLEEAEK	OS=Mus musculus GN=Tpm4	1.47434e-07	5.93546e-07	0.357755	4.02583	2.00929
	Psmd12	KGSSETPATDVFSSTEEGEKR	OS=Mus musculus GN=Psmd12	3.08811e-06	1.23598e-05	0.163301	4.00238	2.00086
	Me1	DMAAFNERPIIF	OS=Mus musculus GN=Me1	1.85039e-06	7.39015e-06	0.468861	3.99383	1.99777
	GAPDH	VEIVAINDPFIDLNY	OS=Mus musculus GN=GAPDH	6.16759e-06	2.46018e-05	0.303795	3.98889	1.99599
	Arhgef2	NDESPLGLR	OS=Mus musculus GN=Arhgef2	1.3304e-06	5.29755e-06	0.0452228	3.98193	1.99347
	Uba1	NFAMIGLGCGEGGEVVVTDMDTIEK	OS=Mus musculus GN=Uba1	6.24098e-07	2.47551e-06	0.335359	3.96654	1.98788
	Pa2g4	IDLGVHVDGFIAN	OS=Mus musculus GN=Pa2g4	3.04769e-06	1.20858e-05	0.359536	3.96557	1.98753
	Ckap5	EGLDEVAGIINEAK	OS=Mus musculus GN=Ckap5	5.32091e-07	2.09463e-06	0.460138	3.9366	1.97695
	Wdr4	VWDVVFEEAR	OS=Mus musculus GN=Wdr4	1.47434e-07	5.76903e-07	0.334496	3.91295	1.96826
	Eif3i	HVLTGSADNSCR	OS=Mus musculus GN=Eif3i	3.95678e-07	1.54728e-06	0.43611	3.91045	1.96733
	Tagln2	GPSYGLSR	OS=Mus musculus GN=Tagln2	5.3048e-06	2.06992e-05	0.0630845	3.90198	1.96421
	Ppp6r3	FADQDDIGNVSFDR	OS=Mus musculus GN=Ppp6r3	1.47434e-07	5.7436e-07	0.359513	3.8957	1.96188
	Atp6v1b2	SGQVLEVSGSK	OS=Mus musculus GN=Atp6v1b2	1.47434e-07	5.73918e-07	0.359443	3.8927	1.96077
	Nat10	EHLEALFLPYDLK	OS=Mus musculus GN=Nat10	1.47434e-07	5.73685e-07	0.333764	3.89112	1.96019
	Wdr70	LVTGGYDYDVK	OS=Mus musculus GN=Wdr70	1.47434e-07	5.70956e-07	0.333134	3.87261	1.95331
	Sptbn1	INAVVETGR	OS=Mus musculus GN=Sptbn1	2.48277e-06	9.60945e-06	0.0768096	3.87046	1.9525
	Ubxn4	NTELCETPATSDIK	OS=Mus musculus GN=Ubxn4	2.34943e-06	9.08297e-06	0.278292	3.86603	1.95085
	Vars	LHTYLAGDAPTLADLA	OS=Mus musculus GN=Vars	3.01769e-06	1.16508e-05	0.458042	3.86085	1.94892
	Tpi1	TATPQQAQEVHEK	OS=Mus musculus GN=Tpi1	1.15924e-05	4.46307e-05	0.34979	3.84999	1.94486
	Ptma	EVVEEAENGR	OS=Mus musculus GN=Ptma	1.70721e-05	6.57172e-05	0.354324	3.8494	1.94463
	Hars	GQFDPMIPDAECLK	OS=Mus musculus GN=Hars	1.80091e-06	6.92357e-06	0.321789	3.84448	1.94279
	Tfip11	SFMDFGSWER	OS=Mus musculus GN=Tfip11	1.47434e-07	5.66277e-07	0.358206	3.84088	1.94144
	Eif4a1	ATMPSDVLEVTK	OS=Mus musculus GN=Eif4a1	1.38086e-05	5.29676e-05	0.311766	3.83585	1.93955
	Mvp	AIETEAELER	OS=Mus musculus GN=Mvp	4.45257e-06	1.7074e-05	0.0966246	3.83464	1.93909
	Slc3a2	VAEDETEAGVK	OS=Mus musculus GN=Slc3a2	8.0115e-07	3.07145e-06	0.306482	3.8338	1.93877
	Tjp2	YQEEGPVPQPR	OS=Mus musculus GN=Tjp2	6.4712e-06	2.47716e-05	0.0570912	3.82797	1.93658
	Ipo5	HFADLLPGFL	OS=Mus musculus GN=Ipo5	9.96657e-07	3.81044e-06	0.361799	3.82322	1.93479
	Eif5a	NDFQLIGIQDGYLSLLQDSGEVR	OS=Mus musculus GN=Eif5a	2.99099e-06	1.14157e-05	0.435013	3.81671	1.93233
	Tln1	PEDPTVIAENELLGAAAAIEAAAK	OS=Mus musculus GN=Tln1	1.47434e-07	5.61496e-07	0.357407	3.80845	1.9292
	Itga6	YTQELTLNR	OS=Mus musculus GN=Itga6	2.12499e-06	8.07932e-06	0.093693	3.80205	1.92678
	Ap1b1	CVSTLLDLIQTK	OS=Mus musculus GN=Ap1b1	1.86988e-06	7.10366e-06	0.0713477	3.79899	1.92562
	Rps3a1	ADLQNDEVAFR	OS=Mus musculus GN=Rps3a1	1.83943e-05	6.97628e-05	0.0515564	3.79263	1.9232
	Sfpq	FATHAAALSVR	OS=Mus musculus GN=Sfpq	3.56531e-06	1.33894e-05	0.509767	3.75546	1.90899
	Ctbp1	PLVALLDGR	OS=Mus musculus GN=Ctbp1	1.47434e-07	5.51817e-07	0.328454	3.7428	1.90412
	Ptma	VAEDDEDDDVDTKK	OS=Mus musculus GN=Ptma	1.90596e-05	7.11844e-05	0.20804	3.73483	1.90104
	Hacd3	RPLFLAPDFDR	OS=Mus musculus GN=Hacd3	1.80655e-06	6.72806e-06	0.0968354	3.72425	1.89695
	Anp32b	GLFSVSDLPK	OS=Mus musculus GN=Anp32b	1.47434e-07	5.4901e-07	0.327726	3.72376	1.89676
	Nrbp1	TPTPEPAEVETR	OS=Mus musculus GN=Nrbp1	6.38845e-06	2.37416e-05	0.108128	3.71633	1.89388
	Tagln2	CREDVGQPQPGR	OS=Mus musculus GN=Tagln2	4.86712e-06	1.80338e-05	0.278725	3.70523	1.88956
	Idh2	TIEAEAAHGTVTR	OS=Mus musculus GN=Idh2	3.4783e-06	1.28116e-05	0.267755	3.68331	1.881
	Prpsap2	VQIQESVR	OS=Mus musculus GN=Prpsap2	1.17668e-06	4.33312e-06	0.240142	3.68249	1.88068
	Ptrf	SFTPDHVVYAR	OS=Mus musculus GN=Ptrf	9.691e-07	3.56778e-06	0.251831	3.68154	1.88031
	Eef1a1	DGSASGTTL	OS=Mus musculus GN=Eef1a1	1.74535e-06	6.41189e-06	0.253684	3.67369	1.87723
	Ddx24	HPEIVIATPGR	OS=Mus musculus GN=Ddx24	1.47434e-07	5.3867e-07	0.353304	3.65362	1.86933
	Ezr	GTDLWLGVDAL	OS=Mus musculus GN=Ezr	2.76187e-05	0.0001009	0.130998	3.65332	1.86921
	Ezr	RKEDEVEEWQHR	OS=Mus musculus GN=Ezr	1.13862e-06	4.15404e-06	0.0431791	3.64831	1.86723
	Rpl23a	KLYDIDVAK	OS=Mus musculus GN=Rpl23a	7.45126e-06	2.71374e-05	0.068485	3.64198	1.86472
	Rpl8	DIIHDPGR	OS=Mus musculus GN=Rpl8	3.69626e-05	0.000134351	0.092186	3.6348	1.86187
	Wdhd1	VVDVMDNSQQQTFR	OS=Mus musculus GN=Wdhd1	2.57336e-06	9.33528e-06	0.0520764	3.62767	1.85904
	Krt77	NKYEDEINKR	OS=Mus musculus GN=Krt77	1.04846e-05	3.79836e-05	0.110756	3.62281	1.85711
	Flnb	EFLDHESIK	OS=Mus musculus GN=Flnb	3.65951e-06	1.32383e-05	0.350989	3.61749	1.85499
	Eprs	LNQWCNVVR	OS=Mus musculus GN=Eprs	6.9187e-06	2.4816e-05	0.0651177	3.5868	1.8427
	Npm1	SAPGGGNKVPQK	OS=Mus musculus GN=Npm1	1.27621e-05	4.5699e-05	0.0799431	3.58085	1.8403
	Rpl26	TVHVGIHPSK	OS=Mus musculus GN=Rpl26	1.8397e-05	6.57717e-05	0.109902	3.57513	1.838
	Gmps	ESQSVEEALK	OS=Mus musculus GN=Gmps	4.18431e-06	1.49191e-05	0.273427	3.56549	1.8341
	Ppp2cb	GGWGISPR	OS=Mus musculus GN=Ppp2cb	1.75578e-05	6.25366e-05	0.0654422	3.56175	1.83259
	Ola1	QLEYFFTAGPDEVR	OS=Mus musculus GN=Ola1	3.37894e-06	1.2034e-05	0.424473	3.56148	1.83248
	Myof	LNSETDITPK	OS=Mus musculus GN=Myof	2.33042e-06	8.28243e-06	0.11176	3.55406	1.82947
	Hsp90b1	SGTSEFLNK	OS=Mus musculus GN=Hsp90b1	9.79729e-07	3.47393e-06	0.26148	3.54581	1.82612
	Ddb1	MVYPEEAEPK	OS=Mus musculus GN=Ddb1	3.77914e-06	1.33845e-05	0.0925548	3.54168	1.82443
	Lrpprc	DLPITEAVFSALVTGH	OS=Mus musculus GN=Lrpprc	1.47434e-07	5.2175e-07	0.320036	3.53886	1.82329
	Ap3b1	PAPLLESPFK	OS=Mus musculus GN=Ap3b1	3.76873e-06	1.32746e-05	0.0652516	3.52231	1.81652
	Hspa5	VLEDSDLKK	OS=Mus musculus GN=Hspa5	8.78137e-06	3.09264e-05	0.12278	3.52181	1.81632
	Hnrnpul2	ANFETEEVELSFSK	OS=Mus musculus GN=Hnrnpul2	3.84323e-06	1.34796e-05	0.0968813	3.50737	1.81039
	Dhx15	SLMSADNVR	OS=Mus musculus GN=Dhx15	6.11504e-06	2.14449e-05	0.0882122	3.50691	1.8102
	Mcm3	EISDHVLR	OS=Mus musculus GN=Mcm3	2.33573e-06	8.18312e-06	0.0518388	3.50345	1.80878
	Psmc6	MDEIDAIGGR	OS=Mus musculus GN=Psmc6	1.12243e-05	3.92694e-05	0.126368	3.4986	1.80678
	Ppp2r1a	VIMGLSPILGK	OS=Mus musculus GN=Ppp2r1a	3.52783e-06	1.23259e-05	0.347138	3.49389	1.80484
	Dhx15	VIVMSATLDAGK	OS=Mus musculus GN=Dhx15	1.59806e-06	5.5813e-06	0.51197	3.49254	1.80428
	Gars	YPLFEGQETGKK	OS=Mus musculus GN=Gars	1.66318e-06	5.80104e-06	0.116233	3.48791	1.80236
	Pkm	PKPHSEAGTAF	OS=Mus musculus GN=Pkm	9.76596e-05	0.000338173	0.0794965	3.46277	1.79193
	Vapa	FKGPFTDVVTTNLK	OS=Mus musculus GN=Vapa	1.64827e-06	5.70367e-06	0.363722	3.46039	1.79094
	Capzb	DYLLCDYNR	OS=Mus musculus GN=Capzb	2.17454e-06	7.50894e-06	0.0783864	3.45311	1.7879
	Tmed7	SEITFELPDNAK	OS=Mus musculus GN=Tmed7	6.29625e-06	2.17323e-05	0.0707046	3.45162	1.78727
	Eif3a	NICQQVNIK	OS=Mus musculus GN=Eif3a	6.11494e-06	2.10624e-05	0.0731693	3.44441	1.78426
	Nans	PLNPNFCFLQCTSAYPLQPEDANLR	OS=Mus musculus GN=Nans	1.47434e-07	5.0412e-07	0.314371	3.41928	1.77369
	Xpo1	HWPTFISDIVGA	OS=Mus musculus GN=Xpo1	2.38409e-06	8.15186e-06	0.163445	3.41928	1.77369
	Smc1a	SKLESELANFGPR	OS=Mus musculus GN=Smc1a	3.06098e-06	1.04422e-05	0.0664406	3.41137	1.77035
	Cpsf6	QFLSQFEMQSR	OS=Mus musculus GN=Cpsf6	1.47434e-07	5.01501e-07	0.3454	3.40152	1.76618
	Rpl3	LEQQVPVNQ	OS=Mus musculus GN=Rpl3	8.972e-06	3.04458e-05	0.0777889	3.39343	1.76274
	Myg1	LPLPEPWR	OS=Mus musculus GN=Myg1	5.86749e-06	1.98137e-05	0.0763918	3.37686	1.75568
	Rab1	KVVDYTTAK	OS=Mus musculus GN=Rab1	2.31362e-06	7.79173e-06	0.159175	3.36777	1.7518
	Qars	FDDTNPEKEEAK	OS=Mus musculus GN=Qars	2.10743e-06	7.09402e-06	0.279905	3.3662	1.75112
	Saal1	SENLEGLDVYMR	OS=Mus musculus GN=Saal1	1.24639e-06	4.18289e-06	0.0692746	3.35599	1.74674
	Ube2k	IPETYPFNPPK	OS=Mus musculus GN=Ube2k	2.45351e-05	8.2235e-05	0.139025	3.35172	1.7449
	Anp32e	SDNIISGGLEVLAEK	OS=Mus musculus GN=Anp32e	1.47434e-07	4.93757e-07	0.310744	3.349	1.74373
	Rab1b	NATNVEQAFMTMAAEIK	OS=Mus musculus GN=Rab1b	1.11134e-06	3.72066e-06	0.40848	3.3479	1.74326
	Gnas	ALWEDEGVR	OS=Mus musculus GN=Gnas	6.26882e-06	2.09635e-05	0.0902757	3.34409	1.74161
	Ywhab	KEMQPTHPIR	OS=Mus musculus GN=Ywhab	8.41338e-07	2.81292e-06	0.403014	3.34339	1.74131
	Nme1	FQPEELVEYK	OS=Mus musculus GN=Nme1	0.000124299	0.000414442	0.0970769	3.33423	1.73735
	Xrcc5	KNEEEDIVEDLFPTSK	OS=Mus musculus GN=Xrcc5	1.60016e-06	5.32331e-06	0.123922	3.32673	1.73411
	Hnrnpa3	FDDHDTVDK	OS=Mus musculus GN=Hnrnpa3	6.91183e-06	2.29786e-05	0.214753	3.32453	1.73315
	Ctbp1	DAPNLICTPH	OS=Mus musculus GN=Ctbp1	6.78856e-06	2.25211e-05	0.0896302	3.31751	1.7301
	Pafah1b1	EWIPRPPEK	OS=Mus musculus GN=Pafah1b1	7.43971e-06	2.46059e-05	0.140047	3.30738	1.72569
	Dbi	TQPTDEEMLFIYSHFK	OS=Mus musculus GN=Dbi	1.47434e-07	4.87455e-07	0.308418	3.30625	1.7252
	Npm3	MLCLTEGATDECNVVEVVAR	OS=Mus musculus GN=Npm3	2.24651e-06	7.42307e-06	0.291558	3.30427	1.72433
	Prpsap2	TVDISMILSEAIR	OS=Mus musculus GN=Prpsap2	1.48284e-06	4.8969e-06	0.0763215	3.30237	1.7235
	Aamp	APVLLAGTADGNTWMWK	OS=Mus musculus GN=Aamp	1.47434e-07	4.84616e-07	0.341187	3.28699	1.71677
	env	DCEEPLTSYTPR	OS=Mus musculus GN=env	3.40975e-06	1.11887e-05	0.101796	3.28138	1.7143
	Ldha	ILGQNGISDVVK	OS=Mus musculus GN=Ldha	5.61814e-06	1.84268e-05	0.129287	3.27988	1.71365
	Eif3c	LGSLVENNER	OS=Mus musculus GN=Eif3c	2.80751e-06	9.16468e-06	0.322877	3.26434	1.70679
	Rps3	TQNVLGEK	OS=Mus musculus GN=Rps3	1.14428e-05	3.73317e-05	0.125848	3.26245	1.70596
	Rpl10	FNADEFEDMVAEKR	OS=Mus musculus GN=Rpl10	9.86148e-07	3.21362e-06	0.264691	3.25876	1.70432
	Eif6	QVPLVAGTVNR	OS=Mus musculus GN=Eif6	5.39901e-06	1.75617e-05	0.087575	3.25277	1.70167
	Rpl31	EMGTPDVR	OS=Mus musculus GN=Rpl31	1.60305e-05	5.2116e-05	0.301199	3.25104	1.7009
	Nfkb2	IERPVTVFLQLK	OS=Mus musculus GN=Nfkb2	7.89202e-07	2.56357e-06	0.28867	3.2483	1.69969
	Ahnak	DVDLNVAAPK	OS=Mus musculus GN=Ahnak	9.15223e-06	2.97274e-05	0.0888587	3.24811	1.6996
	Hdlbp	TEIVFTGEK	OS=Mus musculus GN=Hdlbp	1.39693e-06	4.53302e-06	0.076701	3.24498	1.69821
	Sptan1	DLSSVQTLLTK	OS=Mus musculus GN=Sptan1	1.47434e-07	4.76383e-07	0.304092	3.23115	1.69205
	Sf3a3	ENPSEEAQNLVEFTDEEGYGR	OS=Mus musculus GN=Sf3a3	9.41761e-07	3.04067e-06	0.0623493	3.22871	1.69096
	Psmd6	EVLHSLPAVR	OS=Mus musculus GN=Psmd6	2.11105e-06	6.8028e-06	0.370938	3.22247	1.68817
	S100a4	VMSNLDSNR	OS=Mus musculus GN=S100a4	1.33088e-06	4.28153e-06	0.19281	3.21708	1.68575
	Flna	GPGLQGGNAGSPAR	OS=Mus musculus GN=Flna	1.63533e-05	5.24432e-05	0.107107	3.2069	1.68118
	Qars	FAEGEATLR	OS=Mus musculus GN=Qars	6.27567e-06	2.01099e-05	0.318274	3.20442	1.68007
	Itga3	VGNAILHPTDIITVVTGAPR	OS=Mus musculus GN=Itga3	2.31823e-06	7.42742e-06	0.330568	3.20392	1.67984
	Nup93	FTSDTKPIINK	OS=Mus musculus GN=Nup93	7.19953e-07	2.3051e-06	0.0707272	3.20174	1.67886
	Ddx50	TFSFAIPLIER	OS=Mus musculus GN=Ddx50	1.47434e-07	4.7095e-07	0.337427	3.1943	1.6755
	Wdr12	VLSVDWTDTGLLLSGGADNK	OS=Mus musculus GN=Wdr12	4.15416e-06	1.32398e-05	0.151191	3.18712	1.67225
	Gm806	VSEGPLSALELAHLSQPQKR	OS=Mus musculus GN=Gm806	1.08038e-06	3.43505e-06	0.393865	3.17947	1.66879
	Ptbp1	IIVENLFYPVTLDVLHQ	OS=Mus musculus GN=Ptbp1	2.74822e-06	8.7242e-06	0.417387	3.17449	1.66653
	Atic	YGMNPHQTPAQLY	OS=Mus musculus GN=Atic	5.81865e-05	0.000184536	0.0982272	3.17146	1.66515
	Colgalt1	TPAYIPIR	OS=Mus musculus GN=Colgalt1	4.31872e-06	1.36871e-05	0.0916091	3.16924	1.66414
	Prpf8	FSPIPFPPLSYK	OS=Mus musculus GN=Prpf8	5.1585e-06	1.62476e-05	0.101414	3.14967	1.6552
	Srsf1	KEDMTYAVR	OS=Mus musculus GN=Srsf1	3.37913e-06	1.06317e-05	0.124203	3.14629	1.65365
	Ap1m1	SGYQALPWVR	OS=Mus musculus GN=Ap1m1	7.25968e-06	2.27837e-05	0.0995778	3.13839	1.65002
	Ogt	EQGNIEEAVR	OS=Mus musculus GN=Ogt	9.05361e-07	2.84064e-06	0.0742298	3.13758	1.64965
	Ncapd2	LSDIDLAGPLQK	OS=Mus musculus GN=Ncapd2	4.74121e-06	1.48735e-05	0.157481	3.13707	1.64942
	Mettl1	AHSNPMADHTLR	OS=Mus musculus GN=Mettl1	1.1454e-06	3.59092e-06	0.0857645	3.13508	1.6485
	Nutf2	TWEGQQFQGK	OS=Mus musculus GN=Nutf2	7.86882e-06	2.46418e-05	0.0999066	3.13158	1.64689
	Xpo1	SNIMYIVGQYPR	OS=Mus musculus GN=Xpo1	2.81137e-06	8.79889e-06	0.104053	3.12975	1.64605
	Calm1	DTDSEEEIR	OS=Mus musculus GN=Calm1	3.02373e-06	9.4628e-06	0.307815	3.12951	1.64594
	Mybbp1a	NSSLTVPMFLSLFSR	OS=Mus musculus GN=Mybbp1a	1.70997e-05	5.34035e-05	0.180986	3.12307	1.64296
	Dnajc13	VASATETLK	OS=Mus musculus GN=Dnajc13	1.17002e-05	3.65154e-05	0.0505373	3.12093	1.64198
	Nob1	APVEHVVADAGAFLR	OS=Mus musculus GN=Nob1	8.85383e-07	2.76052e-06	0.422463	3.11788	1.64056
	Ythdf1	HTTSIFDDFSHYEK	OS=Mus musculus GN=Ythdf1	5.6985e-06	1.77607e-05	0.123894	3.11673	1.64003
	Cfl1	MLPDKDCR	OS=Mus musculus GN=Cfl1	4.34284e-05	0.000135169	0.328832	3.11245	1.63805
	Flnc	KGELTGEVR	OS=Mus musculus GN=Flnc	4.94625e-06	1.53856e-05	0.353595	3.11055	1.63717
	Rab10	NIDEHANEDVER	OS=Mus musculus GN=Rab10	4.92403e-06	1.52948e-05	0.168988	3.10616	1.63513
	Sgta	TPPSEEDSAEAER	OS=Mus musculus GN=Sgta	1.49964e-06	4.63813e-06	0.298674	3.09282	1.62892
	Psma3	AVENSSTAIGIR	OS=Mus musculus GN=Psma3	5.09281e-05	0.000157108	0.169785	3.0849	1.62522
	Hnrnpl	IEYAKPTR	OS=Mus musculus GN=Hnrnpl	3.56593e-06	1.09964e-05	0.310394	3.08373	1.62468
	Zc3h18	DVVTPLSTLLPPIPN	OS=Mus musculus GN=Zc3h18	1.47434e-07	4.53955e-07	0.332242	3.07903	1.62248
	Ldha	LLIVSNPVDIL	OS=Mus musculus GN=Ldha	0.000148694	0.000456915	0.464573	3.07285	1.61958
	Actb	SYVGDEAQSK	OS=Mus musculus GN=Actb	4.76768e-06	1.46288e-05	0.298831	3.06833	1.61745
	Tuba1b	GMEEGEFSEAR	OS=Mus musculus GN=Tuba1b	9.4954e-06	2.90848e-05	0.141526	3.06304	1.61497
	Smc4	TVINETTTR	OS=Mus musculus GN=Smc4	2.77134e-06	8.48341e-06	0.186976	3.06113	1.61406
	Nrd1	LAHEIEALK	OS=Mus musculus GN=Nrd1	1.47434e-07	4.50423e-07	0.32387	3.05507	1.61121
	Ran	VWDTAGQEK	OS=Mus musculus GN=Ran	1.60552e-05	4.89322e-05	0.268848	3.04775	1.60775
	Tpm1	AELSEGQVR	OS=Mus musculus GN=Tpm1	8.69594e-06	2.64978e-05	0.319976	3.04715	1.60746
	Mthfd1l	LSGGSPGVPVDK	OS=Mus musculus GN=Mthfd1l	1.76025e-06	5.36166e-06	0.100121	3.04597	1.6069
	Myh9	DLEAHIDTANK	OS=Mus musculus GN=Myh9	1.43104e-05	4.35025e-05	0.258233	3.03992	1.60404
	Hnrnpa1	FDDHDSVDK	OS=Mus musculus GN=Hnrnpa1	5.64332e-06	1.71198e-05	0.219548	3.03363	1.60105
	Pfdn5	LHDVEHVLIDVGTGYYVEK	OS=Mus musculus GN=Pfdn5	5.85763e-07	1.77345e-06	0.502556	3.02759	1.59817
	Tjp2	AEQMASVQNAQR	OS=Mus musculus GN=Tjp2	2.10437e-06	6.37073e-06	0.333052	3.02738	1.59807
	Ncl	TSTWSGESK	OS=Mus musculus GN=Ncl	1.47434e-07	4.46051e-07	0.329611	3.02542	1.59714
	Tomm22	LWGLTEMFPER	OS=Mus musculus GN=Tomm22	2.06227e-06	6.22453e-06	0.161354	3.01829	1.59373
	Rpl10	MVSDEYEQLSSEALEAAR	OS=Mus musculus GN=Rpl10	1.37107e-06	4.13806e-06	0.298005	3.01813	1.59365
	Dync1h1	ADSVLMEQPPLR	OS=Mus musculus GN=Dync1h1	7.23184e-06	2.18103e-05	0.340805	3.01587	1.59257
	Npm1	TVSLGAGAK	OS=Mus musculus GN=Npm1	2.07128e-05	6.24548e-05	0.326638	3.01528	1.59229
	Hsp90aa1	TDTGEPMGR	OS=Mus musculus GN=Hsp90aa1	1.14153e-05	3.44185e-05	0.241316	3.01513	1.59222
	Rab11fip1	ELEDYIDNLLVR	OS=Mus musculus GN=Rab11fip1	1.47434e-07	4.4413e-07	0.289434	3.01239	1.59091
	Ywhae	RQMVETELK	OS=Mus musculus GN=Ywhae	8.49443e-06	2.55625e-05	0.122041	3.00933	1.58944
	Fscn1	PADEIAVDR	OS=Mus musculus GN=Fscn1	1.16786e-05	3.50853e-05	0.327476	3.00423	1.587
	Trim56	LGPHIDHPCLPLAEAVR	OS=Mus musculus GN=Trim56	2.41098e-06	7.227e-06	0.104921	2.99753	1.58378
	Cct8	ETEGDVTSVK	OS=Mus musculus GN=Cct8	5.11817e-06	1.53411e-05	0.32249	2.99739	1.58371
	Cct5	TSLGPNGLDK	OS=Mus musculus GN=Cct5	4.1528e-06	1.24475e-05	0.279984	2.99737	1.5837
	Cct6a	GFDLQETLVK	OS=Mus musculus GN=Cct6a	3.62131e-06	1.08503e-05	0.3587	2.99623	1.58315
	Fscn1	KVTGTLDANR	OS=Mus musculus GN=Fscn1	2.25821e-06	6.74483e-06	0.535701	2.9868	1.5786
	Npm1	DELHIVEAEAM	OS=Mus musculus GN=Npm1	5.08309e-05	0.000150788	0.421859	2.96647	1.56875
	Fbl	VSISEGDDKIEYR	OS=Mus musculus GN=Fbl	6.79737e-06	2.0164e-05	0.120216	2.96644	1.56873
	Aldh2	AAFQLGSPWR	OS=Mus musculus GN=Aldh2	5.75125e-06	1.70474e-05	0.131722	2.96412	1.5676
	Ldha	DLAESIMK	OS=Mus musculus GN=Ldha	2.4433e-05	7.24108e-05	0.0875239	2.96365	1.56738
	Rps5	VAETPDIK	OS=Mus musculus GN=Rps5	4.02769e-05	0.000119113	0.340806	2.95734	1.5643
	Hnrnpf	KATENDIYNFFSPLNPVR	OS=Mus musculus GN=Hnrnpf	2.09504e-06	6.19409e-06	0.168282	2.95655	1.56391
	Anxa5	ETSGNLEQLLLA	OS=Mus musculus GN=Anxa5	4.12582e-06	1.21485e-05	0.494181	2.9445	1.55802
	Trip12	LFLQFVTGSPR	OS=Mus musculus GN=Trip12	6.72501e-07	1.97416e-06	0.270826	2.93555	1.55363
	Top1	GPVFAPPYEPLPESVK	OS=Mus musculus GN=Top1	3.38599e-06	9.93692e-06	0.557604	2.93472	1.55322
	Aacs	NLGMAVEAWDEEGK	OS=Mus musculus GN=Aacs	1.54957e-06	4.54005e-06	0.126562	2.92988	1.55084
	Tubb2b	RISEQFTAM	OS=Mus musculus GN=Tubb2b	8.09898e-06	2.3716e-05	0.349107	2.92828	1.55005
	Usp5	SAAESISESVPVGPK	OS=Mus musculus GN=Usp5	1.64571e-06	4.8163e-06	0.312882	2.92658	1.54922
	Rpl14-ps1	ALVDGPCTR	OS=Mus musculus GN=Rpl14-ps1	4.62544e-05	0.00013513	0.386182	2.92146	1.54669
	Pgk1	FHVEEEGK	OS=Mus musculus GN=Pgk1	1.89471e-05	5.5292e-05	0.293362	2.91823	1.54509
	P4hb	VHSFPTLK	OS=Mus musculus GN=P4hb	1.7663e-06	5.14031e-06	0.317866	2.91021	1.54112
	Vars	ADTELIPAACGATLPALGLR	OS=Mus musculus GN=Vars	2.28355e-06	6.60548e-06	0.416631	2.89264	1.53239
	Sephs1	VPQDVLQK	OS=Mus musculus GN=Sephs1	1.95173e-06	5.64028e-06	0.131069	2.88988	1.53101
	Snrpd3	ETNTGEVYR	OS=Mus musculus GN=Snrpd3	1.98189e-06	5.70689e-06	0.410702	2.87952	1.52583
	Hspa5	ITITNDQNR	OS=Mus musculus GN=Hspa5	1.69174e-05	4.85374e-05	0.114988	2.86908	1.52059
	Ran	VCENIPIVLC	OS=Mus musculus GN=Ran	1.18029e-05	3.3852e-05	0.28902	2.8681	1.5201
	Cltc	MREHLELFWSR	OS=Mus musculus GN=Cltc	1.75181e-06	5.01879e-06	0.270422	2.86491	1.51849
	Hist1h2bj	VHPDTGISSK	OS=Mus musculus GN=Hist1h2bj	1.17531e-05	3.36629e-05	0.336864	2.86418	1.51812
	Nup98	GFLEDLAPPER	OS=Mus musculus GN=Nup98	7.98706e-07	2.28748e-06	0.292338	2.86398	1.51802
	Prdx5	LSVNDVFVIEEWGR	OS=Mus musculus GN=Prdx5	1.90727e-06	5.45084e-06	0.333473	2.85793	1.51497
	Actr2	LEVNYPMENGIVR	OS=Mus musculus GN=Actr2	6.49873e-06	1.85634e-05	0.135478	2.85647	1.51423
	Ufc1	GLGPWLAVEVPDLIQK	OS=Mus musculus GN=Ufc1	7.00461e-06	2.00056e-05	0.146583	2.85606	1.51403
	Syncrip	TGYTLDVTTGQR	OS=Mus musculus GN=Syncrip	7.10618e-06	2.02871e-05	0.341275	2.85486	1.51342
	Isyna1	APLVPPGSPVVNAL	OS=Mus musculus GN=Isyna1	7.98095e-06	2.27785e-05	0.288137	2.85411	1.51304
	Psmb7	ATEGMVVADK	OS=Mus musculus GN=Psmb7	9.27889e-06	2.64784e-05	0.38515	2.85362	1.51279
	Rtcb	NLDFQDVLDK	OS=Mus musculus GN=Rtcb	3.80457e-06	1.08483e-05	0.154551	2.85138	1.51166
	Pura	VSEVKPTYR	OS=Mus musculus GN=Pura	1.82649e-06	5.19473e-06	0.212997	2.8441	1.50797
	Mdh2	GASGGIGQPLSLLLK	OS=Mus musculus GN=Mdh2	1.28751e-05	3.6612e-05	0.201075	2.84362	1.50773
	Rpl9	VDKWWGNRK	OS=Mus musculus GN=Rpl9	5.22499e-06	1.48465e-05	0.379669	2.84145	1.50663
	G3bp1	FYVHNDIFR	OS=Mus musculus GN=G3bp1	3.61809e-06	1.02698e-05	0.329804	2.83847	1.50511
	Ncapd2	ALDPEEEWDAMLPELK	OS=Mus musculus GN=Ncapd2	5.98197e-06	1.69132e-05	0.140885	2.82736	1.49946
	Esyt2	VILEPLIGDMPLVGAL	OS=Mus musculus GN=Esyt2	2.60821e-06	7.35742e-06	0.350443	2.82087	1.49614
	Pcbp1	AGIDSSSPEVK	OS=Mus musculus GN=Pcbp1	2.38359e-06	6.70579e-06	0.231937	2.81332	1.49227
	Msh6	MLKPYTGSK	OS=Mus musculus GN=Msh6	2.35395e-06	6.61852e-06	0.0523843	2.81167	1.49143
	Rcc2	NHTLVLDSQK	OS=Mus musculus GN=Rcc2	4.70898e-06	1.32322e-05	0.329018	2.80999	1.49056
	Krt8	KLLEGEESR	OS=Mus musculus GN=Krt8	1.03623e-05	2.91035e-05	0.350736	2.80861	1.48986
	Sf3b3	TVLDPVTGDLSDTR	OS=Mus musculus GN=Sf3b3	1.79838e-05	5.04842e-05	0.208603	2.80721	1.48914
	Spg20	DWLYPLVPDR	OS=Mus musculus GN=Spg20	3.88689e-06	1.08998e-05	0.139011	2.80423	1.48761
	Fasn	LTQGEVYK	OS=Mus musculus GN=Fasn	4.63372e-06	1.29791e-05	0.351189	2.80101	1.48595
	Rpl21	KKGDIVDIK	OS=Mus musculus GN=Rpl21	2.69736e-05	7.55171e-05	0.371165	2.79967	1.48526
	Ipo7	DGALHMIGSLAEIL	OS=Mus musculus GN=Ipo7	3.17589e-06	8.86769e-06	0.329297	2.79219	1.4814
	Rpl23a	LYDIDVAK	OS=Mus musculus GN=Rpl23a	9.50855e-06	2.6529e-05	0.209938	2.79002	1.48028
	Flnb	VEVGKDQEFAIDTNGAGGQGK	OS=Mus musculus GN=Flnb	2.85372e-06	7.95465e-06	0.348713	2.78747	1.47896
	Anxa2	CIQNKPLYFADR	OS=Mus musculus GN=Anxa2	8.56615e-06	2.38109e-05	0.308786	2.77964	1.4749
	Mov10	LSFSTSLLSR	OS=Mus musculus GN=Mov10	2.30951e-06	6.4103e-06	0.186544	2.77561	1.47281
	Tns3	AGDLSNELVR	OS=Mus musculus GN=Tns3	7.33156e-06	2.03052e-05	0.211419	2.76957	1.46966
	Tkt	GHAAPILYAV	OS=Mus musculus GN=Tkt	1.14143e-05	3.15328e-05	0.371383	2.76257	1.46601
	Ahnak	GPGVDLPSVDLSMPK	OS=Mus musculus GN=Ahnak	6.01531e-05	0.000166096	0.157687	2.76122	1.46531
	Npm1	ADKDYHFK	OS=Mus musculus GN=Npm1	4.2893e-06	1.18429e-05	0.293078	2.76103	1.46521
	Usp47	FLLDAVFAK	OS=Mus musculus GN=Usp47	5.94908e-07	1.64094e-06	0.137909	2.7583	1.46378
	Eml4	EIEVPDQYGTIR	OS=Mus musculus GN=Eml4	5.59775e-06	1.54207e-05	0.213654	2.75479	1.46194
	Rps3	GCEVVVSGK	OS=Mus musculus GN=Rps3	3.73351e-06	1.02815e-05	0.328766	2.75385	1.46145
	Pa2g4	MGVVECAK	OS=Mus musculus GN=Pa2g4	4.63513e-06	1.27075e-05	0.0904693	2.74157	1.455
	Myh10	NKQEVMISDLEER	OS=Mus musculus GN=Myh10	4.12627e-06	1.13081e-05	0.159328	2.74052	1.45445
	Eef1a1	SVEMHHEAL	OS=Mus musculus GN=Eef1a1	4.50472e-05	0.000123442	0.294635	2.74027	1.45432
	Flnb	QEIPASPFR	OS=Mus musculus GN=Flnb	3.02954e-06	8.30072e-06	0.207242	2.73993	1.45414
	Flna	ALTQTGGPHVK	OS=Mus musculus GN=Flna	3.8668e-06	1.05529e-05	0.33481	2.72911	1.44843
	Lsm8	GDNVAVIGEIDEETDSALDLGNIR	OS=Mus musculus GN=Lsm8	7.68213e-06	2.09511e-05	0.0687789	2.72726	1.44745
	Stub1	SPLTQEQLIPNLAMK	OS=Mus musculus GN=Stub1	1.20703e-06	3.2916e-06	0.350315	2.72703	1.44733
	Mthfd1	TSTESEVLK	OS=Mus musculus GN=Mthfd1	2.63941e-06	7.19319e-06	0.364538	2.7253	1.44641
	Eef1a1	FSDYPPLGR	OS=Mus musculus GN=Eef1a1	3.14781e-05	8.57548e-05	0.0841004	2.72426	1.44587
	Actb	VALDFEQEMATAASSSSLEK	OS=Mus musculus GN=Actb	1.16848e-06	3.15842e-06	0.443295	2.70301	1.43457
	Plec	VPGAQDGVR	OS=Mus musculus GN=Plec	3.62645e-06	9.79745e-06	0.355991	2.70167	1.43385
	Pelp1	HASQLPTLFR	OS=Mus musculus GN=Pelp1	5.56687e-06	1.50313e-05	0.222182	2.70013	1.43303
	Exosc1	VHILYVGSTPLK	OS=Mus musculus GN=Exosc1	9.47343e-07	2.55757e-06	0.319187	2.69973	1.43282
	Eci1	SAGLDLLEMYGR	OS=Mus musculus GN=Eci1	1.68589e-06	4.54331e-06	0.326708	2.69491	1.43024
	Cd9	LDCCGIAGPLEQFISDTCPK	OS=Mus musculus GN=Cd9	3.79047e-06	1.01901e-05	0.424454	2.68836	1.42673
	Dnaja2	GEGMPQYR	OS=Mus musculus GN=Dnaja2	3.01437e-06	8.09753e-06	0.363343	2.68631	1.42562
	Calr	FYGDLEKDK	OS=Mus musculus GN=Calr	8.80772e-06	2.35976e-05	0.394318	2.6792	1.4218
	Fh	AIEMLGGELGSK	OS=Mus musculus GN=Fh	3.19687e-06	8.56013e-06	0.356935	2.67766	1.42097
	Snrnp200	DLDQGGEALAPR	OS=Mus musculus GN=Snrnp200	7.02396e-06	1.87817e-05	0.0576222	2.67395	1.41897
	Ahnak	GNLDMSAPK	OS=Mus musculus GN=Ahnak	1.84902e-06	4.93322e-06	0.348378	2.66802	1.41577
	Abcf1	TFKKMYQQKQK	OS=Mus musculus GN=Abcf1	6.07036e-06	1.61871e-05	0.28957	2.66658	1.41499
	Idh3b	DMGGYSTTTDFIK	OS=Mus musculus GN=Idh3b	5.8203e-07	1.55175e-06	0.288646	2.66609	1.41473
	Tcp1	SSFGPVGLDK	OS=Mus musculus GN=Tcp1	9.57606e-06	2.55221e-05	0.373953	2.6652	1.41424
	Esyt1	FEWDLPLDGTLR	OS=Mus musculus GN=Esyt1	4.62952e-06	1.23163e-05	0.16644	2.66038	1.41163
	Hspa8	GTLDPVEK	OS=Mus musculus GN=Hspa8	0.000130496	0.000346957	0.21408	2.65876	1.41075
	Grwd1	REPFLLSGGDDGALK	OS=Mus musculus GN=Grwd1	2.49473e-06	6.62961e-06	0.217502	2.65745	1.41004
	Rpl35	KYKPLDLRP	OS=Mus musculus GN=Rpl35	1.17784e-05	3.12916e-05	0.37282	2.65669	1.40963
	Aars	QLIDSNPNQPLVIL	OS=Mus musculus GN=Aars	9.65193e-06	2.5585e-05	0.17326	2.65076	1.40641
	Epb4.1l2	LVSPEQPPK	OS=Mus musculus GN=Epb4.1l2	3.62005e-06	9.57544e-06	0.370383	2.64511	1.40333
	Ywhaq	EKVESELR	OS=Mus musculus GN=Ywhaq	1.18421e-05	3.13209e-05	0.364755	2.64488	1.4032
	Cct2	IANTGMDTDK	OS=Mus musculus GN=Cct2	3.65642e-06	9.66446e-06	0.388057	2.64315	1.40226
	Glod4	FQTVHFFR	OS=Mus musculus GN=Glod4	2.915e-06	7.67359e-06	0.363971	2.63245	1.3964
	Ncdn	IPILSTFLTAR	OS=Mus musculus GN=Ncdn	1.47434e-07	3.86669e-07	0.252168	2.62265	1.39102
	Naa25	WPECNALSR	OS=Mus musculus GN=Naa25	2.12948e-06	5.57556e-06	0.362044	2.61828	1.38862
	Fkbp3	LEIEPEWAYGK	OS=Mus musculus GN=Fkbp3	2.04266e-05	5.34703e-05	0.395057	2.61768	1.38829
	H13	SSSDMPETITSR	OS=Mus musculus GN=H13	1.75303e-06	4.58204e-06	0.36301	2.61378	1.38614
	Rpl18	ILTFDQLALESPK	OS=Mus musculus GN=Rpl18	1.47434e-07	3.84705e-07	0.250535	2.60933	1.38368
	Cdk11b	EKEGFPITSLR	OS=Mus musculus GN=Cdk11b	1.86592e-06	4.86723e-06	0.357948	2.60849	1.38322
	Dync1h1	QYASYEFVQR	OS=Mus musculus GN=Dync1h1	7.67019e-06	1.99712e-05	0.199461	2.60375	1.38059
	Lmna	QEKEDLQELNDR	OS=Mus musculus GN=Lmna	2.2233e-06	5.78749e-06	0.494366	2.60311	1.38023
	Eif4g1	VEYTLGEESEAPGQR	OS=Mus musculus GN=Eif4g1	4.67509e-06	1.21548e-05	0.208154	2.59991	1.37846
	Tkt	PFTIKPLDR	OS=Mus musculus GN=Tkt	3.03887e-06	7.89838e-06	0.0599799	2.59912	1.37802
	Map1b	SPCDSGYSYETIEK	OS=Mus musculus GN=Map1b	1.36917e-06	3.55792e-06	0.396794	2.59861	1.37774
	Dimt1	SMDIDDFIR	OS=Mus musculus GN=Dimt1	9.75411e-07	2.53043e-06	0.167711	2.59422	1.3753
	Xpo4	SIISNLITVFPR	OS=Mus musculus GN=Xpo4	1.12375e-06	2.91434e-06	0.379687	2.5934	1.37485
	Actb	GVTHTVPIYEGYALPHAILR	OS=Mus musculus GN=Actb	1.20825e-06	3.12942e-06	0.345262	2.59005	1.37298
	Sh3bgrl	GDYDAFFEAR	OS=Mus musculus GN=Sh3bgrl	1.87712e-06	4.85253e-06	0.200646	2.5851	1.37022
	Tuba1b	LISQIVSSIT	OS=Mus musculus GN=Tuba1b	9.98169e-06	2.57597e-05	0.41348	2.5807	1.36776
	Vim	QVDQLTNDK	OS=Mus musculus GN=Vim	3.77336e-06	9.73148e-06	0.589344	2.579	1.36681
	Flna	VTAQGPGLEPSGNIANK	OS=Mus musculus GN=Flna	1.18705e-05	3.06068e-05	0.388623	2.5784	1.36647
	Hsp90b1	EGVKFDESEK	OS=Mus musculus GN=Hsp90b1	5.27401e-06	1.35939e-05	0.24572	2.57753	1.36599
	Reep5	HESQVDSVVK	OS=Mus musculus GN=Reep5	1.12297e-06	2.89225e-06	0.475894	2.57554	1.36488
	Cct3	MHPTVVISAYR	OS=Mus musculus GN=Cct3	9.36476e-06	2.41182e-05	0.146678	2.57542	1.36481
	Dpysl2	GSPLVVISQGK	OS=Mus musculus GN=Dpysl2	1.11913e-05	2.87932e-05	0.22592	2.57281	1.36335
	Bzw1	ELQEQMSR	OS=Mus musculus GN=Bzw1	2.14506e-06	5.5104e-06	0.56611	2.56888	1.36114
	Hist1h3e	FEDTNLCAIHAK	OS=Mus musculus GN=Hist1h3e	2.3154e-05	5.94345e-05	0.482587	2.56692	1.36004
	Plec	AQLEPVASPAK	OS=Mus musculus GN=Plec	3.39426e-06	8.70156e-06	0.0463929	2.56361	1.35818
	Tpm3	HIAEEADR	OS=Mus musculus GN=Tpm3	5.54873e-06	1.42206e-05	0.102876	2.56285	1.35775
	Ndufab1	LMCPQEIVDYIADKK	OS=Mus musculus GN=Ndufab1	1.58393e-06	4.05332e-06	0.169167	2.55902	1.35559
	Rpl7a	DVDPIELVVFLPALCR	OS=Mus musculus GN=Rpl7a	3.20191e-06	8.18956e-06	0.484504	2.55771	1.35485
	Ap1g1	GYSPEHDVSGISDPFLQVR	OS=Mus musculus GN=Ap1g1	2.09156e-06	5.34368e-06	0.475562	2.55488	1.35325
	Eri1	MLQDGCELR	OS=Mus musculus GN=Eri1	2.34169e-06	5.97442e-06	0.0409119	2.55133	1.35125
	Gsn	SLFGGKPMIIYK	OS=Mus musculus GN=Gsn	3.25518e-06	8.28854e-06	0.39017	2.54626	1.34838
	Dlat	GLETIASDVVSL	OS=Mus musculus GN=Dlat	2.81287e-06	7.15659e-06	0.145617	2.54424	1.34723
	Xrn2	LLYMAIDGVAPR	OS=Mus musculus GN=Xrn2	2.29747e-06	5.84267e-06	0.3744	2.54309	1.34658
	Hnrnpu	DEITYVELQK	OS=Mus musculus GN=Hnrnpu	7.89068e-06	2.00659e-05	0.255163	2.54298	1.34652
	N6amt2	SFDLVVADPPYLSEECLR	OS=Mus musculus GN=N6amt2	1.3041e-06	3.31594e-06	0.169226	2.54269	1.34636
	Ssb	ITDDQQESLNK	OS=Mus musculus GN=Ssb	1.29594e-05	3.28914e-05	0.218669	2.53802	1.34371
	Lrpprc	GDVESIEAIQR	OS=Mus musculus GN=Lrpprc	3.89157e-06	9.85633e-06	0.383447	2.53274	1.3407
	Hspa1l	AVITVPAYFNDSQR	OS=Mus musculus GN=Hspa1l	7.39181e-06	1.86764e-05	0.211139	2.52663	1.33722
	Pwp1	ESLEDGDPQDDR	OS=Mus musculus GN=Pwp1	7.06654e-07	1.78416e-06	0.54856	2.5248	1.33617
	Krt8	AQYEDIANR	OS=Mus musculus GN=Krt8	3.74281e-06	9.44811e-06	0.386357	2.52434	1.3359
	Alad	MVKPGLPYLDMVR	OS=Mus musculus GN=Alad	4.78942e-06	1.20398e-05	0.479094	2.51384	1.32989
	Ccar2	TVDSPTCDFLELQR	OS=Mus musculus GN=Ccar2	2.0292e-06	5.08617e-06	0.379356	2.50649	1.32567
	Lrrc47	APGPGLAQGLPQLHSLVLR	OS=Mus musculus GN=Lrrc47	8.91132e-07	2.23111e-06	0.378933	2.50368	1.32405
	Serbp1	RFEKPLEEK	OS=Mus musculus GN=Serbp1	3.8186e-05	9.54552e-05	0.275524	2.49975	1.32178
	Srm	ETCSLWPGQALSLQVEQLLHHR	OS=Mus musculus GN=Srm	1.06055e-06	2.63926e-06	0.366035	2.48857	1.31532
	Hnrnpa1	GTLTDCVVMR	OS=Mus musculus GN=Hnrnpa1	2.41762e-06	6.01483e-06	0.251076	2.48792	1.31494
	Txnl1	FQGPDNGQGPK	OS=Mus musculus GN=Txnl1	1.23475e-06	3.06699e-06	0.366194	2.4839	1.31261
	Flnb	IQQNTFTR	OS=Mus musculus GN=Flnb	2.23086e-05	5.53987e-05	0.158053	2.48329	1.31225
	Eprs	VACQGEVVR	OS=Mus musculus GN=Eprs	1.2862e-06	3.19215e-06	0.36567	2.48184	1.31141
	Fkbp3	GWDEALLTMSK	OS=Mus musculus GN=Fkbp3	2.38901e-06	5.92299e-06	0.385536	2.47926	1.30991
	Srp72	TEEALQLYNQIIK	OS=Mus musculus GN=Srp72	5.58429e-06	1.38278e-05	0.218656	2.47619	1.30812
	Dut	LSEHATAPTR	OS=Mus musculus GN=Dut	1.47434e-07	3.64417e-07	0.289873	2.47172	1.30552
	Gpd1l	LQGPQTSAEVYR	OS=Mus musculus GN=Gpd1l	1.48046e-06	3.65906e-06	0.202533	2.47157	1.30543
	Psmd1	LDDPQAVSDILEK	OS=Mus musculus GN=Psmd1	4.996e-06	1.23425e-05	0.374583	2.47048	1.30479
	Snrpd1	LSHETVTIELK	OS=Mus musculus GN=Snrpd1	2.07637e-05	5.12884e-05	0.183967	2.4701	1.30457
	Sumo1	QGVPMNSLR	OS=Mus musculus GN=Sumo1	1.72886e-06	4.26468e-06	0.0639946	2.46676	1.30262
	Ywhah	KNSVVEASEAAYK	OS=Mus musculus GN=Ywhah	1.06199e-06	2.61922e-06	0.358664	2.46634	1.30237
	Lgals3	IQVLVEADHFK	OS=Mus musculus GN=Lgals3	2.81394e-05	6.93978e-05	0.389563	2.46622	1.3023
	Ube2i	DDYPSSPPK	OS=Mus musculus GN=Ube2i	3.05097e-06	7.51687e-06	0.19254	2.46376	1.30086
	Ahnak	VDIDVPDVDVHGPDWH	OS=Mus musculus GN=Ahnak	3.39988e-06	8.37645e-06	0.209514	2.46375	1.30086
	Rpl15	FHHTIGGSR	OS=Mus musculus GN=Rpl15	8.56636e-06	2.10595e-05	0.0303863	2.4584	1.29772
	Eif4g1	SVTAFFNWLR	OS=Mus musculus GN=Eif4g1	5.68538e-07	1.39756e-06	0.352655	2.45816	1.29758
	Cap1	GAVPYVQAFDSLLANPVAEYLK	OS=Mus musculus GN=Cap1	1.76056e-06	4.32612e-06	0.210604	2.45725	1.29704
	Sqstm1	LTPTTPESSSTGTEDK	OS=Mus musculus GN=Sqstm1	1.72817e-06	4.24617e-06	0.397784	2.45703	1.29692
	Raver1	EPTLGAHGPSR	OS=Mus musculus GN=Raver1	4.65501e-06	1.14286e-05	0.402741	2.45513	1.2958
	Ola1	LQELSAEER	OS=Mus musculus GN=Ola1	7.75291e-06	1.9029e-05	0.0732969	2.45443	1.29539
	Nolc1	AAGGAVSTPAPGK	OS=Mus musculus GN=Nolc1	1.36247e-06	3.3361e-06	0.374875	2.44856	1.29193
	Tln1	TSDPAVQAIVLDTASDVLDK	OS=Mus musculus GN=Tln1	6.71265e-06	1.64334e-05	0.413534	2.44812	1.29167
	Cad	VLSEPNPR	OS=Mus musculus GN=Cad	5.96924e-06	1.46088e-05	0.0937764	2.44735	1.29122
	Tpt1	GKLEEQKPER	OS=Mus musculus GN=Tpt1	2.1305e-05	5.21381e-05	0.156749	2.44722	1.29115
	Rars	GFVQVDDGRK	OS=Mus musculus GN=Rars	4.19767e-06	1.02714e-05	0.423675	2.44694	1.29098
	Hnrnpa2b1	KLFVGGIKEDTEEHHLR	OS=Mus musculus GN=Hnrnpa2b1	1.21461e-05	2.97207e-05	0.413943	2.44694	1.29098
	Rpsa	AATGATPIAGR	OS=Mus musculus GN=Rpsa	2.48076e-05	6.06637e-05	0.18445	2.44537	1.29005
	Hk1	SANLVAATLGAILNR	OS=Mus musculus GN=Hk1	6.89309e-06	1.68469e-05	0.352606	2.44403	1.28926
	Dbnl	VKDPNSGLPK	OS=Mus musculus GN=Dbnl	1.73991e-06	4.24885e-06	0.387742	2.44199	1.28806
	Eftud2	IYADTFGDINYQEFAK	OS=Mus musculus GN=Eftud2	8.02162e-06	1.95545e-05	0.228794	2.43772	1.28553
	Dbi	VEKVDELK	OS=Mus musculus GN=Dbi	6.99737e-06	1.70376e-05	0.0903193	2.43486	1.28384
	S100a10	FAGDKDHLTK	OS=Mus musculus GN=S100a10	2.1917e-05	5.31379e-05	0.104954	2.42451	1.27769
	Prss2	MICVGFLEGGK	OS=Mus musculus GN=Prss2	4.9557e-06	1.19961e-05	0.431824	2.42067	1.27541
	Mtap	TFYDGSHCSAR	OS=Mus musculus GN=Mtap	9.25454e-06	2.23734e-05	0.156889	2.41756	1.27355
	Lmna	STGEEVAMR	OS=Mus musculus GN=Lmna	2.03397e-05	4.91459e-05	0.183829	2.41625	1.27277
	Iars	VREELIDKK	OS=Mus musculus GN=Iars	5.51614e-06	1.33198e-05	0.408957	2.4147	1.27184
	Khsrp	MMLDDIVSR	OS=Mus musculus GN=Khsrp	2.13956e-06	5.15222e-06	0.397038	2.40808	1.26788
	Tln1	TISSNLTEMSR	OS=Mus musculus GN=Tln1	5.67632e-06	1.36673e-05	0.410724	2.40777	1.2677
	Ncl	SEADAEKNLEEK	OS=Mus musculus GN=Ncl	5.7547e-06	1.3846e-05	0.37545	2.40603	1.26665
	Vps25	FPPFFTLQPNVDTR	OS=Mus musculus GN=Vps25	3.99325e-06	9.60632e-06	0.222006	2.40564	1.26642
	Sf3b1	IYNDDKNTYIR	OS=Mus musculus GN=Sf3b1	2.61617e-06	6.2901e-06	0.138027	2.40432	1.26563
	Gmps	ESQSVEEALKK	OS=Mus musculus GN=Gmps	4.44994e-06	1.06844e-05	0.222656	2.40102	1.26365
	Ctnnb1	HQEAEMAQNAVR	OS=Mus musculus GN=Ctnnb1	1.86105e-06	4.44981e-06	0.423242	2.39102	1.25763
	Smc2	NCEIEELER	OS=Mus musculus GN=Smc2	4.4639e-06	1.06727e-05	0.41225	2.3909	1.25755
	Usp5	TMTELEIDMNQR	OS=Mus musculus GN=Usp5	3.2518e-06	7.76567e-06	0.407541	2.38811	1.25587
	Cdkn2aip	NAGDLVPATDETADAESGAR	OS=Mus musculus GN=Cdkn2aip	1.67886e-06	4.00716e-06	0.392275	2.38683	1.2551
	Srm	QNQDAFDVIITDSSDPMGPAESLFK	OS=Mus musculus GN=Srm	1.51074e-06	3.60369e-06	0.202013	2.38538	1.25422
	Eml2	EVEVPEDFGPVR	OS=Mus musculus GN=Eml2	2.13399e-06	5.09033e-06	0.400595	2.38536	1.25421
	Eef2	YVEPIEDVPCGNIVGLVGVD	OS=Mus musculus GN=Eef2	2.00025e-05	4.76573e-05	0.333534	2.38257	1.25252
	Psmb5	AIYQATYR	OS=Mus musculus GN=Psmb5	6.73699e-06	1.60418e-05	0.465939	2.38116	1.25166
	Lars	SCLFPFGLHCTGMPIK	OS=Mus musculus GN=Lars	4.03354e-06	9.60089e-06	0.145758	2.38026	1.25112
	Ogt	GQLQEAIEHYR	OS=Mus musculus GN=Ogt	4.80352e-06	1.14327e-05	0.0786778	2.38007	1.25101
	Rps25	DKLNNLVLFDK	OS=Mus musculus GN=Rps25	4.31171e-05	0.00010261	0.229332	2.3798	1.25084
	Rpl26	KDDEVQVVR	OS=Mus musculus GN=Rpl26	3.85378e-05	9.16141e-05	0.149121	2.37725	1.24929
	Atic	DLPESALR	OS=Mus musculus GN=Atic	1.17073e-05	2.77429e-05	0.262261	2.36972	1.24471
	Ahnak	VNIEGPDAK	OS=Mus musculus GN=Ahnak	2.428e-06	5.75321e-06	0.139391	2.36952	1.2446
	Atic	IVAPSGSTADK	OS=Mus musculus GN=Atic	1.60232e-05	3.79602e-05	0.398537	2.36908	1.24433
	Mybbp1a	GLPVMPTFWR	OS=Mus musculus GN=Mybbp1a	9.34461e-06	2.2114e-05	0.379116	2.3665	1.24276
	Vim	MFGGSGTSSR	OS=Mus musculus GN=Vim	1.49678e-06	3.54135e-06	0.394413	2.36598	1.24244
	Pgam1	TLWTVLDAIDQ	OS=Mus musculus GN=Pgam1	1.17395e-05	2.77619e-05	0.472209	2.36483	1.24174
	Aimp1	KHPDADSLYVEEVDVGEAAPR	OS=Mus musculus GN=Aimp1	1.37129e-05	3.24192e-05	0.218317	2.36413	1.24131
	Dync1h1	GKEDEGEEAASPMLQIQR	OS=Mus musculus GN=Dync1h1	3.37523e-06	7.96765e-06	0.358003	2.36062	1.23917
	Mybbp1a	ITNQGLPVMPTFWR	OS=Mus musculus GN=Mybbp1a	6.08986e-06	1.43714e-05	0.475793	2.35988	1.23872
	Cdk1	MLVYDPAKR	OS=Mus musculus GN=Cdk1	1.51809e-06	3.57852e-06	0.130032	2.35725	1.2371
	Colgalt1	NSDVLQSPLDSTAR	OS=Mus musculus GN=Colgalt1	5.39454e-06	1.27112e-05	0.0711085	2.35631	1.23653
	Ubl7	DMGIQDDELSLR	OS=Mus musculus GN=Ubl7	1.01566e-06	2.39321e-06	0.195014	2.3563	1.23653
	Dkc1	VAQLDTSQWPLLLK	OS=Mus musculus GN=Dkc1	1.81876e-06	4.27924e-06	0.408989	2.35283	1.2344
	Golga3	VLELEDELQESR	OS=Mus musculus GN=Golga3	3.23784e-06	7.61699e-06	0.455946	2.35249	1.23419
	Myh9	EQLEEEEEAKR	OS=Mus musculus GN=Myh9	1.62829e-05	3.82154e-05	0.146672	2.34697	1.2308
	Ppp2r1a	LTQDQDVDVK	OS=Mus musculus GN=Ppp2r1a	1.17104e-05	2.74558e-05	0.100085	2.34456	1.22932
	Mars	VLTHIDHSLSR	OS=Mus musculus GN=Mars	9.32466e-06	2.18306e-05	0.130019	2.34117	1.22723
	Adk	RTGCTFPEKPDFH	OS=Mus musculus GN=Adk	1.39903e-06	3.27003e-06	0.406589	2.33735	1.22488
	Ddx39	QLLVEQNFPAIAIHR	OS=Mus musculus GN=Ddx39	1.88584e-06	4.40293e-06	0.428459	2.33473	1.22326
	Blmh	MNDILNHK	OS=Mus musculus GN=Blmh	3.60946e-06	8.42708e-06	0.425258	2.33472	1.22325
	Hist1h3e	LVGLFEDTNLCAIHAK	OS=Mus musculus GN=Hist1h3e	5.33402e-05	0.000124402	0.473968	2.33224	1.22172
	Myof	GFPPPVLSEDGSR	OS=Mus musculus GN=Myof	3.2655e-06	7.6034e-06	0.418786	2.3284	1.21934
	Mtap	EVLIETAKK	OS=Mus musculus GN=Mtap	5.33273e-06	1.24127e-05	0.429076	2.32765	1.21887
	Ciapin1	TLSGLVEIK	OS=Mus musculus GN=Ciapin1	5.26194e-06	1.22456e-05	0.429749	2.32719	1.21859
	Abce1	MFDEPSSYLDVK	OS=Mus musculus GN=Abce1	1.07971e-05	2.5096e-05	0.472721	2.32432	1.21681
	Hnrnpu	VSELKEELK	OS=Mus musculus GN=Hnrnpu	7.8481e-06	1.8236e-05	0.406414	2.32362	1.21637
	Vim	RQDVDNASLAR	OS=Mus musculus GN=Vim	9.42135e-06	2.18743e-05	0.152486	2.32178	1.21523
	Eef2	DGTGPNILTDITK	OS=Mus musculus GN=Eef2	2.26518e-06	5.24715e-06	0.41594	2.31645	1.21191
	Gapvd1	SVMSGDQLKEDR	OS=Mus musculus GN=Gapvd1	6.16926e-07	1.4289e-06	0.561848	2.31616	1.21173
	Impdh2	KEANEILQR	OS=Mus musculus GN=Impdh2	2.67826e-06	6.19893e-06	0.419687	2.31453	1.21072
	Ubap2l	NDSTVHSPFTK	OS=Mus musculus GN=Ubap2l	5.61115e-06	1.29796e-05	0.0902113	2.31319	1.20988
	Smc3	NDVMNLLESAGFSR	OS=Mus musculus GN=Smc3	1.17394e-06	2.71333e-06	0.395325	2.31129	1.2087
	Aldh2	VVGNPFDSR	OS=Mus musculus GN=Aldh2	8.76018e-06	2.02126e-05	0.439334	2.30733	1.20622
	Tln1	FLPSELRDEH	OS=Mus musculus GN=Tln1	9.48498e-06	2.18802e-05	0.435028	2.30683	1.20591
	Rpl23a	TLIRPDGEKK	OS=Mus musculus GN=Rpl23a	8.31521e-06	1.91775e-05	0.185191	2.30631	1.20559
	5730455P16Rik	SVVAVLEEFMR	OS=Mus musculus GN=5730455P16Rik	1.47434e-07	3.39905e-07	0.270528	2.30547	1.20506
	Elac2	SQYPEIVFLGTGSAIPMK	OS=Mus musculus GN=Elac2	9.50625e-07	2.1916e-06	0.385403	2.30544	1.20504
	Hnrnpa1	GFGFVTYATVEEVDAAMNAR	OS=Mus musculus GN=Hnrnpa1	6.88583e-06	1.58665e-05	0.440667	2.30422	1.20428
	Psmd5	TLTLSQIGR	OS=Mus musculus GN=Psmd5	1.52365e-06	3.50724e-06	0.410114	2.30186	1.2028
	Ckap5	HINDSAPEVR	OS=Mus musculus GN=Ckap5	2.22818e-06	5.12484e-06	0.419071	2.30001	1.20164
	Cltc	AHIAQLCEK	OS=Mus musculus GN=Cltc	6.1474e-06	1.41161e-05	0.511286	2.29628	1.1993
	Hnrnpd	GEVVDCTLK	OS=Mus musculus GN=Hnrnpd	7.65601e-06	1.75792e-05	0.0203746	2.29613	1.1992
	Tsr1	DGPPHQVLVVPLHSR	OS=Mus musculus GN=Tsr1	4.22547e-06	9.6991e-06	0.438974	2.29539	1.19874
	Ahnak	ANIDVSGPK	OS=Mus musculus GN=Ahnak	6.6143e-06	1.51793e-05	0.10732	2.29491	1.19844
	Cltb	EETPGTEWEK	OS=Mus musculus GN=Cltb	1.46719e-06	3.36542e-06	0.286513	2.29379	1.19773
	Sf3b6	VVYEDIFDAK	OS=Mus musculus GN=Sf3b6	3.46885e-06	7.94739e-06	0.438929	2.29107	1.19602
	Naa15	FAEHGETLAMK	OS=Mus musculus GN=Naa15	7.80608e-06	1.7875e-05	0.0539603	2.28988	1.19527
	Anxa5	ETSGNLEQLLL	OS=Mus musculus GN=Anxa5	1.25668e-05	2.87736e-05	0.486339	2.28966	1.19513
	Slk	SSEVGTDEALDDTQK	OS=Mus musculus GN=Slk	8.44888e-07	1.93438e-06	0.386271	2.28951	1.19504
	Mrto4	GVVTLLSDYEVCK	OS=Mus musculus GN=Mrto4	4.15853e-06	9.52081e-06	0.44987	2.28946	1.19501
	Cald1	ASGDKEAEGAPQVEAGK	OS=Mus musculus GN=Cald1	1.4271e-06	3.26549e-06	0.418499	2.2882	1.19422
	Psmb5	FLHGVIVAA	OS=Mus musculus GN=Psmb5	5.47997e-06	1.25309e-05	0.427964	2.28668	1.19325
	Flnb	VNQPASFAIR	OS=Mus musculus GN=Flnb	4.31983e-06	9.87476e-06	0.431947	2.28592	1.19277
	Cltc	SVEDSLECLR	OS=Mus musculus GN=Cltc	1.2045e-05	2.75221e-05	0.410075	2.28494	1.19215
	Dut	GNVGVVLFNFGK	OS=Mus musculus GN=Dut	2.066e-06	4.71715e-06	0.427134	2.28323	1.19108
	Rabggta	SCLLPQLHPQPDSGPQGR	OS=Mus musculus GN=Rabggta	2.00357e-06	4.5739e-06	0.4226	2.28288	1.19085
	Psat1	SQMIYEIIDNSQGFYVCPVER	OS=Mus musculus GN=Psat1	8.46564e-06	1.93185e-05	0.629576	2.28199	1.19029
	Krt18	LQLETEIEALKEELLFMK	OS=Mus musculus GN=Krt18	1.95429e-06	4.45065e-06	0.422769	2.27738	1.18737
	Arf5	MLQEDELR	OS=Mus musculus GN=Arf5	5.91059e-06	1.34483e-05	0.105649	2.27529	1.18605
	Arfip1	TIEDTLMTVK	OS=Mus musculus GN=Arfip1	4.68727e-06	1.06531e-05	0.437768	2.27277	1.18445
	Vps35	GILEQVVNCR	OS=Mus musculus GN=Vps35	6.5149e-06	1.47938e-05	0.419201	2.27077	1.18318
	Ilf2	INNVIDNLIVAPGTF	OS=Mus musculus GN=Ilf2	5.79924e-06	1.31505e-05	0.327707	2.26762	1.18118
	Wdr4	GLWVLQDCR	OS=Mus musculus GN=Wdr4	1.33447e-06	3.02572e-06	0.420501	2.26737	1.18102
	Dock7	EILEFPAR	OS=Mus musculus GN=Dock7	3.67831e-06	8.33988e-06	0.43537	2.26731	1.18098
	Impdh2	GIQHSCQDIGAK	OS=Mus musculus GN=Impdh2	5.63517e-06	1.27617e-05	0.416996	2.26465	1.17929
	P4hb	NFEEVAFDEKK	OS=Mus musculus GN=P4hb	5.45352e-06	1.23358e-05	0.468261	2.262	1.1776
	Ddx21	TEAVTEIQEK	OS=Mus musculus GN=Ddx21	4.80297e-06	1.08638e-05	0.629371	2.2619	1.17754
	Impdh2	RFGVPVIADGGIQ	OS=Mus musculus GN=Impdh2	9.40821e-06	2.12696e-05	0.415349	2.26075	1.1768
	S100a4	PLEEALDVIVS	OS=Mus musculus GN=S100a4	1.05217e-05	2.37326e-05	0.482734	2.25559	1.17351
	Dync1h1	KLVPLLLEDGGDAPAALEAALEEK	OS=Mus musculus GN=Dync1h1	7.7771e-07	1.75082e-06	0.380696	2.25125	1.17073
	G3bp1	EAGEPGDVEPR	OS=Mus musculus GN=G3bp1	8.61333e-06	1.93688e-05	0.287819	2.2487	1.16909
	Psmd7	ITNQVHGLK	OS=Mus musculus GN=Psmd7	4.64792e-06	1.04382e-05	0.10977	2.24578	1.16722
	Etf1	YVLHCQGTEEEK	OS=Mus musculus GN=Etf1	3.00337e-06	6.74239e-06	0.163887	2.24494	1.16668
	1810009A15Rik	AAMEVEAPSK	OS=Mus musculus GN=1810009A15Rik	3.06659e-06	6.88214e-06	0.445853	2.24423	1.16622
	Pkm	GSGTAEVELKK	OS=Mus musculus GN=Pkm	7.21425e-05	0.000161902	0.20146	2.2442	1.1662
	mKIAA0224	SLNTDVLFGLLR	OS=Mus musculus GN=mKIAA0224	5.46821e-07	1.22716e-06	0.236479	2.24417	1.16618
	Hsp90aa1	SLEDPQTHANR	OS=Mus musculus GN=Hsp90aa1	1.8362e-05	4.12047e-05	0.262851	2.24402	1.16608
	Fkbp1a	YTGMLEDGKK	OS=Mus musculus GN=Fkbp1a	1.04335e-05	2.34048e-05	0.161523	2.24323	1.16558
	Anxa5	DPDTAIDDAQVELDAQALFQAGELK	OS=Mus musculus GN=Anxa5	8.60699e-06	1.92995e-05	0.130564	2.2423	1.16498
	Sec24b	TYINPFVSFIDQR	OS=Mus musculus GN=Sec24b	3.46684e-06	7.76887e-06	0.295905	2.24091	1.16408
	Rnpep	VYTQGQAVLNR	OS=Mus musculus GN=Rnpep	2.06059e-06	4.61225e-06	0.428266	2.23832	1.16241
	Hat1	TNDFLSLLEK	OS=Mus musculus GN=Hat1	1.68129e-06	3.76274e-06	0.446462	2.23801	1.16222
	Psmc3	ETLPTEYDSR	OS=Mus musculus GN=Psmc3	2.18498e-05	4.88681e-05	0.120965	2.23654	1.16127
	Mdh2	GCDVVVIPAGVPR	OS=Mus musculus GN=Mdh2	5.1929e-05	0.0001161	0.455636	2.23574	1.16075
	Aldoa	ELSDIAHR	OS=Mus musculus GN=Aldoa	9.15217e-05	0.000204605	0.159909	2.23559	1.16066
	Kpna4	NVTWVMVNLCR	OS=Mus musculus GN=Kpna4	2.2645e-06	5.05355e-06	0.433941	2.23164	1.1581
	Pebp1	AGVTVDELGK	OS=Mus musculus GN=Pebp1	4.25574e-06	9.4894e-06	0.454077	2.22979	1.15691
	Srsf1	DAEDAVYGR	OS=Mus musculus GN=Srsf1	6.16895e-06	1.37443e-05	0.274649	2.22799	1.15574
	No66	GQHLDAARYVDGRR	OS=Mus musculus GN=No66	1.36828e-05	3.04612e-05	0.639068	2.22625	1.15461
	Polr2a	TVITPDPNLSIDQVGVPR	OS=Mus musculus GN=Polr2a	3.31487e-06	7.3726e-06	0.33767	2.2241	1.15322
	Dync1h1	VTDFGDKVEDPTFLNQLQSGVNR	OS=Mus musculus GN=Dync1h1	6.35411e-06	1.41292e-05	0.460888	2.22364	1.15292
	Diap1	FVAEDLSQDCFWTK	OS=Mus musculus GN=Diap1	9.73024e-07	2.16221e-06	0.280543	2.22215	1.15196
	Ybx1	EDGNEEDKENQGDETQGQQPPQR	OS=Mus musculus GN=Ybx1	1.67847e-05	3.729e-05	0.427931	2.22166	1.15164
	Mcm5	RLPDGLTR	OS=Mus musculus GN=Mcm5	6.00525e-06	1.33363e-05	0.078434	2.22078	1.15107
	Wdr1	FTIGDHSR	OS=Mus musculus GN=Wdr1	2.00567e-05	4.45093e-05	0.184304	2.21918	1.15003
	Pdcd6ip	LQHAAELIK	OS=Mus musculus GN=Pdcd6ip	1.09338e-06	2.42287e-06	0.41518	2.21596	1.14793
	Psma5	GVNTFSPEGR	OS=Mus musculus GN=Psma5	2.83172e-05	6.27478e-05	0.136805	2.21589	1.14789
	Myh9	HEMPPHIYAITDTAYR	OS=Mus musculus GN=Myh9	1.47486e-06	3.26735e-06	0.431264	2.21536	1.14754
	Psme1	DVTEQLNLVTTWLQLQIPR	OS=Mus musculus GN=Psme1	1.11833e-06	2.47726e-06	0.273707	2.21514	1.1474
	Vps35	AFSLYEDEISDSK	OS=Mus musculus GN=Vps35	2.1899e-06	4.85062e-06	0.475182	2.215	1.1473
	Eif1a	TSDIILIGLR	OS=Mus musculus GN=Eif1a	2.59204e-06	5.7321e-06	0.429059	2.21143	1.14498
	Usp10	EAVEDAEFMDVLPPVMPR	OS=Mus musculus GN=Usp10	4.74226e-06	1.04812e-05	0.455223	2.21017	1.14416
	Ipo5	KQAEETYENIPGR	OS=Mus musculus GN=Ipo5	9.9285e-06	2.19309e-05	0.0533391	2.20888	1.14332
	Ldha	LKEEQAPQNK	OS=Mus musculus GN=Ldha	3.31592e-06	7.32188e-06	0.474966	2.2081	1.1428
	Exosc5	NTCEAVVLGALHPR	OS=Mus musculus GN=Exosc5	1.94133e-06	4.28492e-06	0.440934	2.20721	1.14222
	Cct5	MIIEEAKR	OS=Mus musculus GN=Cct5	1.64183e-05	3.62091e-05	0.144335	2.2054	1.14104
	Ahnak	GDLGASSPSMK	OS=Mus musculus GN=Ahnak	1.75357e-05	3.86667e-05	0.1225	2.20503	1.1408
	Vcp	RDHFEEAMR	OS=Mus musculus GN=Vcp	7.24712e-06	1.59713e-05	0.115013	2.20381	1.14
	Camk2d	DLVTGGELFEDIVAR	OS=Mus musculus GN=Camk2d	6.08311e-06	1.339e-05	0.469855	2.20118	1.13828
	Mapk3	MLTFNPNKR	OS=Mus musculus GN=Mapk3	1.33386e-06	2.933e-06	0.429796	2.19888	1.13677
	Eif3g	GFAFISFHR	OS=Mus musculus GN=Eif3g	4.21152e-07	9.2554e-07	0.531575	2.19764	1.13596
	Cct3	IDDIVSGHK	OS=Mus musculus GN=Cct3	1.4392e-05	3.16271e-05	0.242061	2.19754	1.13589
	Flna	ETGEHLVHVK	OS=Mus musculus GN=Flna	3.11539e-05	6.83234e-05	0.132888	2.1931	1.13297
	Iars	MQSVIELGR	OS=Mus musculus GN=Iars	1.37178e-06	3.00813e-06	0.619281	2.19286	1.13281
	Gm5409	TLDNDIMLIKLSSPVTL	OS=Mus musculus GN=Gm5409	8.71178e-06	1.90957e-05	0.620219	2.19194	1.13221
	Ywhag	EHMQPTHPIR	OS=Mus musculus GN=Ywhag	8.01899e-05	0.000175767	0.0303494	2.19188	1.13217
	Cops6	IGVDHVAR	OS=Mus musculus GN=Cops6	4.25736e-06	9.32703e-06	0.183086	2.1908	1.13146
	Hnrnpa1	GIKEDTEEHHLR	OS=Mus musculus GN=Hnrnpa1	8.04593e-06	1.7607e-05	0.333436	2.18831	1.12982
	Rpl12	QAQIEVVPSASAL	OS=Mus musculus GN=Rpl12	1.15106e-05	2.51698e-05	0.231684	2.18666	1.12873
	Mat2b	IPVLYGEVEK	OS=Mus musculus GN=Mat2b	1.70798e-06	3.73472e-06	0.23665	2.18663	1.12871
	Rac1	HHCPNTPIILVGTK	OS=Mus musculus GN=Rac1	3.89897e-05	8.51503e-05	0.0470465	2.18392	1.12692
	Usp14	LEAIEDDSGRET	OS=Mus musculus GN=Usp14	1.91021e-06	4.16994e-06	0.443639	2.18298	1.1263
	Hmga1	KQPPVSPGTALVG	OS=Mus musculus GN=Hmga1	7.45621e-06	1.62744e-05	0.143903	2.18266	1.12609
	Fam129b	ARPAMEAVIR	OS=Mus musculus GN=Fam129b	6.80946e-06	1.48606e-05	0.462496	2.18235	1.12588
	Tmpo	YGVNPGPIVGTTR	OS=Mus musculus GN=Tmpo	1.45572e-05	3.17489e-05	0.46664	2.18098	1.12498
	Dync1h1	AHQANQLYPF	OS=Mus musculus GN=Dync1h1	9.16989e-06	1.99984e-05	0.210114	2.18088	1.12491
	Itga3	LQSFFGGTVMGEAAMK	OS=Mus musculus GN=Itga3	2.06125e-06	4.48995e-06	0.448045	2.17827	1.12318
	Mocs3	RVPPPPLAPR	OS=Mus musculus GN=Mocs3	1.13015e-05	2.45948e-05	0.466767	2.17624	1.12184
	Hnrnpl	MGPPVGGHR	OS=Mus musculus GN=Hnrnpl	9.04494e-06	1.96763e-05	0.178034	2.17539	1.12127
	Ahnak	VKGEYDVTMPK	OS=Mus musculus GN=Ahnak	2.64049e-05	5.73769e-05	0.469938	2.17296	1.11966
	Cad	NKSELLPTVR	OS=Mus musculus GN=Cad	1.7781e-06	3.86345e-06	0.444454	2.1728	1.11955
	Psmc2	LREVVETPLLHPER	OS=Mus musculus GN=Psmc2	2.49036e-06	5.40813e-06	0.103502	2.17163	1.11878
	Flna	HTAMVSWGGVSIPNSPFR	OS=Mus musculus GN=Flna	1.68965e-06	3.66749e-06	0.498355	2.17057	1.11807
	Hdgf	EGERPLPVEVEK	OS=Mus musculus GN=Hdgf	1.93322e-05	4.19516e-05	0.190869	2.17003	1.11772
	Ipo5	KICDIAAELAR	OS=Mus musculus GN=Ipo5	4.11486e-06	8.9264e-06	0.459832	2.16931	1.11724
	Tktl2	VIGQAKVIR	OS=Mus musculus GN=Tktl2	5.168e-06	1.11976e-05	0.469076	2.16673	1.11552
	Hspa4	HFCEEFGK	OS=Mus musculus GN=Hspa4	1.23426e-05	2.67359e-05	0.469392	2.16614	1.11513
	Cops4	CQQLAAYGILEK	OS=Mus musculus GN=Cops4	5.62486e-07	1.21839e-06	0.573015	2.16608	1.11509
	Atp6v1b2	GPVVLAEDFLDIMGQPINPQCR	OS=Mus musculus GN=Atp6v1b2	2.7826e-06	6.02355e-06	0.476115	2.16472	1.11418
	Slc25a5	AAYFGIYDTAK	OS=Mus musculus GN=Slc25a5	1.41677e-05	3.05848e-05	0.471647	2.15877	1.11021
	Eef2	DIKLDSEDKDK	OS=Mus musculus GN=Eef2	6.1125e-06	1.31942e-05	0.240576	2.15857	1.11007
	Lars	ELMGEEILGA	OS=Mus musculus GN=Lars	3.4173e-06	7.37285e-06	0.476026	2.15751	1.10937
	Gart	VLVIGSGGR	OS=Mus musculus GN=Gart	4.98185e-07	1.07457e-06	0.36188	2.15697	1.10901
	Hist1h2bj	KQVHPDTGISSK	OS=Mus musculus GN=Hist1h2bj	8.10696e-05	0.000174827	0.090569	2.1565	1.10869
	Lars	RFDDPLLGPR	OS=Mus musculus GN=Lars	2.52664e-05	5.44407e-05	0.198385	2.15467	1.10746
	Calm1	MKDTDSEEEIR	OS=Mus musculus GN=Calm1	4.71164e-05	0.000101464	0.212324	2.15348	1.10667
	Hspa4	DVVPYPISLR	OS=Mus musculus GN=Hspa4	8.71629e-06	1.87696e-05	0.267981	2.1534	1.10661
	Prss2	TLDNDIMLIK	OS=Mus musculus GN=Prss2	3.42644e-05	7.37846e-05	0.469682	2.15339	1.10661
	Cnot1	SLLEVVVLSR	OS=Mus musculus GN=Cnot1	1.87737e-06	4.04117e-06	0.44943	2.15257	1.10606
	Rab5a	GVDLTEPAQPAR	OS=Mus musculus GN=Rab5a	2.01899e-05	4.34383e-05	0.445635	2.15148	1.10533
	Eef1a1	TIIDAPGHR	OS=Mus musculus GN=Eef1a1	2.00567e-06	4.31191e-06	0.451593	2.14986	1.10424
	Psmc3	MLELLNQLDGFQPNTQVK	OS=Mus musculus GN=Psmc3	6.24162e-06	1.34029e-05	0.312438	2.14734	1.10255
	Cat	NFTDVHPDYGAR	OS=Mus musculus GN=Cat	4.53588e-06	9.73632e-06	0.468086	2.14651	1.10199
	Tpt1	HHLQETSFTK	OS=Mus musculus GN=Tpt1	3.27934e-05	7.03227e-05	0.236929	2.14441	1.10058
	Nle1	YLASGSGDTTVR	OS=Mus musculus GN=Nle1	3.22065e-06	6.90401e-06	0.101407	2.14367	1.10008
	Rcn2	EALLGVQEDVDEYVK	OS=Mus musculus GN=Rcn2	2.36131e-06	5.05807e-06	0.468586	2.14205	1.099
	Psmd7	VVVHPLVLL	OS=Mus musculus GN=Psmd7	4.64463e-06	9.94316e-06	0.437164	2.14078	1.09814
	Uggt1	AIWAALQTQASSSAK	OS=Mus musculus GN=Uggt1	1.32197e-06	2.82918e-06	0.439371	2.14012	1.09769
	Vps26a	SNTHEFVNLVK	OS=Mus musculus GN=Vps26a	4.74818e-06	1.01596e-05	0.469732	2.13968	1.09739
	Rps8	ADGYVLEGK	OS=Mus musculus GN=Rps8	7.38572e-06	1.58018e-05	0.0273146	2.1395	1.09728
	Rab31	NAINIEELFQGISR	OS=Mus musculus GN=Rab31	3.62317e-06	7.74182e-06	0.473643	2.13675	1.09542
	Rps8	QWYESHYALPLGR	OS=Mus musculus GN=Rps8	9.52117e-06	2.0331e-05	0.483007	2.13535	1.09447
	Aldoa	KELSDIAHR	OS=Mus musculus GN=Aldoa	1.64692e-05	3.51198e-05	0.277755	2.13245	1.09251
	Cct3	EIQVQHPAAK	OS=Mus musculus GN=Cct3	4.64274e-05	9.88644e-05	0.163178	2.12944	1.09047
	Sfn	SAYQEAMDISK	OS=Mus musculus GN=Sfn	3.19942e-05	6.80175e-05	0.152749	2.12593	1.08809
	Cct2	ILIANTGMDTDKIK	OS=Mus musculus GN=Cct2	6.97129e-07	1.48073e-06	0.601286	2.12405	1.08682
	Cdh1	KDLEIGEYK	OS=Mus musculus GN=Cdh1	4.2859e-06	9.10236e-06	0.155777	2.12379	1.08664
	Sf3a1	IHEATGMPAGK	OS=Mus musculus GN=Sf3a1	4.95734e-06	1.05221e-05	0.181146	2.12253	1.08578
	Rps4x	MVTGGANLGR	OS=Mus musculus GN=Rps4x	4.1974e-05	8.90455e-05	0.170048	2.12145	1.08505
	Rcc2	AIITEPEHTK	OS=Mus musculus GN=Rcc2	1.41323e-05	2.99753e-05	0.181637	2.12106	1.08478
	Cul4b	EAVEAIQNSTSIK	OS=Mus musculus GN=Cul4b	2.61526e-06	5.54334e-06	0.358631	2.11961	1.0838
	Ssb	LTTDFNVIVQ	OS=Mus musculus GN=Ssb	4.22169e-06	8.94404e-06	0.19295	2.11859	1.08311
	Asns	AMTEDGFLAVCSEAK	OS=Mus musculus GN=Asns	6.27908e-06	1.32838e-05	0.482786	2.11556	1.08104
	Snx6	NLVELAELELK	OS=Mus musculus GN=Snx6	6.75897e-06	1.42867e-05	0.484538	2.11374	1.0798
	Capn1	DMETIGFAVYQVPR	OS=Mus musculus GN=Capn1	1.58942e-06	3.35907e-06	0.471578	2.11339	1.07956
	Hdlbp	VHIEFTEGEDK	OS=Mus musculus GN=Hdlbp	1.65106e-06	3.48823e-06	0.463569	2.11272	1.0791
	Atic	MDQSYKPDENEVR	OS=Mus musculus GN=Atic	9.04321e-06	1.91047e-05	0.488281	2.1126	1.07902
	Eif3a	NMDDDRVPR	OS=Mus musculus GN=Eif3a	5.24076e-06	1.10668e-05	0.386476	2.11168	1.07839
	Cs	ALNSESNFAR	OS=Mus musculus GN=Cs	1.27098e-05	2.68223e-05	0.0907949	2.11036	1.07749
	Ahnak	AEAPLPSPK	OS=Mus musculus GN=Ahnak	7.74715e-06	1.63488e-05	0.171155	2.1103	1.07745
	Lars	EMLASCSSLR	OS=Mus musculus GN=Lars	4.65593e-06	9.80939e-06	0.117607	2.10686	1.07509
	Tcp1	DCLINAAK	OS=Mus musculus GN=Tcp1	9.45801e-06	1.99156e-05	0.0994822	2.10569	1.07429
	Tcerg1	EALFNEFVAAAR	OS=Mus musculus GN=Tcerg1	1.06747e-06	2.24743e-06	0.442308	2.10538	1.07408
	Ythdf1	SYSEDDIHR	OS=Mus musculus GN=Ythdf1	2.14522e-06	4.5154e-06	0.642169	2.10487	1.07373
	Hsp90b1	KSGTSEFLNK	OS=Mus musculus GN=Hsp90b1	1.10482e-05	2.32311e-05	0.19233	2.10272	1.07225
	Hsp90ab1	KHLEINPDHPIVETLR	OS=Mus musculus GN=Hsp90ab1	1.55169e-05	3.25529e-05	0.439317	2.0979	1.06895
	Mcm4	TGIVDISILTTGMSATSR	OS=Mus musculus GN=Mcm4	2.65894e-06	5.57252e-06	0.373043	2.09577	1.06748
	Hist2h4	KTVTAMDVVYALKR	OS=Mus musculus GN=Hist2h4	5.04125e-06	1.05527e-05	0.488034	2.09327	1.06576
	Wdr1	DIAWTEDSKR	OS=Mus musculus GN=Wdr1	6.94107e-06	1.45291e-05	0.109436	2.0932	1.06571
	Psmd1	VLSMTETCR	OS=Mus musculus GN=Psmd1	2.93687e-06	6.14419e-06	0.177188	2.09209	1.06494
	Tpm1	EDKYEEEIK	OS=Mus musculus GN=Tpm1	1.50235e-05	3.13903e-05	0.652978	2.08942	1.0631
	Arpc2	DDETMYVESK	OS=Mus musculus GN=Arpc2	4.68125e-06	9.77305e-06	0.114965	2.0877	1.06191
	Sart3	EFESAIVEAAR	OS=Mus musculus GN=Sart3	6.54118e-06	1.3654e-05	0.486959	2.08739	1.0617
	Actn1	KHEAFESDLAAHQDR	OS=Mus musculus GN=Actn1	5.8423e-06	1.21852e-05	0.181357	2.08569	1.06053
	G3bp1	NQAPDMLHR	OS=Mus musculus GN=G3bp1	1.08528e-05	2.26293e-05	0.159782	2.08512	1.06013
	Lypla2	GLSPDAPEDEAGIK	OS=Mus musculus GN=Lypla2	6.8435e-06	1.42607e-05	0.126997	2.08383	1.05924
	Kif5b	AAEMMASLLK	OS=Mus musculus GN=Kif5b	3.93945e-07	8.20698e-07	0.335954	2.08328	1.05886
	Hyou1	DLPDLPEDELAR	OS=Mus musculus GN=Hyou1	1.03741e-05	2.16078e-05	0.145265	2.08287	1.05857
	Acly	LYRPGSVAYVSR	OS=Mus musculus GN=Acly	3.42608e-06	7.13587e-06	0.528893	2.08281	1.05853
	Lgals3	GNDVAFHFNPR	OS=Mus musculus GN=Lgals3	5.27035e-05	0.000109656	0.179212	2.08062	1.05702
	Nedd4	TGGSEIVVTNK	OS=Mus musculus GN=Nedd4	1.88482e-06	3.91878e-06	0.467729	2.07913	1.05598
	Stip1	EGLQNMEAR	OS=Mus musculus GN=Stip1	8.70797e-06	1.80936e-05	0.660262	2.07783	1.05508
	Pabpc1	FQQPADAER	OS=Mus musculus GN=Pabpc1	2.03312e-05	4.22408e-05	0.15133	2.07763	1.05494
	Ncapg	LMFSGLLVSSR	OS=Mus musculus GN=Ncapg	3.01981e-06	6.26877e-06	0.481801	2.07588	1.05372
	Vim	EVDALKGTNESLER	OS=Mus musculus GN=Vim	3.06815e-06	6.36385e-06	0.405397	2.07417	1.05253
	Hnrnpd	MFIGGLSWDTTKK	OS=Mus musculus GN=Hnrnpd	1.8187e-06	3.77187e-06	0.494137	2.07394	1.05237
	Dpysl2	DHGVNSFLVY	OS=Mus musculus GN=Dpysl2	1.34503e-06	2.7894e-06	0.347174	2.07385	1.05231
	Serbp1	FEKPLEEK	OS=Mus musculus GN=Serbp1	5.10405e-06	1.05848e-05	0.140486	2.0738	1.05228
	Nap1l1	LDGLVDTPTGYIE	OS=Mus musculus GN=Nap1l1	1.21351e-05	2.5149e-05	0.496813	2.07242	1.05131
	Plec	IVITVVEEHER	OS=Mus musculus GN=Plec	5.03502e-06	1.04331e-05	0.487719	2.07211	1.0511
	Ugp2	SFENSLGINVPR	OS=Mus musculus GN=Ugp2	4.49309e-06	9.3094e-06	0.486223	2.07194	1.05098
	Cct7	GRVPEEDLKR	OS=Mus musculus GN=Cct7	1.26587e-05	2.62144e-05	0.366857	2.07086	1.05023
	Clic1	NSNPALNDNLEK	OS=Mus musculus GN=Clic1	9.06805e-05	0.000187738	0.130269	2.07032	1.04985
	Ctps1	IYQYVINK	OS=Mus musculus GN=Ctps1	5.69808e-06	1.17821e-05	0.0989502	2.06774	1.04805
	Ap1g1	NVGNAILYETVLTIM	OS=Mus musculus GN=Ap1g1	2.91938e-06	6.03434e-06	0.472758	2.06699	1.04753
	Fdps	TAPQGHVDLGR	OS=Mus musculus GN=Fdps	2.46614e-05	5.09694e-05	0.311881	2.06677	1.04737
	Pabpc1	FSSPEEATK	OS=Mus musculus GN=Pabpc1	1.17509e-05	2.4279e-05	0.21425	2.06614	1.04694
	Dis3	ASLTYAEAQMR	OS=Mus musculus GN=Dis3	5.12733e-06	1.0588e-05	0.489116	2.06502	1.04615
	Cacybp	LRDTLTSEK	OS=Mus musculus GN=Cacybp	1.63908e-05	3.38363e-05	0.195103	2.06435	1.04569
	Eprs	SDHFETIMK	OS=Mus musculus GN=Eprs	9.02463e-06	1.85989e-05	0.151604	2.0609	1.04328
	2700060E02Rik	NFIVWLEDQK	OS=Mus musculus GN=2700060E02Rik	4.92076e-06	1.01406e-05	0.490548	2.06078	1.04319
	Ap2b1	LLSTDPVTAK	OS=Mus musculus GN=Ap2b1	1.46051e-06	3.0096e-06	0.472731	2.06066	1.0431
	Hdlbp	DMNQFGEGEQAK	OS=Mus musculus GN=Hdlbp	1.25833e-06	2.59221e-06	0.458499	2.06004	1.04267
	Myh10	LCHLLGMNVMEFTR	OS=Mus musculus GN=Myh10	5.61078e-06	1.15513e-05	0.584267	2.05878	1.04179
	Ctps1	CSNPLDTSVK	OS=Mus musculus GN=Ctps1	2.67951e-06	5.51511e-06	0.482157	2.05826	1.04142
	Prmt5	EKDRDPEAQFEMPYVVR	OS=Mus musculus GN=Prmt5	2.03525e-06	4.18873e-06	0.0944919	2.05809	1.04131
	Pls3	RYTLNVLEDLGEGQK	OS=Mus musculus GN=Pls3	9.66159e-07	1.98832e-06	0.455389	2.05796	1.04121
	Atp5b	GMDELSEEDKLTVSR	OS=Mus musculus GN=Atp5b	8.06359e-06	1.65781e-05	0.496894	2.05592	1.03978
	Vim	QQYESVAAK	OS=Mus musculus GN=Vim	1.40839e-06	2.89428e-06	0.524299	2.05503	1.03916
	Luc7l	AEQLGAEGNVDESQK	OS=Mus musculus GN=Luc7l	1.41936e-06	2.91575e-06	0.465495	2.05426	1.03862
	Tln1	ALGDLISATK	OS=Mus musculus GN=Tln1	1.35138e-06	2.77476e-06	0.469051	2.05328	1.03793
	Psmb5	AGGAADCSFWER	OS=Mus musculus GN=Psmb5	4.78678e-06	9.81251e-06	0.488527	2.04992	1.03557
	Psap	VEVMDPGFVCSK	OS=Mus musculus GN=Psap	1.42899e-05	2.92929e-05	0.53306	2.0499	1.03555
	Cct3	MTNDGNAILR	OS=Mus musculus GN=Cct3	4.82311e-06	9.8868e-06	0.195844	2.04988	1.03554
	Ahnak	VKGDVDVSLPK	OS=Mus musculus GN=Ahnak	0.000467796	0.000958658	0.102052	2.04931	1.03514
	Rpl26	HFNAPSHIR	OS=Mus musculus GN=Rpl26	0.000157556	0.000322851	0.0947022	2.04912	1.035
	Flnc	ITEGDLSQLTASIR	OS=Mus musculus GN=Flnc	9.77871e-07	2.00362e-06	0.627849	2.04896	1.03489
	Cse1l	ALQEIFDGIQPK	OS=Mus musculus GN=Cse1l	7.31615e-06	1.49884e-05	0.470731	2.04867	1.03469
	Psma1	IYDDDDVSPFLDGLEERPQR	OS=Mus musculus GN=Psma1	2.39443e-06	4.9054e-06	0.434269	2.04867	1.03469
	Rps4x	YALTGDEVK	OS=Mus musculus GN=Rps4x	6.28262e-05	0.000128695	0.170202	2.04842	1.03451
	Dhx9	PSAAGINLMIGSVR	OS=Mus musculus GN=Dhx9	3.11282e-06	6.37307e-06	0.551286	2.04736	1.03377
	Snrnp200	AALETDENLLLCAPTGAGK	OS=Mus musculus GN=Snrnp200	2.54202e-06	5.20306e-06	0.333237	2.04682	1.03338
	Npepps	HGDGATLDIMLK	OS=Mus musculus GN=Npepps	7.44943e-06	1.52468e-05	0.518407	2.0467	1.0333
	Npm3	CLTEGATDECNVVEVVAR	OS=Mus musculus GN=Npm3	1.96338e-06	4.01672e-06	0.492497	2.04582	1.03268
	Eef2	VGVDQFLVK	OS=Mus musculus GN=Eef2	5.01964e-05	0.000102601	0.278425	2.04399	1.03139
	Eif4a2	LDTLCDLYETL	OS=Mus musculus GN=Eif4a2	2.60249e-05	5.31528e-05	0.461202	2.04238	1.03025
	Fasn	GILLDALFEEANDSWR	OS=Mus musculus GN=Fasn	8.50462e-06	1.73667e-05	0.333093	2.04203	1.03001
	Ddx5	FYEANFPANVMDVIAR	OS=Mus musculus GN=Ddx5	2.70137e-06	5.51149e-06	0.48775	2.04026	1.02875
	Myh9	VAAYDKLEK	OS=Mus musculus GN=Myh9	6.44177e-06	1.31388e-05	0.157993	2.03963	1.02831
	Rrp12	VLDPASSDFTR	OS=Mus musculus GN=Rrp12	5.96001e-06	1.21547e-05	0.50068	2.03937	1.02812
	Gpi	EWFLEAAKDPSAVAK	OS=Mus musculus GN=Gpi	2.43401e-06	4.96167e-06	0.51339	2.03847	1.02749
	Uggt1	ILETTTFFQR	OS=Mus musculus GN=Uggt1	3.98862e-06	8.13047e-06	0.494518	2.03842	1.02745
	Ythdf1	DTQEVPLEK	OS=Mus musculus GN=Ythdf1	1.25669e-05	2.55973e-05	0.158255	2.03688	1.02636
	Kpnb1	IQFNDLQSLLCATLQ	OS=Mus musculus GN=Kpnb1	7.07477e-06	1.43918e-05	0.514762	2.03424	1.02449
	Srsf1	SHEGETAYIR	OS=Mus musculus GN=Srsf1	3.48641e-06	7.09125e-06	0.500076	2.03397	1.0243
	Pfdn2	GKELNEFR	OS=Mus musculus GN=Pfdn2	4.25702e-06	8.65755e-06	0.149919	2.03371	1.02411
	Cebpz	ELLITDLLPDSR	OS=Mus musculus GN=Cebpz	2.34407e-06	4.76635e-06	0.446066	2.03336	1.02387
	Wars	AIDQDPYFR	OS=Mus musculus GN=Wars	1.56494e-05	3.18015e-05	0.505913	2.03213	1.02299
	Hsp90ab1	YIDQEELNK	OS=Mus musculus GN=Hsp90ab1	0.000471559	0.000957468	0.154698	2.03043	1.02179
	Tfrc	VSASPLLYTLMGK	OS=Mus musculus GN=Tfrc	1.40632e-05	2.85401e-05	0.50769	2.02942	1.02107
	Trip12	LPDYSSIDIMR	OS=Mus musculus GN=Trip12	1.48671e-06	3.01662e-06	0.341696	2.02906	1.02081
	Eef1a1	DSTEPPYSQK	OS=Mus musculus GN=Eef1a1	4.31257e-05	8.74916e-05	0.279359	2.02876	1.0206
	Thumpd3	NWNLYPACLR	OS=Mus musculus GN=Thumpd3	1.42807e-06	2.89331e-06	0.647823	2.02603	1.01866
	Wars	DYTSGAMLTGELKK	OS=Mus musculus GN=Wars	2.68647e-06	5.44135e-06	0.605949	2.02546	1.01825
	Lmna	KLLEGEEER	OS=Mus musculus GN=Lmna	2.92894e-06	5.93016e-06	0.217525	2.02468	1.01769
	Txn	EAFQEALAAA	OS=Mus musculus GN=Txn	1.60925e-05	3.25712e-05	0.377167	2.024	1.01721
	Vasp	LPAQSEPVR	OS=Mus musculus GN=Vasp	8.16217e-06	1.65198e-05	0.116345	2.02395	1.01717
	Hnrnpab	GLNPEATEEK	OS=Mus musculus GN=Hnrnpab	4.07131e-06	8.23967e-06	0.277306	2.02383	1.01709
	Rpl5	EFNAEVHR	OS=Mus musculus GN=Rpl5	1.21779e-05	2.45848e-05	0.156646	2.0188	1.0135
	Trim23	DALLLIFANK	OS=Mus musculus GN=Trim23	1.13347e-06	2.2882e-06	0.638804	2.01876	1.01347
	Snrnp200	LIVLDEIHLL	OS=Mus musculus GN=Snrnp200	4.15442e-06	8.38518e-06	0.449181	2.01838	1.01319
	Exosc2	LDSVLLLSSMNLPGGELR	OS=Mus musculus GN=Exosc2	1.55071e-06	3.12915e-06	0.479861	2.01787	1.01284
	ppp2r5d	DVVTEAIYPEAVTMFSVNLFR	OS=Mus musculus GN=ppp2r5d	1.28361e-06	2.58765e-06	0.643135	2.01591	1.01143
	Ahcyl2	GIVEESVTGVHR	OS=Mus musculus GN=Ahcyl2	7.49994e-06	1.51159e-05	0.513534	2.01547	1.01112
	Glud1	NYTDNELEK	OS=Mus musculus GN=Glud1	5.47815e-06	1.1041e-05	0.260919	2.01546	1.01111
	Igf2bp2	LKEENFFNPK	OS=Mus musculus GN=Igf2bp2	2.84685e-06	5.73364e-06	0.663058	2.01403	1.01008
	Tpd52l2	TPVVEGLTEGEEEELRAELAK	OS=Mus musculus GN=Tpd52l2	3.33519e-06	6.71607e-06	0.506907	2.0137	1.00985
	Mob1b	HAEATLGSGNLR	OS=Mus musculus GN=Mob1b	1.86632e-06	3.75726e-06	0.401655	2.01319	1.00948
	Snrpb	RVLGLVLLR	OS=Mus musculus GN=Snrpb	1.62412e-05	3.26938e-05	0.343302	2.01302	1.00936
	Psmc1	KYEPPVPTR	OS=Mus musculus GN=Psmc1	1.68644e-05	3.39414e-05	0.151338	2.0126	1.00906
	Syncrip	AIEALKEFNEDGALAVLQ	OS=Mus musculus GN=Syncrip	7.60434e-06	1.53034e-05	0.416803	2.01246	1.00896
	Mt2	SCCSCCPVGCAK	OS=Mus musculus GN=Mt2	2.14049e-05	4.30622e-05	0.274838	2.01179	1.00848
	Vars	PSVSAPNPR	OS=Mus musculus GN=Vars	8.17439e-06	1.6431e-05	0.429574	2.01006	1.00724
	Arpc2	DYLHYHIK	OS=Mus musculus GN=Arpc2	9.65395e-06	1.94005e-05	0.513766	2.00959	1.0069
	Rpl6	KPFSQHVR	OS=Mus musculus GN=Rpl6	1.90271e-05	3.82334e-05	0.0822399	2.00942	1.00678
	Serbp1	SEEAHAEDSVMDHHFR	OS=Mus musculus GN=Serbp1	1.15186e-06	2.31452e-06	0.471932	2.00938	1.00675
	Eif4g2	FFLEGPFMPPR	OS=Mus musculus GN=Eif4g2	1.2366e-06	2.48336e-06	0.473974	2.00821	1.00591
	Psmc2	IINADSEDPK	OS=Mus musculus GN=Psmc2	4.15378e-06	8.33558e-06	0.272355	2.00675	1.00486
	Impdh2	VRDVFEAK	OS=Mus musculus GN=Impdh2	1.10972e-05	2.2262e-05	0.45078	2.00609	1.00438
	Ganab	SGGIERPFVLSR	OS=Mus musculus GN=Ganab	1.0561e-05	2.11781e-05	0.464144	2.00531	1.00383
	Prkcsh	LLELQAGK	OS=Mus musculus GN=Prkcsh	4.07432e-06	8.16339e-06	0.177229	2.00362	1.00261
	Cnpy2	SEAHLTELLEEVCDR	OS=Mus musculus GN=Cnpy2	3.21751e-06	6.44456e-06	0.340133	2.00297	1.00214
	Mcm5	TTQEDQEMLSR	OS=Mus musculus GN=Mcm5	3.07897e-06	6.16408e-06	0.414097	2.00199	1.00144
	Rars	IIYVVDNGQAIHFQ	OS=Mus musculus GN=Rars	5.78821e-06	1.158e-05	0.48017	2.00063	1.00045
	Ptbp1	AGQSPVLR	OS=Mus musculus GN=Ptbp1	6.28362e-06	1.25644e-05	0.177104	1.99954	0.999671
	Dctn2	LADPDGALAK	OS=Mus musculus GN=Dctn2	8.9234e-06	1.78265e-05	0.130237	1.99773	0.998358
	Tfrc	LAADEEENADNNMK	OS=Mus musculus GN=Tfrc	3.12769e-06	6.24812e-06	0.127433	1.99768	0.998325
	Abcf1	ANDPYANLSK	OS=Mus musculus GN=Abcf1	3.67473e-06	7.33967e-06	0.127023	1.99733	0.998075
	Pdap1	IDIENPNR	OS=Mus musculus GN=Pdap1	1.16366e-05	2.32321e-05	0.215301	1.99646	0.997445
	Sypl	TEIQVNCPK	OS=Mus musculus GN=Sypl	3.34749e-06	6.67878e-06	0.148981	1.99516	0.996505
	Cct7	LDELLQLK	OS=Mus musculus GN=Cct7	1.82001e-05	3.62831e-05	0.336903	1.99357	0.995353
	Ap1b1	NVEGQDMLYQSLK	OS=Mus musculus GN=Ap1b1	6.20191e-06	1.23407e-05	0.51507	1.98983	0.992644
	Sec23b	AGYQDMPEYENFK	OS=Mus musculus GN=Sec23b	6.23856e-06	1.241e-05	0.516902	1.98923	0.992213
	Eef1g	PGSEETQTLVR	OS=Mus musculus GN=Eef1g	1.89298e-05	3.76265e-05	0.0605448	1.98769	0.991093
	Anxa1	RVFQNYGK	OS=Mus musculus GN=Anxa1	3.85269e-05	7.65505e-05	0.242787	1.98694	0.990547
	Ewsr1	NDNVTLDDLADFFK	OS=Mus musculus GN=Ewsr1	4.74515e-06	9.42801e-06	0.294517	1.98687	0.990501
	Ctbp1	DCTVEMPILK	OS=Mus musculus GN=Ctbp1	1.64874e-05	3.27075e-05	0.533023	1.98379	0.988262
	Gcsh	HEWITTEEGIGTVGIS	OS=Mus musculus GN=Gcsh	6.25343e-06	1.23961e-05	0.490443	1.98228	0.987164
	Eif2s2	SPDTILQK	OS=Mus musculus GN=Eif2s2	1.44442e-05	2.86084e-05	0.164688	1.98061	0.985946
	Rpe	TQFPTLDIEVDGGVGPDTVQK	OS=Mus musculus GN=Rpe	5.04457e-06	9.9856e-06	0.518529	1.97947	0.985117
	Cfl1	AVLFCLSEDKK	OS=Mus musculus GN=Cfl1	1.93435e-06	3.82397e-06	0.460952	1.97687	0.983218
	Mydgf	GAEIEYAMAYSK	OS=Mus musculus GN=Mydgf	2.47112e-06	4.88284e-06	0.50998	1.97596	0.982554
	Psmb5	VIEINPYLLGTM	OS=Mus musculus GN=Psmb5	9.54405e-06	1.88475e-05	0.439019	1.97479	0.981698
	Sec23b	SIAVGLLEGTFPNTGAR	OS=Mus musculus GN=Sec23b	3.02053e-06	5.96328e-06	0.272505	1.97425	0.981303
	Myh9	VEDMAELTCLNEASVLHNLK	OS=Mus musculus GN=Myh9	3.0264e-06	5.97043e-06	0.515535	1.97278	0.980231
	Cct7	MMLDELLQLK	OS=Mus musculus GN=Cct7	9.47737e-06	1.86573e-05	0.496598	1.96862	0.977182
	Ptges3	DWEDDSDEDMSNFDR	OS=Mus musculus GN=Ptges3	9.57972e-07	1.8858e-06	0.493103	1.96854	0.977124
	Cad	EITTTPERPR	OS=Mus musculus GN=Cad	7.383e-06	1.45248e-05	0.193177	1.96733	0.976236
	Fasn	QFLDVEHSK	OS=Mus musculus GN=Fasn	8.70259e-06	1.71158e-05	0.195228	1.96675	0.975813
	Fasn	GGLGGFGLELAR	OS=Mus musculus GN=Fasn	1.93778e-05	3.80974e-05	0.549054	1.96603	0.975287
	Snx1	IVNHPTMLQDPDVR	OS=Mus musculus GN=Snx1	1.00152e-06	1.96801e-06	0.503832	1.96501	0.97454
	Iqgap1	LFQTALQEEIK	OS=Mus musculus GN=Iqgap1	2.58983e-05	5.08829e-05	0.531238	1.96471	0.97432
	Rpl35a	DETEFYLGKR	OS=Mus musculus GN=Rpl35a	4.00946e-06	7.87462e-06	0.521771	1.96401	0.973802
	Tln1	EDQENETVVVK	OS=Mus musculus GN=Tln1	1.05991e-05	2.08105e-05	0.185654	1.96341	0.97336
	Ptma	VAEDDEDDDVDTK	OS=Mus musculus GN=Ptma	2.2869e-05	4.48969e-05	0.226357	1.96322	0.973223
	Thumpd1	ELAGIVGSLNSENK	OS=Mus musculus GN=Thumpd1	4.13749e-06	8.12056e-06	0.422424	1.96268	0.972822
	Lrrc40	FLALEGNPLR	OS=Mus musculus GN=Lrrc40	1.57875e-06	3.09645e-06	0.505447	1.96133	0.971833
	Map1b	STGFIPIKEDFGPEK	OS=Mus musculus GN=Map1b	4.54652e-06	8.9109e-06	0.518246	1.95994	0.970808
	Uba2	LFGEEDADQEVSPDR	OS=Mus musculus GN=Uba2	1.03672e-05	2.03165e-05	0.527306	1.95969	0.970627
	Atp5d	AQSELSGAADEAAR	OS=Mus musculus GN=Atp5d	6.25702e-06	1.22592e-05	0.170222	1.95927	0.970316
	Actb	FAGDDAPR	OS=Mus musculus GN=Actb	0.000306704	0.000600167	0.236638	1.95683	0.968518
	Acly	PAMPQDSVPSPR	OS=Mus musculus GN=Acly	1.14445e-06	2.23933e-06	0.653809	1.95669	0.968417
	Rpsa	LCNTDSPLR	OS=Mus musculus GN=Rpsa	2.80414e-05	5.48512e-05	0.152067	1.95608	0.967966
	Nop9	VLDAIWSGAALGAR	OS=Mus musculus GN=Nop9	1.17363e-06	2.29477e-06	0.515074	1.95527	0.967366
	Slc9a3r1	LVEPGSPAEK	OS=Mus musculus GN=Slc9a3r1	6.93676e-06	1.35623e-05	0.142299	1.95513	0.967266
	Trim28	MNDAFGDTK	OS=Mus musculus GN=Trim28	2.231e-06	4.3609e-06	0.417344	1.95468	0.966934
	Ganab	ALLDTLQLGPDALTVH	OS=Mus musculus GN=Ganab	2.65518e-06	5.17811e-06	0.57055	1.95019	0.963618
	Naa25	SMNLRPEEDDVPWEDLR	OS=Mus musculus GN=Naa25	1.39782e-06	2.72404e-06	0.497248	1.94878	0.96257
	Ptbp1	IELHNHDLGENHHLR	OS=Mus musculus GN=Ptbp1	2.25152e-05	4.38764e-05	0.132668	1.94875	0.96255
	Tln1	SDPAVQAIVLDTASDVLDK	OS=Mus musculus GN=Tln1	2.35758e-06	4.59236e-06	0.518797	1.94791	0.961925
	Nckap1	LGQMIVDYENPLKK	OS=Mus musculus GN=Nckap1	1.1575e-05	2.25463e-05	0.00388421	1.94784	0.961877
	Actn1	HTNYNMEHIR	OS=Mus musculus GN=Actn1	2.71397e-05	5.28563e-05	0.147666	1.94756	0.961671
	Hsp90ab1	SCDELIPEYLNFIR	OS=Mus musculus GN=Hsp90ab1	3.28101e-05	6.38915e-05	0.563748	1.94731	0.961486
	Xrn2	NLTVILSDASAPGEGEHK	OS=Mus musculus GN=Xrn2	2.97766e-06	5.79285e-06	0.430591	1.94544	0.960095
	Flna	LKPGAPLRPK	OS=Mus musculus GN=Flna	8.45574e-05	0.000164456	0.111995	1.9449	0.959695
	Nme1	NIIHGSDSVK	OS=Mus musculus GN=Nme1	0.000106722	0.00020754	0.205644	1.94467	0.959529
	Ddx21	FYGGTPYGGQIER	OS=Mus musculus GN=Ddx21	2.01659e-05	3.92091e-05	0.173415	1.94432	0.959269
	Gclm	AAGALLAR	OS=Mus musculus GN=Gclm	6.33765e-06	1.23214e-05	0.546323	1.94416	0.959145
	Vcp	DHFEEAMR	OS=Mus musculus GN=Vcp	2.81478e-05	5.47187e-05	0.209252	1.94398	0.959013
	Ube2v2	GLEDDEDMTLTR	OS=Mus musculus GN=Ube2v2	9.04616e-06	1.75824e-05	0.240584	1.94363	0.958751
	Eef2	YFDPANGK	OS=Mus musculus GN=Eef2	5.54513e-05	0.000107695	0.0883362	1.94216	0.957659
	Eef1a1	IIDAPGHR	OS=Mus musculus GN=Eef1a1	9.89069e-05	0.000192008	0.515682	1.9413	0.957025
	Npm1	GFEITPPVVLR	OS=Mus musculus GN=Npm1	7.18516e-06	1.39367e-05	0.410236	1.93965	0.955793
	Eef2	IHLPSPVTAQK	OS=Mus musculus GN=Eef2	2.9074e-06	5.63691e-06	0.520872	1.93882	0.955176
	Gars	SCYDLSCHAR	OS=Mus musculus GN=Gars	5.02331e-06	9.73643e-06	0.198359	1.93825	0.954754
	Ugp2	ELSVKKELEK	OS=Mus musculus GN=Ugp2	1.05716e-05	2.04861e-05	0.505585	1.93783	0.954444
	Gnb2l1	GYTDNLVR	OS=Mus musculus GN=Gnb2l1	5.4407e-06	1.05425e-05	0.166189	1.93771	0.95435
	Ctps1	FVGQDVEGER	OS=Mus musculus GN=Ctps1	5.5875e-06	1.0826e-05	0.140366	1.93754	0.954225
	Dync1h1	TEYLSNADER	OS=Mus musculus GN=Dync1h1	3.92402e-06	7.60214e-06	0.445661	1.93734	0.954074
	Parp1	VFSATLGLVDIVK	OS=Mus musculus GN=Parp1	8.2315e-07	1.5939e-06	0.496071	1.93635	0.953336
	gag-pol	IASNQSVDVK	OS=Mus musculus GN=gag-pol	4.49359e-06	8.69554e-06	0.681586	1.9351	0.952408
	Flnb	SLPVEFAIDAR	OS=Mus musculus GN=Flnb	4.58339e-06	8.84771e-06	0.530654	1.93038	0.948888
	mt-Co2	MIPTNDLKPGELR	OS=Mus musculus GN=mt-Co2	6.97244e-06	1.34424e-05	0.514716	1.92793	0.947054
	Flna	GEVEVVIQDPTGQK	OS=Mus musculus GN=Flna	9.48709e-06	1.829e-05	0.536862	1.92788	0.947014
	Cse1l	ALPLTNLFK	OS=Mus musculus GN=Cse1l	1.1705e-05	2.25467e-05	0.4652	1.92624	0.945787
	Ppp2r1a	KLSTIALALGVER	OS=Mus musculus GN=Ppp2r1a	1.16877e-06	2.25128e-06	0.503316	1.92621	0.945763
	Hnrnpk	NTDEMVELR	OS=Mus musculus GN=Hnrnpk	1.78e-05	3.42814e-05	0.202663	1.92592	0.94555
	Dhx36	LSSVSHIVLDEIHER	OS=Mus musculus GN=Dhx36	3.65607e-06	7.04097e-06	0.135079	1.92583	0.945482
	Mdh1	VIVVGNPANTNCLTASK	OS=Mus musculus GN=Mdh1	1.2239e-05	2.35605e-05	0.542069	1.92504	0.944891
	Phgdh	ALVDHENVISCPHLGAS	OS=Mus musculus GN=Phgdh	2.02914e-05	3.90585e-05	0.536913	1.92488	0.94477
	Flnb	AGLAPLEVR	OS=Mus musculus GN=Flnb	2.20227e-05	4.23893e-05	0.539547	1.9248	0.944707
	Ap2a1	FFQPTEMAAQDFFQR	OS=Mus musculus GN=Ap2a1	1.01401e-06	1.95158e-06	0.65133	1.92461	0.944564
	Hsp90ab1	LGIHEDSTNR	OS=Mus musculus GN=Hsp90ab1	8.55233e-05	0.000164559	0.258524	1.92414	0.944216
	Krt8	TEISEMNR	OS=Mus musculus GN=Krt8	7.3968e-06	1.42292e-05	0.14094	1.9237	0.943883
	Adss	GIGPVYSSK	OS=Mus musculus GN=Adss	6.46824e-06	1.24313e-05	0.375695	1.92191	0.942538
	Shmt2	SIFFESMPYK	OS=Mus musculus GN=Shmt2	4.25842e-05	8.17515e-05	0.217633	1.91976	0.940929
	Ehd1	QLPNPVLDSISIIDTPGILSGEK	OS=Mus musculus GN=Ehd1	2.37051e-06	4.54994e-06	0.525114	1.91939	0.94065
	Hnrnpc	GFAFVQYVNER	OS=Mus musculus GN=Hnrnpc	7.30788e-06	1.40256e-05	0.540914	1.91924	0.940538
	Xpnpep1	YAPVPETNR	OS=Mus musculus GN=Xpnpep1	1.62176e-05	3.1125e-05	0.0663093	1.91921	0.940511
	Lyar	LPEQPEEGEAK	OS=Mus musculus GN=Lyar	9.2736e-06	1.77954e-05	0.171115	1.91894	0.940306
	Acly	SFDELGEIIQS	OS=Mus musculus GN=Acly	1.78542e-05	3.4228e-05	0.125192	1.91708	0.938913
	Sfpq	RREEEMMIR	OS=Mus musculus GN=Sfpq	5.53804e-06	1.06117e-05	0.183186	1.91615	0.938211
	Smc2	VLNMKPPEILSMIEEAAGTR	OS=Mus musculus GN=Smc2	4.19834e-06	8.0438e-06	0.446428	1.91595	0.938059
	Aldoa	AIMENANVLAR	OS=Mus musculus GN=Aldoa	2.65599e-05	5.08793e-05	0.166686	1.91564	0.937827
	Qars	VRDVLNDAAPR	OS=Mus musculus GN=Qars	1.73934e-06	3.32785e-06	0.539741	1.91328	0.93605
	Eif3e	NWDAAMEDLTR	OS=Mus musculus GN=Eif3e	1.60576e-05	3.07027e-05	0.491921	1.91203	0.935107
	Myh10	VKPLLQVTR	OS=Mus musculus GN=Myh10	8.69232e-07	1.66185e-06	0.474289	1.91186	0.934974
	Npm1	TVSLGAGAKDELHIVEAEAM	OS=Mus musculus GN=Npm1	2.94825e-05	5.63302e-05	0.41123	1.91063	0.934049
	Cct2	EAAEVILR	OS=Mus musculus GN=Cct2	4.61326e-05	8.81358e-05	0.169537	1.91049	0.933942
	Calm1	FDKDGDGTITTK	OS=Mus musculus GN=Calm1	9.61205e-05	0.00018351	0.266645	1.90916	0.932941
	Cct4	KQMQVLHPAAR	OS=Mus musculus GN=Cct4	1.44466e-05	2.75689e-05	0.184548	1.90833	0.93231
	Gfpt1	VIFLEDDDVAAVVDGR	OS=Mus musculus GN=Gfpt1	6.61008e-06	1.26141e-05	0.490297	1.90831	0.932296
	Trmt1	FQANPEANWGPR	OS=Mus musculus GN=Trmt1	4.16216e-06	7.94126e-06	0.686733	1.90797	0.932036
	Gsto1	EALENEFKK	OS=Mus musculus GN=Gsto1	3.01081e-06	5.74222e-06	0.381894	1.9072	0.931455
	Fasn	TFDDIVHAF	OS=Mus musculus GN=Fasn	3.49058e-06	6.65462e-06	0.230432	1.90645	0.930891
	Tagln2	NFSDNQLQEGK	OS=Mus musculus GN=Tagln2	3.34376e-05	6.37117e-05	0.270432	1.90539	0.930085
	EG433182	VNVVEQEK	OS=Mus musculus GN=EG433182	3.41962e-05	6.51525e-05	0.218346	1.90525	0.929982
	Atp6v0d1	LYPEGLAQLAR	OS=Mus musculus GN=Atp6v0d1	1.17576e-06	2.23966e-06	0.405392	1.90487	0.929691
	Mcm4	VEAIDVEEAKR	OS=Mus musculus GN=Mcm4	8.04164e-06	1.53159e-05	0.151526	1.90457	0.929466
	Rpsa	ADHQPLTEAS	OS=Mus musculus GN=Rpsa	2.41035e-05	4.58835e-05	0.289139	1.90361	0.928735
	Cct6a	HKSETDTSLIR	OS=Mus musculus GN=Cct6a	1.46384e-05	2.78653e-05	0.236195	1.90357	0.928711
	Eif4e	DAVTHIGR	OS=Mus musculus GN=Eif4e	1.592e-05	3.03049e-05	0.277224	1.90357	0.92871
	Eif4b	SLNEESLGNR	OS=Mus musculus GN=Eif4b	1.96021e-05	3.72665e-05	0.264152	1.90115	0.926869
	Scfd1	SLLDVISDPDAGTPEDK	OS=Mus musculus GN=Scfd1	3.10028e-06	5.88724e-06	0.564824	1.89893	0.92519
	Tpt1	FKDGLEMEK	OS=Mus musculus GN=Tpt1	8.15538e-05	0.000154861	0.16865	1.89888	0.925148
	Aip	NIAEGKDPLEGQR	OS=Mus musculus GN=Aip	1.33318e-06	2.53104e-06	0.189618	1.8985	0.924859
	Eif4g1	ERPSQPEGLR	OS=Mus musculus GN=Eif4g1	1.40617e-05	2.66733e-05	0.283627	1.89688	0.923626
	Krt77	LLEGEESR	OS=Mus musculus GN=Krt77	5.15097e-05	9.75804e-05	0.250227	1.89441	0.921748
	Acly	LDFDYVCSR	OS=Mus musculus GN=Acly	3.65008e-06	6.91345e-06	0.367285	1.89406	0.92148
	Hist1h2al	EYLTAEILELAGNAAR	OS=Mus musculus GN=Hist1h2al	7.63164e-05	0.000144231	0.182998	1.88991	0.918318
	Cdc5l	NDFEIVLPENAEK	OS=Mus musculus GN=Cdc5l	5.45743e-06	1.03099e-05	0.549211	1.88914	0.917732
	Fdps	QVQDDYLDLFGDPSVTGK	OS=Mus musculus GN=Fdps	1.84605e-05	3.48665e-05	0.517567	1.88871	0.917399
	Capn2	ALEEAGFK	OS=Mus musculus GN=Capn2	3.84511e-06	7.25408e-06	0.23794	1.88657	0.915765
	Ddx19a	DPSSPLYSVK	OS=Mus musculus GN=Ddx19a	2.35128e-06	4.43547e-06	0.536136	1.88641	0.915643
	Abce1	IAIVNHDK	OS=Mus musculus GN=Abce1	8.16305e-06	1.53961e-05	0.3298	1.88607	0.915386
	Npm1	DLKPSTPR	OS=Mus musculus GN=Npm1	0.000261833	0.000493641	0.183099	1.88532	0.914812
	Cnpy2	ELLEEVCDR	OS=Mus musculus GN=Cnpy2	3.56478e-06	6.71161e-06	0.542366	1.88275	0.912845
	Smc4	LHNTIIDINNR	OS=Mus musculus GN=Smc4	1.313e-06	2.47193e-06	0.162316	1.88266	0.912774
	Tpp2	HEQISDLDR	OS=Mus musculus GN=Tpp2	7.97645e-06	1.50145e-05	0.429622	1.88236	0.91254
	Pgk1	GRPDGVPMPDK	OS=Mus musculus GN=Pgk1	4.84894e-06	9.11389e-06	0.320613	1.87956	0.910397
	Dlst	TPAFAESVTEGDVR	OS=Mus musculus GN=Dlst	4.37724e-06	8.21988e-06	0.208897	1.87787	0.909096
	Pds5b	SIDGTADDEDEGVPTDQAIR	OS=Mus musculus GN=Pds5b	4.4934e-06	8.4346e-06	0.461579	1.87711	0.908512
	Tsc22d1	NSQLEQENNLLK	OS=Mus musculus GN=Tsc22d1	2.4433e-06	4.58545e-06	0.546975	1.87675	0.908234
	Eef1a1	AAGVGEFEAGISK	OS=Mus musculus GN=Eef1a1	1.72061e-05	3.22787e-05	0.244866	1.87601	0.907664
	Pafah1b3	LENGELEHIRPK	OS=Mus musculus GN=Pafah1b3	4.48886e-06	8.42085e-06	0.16016	1.87595	0.907618
	Trip13	VVLLHGPPGTGK	OS=Mus musculus GN=Trip13	5.28526e-06	9.91437e-06	0.157848	1.87585	0.907547
	Gsto1	KLEEGMDNYK	OS=Mus musculus GN=Gsto1	9.94842e-06	1.86582e-05	0.425849	1.8755	0.907273
	Lars	SWPVAGPVDESLIR	OS=Mus musculus GN=Lars	2.09243e-05	3.92093e-05	0.339315	1.87387	0.90602
	Npm1	AMNYEGSPIK	OS=Mus musculus GN=Npm1	2.05179e-05	3.84092e-05	0.292531	1.87198	0.904568
	Pgm2	DPDPEFPTVK	OS=Mus musculus GN=Pgm2	5.29105e-06	9.90212e-06	0.1566	1.87148	0.904183
	Eif4g1	APQPTGPPPAR	OS=Mus musculus GN=Eif4g1	7.01119e-06	1.31161e-05	0.458448	1.87074	0.903607
	Pdcd6ip	TPSNDLYKPLR	OS=Mus musculus GN=Pdcd6ip	2.84594e-06	5.32178e-06	0.196855	1.86995	0.903003
	Sec31a	EIVESCDLK	OS=Mus musculus GN=Sec31a	5.83213e-06	1.08991e-05	0.212743	1.8688	0.902114
	Eif4g1	GPAGLGPR	OS=Mus musculus GN=Eif4g1	4.60729e-06	8.6096e-06	0.287014	1.86869	0.902027
	Rpl4	SNYNLPMHK	OS=Mus musculus GN=Rpl4	0.000106442	0.000198839	0.0940115	1.86805	0.90153
	Hyou1	VLQLINDNTATALSYGVFR	OS=Mus musculus GN=Hyou1	1.13873e-06	2.12658e-06	0.466908	1.8675	0.901112
	Sub1	KGISLNMEQWSQLK	OS=Mus musculus GN=Sub1	4.03106e-06	7.52751e-06	0.353849	1.86738	0.901015
	Pgls	LVPFDHAESTYGLYR	OS=Mus musculus GN=Pgls	1.36309e-05	2.54513e-05	0.291606	1.86718	0.900859
	Cct2	KNIGVDNPAAK	OS=Mus musculus GN=Cct2	6.57325e-05	0.000122721	0.245417	1.86697	0.900699
	Psmc6	VVSSSIVDK	OS=Mus musculus GN=Psmc6	1.51153e-06	2.82176e-06	0.676663	1.86683	0.900587
	Arih1	EVNEVIQNPATITR	OS=Mus musculus GN=Arih1	1.44698e-06	2.69963e-06	0.526961	1.8657	0.899718
	Fkbp5	VLAVNPQNR	OS=Mus musculus GN=Fkbp5	6.16342e-06	1.14802e-05	0.160244	1.86263	0.89734
	Myof	ILHQHLGAPEER	OS=Mus musculus GN=Myof	7.34837e-06	1.36865e-05	0.283532	1.86253	0.89726
	Ipo5	ANEHNVALFK	OS=Mus musculus GN=Ipo5	8.11286e-06	1.51099e-05	0.291283	1.86247	0.897215
	Nars	EDGTFYEFGDDIPEAPERL	OS=Mus musculus GN=Nars	1.17034e-06	2.17906e-06	0.514956	1.86191	0.89678
	Ywhag	AYSEAHEISK	OS=Mus musculus GN=Ywhag	7.91598e-07	1.47344e-06	0.489348	1.86135	0.896351
	Tars	MDGEKPVDASEEK	OS=Mus musculus GN=Tars	6.99688e-06	1.29901e-05	0.464285	1.85656	0.892631
	Rps2	ESEIIDFFLGAS	OS=Mus musculus GN=Rps2	1.48746e-05	2.76155e-05	0.529039	1.85655	0.892622
	Mpi	MEVPSSVTEYK	OS=Mus musculus GN=Mpi	1.21919e-06	2.26272e-06	0.522337	1.85592	0.892135
	Iars	AEPDHMVLGK	OS=Mus musculus GN=Iars	1.25941e-05	2.33664e-05	0.211121	1.85534	0.891686
	Kpna2	HGAIDPLLALL	OS=Mus musculus GN=Kpna2	1.03025e-05	1.91137e-05	0.555986	1.85525	0.891615
	Psmd6	EELMAAVR	OS=Mus musculus GN=Psmd6	1.94745e-06	3.61124e-06	0.510544	1.85434	0.890907
	Npm1	VSLGGFEITPPVVLR	OS=Mus musculus GN=Npm1	7.23813e-05	0.000134041	0.500712	1.85187	0.888981
	Ppp2cb	FHDLMELFR	OS=Mus musculus GN=Ppp2cb	5.97068e-06	1.10528e-05	0.362201	1.85117	0.888438
	Tubgcp3	YLLLGQGDFIR	OS=Mus musculus GN=Tubgcp3	3.86892e-06	7.16051e-06	0.552568	1.85078	0.888133
	Dpysl2	GAQIDDNIPR	OS=Mus musculus GN=Dpysl2	1.14799e-05	2.12438e-05	0.173186	1.85053	0.887937
	Gnb2l1	GHSHFVSDVVIS	OS=Mus musculus GN=Gnb2l1	7.91008e-05	0.000146345	0.403278	1.85011	0.887611
	Canx	AEEDEILNR	OS=Mus musculus GN=Canx	1.72622e-05	3.19151e-05	0.228805	1.84885	0.886627
	Cct7	SVDETIKNPR	OS=Mus musculus GN=Cct7	1.63022e-05	3.0095e-05	0.24133	1.84607	0.884457
	Cct8	RELEVQHPAAK	OS=Mus musculus GN=Cct8	3.40534e-05	6.28565e-05	0.477424	1.84582	0.884261
	Cast	DDTIPPEYR	OS=Mus musculus GN=Cast	7.73714e-06	1.42801e-05	0.219781	1.84566	0.884136
	Fasn	SIPEAQWQSSLAR	OS=Mus musculus GN=Fasn	1.4735e-05	2.71736e-05	0.565404	1.84415	0.882956
	Myh9	SETALPGAFK	OS=Mus musculus GN=Myh9	2.43527e-05	4.49067e-05	0.171059	1.84402	0.882851
	Eif3a	KGPEADSEWR	OS=Mus musculus GN=Eif3a	7.17423e-06	1.32275e-05	0.481816	1.84375	0.882642
	Ncl	AAVPTPAK	OS=Mus musculus GN=Ncl	5.03765e-05	9.28656e-05	0.16852	1.84343	0.882395
	Hnrnpc	LKGDDLQAIKK	OS=Mus musculus GN=Hnrnpc	2.58636e-05	4.7672e-05	0.1638	1.84321	0.882221
	Psmc2	FDDGAGGDNEVQR	OS=Mus musculus GN=Psmc2	1.30588e-05	2.40669e-05	0.172069	1.84296	0.882021
	Utrn	AEAVHEALESLESVLR	OS=Mus musculus GN=Utrn	1.05741e-06	1.94843e-06	0.518964	1.84264	0.881778
	Rpl26	KIMSSPLSK	OS=Mus musculus GN=Rpl26	1.56954e-05	2.8919e-05	0.199938	1.84252	0.881678
	Exosc10	TEDFIVDTLELR	OS=Mus musculus GN=Exosc10	3.56953e-06	6.57476e-06	0.0122166	1.84191	0.881204
	Tln1	ALEATTEHIR	OS=Mus musculus GN=Tln1	1.50495e-06	2.77196e-06	0.442764	1.84189	0.88119
	Sf3a1	EVLDQVCYR	OS=Mus musculus GN=Sf3a1	5.54077e-06	1.01995e-05	0.0795909	1.84081	0.880337
	Eif5a	IVEMSTSK	OS=Mus musculus GN=Eif5a	2.27602e-05	4.18739e-05	0.31855	1.83978	0.879537
	Armc8	MSVLSEVTASSR	OS=Mus musculus GN=Armc8	2.77083e-06	5.09768e-06	0.16497	1.83976	0.879521
	Cndp2	FAELQSPNK	OS=Mus musculus GN=Cndp2	1.54661e-06	2.84539e-06	0.683988	1.83976	0.879517
	Ube2z	LMTTGNNTVR	OS=Mus musculus GN=Ube2z	3.33634e-06	6.12885e-06	0.459305	1.837	0.87735
	Pfn1	GLTLGGQK	OS=Mus musculus GN=Pfn1	4.36069e-05	8.00256e-05	0.103297	1.83516	0.875906
	Psmc5	LLREELQLLQEQGSYVGEVVR	OS=Mus musculus GN=Psmc5	1.65669e-05	3.03942e-05	0.523	1.83463	0.875489
	Mvp	ALQPLEEGEGEEK	OS=Mus musculus GN=Mvp	9.59894e-06	1.76064e-05	0.209687	1.8342	0.875151
	Tpp2	ANNVDYTVHSVR	OS=Mus musculus GN=Tpp2	8.86424e-07	1.62583e-06	0.666013	1.83415	0.87511
	Kif13b	VEVSYMEIY	OS=Mus musculus GN=Kif13b	1.87091e-05	3.43138e-05	0.650417	1.83407	0.875047
	Nars	ISALEGYR	OS=Mus musculus GN=Nars	6.06821e-06	1.11257e-05	0.17494	1.83344	0.874554
	Myof	VHITPSELMDEIISIR	OS=Mus musculus GN=Myof	9.79493e-06	1.79464e-05	0.444071	1.83221	0.873588
	Rps9	SPYGGGRPGR	OS=Mus musculus GN=Rps9	2.18554e-05	4.00347e-05	0.134244	1.8318	0.873262
	Vars	QLLWPAGLGGPGGSR	OS=Mus musculus GN=Vars	3.33934e-06	6.11689e-06	0.526028	1.83177	0.873235
	Flnb	DAGEGLLAVQ	OS=Mus musculus GN=Flnb	3.25947e-06	5.96779e-06	0.196474	1.83091	0.872558
	Krt8	TKTEISEMNR	OS=Mus musculus GN=Krt8	2.0011e-05	3.65891e-05	0.244714	1.82845	0.87062
	Capg	VSDATGQMNLTK	OS=Mus musculus GN=Capg	5.25854e-06	9.6136e-06	0.223461	1.82819	0.870415
	Pitpnb	SKVPAFVR	OS=Mus musculus GN=Pitpnb	7.64299e-06	1.39662e-05	0.0207874	1.82732	0.86973
	Mcm6	YTQPNICR	OS=Mus musculus GN=Mcm6	1.35928e-05	2.48349e-05	0.235543	1.82707	0.869528
	Arf5	VQESADELQK	OS=Mus musculus GN=Arf5	3.38675e-06	6.18129e-06	0.623997	1.82514	0.868006
	Ddx27	SLSFQDMNLSR	OS=Mus musculus GN=Ddx27	4.0162e-06	7.32998e-06	0.177152	1.8251	0.867977
	Abce1	LIDEPSAYLDSEQR	OS=Mus musculus GN=Abce1	6.5184e-06	1.18897e-05	0.389546	1.82403	0.867127
	Fermt1	SLMEQSIQEDEQLQLR	OS=Mus musculus GN=Fermt1	1.0593e-06	1.9316e-06	0.5414	1.82348	0.866692
	Psmd6	AEYLCQIGDK	OS=Mus musculus GN=Psmd6	4.21343e-06	7.6827e-06	0.229236	1.82338	0.866616
	Tubb2b	IREEYPDR	OS=Mus musculus GN=Tubb2b	0.000130507	0.00023793	0.22727	1.82312	0.866412
	Snrpb2	ELGSSTNALR	OS=Mus musculus GN=Snrpb2	6.11585e-06	1.11479e-05	0.0361686	1.82279	0.866149
	Dcps	ALGFEAPGSGVER	OS=Mus musculus GN=Dcps	2.57717e-06	4.69655e-06	0.536736	1.82237	0.865813
	Pcbp2	SRPPVTLR	OS=Mus musculus GN=Pcbp2	4.01685e-05	7.31879e-05	0.108602	1.82202	0.865539
	Actr2	GYAGSNFPEHIFPALVGR	OS=Mus musculus GN=Actr2	1.01655e-05	1.85146e-05	0.492138	1.82131	0.86498
	Cops3	VQLSGPQEAEK	OS=Mus musculus GN=Cops3	5.64318e-06	1.02776e-05	0.0301093	1.82125	0.864926
	Cars	ALVSQCNLYMAAR	OS=Mus musculus GN=Cars	1.11163e-06	2.02403e-06	0.675754	1.82078	0.864559
	Flnb	RLPNNHIGISFIPR	OS=Mus musculus GN=Flnb	1.1218e-05	2.04216e-05	0.224311	1.82044	0.864285
	Msn	QEAEEAKEALLQASR	OS=Mus musculus GN=Msn	1.98569e-06	3.61451e-06	0.562101	1.82028	0.86416
	Ywhab	AVTEQGHELSNEER	OS=Mus musculus GN=Ywhab	2.52832e-05	4.60219e-05	0.303467	1.82025	0.86414
	Tpm1	SLQEQADAAEER	OS=Mus musculus GN=Tpm1	1.45885e-05	2.65479e-05	0.124914	1.81978	0.863767
	Cct8	PAGGPKPPSGK	OS=Mus musculus GN=Cct8	3.94745e-06	7.18321e-06	0.179515	1.81971	0.863707
	Rnh1	ASLQELDLSSNK	OS=Mus musculus GN=Rnh1	6.16908e-06	1.12242e-05	0.584132	1.81944	0.863491
	Msn	IQVWHEEHR	OS=Mus musculus GN=Msn	8.6034e-05	0.000156485	0.0331815	1.81888	0.863048
	Pgam1	WTVLDAIDQMWLPVVR	OS=Mus musculus GN=Pgam1	3.78424e-06	6.88053e-06	0.447504	1.8182	0.862514
	Usp14	TSSSIPPIILLQ	OS=Mus musculus GN=Usp14	8.00718e-06	1.45559e-05	0.186766	1.81786	0.862239
	Rpl32	GQILMPNIGYGSNKK	OS=Mus musculus GN=Rpl32	2.31979e-05	4.21347e-05	0.552287	1.81632	0.861018
	Eef1d	LVPVGYGIR	OS=Mus musculus GN=Eef1d	2.6106e-05	4.74124e-05	0.482225	1.81615	0.860882
	Cad	TSSSFAAAMAR	OS=Mus musculus GN=Cad	9.42983e-06	1.71231e-05	0.540178	1.81584	0.860636
	Plec	RQLLEEELAR	OS=Mus musculus GN=Plec	5.65172e-06	1.02618e-05	0.203128	1.81569	0.86052
	Phgdh	TLGILGLGR	OS=Mus musculus GN=Phgdh	3.34004e-06	6.06194e-06	0.563892	1.81493	0.859913
	Casp3	SGTDVDAANLR	OS=Mus musculus GN=Casp3	1.85778e-05	3.37122e-05	0.197495	1.81465	0.859688
	Hsp90ab1	SLEDPQTHSNR	OS=Mus musculus GN=Hsp90ab1	1.62674e-05	2.95176e-05	0.0370211	1.81452	0.859591
	Hmgb1	GKFEDMAK	OS=Mus musculus GN=Hmgb1	7.20107e-05	0.000130538	0.185238	1.81275	0.858182
	Hnrnpm	MGANSLER	OS=Mus musculus GN=Hnrnpm	1.38747e-06	2.51481e-06	0.541649	1.81251	0.857991
	Pfn1	EGVHGGLINKK	OS=Mus musculus GN=Pfn1	3.67708e-05	6.66312e-05	0.364475	1.81207	0.857636
	Acaca	DFTVASPAEFVTR	OS=Mus musculus GN=Acaca	1.62823e-06	2.94855e-06	0.546676	1.81089	0.856699
	Rrbp1	HLEDIVEK	OS=Mus musculus GN=Rrbp1	2.50088e-06	4.52695e-06	0.17924	1.81015	0.856107
	Pgam1	DAIDQMWLPVVR	OS=Mus musculus GN=Pgam1	4.59988e-05	8.32483e-05	0.500628	1.80979	0.855826
	Gbf1	FLQLESLQELMK	OS=Mus musculus GN=Gbf1	9.88715e-07	1.78896e-06	0.527345	1.80938	0.855492
	Cald1	PSDLRPGDVSGK	OS=Mus musculus GN=Cald1	1.16448e-05	2.10632e-05	0.238465	1.80881	0.855043
	Sf3b1	IVQQIAILMGCAILPHLR	OS=Mus musculus GN=Sf3b1	5.62499e-06	1.01692e-05	0.596026	1.80786	0.854279
	Lamb1	EGFYDLSAEDPYGCK	OS=Mus musculus GN=Lamb1	1.57706e-06	2.85102e-06	0.548148	1.80781	0.854241
	C330027C09Rik	SEANATQLLR	OS=Mus musculus GN=C330027C09Rik	8.825e-07	1.59521e-06	0.667479	1.8076	0.854078
	Akr1b3	NFNPLQIER	OS=Mus musculus GN=Akr1b3	6.57473e-05	0.000118666	0.224355	1.80488	0.851904
	Tsn	GFLAAEQDIR	OS=Mus musculus GN=Tsn	8.37124e-06	1.50907e-05	0.270376	1.80268	0.850146
	Fermt1	IDAVTGIPVTTWR	OS=Mus musculus GN=Fermt1	7.01337e-06	1.26403e-05	0.183892	1.80232	0.849852
	G3bp1	VLAPEGSVANK	OS=Mus musculus GN=G3bp1	1.46202e-05	2.63372e-05	0.188334	1.80143	0.849144
	Ncl	KEAMEDGEIDGNK	OS=Mus musculus GN=Ncl	2.64597e-05	4.76615e-05	0.509183	1.80129	0.84903
	Scrib	LPLLQPETPVSLR	OS=Mus musculus GN=Scrib	6.91688e-07	1.24554e-06	0.513949	1.80073	0.848582
	Huwe1	DHVFEDSYR	OS=Mus musculus GN=Huwe1	8.50756e-07	1.53197e-06	0.666919	1.80071	0.848569
	Fasn	VQEVQQVSTNK	OS=Mus musculus GN=Fasn	5.66392e-06	1.01967e-05	0.53471	1.80029	0.848226
	Hist1h2bj	QVHPDTGISSK	OS=Mus musculus GN=Hist1h2bj	0.000183421	0.000330194	0.355581	1.8002	0.848158
	Abcf2	LLTGELLPTDGMIR	OS=Mus musculus GN=Abcf2	1.02275e-05	1.83931e-05	0.579962	1.79839	0.846706
	Lrpprc	ITELLYKDER	OS=Mus musculus GN=Lrpprc	2.82258e-06	5.07368e-06	0.213758	1.79753	0.846017
	Padi4	ILIGNSGYSSSESR	OS=Mus musculus GN=Padi4	4.28119e-06	7.69141e-06	0.239529	1.79656	0.845236
	Flna	VKVEPSHDASK	OS=Mus musculus GN=Flna	3.62827e-06	6.51808e-06	0.21472	1.79647	0.845166
	Tagln2	EDVGQPQPGR	OS=Mus musculus GN=Tagln2	1.25012e-05	2.24528e-05	0.566307	1.79605	0.844826
	Aars	GAMSTQQIK	OS=Mus musculus GN=Aars	7.78469e-07	1.39783e-06	0.664859	1.79561	0.844478
	Txn	VGEFSGANK	OS=Mus musculus GN=Txn	7.70076e-05	0.00013827	0.273864	1.79554	0.844416
	Coro1b	KCEPIVMTVPR	OS=Mus musculus GN=Coro1b	1.74283e-06	3.12851e-06	0.458826	1.79508	0.844049
	Fasn	VDTALENLSTLK	OS=Mus musculus GN=Fasn	2.63164e-05	4.72397e-05	0.587172	1.79507	0.844039
	Necap1	APVEQYPGIAVETVTDSSR	OS=Mus musculus GN=Necap1	2.01531e-06	3.6172e-06	0.564161	1.79486	0.843873
	Copb2	LESTLNYGMER	OS=Mus musculus GN=Copb2	1.09232e-05	1.96016e-05	0.195087	1.79449	0.843573
	Mthfd1	EHGAFDAVK	OS=Mus musculus GN=Mthfd1	6.30137e-06	1.13075e-05	0.233163	1.79445	0.843541
	Rps2	GIDDCYTSAR	OS=Mus musculus GN=Rps2	2.32129e-05	4.16151e-05	0.152568	1.79276	0.84218
	Eef2	VQTETVLR	OS=Mus musculus GN=Eef2	1.40246e-05	2.51313e-05	0.199842	1.79195	0.84153
	Eif3a	GTDDDRPSWR	OS=Mus musculus GN=Eif3a	7.27719e-06	1.30391e-05	0.296181	1.79178	0.841394
	Hdgf	AGDVLEDSPK	OS=Mus musculus GN=Hdgf	6.16919e-06	1.10525e-05	0.163885	1.79157	0.841227
	Tsta3	VQPTHVIHLAAMVGGLFR	OS=Mus musculus GN=Tsta3	1.9349e-06	3.46649e-06	0.190464	1.79156	0.841213
	Dnmt1	HIPLFPGSDWR	OS=Mus musculus GN=Dnmt1	1.23363e-05	2.20808e-05	0.251065	1.78991	0.839889
	Ddt	VSVTIRPGMTLL	OS=Mus musculus GN=Ddt	4.77018e-06	8.53477e-06	0.480317	1.78919	0.839309
	Cad	GEVRPELGSR	OS=Mus musculus GN=Cad	1.61296e-05	2.8833e-05	0.137106	1.78759	0.838013
	Cct7	GRVPEEDLK	OS=Mus musculus GN=Cct7	1.51084e-05	2.69969e-05	0.619496	1.78688	0.837439
	P4hb	DSTANEVEAVK	OS=Mus musculus GN=P4hb	8.05696e-06	1.43967e-05	0.11007	1.78687	0.837432
	Ppia	ADDEPLGR	OS=Mus musculus GN=Ppia	0.000167258	0.000298837	0.196918	1.78669	0.837286
	Nln	STSHVATFLDDLSQK	OS=Mus musculus GN=Nln	1.58725e-06	2.83469e-06	0.566639	1.78591	0.836661
	Ncl	FIGNLNPNK	OS=Mus musculus GN=Ncl	1.83768e-05	3.28158e-05	0.195911	1.78571	0.836501
	Tubg1	AVLLDLEPR	OS=Mus musculus GN=Tubg1	4.71039e-06	8.41087e-06	0.249276	1.7856	0.836407
	Akap8	IQFACSVCK	OS=Mus musculus GN=Akap8	2.90476e-06	5.18586e-06	0.5763	1.7853	0.836166
	Aprt	AACDLLHQLR	OS=Mus musculus GN=Aprt	3.7781e-06	6.7435e-06	0.29388	1.78489	0.835836
	Ahnak	ISMQDVDLSLGSCK	OS=Mus musculus GN=Ahnak	4.39688e-06	7.84002e-06	0.578757	1.78309	0.834376
	Pgk1	SSMVGVNLPQK	OS=Mus musculus GN=Pgk1	1.95199e-05	3.47924e-05	0.151633	1.78241	0.833827
	Ncl	SEDTTEETLK	OS=Mus musculus GN=Ncl	2.39197e-05	4.26305e-05	0.335913	1.78223	0.833687
	Krt7	NKYEEEINRR	OS=Mus musculus GN=Krt7	4.25975e-06	7.59081e-06	0.48296	1.78198	0.833484
	Eif3h	TAQGSLSLK	OS=Mus musculus GN=Eif3h	6.768e-06	1.20597e-05	0.270268	1.78187	0.833391
	Stip1	TYEEGLKHEANNLQLK	OS=Mus musculus GN=Stip1	7.58657e-06	1.35117e-05	0.591923	1.781	0.832689
	Eif3a	SFGSDLNYATR	OS=Mus musculus GN=Eif3a	1.8395e-05	3.27289e-05	0.257036	1.77922	0.831248
	Luc7l	LHLGFIQIR	OS=Mus musculus GN=Luc7l	1.53231e-06	2.72502e-06	0.275434	1.77837	0.830555
	Psmb6	TTTGSYIANR	OS=Mus musculus GN=Psmb6	1.12606e-05	2.00211e-05	0.293601	1.77798	0.830243
	Eef2	MITIHLPSPVTAQK	OS=Mus musculus GN=Eef2	9.5365e-05	0.000169483	0.426438	1.7772	0.829606
	Ppil1	LAPTQWLDGK	OS=Mus musculus GN=Ppil1	1.26863e-05	2.25432e-05	0.196797	1.77697	0.829419
	Anxa1	ALYEAGER	OS=Mus musculus GN=Anxa1	2.73327e-06	4.85542e-06	0.67083	1.77641	0.828967
	Sfpq	KAELDDTPMR	OS=Mus musculus GN=Sfpq	6.46588e-06	1.14825e-05	0.244838	1.77586	0.828517
	Pabpc1	NPQQHLNAQPQ	OS=Mus musculus GN=Pabpc1	5.45504e-06	9.68481e-06	0.622168	1.77539	0.828133
	Tpt1	LEEQKPER	OS=Mus musculus GN=Tpt1	9.83414e-06	1.7459e-05	0.267315	1.77535	0.828099
	mCG_6739	MNVAEVDR	OS=Mus musculus GN=mCG_6739	3.10787e-05	5.51499e-05	0.519296	1.77452	0.827431
	Psmb1	NIIGGLDEEGK	OS=Mus musculus GN=Psmb1	1.19275e-05	2.11603e-05	0.481054	1.77408	0.82707
	Matr3	DLSAAGIGLLAAATQSLSMPASLGR	OS=Mus musculus GN=Matr3	5.07884e-07	9.00676e-07	0.632757	1.77339	0.82651
	Esd	KAFSGYLGPDESK	OS=Mus musculus GN=Esd	1.8216e-05	3.2295e-05	0.230022	1.77289	0.826105
	Dbnl	NGPALQEAYVR	OS=Mus musculus GN=Dbnl	7.49165e-06	1.32816e-05	0.212927	1.77285	0.826071
	Cope	MFAEYLASENQR	OS=Mus musculus GN=Cope	4.46585e-06	7.91711e-06	0.482873	1.77281	0.826039
	Msn	TANDMIHAE	OS=Mus musculus GN=Msn	4.64205e-05	8.22923e-05	0.0831338	1.77276	0.825995
	Bag6	LQEDPNYSPQR	OS=Mus musculus GN=Bag6	3.52991e-06	6.25616e-06	0.134583	1.77233	0.825644
	Rpl13	STESLQANVQ	OS=Mus musculus GN=Rpl13	9.25611e-06	1.63839e-05	0.210843	1.77007	0.823805
	Ube2m	LFEQNVQR	OS=Mus musculus GN=Ube2m	8.8831e-06	1.57157e-05	0.235928	1.76916	0.823067
	Ran	SNYNFEKPFLWLAR	OS=Mus musculus GN=Ran	3.81564e-05	6.74763e-05	0.609844	1.76841	0.822455
	Rpl18a	IKFPLPHR	OS=Mus musculus GN=Rpl18a	1.41042e-05	2.49317e-05	0.265881	1.76768	0.821855
	Apex1	ALGSDHCPITLY	OS=Mus musculus GN=Apex1	3.53552e-05	6.24857e-05	0.306263	1.76737	0.821604
	Psma4	YLLQYQEPIPCEQLVTAL	OS=Mus musculus GN=Psma4	2.1465e-05	3.79346e-05	0.346096	1.76727	0.821527
	Aldoa	LQSIGTENTEENR	OS=Mus musculus GN=Aldoa	1.82596e-05	3.22692e-05	0.224149	1.76724	0.8215
	Hmgb2	SKFEDLAK	OS=Mus musculus GN=Hmgb2	0.000118674	0.00020972	0.0786999	1.76719	0.821459
	Hspa8	HWPFMVVNDAGR	OS=Mus musculus GN=Hspa8	1.11041e-06	1.96202e-06	0.548265	1.76693	0.821246
	Actr2	MYPGLPSR	OS=Mus musculus GN=Actr2	8.89834e-06	1.57224e-05	0.563783	1.76689	0.821211
	Psmb3	GVIVHVIEK	OS=Mus musculus GN=Psmb3	1.58044e-05	2.79201e-05	0.455216	1.7666	0.820979
	Myh9	MIQLQEELAAAER	OS=Mus musculus GN=Myh9	7.77712e-06	1.37379e-05	0.264353	1.76646	0.820859
	Msn	AQQELEEQTR	OS=Mus musculus GN=Msn	4.92845e-05	8.70289e-05	0.281311	1.76585	0.820362
	Ube2v2	RLLEELEEGQK	OS=Mus musculus GN=Ube2v2	1.3554e-05	2.3934e-05	0.263516	1.76583	0.820344
	Rpl23a	TLIRPDGEK	OS=Mus musculus GN=Rpl23a	3.41347e-05	6.0263e-05	0.517671	1.76545	0.820032
	Bcas2	TIVQLENEIYQIK	OS=Mus musculus GN=Bcas2	3.27415e-06	5.77788e-06	0.226136	1.7647	0.81942
	Txn	EVDVDDCQDVAADCEVK	OS=Mus musculus GN=Txn	1.65319e-05	2.91558e-05	0.512587	1.76361	0.81853
	Cct5	LIIKDQDR	OS=Mus musculus GN=Cct5	1.22287e-05	2.15606e-05	0.351952	1.76311	0.818127
	Aldoa	LQSIGTENTEENRR	OS=Mus musculus GN=Aldoa	6.64619e-05	0.000117148	0.0930457	1.76264	0.817734
	Hspa8	LSKEDIER	OS=Mus musculus GN=Hspa8	5.10563e-05	8.9932e-05	0.299344	1.76143	0.816745
	Sptbn1	LVSDGNINSDR	OS=Mus musculus GN=Sptbn1	1.08958e-06	1.91863e-06	0.688539	1.76088	0.816298
	EG433182	KVNVVEQEK	OS=Mus musculus GN=EG433182	0.000197187	0.000347205	0.322714	1.76079	0.816225
	Efhd2	DGFIDLMELK	OS=Mus musculus GN=Efhd2	5.67087e-06	9.98487e-06	0.599231	1.76073	0.816173
	Dync1h1	GMLHQDHITFAMLLAR	OS=Mus musculus GN=Dync1h1	2.14746e-06	3.78045e-06	0.351841	1.76043	0.81593
	GAPDH	VEIVAINDPFIDLNYM	OS=Mus musculus GN=GAPDH	5.17018e-05	9.10041e-05	0.619376	1.76017	0.815716
	Eef2	KSDPVVSYR	OS=Mus musculus GN=Eef2	8.1346e-06	1.43132e-05	0.11187	1.75955	0.815205
	Vwa5a	YTQDTMEDAVK	OS=Mus musculus GN=Vwa5a	8.21362e-06	1.4444e-05	0.212316	1.75854	0.814378
	Eif3a	HHNQSTAINLNNPESQSMHLETR	OS=Mus musculus GN=Eif3a	1.5616e-06	2.74381e-06	0.7048	1.75705	0.813156
	Actn1	ATLPDADKER	OS=Mus musculus GN=Actn1	2.37176e-05	4.16557e-05	0.178102	1.75632	0.812554
	Mtap	EVLIETAK	OS=Mus musculus GN=Mtap	6.35766e-05	0.000111653	0.269501	1.7562	0.812455
	Smc2	LYIAYQFLR	OS=Mus musculus GN=Smc2	9.68645e-07	1.70059e-06	0.543365	1.75564	0.811997
	Ldha	GEMMDLQHGSLF	OS=Mus musculus GN=Ldha	2.26627e-05	3.97789e-05	0.463003	1.75526	0.811685
	Timm13	CIGKPGGSLDNSEQK	OS=Mus musculus GN=Timm13	2.13377e-06	3.74492e-06	0.576836	1.75507	0.811528
	Tatdn1	VVAIGECGLDFDR	OS=Mus musculus GN=Tatdn1	3.98255e-06	6.9815e-06	0.588999	1.75302	0.809844
	Pitpnb	WIDLTMEDIR	OS=Mus musculus GN=Pitpnb	6.50708e-06	1.14055e-05	0.601179	1.75279	0.809652
	Ppib	DTNGSQFFITTVK	OS=Mus musculus GN=Ppib	3.74786e-06	6.56908e-06	0.718067	1.75275	0.809624
	Mdh2	IQEAGTEVVK	OS=Mus musculus GN=Mdh2	2.86522e-05	5.02082e-05	0.0821661	1.75233	0.809275
	Utp20	LLVPEIDDIMR	OS=Mus musculus GN=Utp20	3.69679e-06	6.47271e-06	0.350449	1.7509	0.808098
	Msn	EGILNDDIYCPPETAVL	OS=Mus musculus GN=Msn	1.4144e-05	2.4757e-05	0.321612	1.75036	0.807653
	Rps9	SRLDQELK	OS=Mus musculus GN=Rps9	6.7936e-05	0.000118909	0.208541	1.75031	0.807609
	Eef1a1	TTGHLIYK	OS=Mus musculus GN=Eef1a1	3.49478e-05	6.1148e-05	0.175587	1.7497	0.807106
	Cand1	IDLRPVLGEGVPILA	OS=Mus musculus GN=Cand1	1.60387e-05	2.80628e-05	0.485493	1.74969	0.8071
	Psmd13	ETIEDVEEMLNNLPGVT	OS=Mus musculus GN=Psmd13	1.30533e-05	2.28392e-05	0.305813	1.74968	0.807094
	Tln1	VEHGSVALPA	OS=Mus musculus GN=Tln1	1.31274e-05	2.29679e-05	0.213607	1.74961	0.807032
	Ykt6	AAYDVSSFSFFQR	OS=Mus musculus GN=Ykt6	1.08266e-06	1.89265e-06	0.694415	1.74814	0.805819
	Hdlbp	EVEVSIPAK	OS=Mus musculus GN=Hdlbp	1.45764e-05	2.54664e-05	0.269118	1.7471	0.80496
	Ahnak	LGGGEVDLK	OS=Mus musculus GN=Ahnak	4.13457e-05	7.223e-05	0.251365	1.74698	0.804862
	RBM8	GYTLVEYETYK	OS=Mus musculus GN=RBM8	4.35121e-06	7.6008e-06	0.591679	1.74683	0.804735
	Tcp1	AAQDSTDLVAK	OS=Mus musculus GN=Tcp1	2.4533e-05	4.28548e-05	0.121301	1.74682	0.804731
	Ide	GYNDKQPILLK	OS=Mus musculus GN=Ide	5.16579e-06	9.02239e-06	0.301715	1.74657	0.804521
	Dync1h1	EYQTQLIQR	OS=Mus musculus GN=Dync1h1	2.63731e-06	4.60616e-06	0.715665	1.74654	0.804496
	Cct2	LAVEAVLR	OS=Mus musculus GN=Cct2	8.9917e-05	0.000157005	0.0141282	1.74611	0.804143
	Lgals1	EDGTWGTEHR	OS=Mus musculus GN=Lgals1	4.65714e-05	8.1294e-05	0.398859	1.74558	0.803704
	Tln1	WSVLAGHSR	OS=Mus musculus GN=Tln1	4.26209e-06	7.43904e-06	0.239819	1.7454	0.803554
	Ppfia1	LELAEQKLQQ	OS=Mus musculus GN=Ppfia1	4.07858e-06	7.11847e-06	0.379074	1.74533	0.803499
	Gsto1	LFPDDPYKK	OS=Mus musculus GN=Gsto1	4.32086e-05	7.53998e-05	0.274534	1.74502	0.803243
	Flna	VPVHDVTDASK	OS=Mus musculus GN=Flna	0.000101992	0.000177705	0.211224	1.74234	0.801029
	Ywhaz	VVSSIEQK	OS=Mus musculus GN=Ywhaz	8.01501e-05	0.00013964	0.264164	1.74223	0.800932
	Txn	SATWCGPCK	OS=Mus musculus GN=Txn	9.48959e-06	1.65312e-05	0.260958	1.74203	0.800773
	Actb	IIAPPERK	OS=Mus musculus GN=Actb	0.000163641	0.000284787	0.37515	1.74032	0.799351
	Sars	GPLVFLEQALIQ	OS=Mus musculus GN=Sars	6.35057e-06	1.10509e-05	0.349019	1.74014	0.7992
	Hsph1	RGPFELEAF	OS=Mus musculus GN=Hsph1	7.90339e-06	1.3748e-05	0.24206	1.73951	0.798682
	Hnrnpk	KGSDFDCELR	OS=Mus musculus GN=Hnrnpk	1.76145e-05	3.06351e-05	0.499015	1.73919	0.798416
	Myh9	DLEGLSQR	OS=Mus musculus GN=Myh9	7.35661e-06	1.27846e-05	0.128558	1.73784	0.797294
	Eef1g	SPDWQVDYESYTWR	OS=Mus musculus GN=Eef1g	8.73379e-06	1.51732e-05	0.450644	1.7373	0.796846
	Rpl34	RAFLIEEQK	OS=Mus musculus GN=Rpl34	1.35073e-05	2.34568e-05	0.143789	1.7366	0.796265
	Prmt5	DLNCVPEIADTLGAVAK	OS=Mus musculus GN=Prmt5	4.66064e-06	8.0906e-06	0.608753	1.73594	0.795717
	Hsp90b1	LGVIEDHSNR	OS=Mus musculus GN=Hsp90b1	7.37785e-05	0.000127975	0.186389	1.73458	0.794588
	Sars	LDLEAWFPGSGAFR	OS=Mus musculus GN=Sars	4.15305e-05	7.2016e-05	0.306024	1.73405	0.794147
	Aim1	SVQPICLDSFTGPR	OS=Mus musculus GN=Aim1	5.81673e-06	1.00845e-05	0.213671	1.73371	0.793862
	Uba1	VVQGHQQLDSYK	OS=Mus musculus GN=Uba1	2.86959e-05	4.97485e-05	0.408347	1.73365	0.79381
	Arpc2	ASHTAPQVLFSHR	OS=Mus musculus GN=Arpc2	8.47123e-06	1.46796e-05	0.0680668	1.73287	0.793166
	Hsp90ab1	ADHGEPIGR	OS=Mus musculus GN=Hsp90ab1	6.09802e-05	0.000105622	0.227741	1.73208	0.792502
	Vim	NYQDTIGR	OS=Mus musculus GN=Vim	5.43519e-05	9.41087e-05	0.234807	1.73147	0.791998
	Tpt1	MTGAAEQIK	OS=Mus musculus GN=Tpt1	9.22387e-05	0.000159695	0.218648	1.73132	0.791876
	Pdia3	RDGEEAGAYDGPR	OS=Mus musculus GN=Pdia3	1.24467e-05	2.15284e-05	0.32301	1.72965	0.79048
	Rad23b	DAFPVAGQK	OS=Mus musculus GN=Rad23b	1.96237e-05	3.39409e-05	0.250201	1.72959	0.790427
	Cops4	ATTADGSSILDR	OS=Mus musculus GN=Cops4	8.16942e-06	1.41234e-05	0.280375	1.72881	0.789777
	Ran	HLTGEFEK	OS=Mus musculus GN=Ran	0.000140562	0.000242998	0.17921	1.72876	0.789736
	Pdia4	IADEEDYATEVK	OS=Mus musculus GN=Pdia4	1.8665e-05	3.22455e-05	0.247278	1.72759	0.788763
	Eif2s3x	HVSFVDCPGHDILMAT	OS=Mus musculus GN=Eif2s3x	1.60129e-05	2.76609e-05	0.323189	1.72741	0.788607
	Gdi2	SITPLEDLYK	OS=Mus musculus GN=Gdi2	3.02214e-05	5.2199e-05	0.363817	1.72722	0.788449
	Arhgdia	TAPGPLELDLTGDLESFK	OS=Mus musculus GN=Arhgdia	2.15029e-05	3.71384e-05	0.539083	1.72714	0.788381
	Ncl	FASFEDAK	OS=Mus musculus GN=Ncl	6.68867e-05	0.000115517	0.240551	1.72705	0.788309
	Psmb6	AIQESGVER	OS=Mus musculus GN=Psmb6	7.64957e-06	1.32092e-05	0.524594	1.72679	0.788093
	Cpne3	APSGEVAIR	OS=Mus musculus GN=Cpne3	8.42954e-06	1.45549e-05	0.13213	1.72665	0.787975
	Eif3j	VYGIDAMNPSSR	OS=Mus musculus GN=Eif3j	4.98024e-06	8.59153e-06	0.272352	1.72512	0.7867
	Mars	LQQHPVLPVPGER	OS=Mus musculus GN=Mars	3.22384e-06	5.56106e-06	0.212333	1.72498	0.78658
	Aldh9a1	EVNLAVENAK	OS=Mus musculus GN=Aldh9a1	6.7614e-06	1.16573e-05	0.277261	1.72409	0.785838
	Ahnak	LQGSGVSLASK	OS=Mus musculus GN=Ahnak	1.4822e-06	2.55516e-06	0.710677	1.7239	0.785674
	Pcyox1	LMHAIGGDDYVR	OS=Mus musculus GN=Pcyox1	2.67504e-06	4.6109e-06	0.260042	1.72368	0.785491
	Ppp4r1	ALLEQELIER	OS=Mus musculus GN=Ppp4r1	6.52861e-06	1.12526e-05	0.286854	1.72358	0.785406
	Flna	SVTIDGPSK	OS=Mus musculus GN=Flna	1.64461e-05	2.83347e-05	0.250682	1.72289	0.784826
	Msn	RKPDTIEVQ	OS=Mus musculus GN=Msn	0.000155737	0.0002682	0.159297	1.72214	0.784198
	Dctn1	ELTNQQEASVER	OS=Mus musculus GN=Dctn1	8.35543e-07	1.43848e-06	0.691072	1.72161	0.783758
	Rpsa	AIVAIENPADVSVIS	OS=Mus musculus GN=Rpsa	4.68077e-05	8.0582e-05	0.322642	1.72156	0.783712
	Dpysl2	IVAPPGGR	OS=Mus musculus GN=Dpysl2	1.9119e-05	3.29105e-05	0.167781	1.72135	0.783542
	Cct8	ELEVQHPAAK	OS=Mus musculus GN=Cct8	1.78784e-05	3.07543e-05	0.107713	1.72019	0.782572
	Khsrp	HSVGVVIGR	OS=Mus musculus GN=Khsrp	3.73736e-05	6.42816e-05	0.122939	1.71998	0.782388
	Mcm5	ATEADVEEALR	OS=Mus musculus GN=Mcm5	2.22348e-05	3.82432e-05	0.212922	1.71997	0.782382
	Ptbp1	VTPQSLFILF	OS=Mus musculus GN=Ptbp1	1.48678e-05	2.55693e-05	0.536626	1.71977	0.78222
	Cse1l	DLEGSDIDTR	OS=Mus musculus GN=Cse1l	1.85755e-05	3.19438e-05	0.131044	1.71967	0.782134
	Anxa1	SVNQDLADTDAR	OS=Mus musculus GN=Anxa1	0.000122636	0.000210875	0.0777668	1.71952	0.78201
	Fxr1	IEGDNENKLPR	OS=Mus musculus GN=Fxr1	6.08916e-06	1.04659e-05	0.419439	1.71878	0.781388
	Idh1	ATDFVVPGPGK	OS=Mus musculus GN=Idh1	1.00863e-05	1.73344e-05	0.261452	1.71861	0.781241
	Cast	GVVPEDAVETLAGSLGTR	OS=Mus musculus GN=Cast	7.93093e-07	1.36199e-06	0.684824	1.71732	0.780158
	Chaf1b	AIVEFLSNLAR	OS=Mus musculus GN=Chaf1b	1.74096e-06	2.98748e-06	0.589297	1.71599	0.779043
	Dync1h1	GIVTEVEQYVK	OS=Mus musculus GN=Dync1h1	1.02192e-05	1.75332e-05	0.426846	1.71571	0.778809
	Lmna	YEAELGDAR	OS=Mus musculus GN=Lmna	4.42275e-05	7.58567e-05	0.180932	1.71515	0.778331
	Ywhaz	EKIETELR	OS=Mus musculus GN=Ywhaz	0.000101784	0.000174425	0.169445	1.71369	0.777103
	Golga3	AYENAVSILSR	OS=Mus musculus GN=Golga3	3.66125e-06	6.26828e-06	0.267129	1.71206	0.775733
	Blmh	LMNPTNDGGQWDMLVNIVEK	OS=Mus musculus GN=Blmh	8.09421e-06	1.38525e-05	0.344152	1.71141	0.775182
	Nsun2	GAEQLAEGGR	OS=Mus musculus GN=Nsun2	5.07008e-06	8.67638e-06	0.313978	1.71129	0.775084
	Txnl1	TNNISATPTFLFFR	OS=Mus musculus GN=Txnl1	4.60956e-06	7.88691e-06	0.230617	1.71099	0.774832
	Ccdc58	IVHELNTTVPTASFAGK	OS=Mus musculus GN=Ccdc58	1.41545e-05	2.42046e-05	0.121011	1.71003	0.774023
	Rpl3	ASTDYDLSDK	OS=Mus musculus GN=Rpl3	4.35062e-05	7.43657e-05	0.0790751	1.70931	0.773416
	Fasn	PGSPELQQVLK	OS=Mus musculus GN=Fasn	7.4025e-06	1.26528e-05	0.11469	1.70926	0.773371
	Rpl11	PGFSIADK	OS=Mus musculus GN=Rpl11	1.74961e-05	2.98849e-05	0.233172	1.70809	0.772385
	Actn1	NYITEDELR	OS=Mus musculus GN=Actn1	7.08508e-05	0.000120973	0.242153	1.70744	0.771831
	Dhx15	FQIYFDNCPLLTIPGR	OS=Mus musculus GN=Dhx15	7.62284e-05	0.000130154	0.50162	1.70742	0.771819
	Vapa	FMVQTIFAPPNISDMEAVWK	OS=Mus musculus GN=Vapa	1.42853e-06	2.43652e-06	0.585164	1.70562	0.770293
	Gtf2i	FAQALGLTEAVK	OS=Mus musculus GN=Gtf2i	1.51372e-06	2.58167e-06	0.509244	1.70551	0.770206
	Ipo5	HFADLLPGFLQAV	OS=Mus musculus GN=Ipo5	9.07897e-06	1.54824e-05	0.358623	1.70531	0.770033
	Lmna	LLEGEEER	OS=Mus musculus GN=Lmna	2.48076e-05	4.23041e-05	0.110392	1.70529	0.770015
	Aldoa	IGGVILFHETLYQK	OS=Mus musculus GN=Aldoa	8.44965e-07	1.44005e-06	0.569725	1.70427	0.769157
	Psmc4	AVAHHTTAAFIR	OS=Mus musculus GN=Psmc4	3.06703e-06	5.22568e-06	0.509204	1.70382	0.768776
	Npm1	GGFEITPPVVLR	OS=Mus musculus GN=Npm1	1.44102e-05	2.45512e-05	0.480174	1.70374	0.768707
	Tcp1	AVNAAQDSTDLVAK	OS=Mus musculus GN=Tcp1	5.53432e-06	9.42871e-06	0.274517	1.70368	0.768655
	Ipo5	YVCDNSPEVR	OS=Mus musculus GN=Ipo5	2.12573e-05	3.62118e-05	0.0597493	1.7035	0.768502
	Lcp1	VSDEEMMELR	OS=Mus musculus GN=Lcp1	1.35362e-05	2.30564e-05	0.290617	1.70331	0.768345
	Csde1	VGDDVEFEVSSDR	OS=Mus musculus GN=Csde1	9.13816e-07	1.55627e-06	0.557653	1.70304	0.768113
	Actb	KAGFAGDDAPR	OS=Mus musculus GN=Actb	0.000100722	0.000171465	0.226021	1.70236	0.767532
	Cops2	SAIPHPLIMGVIR	OS=Mus musculus GN=Cops2	8.03199e-06	1.36726e-05	0.63147	1.70227	0.767459
[truncated: 21,224 more rows]

## Sheet: Supplementary Table 4
	Supplementary Table 4. The RNA-seq data for the analysis of control (sgCtrl) and Uba6-null (sgUba6) 4T1 cells.
	GeneID	GeneName	Chr	Strand	Start	End	Class	KO-1	KO-2	KO-3	NTC-1	NTC-2	NTC-3	Fold Change (sgUba6 vs sgCtrl)	P-value	FDR value
	ENSMUSG00000028364	Tnc	4	-	63959785	64047015	protein_coding	18.6877	18.6355	17.2247	1.04417	0.927602	0.906867	18.7641	5.89752e-287	1.29816e-282
	ENSMUSG00000027750	Postn	3	+	54361109	54391037	protein_coding	14.2573	14.5398	14.9985	161.774	146.986	154.366	0.0946238	1.2588e-271	1.38544e-267
	ENSMUSG00000056492	Adgrf5	17	+	43360451	43459557	protein_coding	13.5091	12.3841	12.669	0.407553	0.773284	0.771797	19.4651	1.11733e-217	8.1982e-214
	ENSMUSG00000024479	Mal2	15	+	54571192	54602847	protein_coding	24.1508	23.4067	24.0022	1.83911	1.90566	2.19004	12.002	2.39386e-179	1.31734e-175
	ENSMUSG00000028780	Sema3c	5	+	17574281	17730268	protein_coding	11.883	12.0806	12.2025	0.966776	1.02179	0.792344	12.877	4.08054e-170	1.79642e-166
	ENSMUSG00000031119	Gpc4	X	-	52053021	52165252	protein_coding	21.0034	20.9105	19.6234	1.3331	1.41444	1.4403	14.5969	1.67839e-169	6.15746e-166
	ENSMUSG00000028766	Alpl	4	-	137741733	137796384	protein_coding	37.5298	35.3641	36.5212	2.08414	2.21785	1.27126	19.5324	2.42669e-169	7.63091e-166
	ENSMUSG00000020159	Gabrp	11	-	33550781	33578959	protein_coding	8.76358	8.70491	8.40761	0.171289	0.183687	0.151765	48.2656	7.98189e-158	2.19622e-154
	ENSMUSG00000027737	Slc7a11	3	-	49892526	50443614	protein_coding	0.575595	0.518578	0.498545	5.57702	6.58051	5.57196	0.0913719	3.16397e-149	7.73837e-146
	ENSMUSG00000029304	Spp1	5	+	104435118	104441050	protein_coding	233.956	239.438	240.18	48.7226	42.8475	44.507	5.24296	1.21512e-140	2.67473e-137
	ENSMUSG00000045954	Cavin2	1	+	51289126	51302960	protein_coding	28.5526	28.8818	29.4216	4.46973	4.53273	4.26358	6.53473	1.85549e-140	3.71301e-137
	ENSMUSG00000026837	Col5a1	2	+	27886425	28039514	protein_coding	7.15626	6.50913	7.28027	0.458244	0.643873	0.524366	12.6628	1.21874e-135	2.23558e-132
	ENSMUSG00000017737	Mmp9	2	+	164940780	164955850	protein_coding	176.872	163.063	173.734	37.8953	37.3362	38.7338	4.50632	4.00994e-125	6.78975e-122
	ENSMUSG00000035557	Krt17	11	-	100256217	100261029	protein_coding	21.6509	21.3656	22.0914	0.957865	0.953814	1.27764	20.2334	1.32535e-124	2.08383e-121
	ENSMUSG00000025867	Cplx2	13	+	54371349	54383917	protein_coding	0	0	0	2.19756	2.23186	2.01085	0.00463659	2.28183e-119	3.34851e-116
	ENSMUSG00000026822	Lcn2	2	-	32384633	32388252	protein_coding	90.1368	80.0981	84.9123	14.1014	15.1951	12.7681	6.06199	4.76872e-105	6.56056e-102
	ENSMUSG00000038587	Akap12	10	+	4266380	4359470	protein_coding	47.8466	44.9593	46.9123	11.8909	10.9786	11.8077	4.02649	7.11159e-101	9.20826e-98
	ENSMUSG00000071656	Lrrn4cl	19	+	8850768	8853909	protein_coding	41.8677	37.1478	39.556	7.10027	8.10994	6.4989	5.45567	2.49436e-94	3.05032e-91
	ENSMUSG00000031626	Sorbs2	8	+	45507788	45827906	protein_coding	56.1199	83.9923	81.53	22.4456	22.3385	19.9724	3.42158	6.47495e-93	7.50139e-90
	ENSMUSG00000043613	Mmp3	9	+	7445822	7455975	protein_coding	17.4766	22.367	19.8715	1.8331	1.81314	1.89451	10.7248	4.18653e-92	4.6077e-89
	ENSMUSG00000022231	Sema5a	15	+	32244810	32696341	protein_coding	0.094009	0.108201	0.129804	2.02067	2.0425	2.21149	0.0574201	2.31403e-91	2.42554e-88
	ENSMUSG00000005124	Ccn4	15	+	66891320	66923201	protein_coding	13.9669	13.7685	13.0937	48.0387	48.3213	45.6787	0.287601	1.52721e-89	1.52804e-86
	ENSMUSG00000028699	Tspan1	4	-	116161869	116167601	protein_coding	11.7419	11.0256	11.4729	0.624871	0.878703	0.758341	14.9527	2.29514e-87	2.19654e-84
	ENSMUSG00000040249	Lrp1	10	-	127538161	127621148	protein_coding	23.3199	22.0306	30.621	6.67783	6.31003	5.76769	4.04574	6.13964e-87	5.63107e-84
	ENSMUSG00000022479	Vdr	15	-	97854425	97910630	protein_coding	18.8736	19.4496	20.39	4.80051	4.373	3.87495	4.4916	9.09345e-87	8.0066e-84
	ENSMUSG00000028019	Pdgfc	3	+	81036416	81214040	protein_coding	4.56933	4.19456	4.44636	0.11974	0.062299	0.084952	44.5813	2.71651e-86	2.29984e-83
	ENSMUSG00000034573	Ptpn13	5	+	103425192	103598303	protein_coding	12.2045	11.3969	11.8776	2.63485	2.60879	2.86372	4.3637	6.38745e-86	5.20743e-83
	ENSMUSG00000021559	Dapk1	13	+	60601947	60763191	protein_coding	0	0.005098	0.003124	1.38566	1.30719	1.2299	0.00966972	4.42171e-84	3.4761e-81
	ENSMUSG00000028164	Manba	3	+	135485611	135571404	protein_coding	7.70244	6.98416	7.95959	32.3753	32.7422	30.0222	0.238271	3.32258e-83	2.52195e-80
	ENSMUSG00000021506	Pitx1	13	-	55825051	55836192	protein_coding	0.681997	0.486226	0.419141	10.9061	10.9998	8.93281	0.0523949	6.96423e-82	5.10989e-79
	ENSMUSG00000038677	Scube3	17	+	28142141	28174854	protein_coding	2.92398	2.84604	3.13706	0.147114	0.246726	0.152899	15.4959	1.03352e-80	7.33867e-78
	ENSMUSG00000007039	Ddah2	17	+	35059035	35062095	protein_coding	37.2754	34.2298	34.3413	6.30375	6.88939	5.89623	5.53766	3.32553e-79	2.28755e-76
	ENSMUSG00000024727	Trpm6	19	+	18749983	18892511	protein_coding	0.174709	0.089625	0.122919	3.04758	3.06172	3.37071	0.0438751	3.59403e-79	2.39733e-76
	ENSMUSG00000029648	Flt1	5	-	147561604	147726011	protein_coding	9.53733	10.1846	10.8702	2.32294	2.34586	2.31438	4.36637	6.78678e-78	4.39384e-75
	ENSMUSG00000024164	C3	17	-	57203970	57228136	protein_coding	136.69	127.756	135.558	43.3258	38.1554	38.8069	3.3248	9.28969e-78	5.84242e-75
	ENSMUSG00000001119	Col6a1	10	-	76708792	76726168	protein_coding	13.4693	12.3564	12.6233	2.76788	2.61953	2.90078	4.62589	2.50205e-73	1.52987e-70
	ENSMUSG00000020865	Abcc3	11	-	94343295	94392997	protein_coding	8.63847	8.95881	9.19637	1.73187	1.89454	1.80992	4.90707	8.26411e-73	4.91648e-70
	ENSMUSG00000039497	Dse	10	-	34151393	34207715	protein_coding	10.5304	11.3024	9.85272	1.84401	1.55824	1.35833	6.62039	4.19882e-72	2.43222e-69
	ENSMUSG00000033327	Tnxb	17	+	34670535	34719815	protein_coding	0.660815	0.685546	0.527449	0.007526	0.002902	0	47.0914	4.54242e-72	2.56379e-69
	ENSMUSG00000055301	Adh7	3	+	138217760	138233382	protein_coding	1.96068	2.10009	2.40027	13.4959	11.8008	11.7209	0.175208	2.27064e-71	1.24953e-68
	ENSMUSG00000025938	Slco5a1	1	-	12866549	12992650	protein_coding	3.58382	3.73505	3.56635	0.49285	0.514191	0.505563	7.07584	2.50204e-70	1.34329e-67
	ENSMUSG00000039405	Prss23	7	-	89507783	89527187	protein_coding	18.1179	18.8512	18.5825	58.8676	55.6865	63.643	0.311858	6.48218e-69	3.39728e-66
	ENSMUSG00000025810	Nrp1	8	+	128358604	128503363	protein_coding	6.73684	7.16441	7.21875	24.8551	22.6294	24.71	0.292837	4.95421e-67	2.53609e-64
	ENSMUSG00000042804	Gpr153	4	+	152274232	152285337	protein_coding	3.36487	2.87499	3.83966	0.185284	0.132146	0.140777	20.7074	4.96182e-66	2.48226e-63
	ENSMUSG00000029307	Dmp1	5	+	104202613	104214102	protein_coding	3.93344	4.94358	4.40763	0.237856	0.148141	0.175926	22.4939	5.56382e-66	2.72157e-63
	ENSMUSG00000020303	Stc2	11	-	31357307	31370074	protein_coding	0.849647	1.10099	0.883877	7.07907	6.71564	6.22258	0.142888	5.76828e-66	2.76025e-63
	ENSMUSG00000037370	Enpp1	10	-	24637914	24712159	protein_coding	1.58652	2.74355	1.88077	0.101878	0.069536	0.074578	22.6124	1.02505e-65	4.80074e-63
	ENSMUSG00000061411	Nol4l	2	-	153407462	153529971	protein_coding	5.85639	4.84602	5.80437	0.628306	0.912182	0.842433	6.85343	4.37971e-64	2.00846e-61
	ENSMUSG00000004655	Aqp1	6	+	55336432	55348555	protein_coding	8.91917	8.41513	8.29244	1.16239	1.04396	1.0798	7.73691	7.69885e-64	3.45851e-61
	ENSMUSG00000033389	Arhgap44	11	-	65002039	65162961	protein_coding	1.33883	1.57171	1.48899	0.018084	0	0.016328	68.7687	8.91462e-64	3.92457e-61
	ENSMUSG00000020088	Sar1a	10	+	61680299	61693297	protein_coding	22.5398	23.1736	21.3475	59.0637	65.2008	63.5101	0.357238	1.02257e-63	4.41348e-61
	ENSMUSG00000047250	Ptgs1	2	+	36230426	36252272	protein_coding	1.66236	2.34573	2.05587	14.3631	12.4272	13.8863	0.149704	1.16224e-63	4.91987e-61
	ENSMUSG00000020601	Trib2	12	-	15791727	15816922	protein_coding	4.97534	4.79706	4.9799	0.58038	0.525527	0.605932	8.48661	3.67923e-63	1.52806e-60
	ENSMUSG00000007888	Crlf1	8	+	70493158	70504081	protein_coding	8.8892	8.97127	9.66366	0.720678	0.467663	0.443465	16.5808	2.77148e-62	1.12974e-59
	ENSMUSG00000097709	2810429I04Rik	13	+	3478230	3501393	lincRNA	0	0	0	2.40633	2.11761	2.97404	0.00398513	1.41404e-60	5.65926e-58
	ENSMUSG00000030693	Klk10	7	+	43781035	43785410	protein_coding	3.87773	3.96219	3.80625	22.4749	20.8886	20.2382	0.183496	2.26856e-60	8.91708e-58
	ENSMUSG00000030630	Fah	7	-	84585159	84606722	protein_coding	16.6223	19.7786	19.4709	2.6012	1.9487	2.66381	7.71729	3.62277e-60	1.39903e-57
	ENSMUSG00000024043	Arhgap28	17	-	67842713	68004120	protein_coding	5.91459	6.02721	5.70781	1.01323	0.864965	0.907512	6.27892	6.49411e-60	2.46463e-57
	ENSMUSG00000032232	Cgnl1	9	-	71626509	71771602	protein_coding	79.4141	81.0175	68.8463	29.8611	30.2341	30.2658	2.53684	3.7675e-58	1.4056e-55
	ENSMUSG00000031438	Rnf128	X	+	139563316	139673145	protein_coding	11.929	12.2556	12.1559	2.14458	2.53614	2.29264	5.19329	9.96822e-58	3.65701e-55
	ENSMUSG00000022241	Tars	15	-	11382301	11399665	protein_coding	29.6493	30.525	29.5493	75.4618	79.0967	79.6732	0.383134	1.17556e-57	4.24204e-55
	ENSMUSG00000017607	Tns4	11	-	99065678	99089306	protein_coding	76.1198	77.8721	79.2111	29.9729	29.2051	27.7427	2.68236	2.15039e-57	7.63458e-55
	ENSMUSG00000028927	Padi2	4	+	140906344	140952586	protein_coding	12.4227	12.3891	12.5486	3.28239	3.57151	3.63422	3.55486	2.83856e-57	9.91784e-55
	ENSMUSG00000020826	Nos2	11	+	78920787	78960254	protein_coding	74.5942	68.291	73.2106	27.0743	24.668	24.8239	2.82163	2.38334e-56	8.19721e-54
	ENSMUSG00000096054	Syne1	10	-	5020917	5551482	protein_coding	23.2988	22.7275	23.4075	8.24337	8.10016	8.12899	2.83497	3.96425e-56	1.34248e-53
	ENSMUSG00000040852	Plekhh2	17	+	84511895	84622138	protein_coding	3.2353	3.11056	3.35857	0.458403	0.310131	0.491416	7.54636	6.98691e-56	2.33024e-53
	ENSMUSG00000062098	Btbd3	2	+	138256565	138589292	protein_coding	33.2748	30.856	31.1818	11.2528	10.933	11.265	2.84768	2.38147e-55	7.824e-53
	ENSMUSG00000045636	Mtus1	8	-	40990914	41133726	protein_coding	3.59461	3.52684	3.82536	0.376378	0.292111	0.396948	10.0205	3.63987e-55	1.17825e-52
	ENSMUSG00000032561	Acpp	9	-	104288251	104337748	protein_coding	7.69926	8.28865	7.77628	1.61895	1.80948	1.67923	4.63133	4.32044e-55	1.37828e-52
	ENSMUSG00000019890	Nts	10	-	102481756	102490486	protein_coding	59.8632	56.4729	60.0007	18.2205	19.1171	18.5809	3.15231	6.95941e-55	2.18843e-52
	ENSMUSG00000027313	Chac1	2	+	119351229	119354381	protein_coding	9.3703	9.60106	10.2239	37.0363	32.8918	31.9433	0.286799	2.86454e-54	8.88089e-52
	ENSMUSG00000028943	Espn	4	-	152120331	152152371	protein_coding	12.7972	12.5963	13.4408	1.86535	1.76096	1.40042	7.68566	1.90967e-53	5.83827e-51
	ENSMUSG00000030562	Nox4	7	+	87246096	87398710	protein_coding	2.9365	3.61029	3.84497	0.285621	0.323265	0.265394	11.5249	3.68344e-53	1.11068e-50
	ENSMUSG00000042659	Arrdc4	7	-	68736995	68749241	protein_coding	10.236	9.75329	10.0765	2.70068	2.19143	2.11811	4.27484	6.80311e-53	2.02365e-50
	ENSMUSG00000066000	Zfp979	4	-	147611937	147642513	protein_coding	0.41363	0.56621	0.57965	5.26201	5.36754	5.50954	0.0983042	9.11762e-53	2.67596e-50
	ENSMUSG00000021950	Anxa8	14	+	34085981	34100571	protein_coding	14.7452	15.3525	14.0707	44.9058	41.6707	43.9799	0.338461	1.53442e-52	4.44415e-50
	ENSMUSG00000041548	Hspb8	5	-	116408491	116422864	protein_coding	45.9893	42.7457	41.6721	13.9281	14.6291	13.4008	3.10653	2.13541e-52	6.1045e-50
	ENSMUSG00000031700	Gpt2	8	+	85492576	85527560	protein_coding	14.2499	16.0905	13.819	41.795	44.7168	40.3948	0.348122	6.0536e-52	1.70836e-49
	ENSMUSG00000023927	Satb1	17	-	51736187	51833290	protein_coding	0.972546	1.1097	1.09871	0.015611	0.027154	0	44.1278	7.62424e-52	2.12436e-49
	ENSMUSG00000024379	Tslp	18	+	32815383	32819797	protein_coding	32.2008	36.8249	35.6164	9.08903	7.89702	7.9523	4.19219	1.5395e-51	4.23594e-49
	ENSMUSG00000025328	Padi3	4	-	140785365	140810648	protein_coding	27.3276	25.8988	25.426	8.88931	7.9983	8.86682	3.05155	3.42355e-51	9.3036e-49
	ENSMUSG00000026380	Tfcp2l1	1	+	118627945	118685168	protein_coding	1.46166	1.42159	1.39389	0.163042	0.173688	0.150302	8.33051	5.87652e-51	1.57749e-48
	ENSMUSG00000002057	Foxn1	11	-	78357577	78386558	protein_coding	4.61941	4.33779	4.80387	0.570377	0.480365	0.597933	8.21545	1.20702e-50	3.20107e-48
	ENSMUSG00000042156	Dzip1	14	-	118875520	118925460	protein_coding	3.19831	3.89609	3.77494	0.243308	0.348243	0.165555	13.8474	5.47074e-50	1.4336e-47
	ENSMUSG00000026193	Fn1	1	-	71585520	71653200	protein_coding	991.756	933.762	1015.52	368.723	419.112	348.776	2.58751	8.75841e-48	2.26812e-45
	ENSMUSG00000031647	Mfap3l	8	+	60632827	60676729	protein_coding	1.92882	1.89169	1.8532	6.84895	6.3122	6.39837	0.291161	2.02636e-47	5.18655e-45
	ENSMUSG00000031937	Vstm5	9	+	15239045	15259416	protein_coding	0.030135	0	0.028724	1.61072	1.64525	1.56661	0.0183117	2.94291e-47	7.4459e-45
	ENSMUSG00000053965	Pde5a	3	+	122728947	122859374	protein_coding	0.723004	0.795525	0.727223	0.029243	0.014426	0.030622	21.8212	2.15938e-46	5.4014e-44
	ENSMUSG00000075700	Selenot	3	+	58576636	58593133	protein_coding	38.2978	40.3785	37.7	89.6535	91.8532	95.2048	0.420632	4.20354e-46	1.03964e-43
	ENSMUSG00000032496	Ltf	9	+	111019271	111042767	protein_coding	1.05143	1.23387	1.02581	0	0.019992	0	66.8329	1.13829e-45	2.784e-43
	ENSMUSG00000019647	Sema6a	18	-	47235598	47368870	protein_coding	2.51514	2.16273	2.22959	0.093951	0.146873	0.21242	14.356	1.4324e-45	3.46484e-43
	ENSMUSG00000029082	Bst1	5	+	43818885	43843986	protein_coding	26.6567	29.3801	24.8036	9.59442	8.4544	9.52228	2.92997	7.43998e-45	1.7801e-42
	ENSMUSG00000027533	Fabp5	3	+	10012548	10016607	protein_coding	30.4011	31.5276	27.9544	79.7009	86.379	79.8969	0.36549	1.67633e-44	3.96768e-42
	ENSMUSG00000038146	Notch3	17	-	32120820	32166852	protein_coding	1.26457	1.36882	1.53833	0.098035	0.2883	0.101959	8.10683	2.27234e-44	5.32113e-42
	ENSMUSG00000025742	Prps2	X	-	167346322	167382749	protein_coding	9.57699	10.0015	9.81648	24.673	24.4554	25.807	0.392514	6.26582e-44	1.45182e-41
	ENSMUSG00000024042	Sik1	17	-	31844250	31855804	protein_coding	38.3439	36.5375	37.9206	15.573	15.2006	14.0384	2.51621	6.33529e-44	1.45263e-41
	ENSMUSG00000004633	Chn2	6	+	54039554	54301810	protein_coding	0	0	0.023494	1.32253	1.01293	1.36509	0.0143394	6.8448e-44	1.55327e-41
	ENSMUSG00000020641	Rsad2	12	-	26442746	26456452	protein_coding	2.75395	3.10866	2.77057	0.325112	0.382604	0.35048	7.96105	9.09914e-44	2.04378e-41
	ENSMUSG00000054520	Sh3bp2	5	+	34525838	34563641	protein_coding	4.90835	4.24407	4.9483	16.4092	16.8046	15.4406	0.290251	2.39885e-43	5.33369e-41
	ENSMUSG00000046873	Mbtps2	X	-	157535371	157598715	protein_coding	11.5586	11.8807	11.3568	29.8003	26.0696	27.1313	0.419434	2.89856e-43	6.3803e-41
	ENSMUSG00000118383	AC132253.9	19	-	9828899	9836897	lincRNA	2.23375	2.88011	2.48098	0.152226	0.144343	0.073746	19.0471	4.89576e-43	1.06698e-40
	ENSMUSG00000053702	Nebl	2	-	17343909	17731464	protein_coding	0.977153	1.1492	0.997733	0.052953	0.033428	0.036805	20.5899	5.22781e-43	1.12818e-40
	ENSMUSG00000025475	Adgra1	7	+	139834174	139878088	protein_coding	2.4105	2.84965	2.39509	0.344067	0.347168	0.352338	7.15856	5.90907e-43	1.26282e-40
	ENSMUSG00000024640	Psat1	19	-	15904678	15947337	protein_coding	67.472	70.8542	67.9059	151.89	151.956	153.444	0.451024	9.66593e-43	2.04583e-40
	ENSMUSG00000033684	Qsox1	1	-	155776029	155812889	protein_coding	29.8722	26.6191	27.3761	10.1595	10.2591	8.76438	2.87192	2.2534e-42	4.72398e-40
	ENSMUSG00000024331	Dsc2	18	-	20030633	20059554	protein_coding	7.60725	6.73223	7.54942	1.81461	1.94203	2.01029	3.78112	2.83483e-42	5.88682e-40
	ENSMUSG00000041481	Serpina3g	12	+	104236245	104241939	protein_coding	0.318596	0.191008	0.143789	7.0301	5.3865	6.89394	0.0353347	3.94957e-42	8.12503e-40
	ENSMUSG00000076431	Sox4	13	-	28948919	28953713	protein_coding	110.291	107.282	107.391	45.1697	49.589	45.2273	2.32112	4.3019e-42	8.76791e-40
	ENSMUSG00000049532	Sall2	14	-	52311172	52328762	protein_coding	1.30759	1.4237	1.41302	0.043706	0.087511	0.095164	16.2817	4.57115e-42	9.2312e-40
	ENSMUSG00000054942	Miga1	3	-	152273849	152340407	protein_coding	6.27444	7.00185	7.19725	17.252	17.6215	17.1191	0.394128	1.09999e-41	2.20118e-39
	ENSMUSG00000027808	Serp1	3	-	58519817	58525892	protein_coding	22.0327	22.4379	21.475	47.8207	50.0076	51.334	0.442219	2.04268e-41	4.05076e-39
	ENSMUSG00000012819	Cdh23	10	-	60302748	60696490	protein_coding	0.914955	1.14827	0.743966	0.081377	0.043323	0.108778	10.7682	2.99923e-41	5.89456e-39
	ENSMUSG00000032715	Trib3	2	-	152337422	152344032	protein_coding	12.077	13.6649	11.5655	43.8713	45.8292	34.4771	0.300605	3.65605e-41	7.12186e-39
	ENSMUSG00000030409	Dmpk	7	+	19083849	19093821	protein_coding	15.7302	14.6097	14.4802	4.29169	3.55403	4.29679	3.68454	4.40889e-41	8.51302e-39
	ENSMUSG00000020432	Tcn2	11	-	3917192	3932159	protein_coding	1.63379	1.77626	1.62079	0.041778	0	0.032817	48.3851	4.54844e-41	8.70611e-39
	ENSMUSG00000031558	Slit2	5	+	47983138	48307733	protein_coding	0.424407	0.296051	0.292953	0	0	0	34.7804	5.45879e-41	1.03585e-38
	ENSMUSG00000030137	Tuba8	6	+	121210696	121226854	protein_coding	1.42711	1.63247	1.78114	0	0.048466	0.029394	45.1578	6.77669e-41	1.27495e-38
	ENSMUSG00000018819	Lsp1	7	+	142460809	142494867	protein_coding	3.48103	3.25468	4.00988	0.49038	0.278022	0.145557	11.4153	9.23495e-41	1.72271e-38
	ENSMUSG00000005667	Mthfd2	6	-	83305691	83325908	protein_coding	22.5082	25.0638	22.2943	57.3276	58.8249	57.214	0.403101	1.08165e-40	2.00077e-38
	ENSMUSG00000036667	Tcaf1	6	-	42668002	42710088	protein_coding	21.2138	21.3888	21.1945	8.62719	7.86272	9.31413	2.47066	1.49651e-40	2.7451e-38
	ENSMUSG00000028186	Uox	3	+	146570426	146632305	protein_coding	1.24978	2.27227	1.55552	0.047764	0.034487	0.183239	17.2851	1.81528e-40	3.30231e-38
	ENSMUSG00000022297	Fzd6	15	+	39006034	39038188	protein_coding	19.7723	22.9157	22.5446	47.4523	48.5326	54.3626	0.433992	6.01865e-40	1.08592e-37
	ENSMUSG00000002799	Jag2	12	-	112907819	112929776	protein_coding	13.3576	12.968	13.5916	5.19708	4.77682	4.88932	2.68224	7.48776e-40	1.34001e-37
	ENSMUSG00000053398	Phgdh	3	-	98313170	98339990	protein_coding	119.523	121.057	116.735	249.639	262.383	253.482	0.466792	8.68258e-40	1.5413e-37
	ENSMUSG00000027775	Mfsd1	3	+	67582741	67604237	protein_coding	13.927	12.1123	12.9566	31.2669	33.6833	34.5603	0.392061	9.65178e-40	1.69964e-37
	ENSMUSG00000030761	Myo7a	7	-	98051060	98119524	protein_coding	3.42177	3.90069	3.74352	9.79568	8.80556	8.2093	0.413404	1.08644e-39	1.888e-37
	ENSMUSG00000029802	Abcg2	6	+	58584523	58695676	protein_coding	14.3188	12.5681	14.6387	1.55559	2.02564	2.36493	6.95356	1.0893e-39	1.888e-37
	ENSMUSG00000030600	Lrfn1	7	+	28451980	28468242	protein_coding	1.66408	1.52102	1.39	0.089676	0.017921	0.021738	28.902	1.19916e-39	2.06219e-37
	ENSMUSG00000027376	Prom2	2	-	127526473	127541467	protein_coding	5.80045	4.99324	5.55843	15.3084	15.4243	15.2425	0.356093	2.07454e-39	3.53991e-37
	ENSMUSG00000039116	Adgrg6	10	-	14402583	14545659	protein_coding	27.9178	27.7731	27.4327	12.0784	11.5024	11.8742	2.34335	2.13886e-39	3.62159e-37
	ENSMUSG00000042284	Itga1	13	-	114953096	115101964	protein_coding	0.579684	0.6538	0.672432	0.064596	0.064954	0.060359	8.80326	6.70917e-39	1.12735e-36
	ENSMUSG00000069255	Dusp22	13	+	30659999	30711231	protein_coding	5.81079	4.76242	4.33476	0.505289	0.561467	0.730257	8.17617	1.12457e-38	1.8753e-36
	ENSMUSG00000028463	Car9	4	+	43506966	43513729	protein_coding	67.3538	64.3739	69.7612	23.1295	28.5265	23.4787	2.68103	1.65855e-38	2.74496e-36
	ENSMUSG00000045007	Tubg2	11	+	101155907	101161787	protein_coding	6.57276	5.6014	6.28878	0.735318	0.912415	0.898687	7.17777	2.61253e-38	4.29157e-36
	ENSMUSG00000040010	Slc7a5	8	-	121881150	121907694	protein_coding	68.5157	70.6344	67.259	153.299	155.196	138.982	0.461309	3.38821e-38	5.48392e-36
	ENSMUSG00000034993	Vat1	11	-	101458745	101466230	protein_coding	133.751	127.438	129.743	60.765	57.5946	55.7477	2.24514	4.58443e-38	7.36588e-36
	ENSMUSG00000048489	Depp1	6	+	116650609	116652794	protein_coding	3.47497	2.73765	3.15908	0.041861	0.122865	0	48.2817	6.45321e-38	1.02933e-35
	ENSMUSG00000030123	Plxnd1	6	-	115954811	115995005	protein_coding	5.4402	5.05703	5.04265	1.57078	1.47696	1.52761	3.38082	8.50925e-38	1.34752e-35
	ENSMUSG00000035818	Plekhs1	19	+	56461640	56486752	protein_coding	6.01377	5.00078	5.61094	1.0045	0.929249	1.08488	5.46327	1.04727e-37	1.6466e-35
	ENSMUSG00000050148	Ubqln2	X	+	153498227	153501570	protein_coding	5.43784	3.94743	4.77252	0.643228	0.732713	0.756901	6.55979	1.31381e-37	2.05103e-35
	ENSMUSG00000050578	Mmp13	9	+	7272514	7283331	protein_coding	5.76475	7.09552	6.17845	0.692135	0.818922	1.08253	7.26819	2.2792e-37	3.53309e-35
	ENSMUSG00000026417	Pigr	1	+	130826684	130852249	protein_coding	1.7013	2.02608	1.4154	0.131307	0.092419	0.138259	13.1964	4.04876e-37	6.23225e-35
	ENSMUSG00000056091	St3gal5	6	+	72097592	72154571	protein_coding	6.35399	6.29943	5.34992	1.0658	0.825941	1.03729	6.09434	4.78689e-37	7.31729e-35
	ENSMUSG00000030107	Usp18	6	+	121245906	121270917	protein_coding	4.3826	4.65088	4.12431	0.339447	0.561226	0.29345	10.7733	4.97833e-37	7.55745e-35
	ENSMUSG00000042607	Asb4	6	+	5383386	5433022	protein_coding	0.09872	0.11824	0.059115	1.43513	1.56819	2.00241	0.0607807	6.29467e-37	9.49029e-35
	ENSMUSG00000038393	Txnip	3	+	96557957	96561883	protein_coding	99.4369	131.156	103.786	38.3216	40.8673	41.883	2.76138	1.44079e-36	2.15745e-34
	ENSMUSG00000024338	Psmb8	17	+	34197721	34201454	protein_coding	17.6298	14.4855	18.1167	3.33634	3.99352	3.07257	4.81786	4.50014e-36	6.69305e-34
	ENSMUSG00000034768	Asb16	11	+	102268743	102279462	protein_coding	0.082588	0.094756	0.027162	1.74777	1.44398	1.80358	0.0466648	4.81528e-36	7.11369e-34
	ENSMUSG00000029752	Asns	6	-	7675169	7693254	protein_coding	50.5717	45.3387	47.0757	126.754	126.926	102.464	0.401534	5.10393e-36	7.48984e-34
	ENSMUSG00000029446	Psph	5	-	129765558	129787449	protein_coding	15.2355	17.7331	17.3576	41.6363	37.9466	34.8974	0.439753	7.71804e-36	1.1251e-33
	ENSMUSG00000062901	Klhl24	16	+	20097542	20129221	protein_coding	14.2741	12.1818	14.083	4.52086	6.15177	6.47924	2.36115	1.21614e-35	1.76116e-33
	ENSMUSG00000044041	Krt13	11	-	100117327	100121566	protein_coding	3.57387	2.8906	2.94935	0.194639	0.373185	0.19694	11.8825	1.27709e-35	1.83734e-33
	ENSMUSG00000025329	Padi1	4	-	140812983	140845778	protein_coding	13.5056	12.808	13.0221	5.12653	4.6907	4.59685	2.72539	2.34171e-35	3.34712e-33
	ENSMUSG00000003309	Ap1m2	9	-	21294275	21312337	protein_coding	8.88246	8.0277	9.63886	1.06295	1.40646	1.50842	6.63177	2.47454e-35	3.51416e-33
	ENSMUSG00000020644	Id2	12	-	25093799	25097140	protein_coding	18.6892	18.5761	17.9848	4.47853	4.47086	5.02649	3.94692	2.70349e-35	3.81469e-33
	ENSMUSG00000028976	Slc2a5	4	+	150119283	150144169	protein_coding	1.55944	1.53211	1.78237	0.091238	0.084683	0.235286	11.1148	3.25811e-35	4.568e-33
	ENSMUSG00000042066	Tmcc2	1	-	132356315	132391281	protein_coding	2.24934	2.77625	2.29365	0.249102	0.152361	0.255896	10.692	3.34409e-35	4.65887e-33
	ENSMUSG00000027978	Prss12	3	+	123446913	123506597	protein_coding	16.5762	16.7181	16.5883	6.15106	5.8515	5.45111	2.85481	4.17607e-35	5.78136e-33
	ENSMUSG00000021136	Smoc1	12	+	81026808	81186414	protein_coding	3.02115	2.94164	2.8728	0.22045	0.094117	0.254333	14.8031	5.12552e-35	7.05143e-33
	ENSMUSG00000026249	Serpine2	1	-	79794197	79861180	protein_coding	2.67934	3.02171	2.48568	0.050386	0.140609	0.014367	34.911	1.02193e-34	1.39719e-32
	ENSMUSG00000042429	Adora1	1	-	134199223	134235431	protein_coding	0.725626	0.558977	0.530658	0.011132	0.015128	0	32.7988	2.64984e-34	3.60051e-32
	ENSMUSG00000113113	Gm2614	12	-	100744533	100744935	processed_pseudogene	0.058064	0	0.213337	7.17847	8.85221	5.65972	0.0138764	3.98654e-34	5.38354e-32
	ENSMUSG00000026674	Ddr2	1	-	169972307	170110762	protein_coding	18.769	18.8159	18.9012	40.9291	39.4504	44.3711	0.452924	4.38434e-34	5.88464e-32
	ENSMUSG00000031523	Dlc1	8	-	36567751	36953143	protein_coding	1.3224	1.23164	1.39318	0.314168	0.086026	0.104382	7.43995	5.53037e-34	7.37785e-32
	ENSMUSG00000004951	Hspb1	5	+	135887919	135889563	protein_coding	3.36558	3.32238	3.91593	0.181416	0.180425	0.218701	17.4171	6.39218e-34	8.47619e-32
	ENSMUSG00000034282	Evpl	11	-	116220559	116238077	protein_coding	6.92606	6.56868	6.56186	2.48442	2.17296	2.30673	2.87193	6.82289e-34	8.99314e-32
	ENSMUSG00000072945	Ripply1	X	-	139779549	139782353	protein_coding	5.79695	3.9261	4.14501	0.242709	0.190931	0.183928	21.4619	1.01193e-33	1.32586e-31
	ENSMUSG00000018916	Csf2	11	-	54247271	54249667	protein_coding	5.11892	4.71723	4.48485	0.337669	0.41129	0.249449	13.9546	1.02206e-33	1.33122e-31
	ENSMUSG00000017740	Slc12a5	2	+	164960802	164999731	protein_coding	4.08256	4.34273	4.01961	1.26614	1.00943	0.701015	4.14919	2.0747e-33	2.68637e-31
	ENSMUSG00000003849	Nqo1	8	-	107388225	107403206	protein_coding	0.179907	0.337786	0.301598	4.15522	3.39932	3.13167	0.0792529	2.45559e-33	3.16096e-31
	ENSMUSG00000020882	Cacnb1	11	-	98001508	98023034	protein_coding	1.36567	0.771431	1.58878	0.045037	0.030843	0.037413	26.2112	6.03292e-33	7.72074e-31
	ENSMUSG00000022325	Pop1	15	+	34495304	34530648	protein_coding	9.02614	8.2766	8.36536	19.6844	19.5064	20.7166	0.428749	7.799e-33	9.92322e-31
	ENSMUSG00000031370	Zrsr2	X	-	163935443	163958661	protein_coding	8.64824	7.12029	8.84423	18.3605	19.9267	19.6124	0.425392	1.43365e-32	1.81365e-30
	ENSMUSG00000021242	Npc2	12	-	84754562	84773152	protein_coding	120.661	114.842	122.361	58.6296	57.5519	56.7336	2.06941	1.58034e-32	1.9878e-30
	ENSMUSG00000031373	Car5b	X	-	163976822	164027997	protein_coding	6.34012	6.09364	6.52978	15.8664	15.2279	14.8638	0.41301	1.89473e-32	2.36971e-30
	ENSMUSG00000020689	Itgb3	11	+	104608000	104670476	protein_coding	4.47908	3.60588	2.26233	0.337251	0.428609	0.380259	8.82333	2.23561e-32	2.78024e-30
	ENSMUSG00000022285	Ywhaz	15	-	36770770	36796929	protein_coding	340.742	340.802	331.685	658.014	649.662	696.234	0.505633	2.28923e-32	2.83092e-30
	ENSMUSG00000035413	Tmem98	11	+	80810175	80822033	protein_coding	3.09867	3.3222	2.97376	0.309722	0.234735	0.122204	13.5283	2.37699e-32	2.92304e-30
	ENSMUSG00000024087	Cyp1b1	17	-	79701537	79715061	protein_coding	4.63541	4.3093	4.46768	1.23789	1.0485	1.21216	3.80961	2.48132e-32	3.03438e-30
	ENSMUSG00000021509	Slc25a48	13	+	56438355	56474239	protein_coding	1.20093	1.09399	0.88711	5.42138	5.17538	4.69384	0.209654	3.80931e-32	4.63263e-30
	ENSMUSG00000001020	S100a4	3	+	90603771	90606045	protein_coding	129.687	138.393	131.193	281.401	307.359	274.576	0.462496	4.06623e-32	4.91791e-30
	ENSMUSG00000041757	Plekha6	1	+	133164210	133303435	protein_coding	0.193451	0.471687	0.548408	0	0	0	41.4515	5.00963e-32	6.02579e-30
	ENSMUSG00000027752	Exosc8	3	-	54728678	54735393	protein_coding	26.5567	26.5073	22.9761	54.2604	60.1151	58.3551	0.440321	5.32321e-32	6.36818e-30
	ENSMUSG00000026556	Vangl2	1	-	172000960	172028444	protein_coding	4.30373	4.85426	5.55606	1.03496	1.37791	1.5853	3.66024	8.60774e-32	1.02418e-29
	ENSMUSG00000031825	Crispld2	8	+	119992438	120052793	protein_coding	7.68888	6.90556	6.6012	0.792664	0.94909	0.893782	7.96299	8.74608e-32	1.03505e-29
	ENSMUSG00000018906	P4ha2	11	+	54100095	54131665	protein_coding	8.61989	9.29687	9.95791	1.87922	1.98362	2.10161	4.65508	9.40272e-32	1.10681e-29
	ENSMUSG00000006378	Gcat	15	+	79030874	79038353	protein_coding	28.7554	26.5846	26.6176	55.7115	60.2847	59.1362	0.468066	1.0613e-31	1.24262e-29
	ENSMUSG00000052397	Ezr	17	-	6738041	6782784	protein_coding	269.991	263.857	265.386	130.627	132.403	135.581	2.00497	1.2067e-31	1.4054e-29
	ENSMUSG00000032667	Pon2	6	-	5264147	5298455	protein_coding	10.384	10.2879	10.349	22.4428	23.359	22.6922	0.453139	1.22211e-31	1.41584e-29
	ENSMUSG00000041540	Sox5	6	-	143828425	144781977	protein_coding	1.62642	1.12269	1.20679	0.233603	0.137781	0.118749	7.66323	1.424e-31	1.64111e-29
	ENSMUSG00000024664	Fads3	19	+	10041569	10060110	protein_coding	12.1212	11.2864	9.699	24.7463	25.5588	23.0093	0.451795	1.91582e-31	2.19641e-29
	ENSMUSG00000070469	Adamtsl3	7	+	82335694	82614450	protein_coding	3.46812	3.7018	3.78962	1.13257	1.0142	1.55237	2.94694	3.2381e-31	3.69311e-29
	ENSMUSG00000015222	Map2	1	+	66175273	66442583	protein_coding	17.2332	16.4446	18.2133	6.86045	7.58418	7.04148	2.41313	3.30152e-31	3.74604e-29
	ENSMUSG00000031790	Mmp15	8	+	95352268	95375080	protein_coding	10.4721	9.37909	10.3047	4.02527	3.76557	3.57891	2.64794	3.54053e-31	3.99662e-29
	ENSMUSG00000045092	S1pr1	3	-	115710433	115715072	protein_coding	0.660594	0.585278	1.00416	0	0.016983	0	48.5289	4.02851e-31	4.52426e-29
	ENSMUSG00000008496	Pou2f2	7	-	25087344	25179726	protein_coding	2.38463	2.96876	2.79924	0.29564	0.288905	0.284847	9.09796	5.25403e-31	5.87065e-29
	ENSMUSG00000108218	Olfr1372-ps1	11	-	52154722	52168159	transcribed_unprocessed_pseudogene	2.60604	2.67574	2.52453	0.230173	0.379139	0.227721	9.03808	6.14905e-31	6.83601e-29
	ENSMUSG00000022142	Nup155	15	+	8109273	8161247	protein_coding	17.8545	18.611	19.018	34.0766	35.0362	36.561	0.52518	6.75731e-31	7.47446e-29
	ENSMUSG00000004267	Eno2	6	-	124760053	124769673	protein_coding	3.02209	3.63572	4.09189	0.365091	0.611759	0.547322	6.93598	7.69287e-31	8.46677e-29
	ENSMUSG00000035273	Hpse	5	-	100679484	100719716	protein_coding	1.05846	1.3761	1.33294	0.090213	0.087733	0.042682	15.1519	8.92664e-31	9.77578e-29
	ENSMUSG00000028211	Trp53inp1	4	+	11156431	11174379	protein_coding	3.4422	3.7212	3.95158	0.994898	0.875169	0.921176	3.95038	1.77732e-30	1.93675e-28
	ENSMUSG00000006356	Crip2	12	+	113140236	113145506	protein_coding	4.05954	4.81707	4.06382	0.555088	0.703813	0.592376	6.89448	2.40371e-30	2.60643e-28
	ENSMUSG00000032446	Eomes	9	+	118478212	118486132	protein_coding	3.03999	3.09547	2.87548	0.41087	0.517029	0.472296	6.32147	3.61244e-30	3.8979e-28
	ENSMUSG00000072621	Slfn10-ps	11	-	83028130	83040042	transcribed_unprocessed_pseudogene	2.80939	3.07277	2.77931	0.377169	0.449799	0.302686	7.49488	4.06169e-30	4.36127e-28
	ENSMUSG00000024587	Nars	18	-	64499647	64516652	protein_coding	78.2505	78.831	76.5011	154.866	152.725	152.773	0.507419	5.844e-30	6.24457e-28
	ENSMUSG00000053279	Aldh1a1	19	+	20492715	20643465	protein_coding	1.31207	1.24354	1.61406	0.076957	0.058141	0.056138	18.9828	6.31701e-30	6.70007e-28
	ENSMUSG00000041120	Nbl1	4	-	139082284	139092993	protein_coding	9.61365	8.30717	8.7097	2.02477	2.02798	1.57686	4.71066	6.33116e-30	6.70007e-28
	ENSMUSG00000002885	Adgre5	8	-	83723251	83741326	protein_coding	4.01613	3.159	3.81828	0.630277	0.439834	0.365654	7.52058	8.80271e-30	9.27106e-28
	ENSMUSG00000038766	Gabpb2	3	-	95181766	95217916	protein_coding	9.27288	10.0829	11.2608	21.1481	22.0573	22.9411	0.463104	9.26111e-30	9.70741e-28
	ENSMUSG00000037894	H2afz	3	+	137864487	137866922	protein_coding	175.73	165.939	166.848	334.815	330.698	321.74	0.515097	9.92145e-30	1.03503e-27
	ENSMUSG00000028464	Tpm2	4	-	43514711	43523765	protein_coding	9.68111	7.37499	7.98748	1.521	2.07932	1.99247	4.45928	1.02798e-29	1.06736e-27
	ENSMUSG00000052837	Junb	8	-	84974484	84978718	protein_coding	296.637	290.57	280.308	135.002	149.335	123.661	2.12619	1.17601e-29	1.21532e-27
	ENSMUSG00000032702	Kank1	19	+	25236975	25434496	protein_coding	12.4593	12.0699	12.3047	5.46783	6.17665	5.94009	2.09281	1.46328e-29	1.50512e-27
	ENSMUSG00000041449	Serpina3h	12	+	104247905	104253669	transcribed_unprocessed_pseudogene	0.517829	0.450654	0.551017	8.6534	8.67534	4.19385	0.0718939	1.48565e-29	1.52103e-27
	ENSMUSG00000026825	Dnm1	2	-	32308471	32353338	protein_coding	5.89263	5.27558	5.56668	1.50002	1.62206	1.35854	3.71676	1.55752e-29	1.58723e-27
	ENSMUSG00000025650	Col7a1	9	+	108953586	108984875	protein_coding	17.1478	17.5834	19.1522	8.87039	8.49821	8.48107	2.08323	1.82627e-29	1.85253e-27
	ENSMUSG00000043487	Acot6	12	+	84100654	84111349	protein_coding	0	0	0	0.336992	0.413581	0.378046	0.0258929	1.85802e-29	1.87609e-27
	ENSMUSG00000031906	Smpd3	8	-	106252548	106337988	protein_coding	1.04314	1.05551	0.630144	0.043698	0.06426	0.068004	13.3947	2.13857e-29	2.14951e-27
	ENSMUSG00000025743	Sdc3	4	+	130792537	130826319	protein_coding	10.9637	10.0682	11.2204	4.6424	4.07013	4.58672	2.42191	2.27104e-29	2.27228e-27
	ENSMUSG00000022306	Zfpm2	15	+	40655035	41104592	protein_coding	0.340972	0.324704	0.427567	2.10528	1.74246	2.29984	0.181826	2.3025e-29	2.29333e-27
	ENSMUSG00000039801	Cplane1	15	+	8169106	8271158	protein_coding	12.0231	12.3407	12.6461	24.4641	23.8583	23.0854	0.518492	2.35373e-29	2.33379e-27
	ENSMUSG00000053797	Krt16	11	-	100246091	100248902	protein_coding	13.0226	13.0461	12.7456	3.64266	3.86639	3.44203	3.53738	2.60091e-29	2.56732e-27
	ENSMUSG00000027715	Ccna2	3	-	36564865	36572150	protein_coding	74.2308	85.5793	75.5342	156.967	180.403	162.147	0.471175	2.70415e-29	2.65731e-27
	ENSMUSG00000025007	Aldh18a1	19	-	40550257	40588463	protein_coding	39.3943	39.3272	37.8848	78.1725	76.1314	74.34	0.510055	2.82195e-29	2.76074e-27
	ENSMUSG00000026483	Fam129a	1	+	151571186	151721939	protein_coding	4.1222	4.29165	4.29849	1.30706	1.26671	1.27062	3.28886	3.27853e-29	3.19323e-27
	ENSMUSG00000022876	Samsn1	16	-	75858793	76022281	protein_coding	0.630793	0.725069	0.95914	0	0	0	78.1667	3.44661e-29	3.34215e-27
	ENSMUSG00000057092	Fxyd3	7	-	31068172	31076704	protein_coding	1.67071	2.30343	1.28561	0.115095	0.265887	0.10932	10.1667	3.69413e-29	3.56646e-27
	ENSMUSG00000034403	Pja1	X	-	99465734	99471273	protein_coding	23.9177	23.3463	24.7366	11.5807	11.2116	11.5588	2.09506	4.58256e-29	4.40487e-27
	ENSMUSG00000034714	Ttyh2	11	+	114675431	114720977	protein_coding	4.07984	4.32606	4.10839	0.921972	0.807063	0.570352	5.38523	4.99245e-29	4.77799e-27
	ENSMUSG00000037295	Ldlrap1	4	-	134741554	134768024	protein_coding	18.9464	18.7279	18.779	9.44843	8.94546	8.73114	2.08003	5.46096e-29	5.20375e-27
	ENSMUSG00000005397	Nid1	13	+	13437551	13512269	protein_coding	1.49589	1.27847	1.67968	0.1515	0.256438	0.317362	5.93677	5.58534e-29	5.29933e-27
	ENSMUSG00000041633	Kctd12b	X	-	153685154	153696391	protein_coding	2.55526	2.65645	2.27773	0.541872	0.410534	0.481947	5.13499	5.92115e-29	5.59383e-27
	ENSMUSG00000029161	Cgref1	5	-	30933143	30945591	protein_coding	1.0719	1.00662	1.07027	5.69013	5.79707	5.19966	0.190155	6.95129e-29	6.53896e-27
	ENSMUSG00000015312	Gadd45b	10	+	80930073	80932204	protein_coding	44.3107	43.4437	43.2837	88.3106	93.3215	87.3921	0.487144	1.08149e-28	1.01301e-26
	ENSMUSG00000049036	Tmem121	12	+	113185930	113189523	protein_coding	0.373057	0.170939	0.217519	3.07576	3.23806	2.85477	0.0860474	1.09144e-28	1.018e-26
	ENSMUSG00000027823	Gmps	3	+	63976106	64022579	protein_coding	13.8727	15.416	14.7198	28.6355	28.4339	30.3459	0.503612	1.12226e-28	1.04233e-26
	ENSMUSG00000027774	Gfm1	3	+	67430096	67476529	protein_coding	12.4069	12.9174	13.2072	25.5291	26.8493	28.289	0.477853	1.22153e-28	1.12976e-26
	ENSMUSG00000021223	Papln	12	+	83763634	83792382	protein_coding	1.19142	1.17391	1.31218	0.185182	0.144807	0.129095	7.58052	1.53792e-28	1.41643e-26
	ENSMUSG00000049791	Fzd4	7	+	89404355	89413134	protein_coding	6.97094	7.54024	7.23388	3.12314	2.88885	2.62229	2.5132	1.64858e-28	1.51203e-26
	ENSMUSG00000024530	Prelid3a	18	+	67464866	67479835	protein_coding	0	0	0	1.09424	1.02137	0.719672	0.0104702	1.92719e-28	1.76022e-26
	ENSMUSG00000053552	Ebf4	2	+	130295169	130370481	protein_coding	0.560048	0.655875	0.351239	0	0	0	53.2387	2.11436e-28	1.92319e-26
	ENSMUSG00000034317	Trim59	3	-	69035288	69044755	protein_coding	27.1086	36.4677	27.9679	54.9143	54.1336	55.3202	0.557027	2.70038e-28	2.44612e-26
	ENSMUSG00000051379	Flrt3	2	-	140650914	140671469	protein_coding	6.63144	6.49815	6.95088	2.04288	2.11266	1.72438	3.40283	4.91471e-28	4.43371e-26
	ENSMUSG00000029561	Oasl2	5	+	114896936	114912234	protein_coding	12.9925	14.767	14.674	4.96973	4.89333	3.97664	3.0616	7.10092e-28	6.37981e-26
	ENSMUSG00000032402	Smad3	9	-	63646767	63757994	protein_coding	48.3564	49.3022	49.3013	25.9626	23.5618	25.3196	1.96316	8.29453e-28	7.42192e-26
	ENSMUSG00000035062	Zc4h2	X	-	95639193	95658509	protein_coding	0.591519	0.604846	0.46365	0	0	0	56.3338	1.23468e-27	1.10031e-25
	ENSMUSG00000006576	Slc4a3	1	+	75546266	75562172	protein_coding	1.48949	1.37206	1.60804	0.091779	0.119442	0.140998	11.7723	1.25485e-27	1.11378e-25
	ENSMUSG00000025764	Jade1	3	+	41555731	41616864	protein_coding	10.0067	8.38643	12.8591	34.0222	29.6326	29.3488	0.336247	1.5782e-27	1.39515e-25
	ENSMUSG00000027599	Armc1	3	-	19131402	19163065	protein_coding	8.74155	9.30649	9.15017	18.6655	19.2643	19.0497	0.477608	2.29783e-27	2.0232e-25
	ENSMUSG00000023411	Nfatc4	14	+	55823144	55833943	protein_coding	0.986272	0.921725	1.17363	0.052575	0.092312	0.219388	7.89202	2.38235e-27	2.08925e-25
	ENSMUSG00000034488	Edil3	13	+	88821472	89323223	protein_coding	0.240242	0.389459	0.308337	0	0	0	32.2679	2.42042e-27	2.11421e-25
	ENSMUSG00000074093	Svip	7	-	51997171	52006018	protein_coding	2.26877	2.10357	2.12327	0.38671	0.332991	0.261479	6.45346	2.45714e-27	2.13781e-25
	ENSMUSG00000091586	Cyp4f17	17	+	32506050	32530143	protein_coding	2.2114	2.38093	2.76286	0.486164	0.494986	0.474131	4.97225	2.46989e-27	2.14044e-25
	ENSMUSG00000046807	Lrrc75b	10	-	75550123	75560330	protein_coding	17.1274	10.8731	11.4343	4.91796	4.38694	4.84703	2.78275	2.49332e-27	2.15227e-25
	ENSMUSG00000004837	Grap	11	+	61653265	61672784	protein_coding	1.05305	1.31037	1.0362	5.58761	5.63036	5.72836	0.202024	2.77953e-27	2.38996e-25
	ENSMUSG00000034330	Plcg2	8	+	117498291	117635142	protein_coding	67.2364	65.026	68.1295	35.3513	33.9594	33.7103	1.94488	3.15823e-27	2.70502e-25
	ENSMUSG00000027671	Actl6a	3	+	32706298	32726973	protein_coding	21.451	21.6925	21.4795	43.6115	45.2962	48.0761	0.471872	3.51755e-27	3.0011e-25
	ENSMUSG00000046768	Rhoj	12	+	75308322	75401456	protein_coding	0	0.059091	0	1.66875	1.59834	1.45788	0.0187364	4.19543e-27	3.56563e-25
	ENSMUSG00000019960	Dusp6	10	+	99263231	99267489	protein_coding	34.026	35.7387	35.8615	16.7981	17.4461	15.1318	2.13853	7.15281e-27	6.05568e-25
	ENSMUSG00000037972	Snn	16	+	11060945	11074985	protein_coding	15.1692	15.0972	13.376	5.50002	5.27657	5.02172	2.75913	7.97364e-27	6.72475e-25
	ENSMUSG00000063273	Naa15	3	+	51415148	51476507	protein_coding	32.771	35.2781	33.0036	61.9811	62.2993	65.5896	0.532294	8.26493e-27	6.9438e-25
	ENSMUSG00000036158	Prickle1	15	-	93499114	93595891	protein_coding	2.73215	2.31575	2.28473	0.330866	0.412614	0.208623	7.4968	8.93755e-27	7.48036e-25
	ENSMUSG00000031770	Herpud1	8	+	94386438	94395377	protein_coding	20.2355	18.8397	19.4787	41.1051	40.3927	38.114	0.489661	9.20619e-27	7.67601e-25
	ENSMUSG00000029468	P2rx7	5	+	122643911	122691432	protein_coding	0.63006	0.758943	0.886435	0.033117	0.02964	0	24.8546	1.79196e-26	1.48848e-24
	ENSMUSG00000066720	Cldn9	17	-	23682584	23684026	protein_coding	21.1966	18.194	20.5087	6.83118	6.24191	6.89261	2.99711	1.79977e-26	1.48934e-24
	ENSMUSG00000042406	Atf4	15	+	80255184	80257541	protein_coding	69.2192	76.6336	76.8227	151.187	136.06	158.09	0.500049	1.8393e-26	1.51636e-24
	ENSMUSG00000059743	Fdps	3	-	89093588	89101959	protein_coding	54.568	54.6615	55.1556	104.279	108.065	101.997	0.522997	2.02304e-26	1.66161e-24
	ENSMUSG00000041688	Amot	X	-	145446425	145505181	protein_coding	9.96322	9.27679	10.5819	4.12566	4.02644	4.60377	2.33476	2.03896e-26	1.66846e-24
	ENSMUSG00000011256	Adam19	11	+	46055992	46147343	protein_coding	4.77112	5.11085	4.74453	1.77088	1.58783	1.59706	2.93967	2.10387e-26	1.7152e-24
	ENSMUSG00000054364	Rhob	12	-	8497661	8500009	protein_coding	67.8563	70.0851	71.5564	32.7464	36.2775	30.1361	2.11239	2.23554e-26	1.81582e-24
	ENSMUSG00000017897	Eya2	2	+	165595032	165771727	protein_coding	9.39115	8.51519	7.19107	2.00163	2.52582	2.14787	3.74738	2.74589e-26	2.22215e-24
	ENSMUSG00000024014	Pim1	17	+	29490753	29496112	protein_coding	60.4696	57.5606	72.752	26.7772	24.8821	28.2552	2.38681	3.20347e-26	2.58296e-24
	ENSMUSG00000011034	Slc5a1	5	+	33104219	33162870	protein_coding	1.28794	1.295	1.43341	0.205324	0.237982	0.218761	5.84676	3.53934e-26	2.84336e-24
	ENSMUSG00000092165	Gm5624	14	-	44556795	44627938	protein_coding	0.156601	0.029731	0	2.29331	2.09736	1.4553	0.0368164	3.8899e-26	3.11362e-24
	ENSMUSG00000020937	Plcd3	11	-	103070304	103101658	protein_coding	45.7293	42.7374	44.2121	21.9531	22.5808	20.4174	2.04226	5.36563e-26	4.27928e-24
	ENSMUSG00000074280	Gm6166	9	+	57483963	57484371	processed_pseudogene	33.2905	36.2508	29.4058	83.402	89.6463	85.4462	0.382854	6.70967e-26	5.33189e-24
	ENSMUSG00000054146	Krt15	11	-	100131758	100135928	protein_coding	2.6781	2.53757	2.78888	0	0.112903	0	56.2238	6.9189e-26	5.47838e-24
	ENSMUSG00000032776	Mctp2	7	-	72077830	72306608	protein_coding	1.30248	1.39889	1.54586	0.297202	0.276505	0.30147	4.7253	7.06037e-26	5.57035e-24
	ENSMUSG00000079014	Serpina3i	12	+	104263122	104269372	protein_coding	0.051908	0.074223	0.075993	1.06113	0.892458	1.36921	0.0692329	7.79689e-26	6.12947e-24
	ENSMUSG00000059327	Eda	X	+	99975606	100400762	protein_coding	0	0	0.011091	0.255635	0.285992	0.395616	0.0424826	7.93456e-26	6.19605e-24
	ENSMUSG00000039109	F13a1	13	-	36867178	37050244	protein_coding	0.282881	0.447976	0.267473	0	0	0	34.2777	7.93788e-26	6.19605e-24
	ENSMUSG00000049709	Nlrp10	7	-	108921852	108930178	protein_coding	0.895679	0.72132	0.718763	0.074919	0.036527	0.07099	11.1364	8.34344e-26	6.4896e-24
	ENSMUSG00000038775	Vill	9	+	119052778	119071525	protein_coding	1.48465	1.20051	1.17684	0.062106	0.108403	0.017052	17.8892	8.89995e-26	6.87885e-24
	ENSMUSG00000053007	Creb5	6	+	53287270	53700376	protein_coding	6.58167	5.847	6.2655	2.52106	2.54409	2.77585	2.37888	8.90638e-26	6.87885e-24
	ENSMUSG00000063229	Ldha	7	+	46841475	46855627	protein_coding	459.559	442.806	461.788	814.138	820.082	849.617	0.549217	1.20196e-25	9.25092e-24
	ENSMUSG00000037111	Setd7	3	-	51515319	51560879	protein_coding	23.2887	23.8454	24.0257	42.1781	43.7725	44.087	0.547329	1.44914e-25	1.11144e-23
	ENSMUSG00000042628	Zfyve1	12	-	83546558	83597222	protein_coding	15.0847	14.9114	15.1894	7.11724	7.01299	6.78446	2.1588	1.46106e-25	1.1167e-23
	ENSMUSG00000045180	Shroom2	X	-	152609509	152769465	protein_coding	3.16498	3.45551	3.25423	7.64047	7.11606	6.83494	0.458097	1.467e-25	1.11735e-23
	ENSMUSG00000031548	Sfrp1	8	+	23411502	23449632	protein_coding	7.05214	6.96965	7.17385	2.58084	2.68198	2.74919	2.63935	1.49524e-25	1.13493e-23
	ENSMUSG00000045629	Sh3tc2	18	+	61953075	62024402	protein_coding	0.291131	0.212403	0.210063	1.58264	1.65285	1.48856	0.156413	1.6739e-25	1.26618e-23
	ENSMUSG00000027339	Rassf2	2	-	131989415	132030258	protein_coding	0.252299	0.17984	0.303024	0.006831	0.006661	0	17.5932	1.73817e-25	1.31029e-23
	ENSMUSG00000044433	Camsap3	8	+	3587293	3609075	protein_coding	12.0001	10.7016	11.6345	4.98547	4.33103	4.14874	2.54654	1.8694e-25	1.40441e-23
	ENSMUSG00000032009	Sesn3	9	+	14275067	14333101	protein_coding	25.3334	25.5511	26.5217	13.6964	13.2219	13.783	1.90115	1.99115e-25	1.49079e-23
	ENSMUSG00000020653	Klf11	12	+	24651274	24662789	protein_coding	7.48095	6.06827	6.5021	2.30154	2.04498	1.99028	3.15407	2.67373e-25	1.99505e-23
	ENSMUSG00000031486	Adgra2	8	+	27085583	27123436	protein_coding	1.0655	1.01806	1.10698	0.162826	0.124276	0.169145	6.62326	4.19988e-25	3.12324e-23
	ENSMUSG00000025403	Shmt2	10	-	127517123	127522444	protein_coding	91.4894	96.7513	89.6852	173.304	172.28	165.273	0.544065	6.65861e-25	4.935e-23
	ENSMUSG00000022234	Cct5	15	-	31590800	31601804	protein_coding	246.318	241.69	235.868	423.537	425.134	454.223	0.555601	1.03921e-24	7.67621e-23
	ENSMUSG00000020034	Tcp11l2	10	+	84576626	84614359	protein_coding	3.52741	3.93927	3.5499	0.664651	0.835734	0.842545	4.65525	1.05474e-24	7.76483e-23
	ENSMUSG00000028539	Artn	4	-	117926162	117929763	protein_coding	4.72391	5.4706	5.35461	14.7814	13.5495	11.6565	0.389309	1.09373e-24	8.02504e-23
	ENSMUSG00000039081	Zfp503	14	-	21983959	21989601	protein_coding	5.6771	5.97727	5.82042	12.604	12.8926	11.6876	0.470379	1.23884e-24	9.05957e-23
	ENSMUSG00000026979	Psd4	2	+	24367580	24414954	protein_coding	0.126581	0.098149	0.141495	1.94288	2.00689	1.51587	0.0720981	1.3572e-24	9.89226e-23
	ENSMUSG00000055322	Tns1	1	-	73910231	74124449	protein_coding	0.35543	0.427241	0.366449	1.74929	1.9842	1.61734	0.219133	1.47712e-24	1.07308e-22
	ENSMUSG00000038550	Ciart	3	-	95878503	95882251	protein_coding	0.981108	1.08087	0.91986	5.0097	6.13667	4.81241	0.188372	1.81298e-24	1.31274e-22
	ENSMUSG00000059401	Mamld1	X	+	71050256	71156056	protein_coding	2.39215	2.23493	2.34824	0.128832	0.219806	0.312829	10.1311	1.84869e-24	1.33421e-22
	ENSMUSG00000038879	Nipal2	15	-	34572799	34679212	protein_coding	2.51802	2.64386	2.69826	7.06856	5.97224	7.38832	0.385654	1.94434e-24	1.39865e-22
	ENSMUSG00000031960	Aars	8	+	111033144	111057664	protein_coding	52.8554	56.1901	51.7393	95.6521	100.08	92.6608	0.557566	2.00619e-24	1.43844e-22
	ENSMUSG00000017830	Dhx58	11	-	100694884	100704271	protein_coding	5.49331	5.93725	5.35776	1.50659	1.82981	1.15504	3.71968	2.15251e-24	1.53835e-22
	ENSMUSG00000022296	Baalc	15	+	38933144	38952912	protein_coding	1.07401	0.684337	1.08796	4.65336	4.99204	4.55988	0.202055	2.56016e-24	1.82376e-22
	ENSMUSG00000035547	Capn5	7	-	98121559	98178274	protein_coding	32.1933	29.7945	30.9709	17.4222	17.4701	14.9956	1.86283	2.62765e-24	1.8658e-22
	ENSMUSG00000001995	Sipa1l2	8	-	125418063	125569808	protein_coding	1.82177	1.66575	1.73843	5.30033	4.5953	4.24655	0.370864	2.77856e-24	1.96661e-22
	ENSMUSG00000020889	Nr1d1	11	-	98767932	98775333	protein_coding	13.3038	12.8259	12.4409	5.13772	5.52888	5.01841	2.45629	2.94942e-24	2.08085e-22
	ENSMUSG00000053550	Shisa7	7	-	4825552	4844696	protein_coding	1.01274	1.25602	0.972769	0.166345	0.084948	0.022151	10.7813	3.66729e-24	2.57905e-22
	ENSMUSG00000062397	Zfp706	15	-	36997027	37007773	protein_coding	28.6833	28.6984	27.6081	50.9891	51.5652	50.9944	0.553591	3.79711e-24	2.66185e-22
	ENSMUSG00000026768	Itga8	2	-	12106632	12301922	protein_coding	0.409997	0.4563	0.319239	0.018385	0.018871	0	18.0733	4.05702e-24	2.83502e-22
	ENSMUSG00000028599	Tnfrsf1b	4	-	145213463	145246870	protein_coding	38.2351	36.6565	40.3794	19.417	20.1988	18.6779	1.97692	4.45601e-24	3.10398e-22
	ENSMUSG00000020135	Apc2	10	+	80295977	80318263	protein_coding	1.70598	1.78621	2.21746	0.510715	0.484738	0.351905	4.16714	5.16679e-24	3.58774e-22
	ENSMUSG00000031167	Rbm3	X	-	8138975	8145880	protein_coding	124.523	124.767	121.274	215.989	236.671	235.304	0.538659	5.49739e-24	3.8053e-22
	ENSMUSG00000006931	P3h4	11	-	100408456	100414836	protein_coding	3.0343	3.06475	2.17616	0.201149	0.138482	0.030542	20.754	5.90806e-24	4.07674e-22
	ENSMUSG00000028497	Hacd4	4	-	88396144	88438928	protein_coding	3.20448	3.33259	3.15404	7.30465	7.69901	7.67071	0.42816	6.02397e-24	4.14374e-22
	ENSMUSG00000030465	Psd3	8	-	67689082	68212027	protein_coding	2.05944	1.65677	1.7665	0.128526	0.053293	0.029384	22.8551	6.06677e-24	4.16018e-22
	ENSMUSG00000074151	Nlrc5	8	+	94434356	94527272	protein_coding	4.47701	4.45108	4.87729	2.08067	1.72859	1.67932	2.50705	6.80952e-24	4.655e-22
	ENSMUSG00000027931	Npr1	3	-	90450591	90465866	protein_coding	0.734288	0.599694	0.761966	0.027663	0.053948	0.016142	16.6411	8.05269e-24	5.48779e-22
	ENSMUSG00000001467	Cyp51	5	-	4081145	4104746	protein_coding	14.6593	16.0044	15.2333	28.2439	29.687	32.9573	0.505146	8.29574e-24	5.63598e-22
	ENSMUSG00000032198	Dock6	9	-	21799860	21852635	protein_coding	4.26755	5.19148	4.77332	2.31341	1.36788	1.62522	2.6726	1.11249e-23	7.53481e-22
	ENSMUSG00000019818	Cd164	10	+	41519414	41531048	protein_coding	214.018	218.703	219.001	115.714	119.982	121.221	1.82591	1.11682e-23	7.54096e-22
	ENSMUSG00000039621	Prex1	2	-	166566342	166713832	protein_coding	1.50019	0.753239	1.01824	0.124536	0.145167	0.10681	8.12193	1.13765e-23	7.6581e-22
	ENSMUSG00000045394	Epcam	17	+	87635979	87651129	protein_coding	224.414	234.276	229.979	126.122	140.551	103.998	1.85783	1.67209e-23	1.12214e-21
	ENSMUSG00000029287	Tgfbr3	5	-	107106570	107289629	protein_coding	1.15153	0.903565	1.12261	0.116383	0.148371	0.293284	5.45493	1.80326e-23	1.20648e-21
	ENSMUSG00000006494	Pdk1	2	+	71873224	71903858	protein_coding	13.3819	11.7121	13.024	25.0484	25.1271	24.361	0.511597	1.97282e-23	1.31593e-21
	ENSMUSG00000027828	Ssr3	3	-	65379655	65392623	protein_coding	112.969	118.905	119.924	201.519	205.317	212.807	0.567764	2.0999e-23	1.39646e-21
	ENSMUSG00000042129	Rassf4	6	-	116633008	116673952	protein_coding	0.262824	0.364575	0.332463	0.008706	0.016978	0.010194	15.0257	2.15949e-23	1.43177e-21
	ENSMUSG00000001415	Smg5	3	+	88336260	88362338	protein_coding	30.4732	32.0174	30.0637	55.8489	53.7009	54.4078	0.564581	2.18659e-23	1.44538e-21
	ENSMUSG00000027770	Dhx36	3	-	62468013	62507004	protein_coding	12.0767	12.6417	12.0645	22.3231	21.8222	23.607	0.543105	2.40768e-23	1.58676e-21
	ENSMUSG00000049804	Armcx4	X	+	134686519	134696757	protein_coding	1.94269	2.47579	2.26024	0.601247	0.679151	0.636931	3.44509	2.67422e-23	1.75716e-21
	ENSMUSG00000027499	Pkia	3	+	7366669	7445366	protein_coding	5.03378	5.08328	4.21434	12.2362	11.9591	11.4273	0.402815	2.77769e-23	1.81972e-21
	ENSMUSG00000026255	Efhd1	1	+	87264363	87310839	protein_coding	0.937311	0.704094	1.18234	0.045501	0	0	37.7974	4.48403e-23	2.92886e-21
	ENSMUSG00000031748	Gnao1	8	+	93809966	93969388	protein_coding	0.937582	0.718707	0.691498	0.079778	0.049619	0.065003	10.5962	4.70259e-23	3.06252e-21
	ENSMUSG00000027333	Smox	2	+	131491496	131525922	protein_coding	44.1386	37.5091	41.6622	16.8375	20.109	14.6876	2.38734	7.12396e-23	4.62574e-21
	ENSMUSG00000031785	Adgrg1	8	+	94974751	95014217	protein_coding	3.54465	3.30802	4.03684	0.888093	0.803491	0.605493	4.69237	7.50982e-23	4.86194e-21
	ENSMUSG00000034926	Dhcr24	4	+	106561038	106589113	protein_coding	37.1961	38.4616	36.1076	67.0474	65.2296	69.0233	0.555283	7.62935e-23	4.92485e-21
	ENSMUSG00000021567	Nkd2	13	-	73818534	73847631	protein_coding	0.10453	0.017937	0.10619	1.18509	1.49415	1.02166	0.0693283	8.34581e-23	5.37158e-21
	ENSMUSG00000022510	Trp63	16	+	25683763	25892102	protein_coding	1.83226	1.61212	1.53133	0.210274	0.153655	0.092352	10.2939	8.71634e-23	5.59371e-21
	ENSMUSG00000026321	Tnfrsf11a	1	+	105780718	105847981	protein_coding	1.7189	1.60053	2.11854	0.255035	0.300789	0.352217	5.82914	1.06924e-22	6.84191e-21
	ENSMUSG00000027601	Mtfr1	3	+	19187327	19220817	protein_coding	21.8505	24.3944	23.0674	56.2549	43.1842	44.302	0.48231	1.17573e-22	7.49359e-21
	ENSMUSG00000003526	Prodh	16	-	18060357	18090203	protein_coding	4.22865	4.19714	3.69103	9.65589	12.3147	12.6959	0.350088	1.1779e-22	7.49359e-21
	ENSMUSG00000034586	Hid1	11	-	115347707	115367756	protein_coding	2.82507	2.63194	2.89235	0.650207	0.519246	0.703283	4.40385	1.19115e-22	7.54647e-21
	ENSMUSG00000063146	Clip2	5	-	134489383	134552434	protein_coding	26.896	28.0352	27.6055	15.0809	13.9515	13.7092	1.93041	1.19306e-22	7.54647e-21
	ENSMUSG00000012428	Steap4	5	+	7960457	7982213	protein_coding	0.560182	0.612496	0.582167	0.053238	0.034763	0.042168	11.1435	1.21628e-22	7.67126e-21
	ENSMUSG00000039137	Whrn	4	-	63414910	63495991	protein_coding	0.719371	0.783426	0.868656	0	0.062888	0.101384	12.3613	1.32918e-22	8.35939e-21
	ENSMUSG00000006218	Fam131c	4	+	141368220	141384175	protein_coding	5.65016	5.48627	4.94472	0.156983	0.267752	0	35.4298	1.57668e-22	9.88773e-21
	ENSMUSG00000021097	Clmn	12	-	104763117	104865076	protein_coding	0.680728	0.764586	0.640194	0.106371	0.294798	0.138186	3.71562	1.60812e-22	1.00562e-20
	ENSMUSG00000005803	Sqor	2	+	122765237	122809569	protein_coding	10.1927	9.98128	10.5146	3.48148	3.28418	2.98073	3.14212	1.64759e-22	1.02739e-20
	ENSMUSG00000039814	Xkr5	8	-	18932729	18950975	protein_coding	0.843523	0.663781	0.4969	3.04378	3.56378	2.94549	0.212271	1.76256e-22	1.09597e-20
	ENSMUSG00000021903	Galnt15	14	+	32028989	32062197	protein_coding	2.60657	2.99697	2.80165	0.882465	0.907246	0.90088	3.1005	2.70901e-22	1.67974e-20
	ENSMUSG00000028545	Bend5	4	+	111415006	111460298	protein_coding	14.3002	13.8903	13.4117	4.30253	4.87849	4.48874	3.0389	2.85019e-22	1.76231e-20
	ENSMUSG00000027667	Zfp639	3	+	32510259	32520833	protein_coding	14.742	15.8218	15.9316	31.8737	30.527	30.2743	0.501865	2.89556e-22	1.78535e-20
	ENSMUSG00000026576	Atp1b1	1	-	164437109	164458355	protein_coding	3.196	2.91817	3.45657	9.12436	8.60735	10.2143	0.343178	4.4095e-22	2.71122e-20
	ENSMUSG00000041827	Oasl1	5	+	114923240	114937915	protein_coding	8.31006	17.0856	8.46761	1.49241	2.00702	1.78866	6.3732	4.4616e-22	2.73111e-20
	ENSMUSG00000038539	Atf5	7	-	44812256	44816658	protein_coding	8.53922	8.59585	7.47927	21.6188	22.5494	17.6436	0.398506	4.46665e-22	2.73111e-20
	ENSMUSG00000027673	Ndufb5	3	+	32736990	32751566	protein_coding	16.2861	17.2452	16.3253	34.8045	36.6961	38.9961	0.451353	4.68501e-22	2.85669e-20
	ENSMUSG00000034220	Gpc1	1	+	92831645	92860779	protein_coding	37.0446	37.0041	38.0442	68.5796	68.8344	61.6572	0.563145	4.73828e-22	2.88119e-20
	ENSMUSG00000046329	Slc25a23	17	-	57043711	57059863	protein_coding	1.59458	2.17825	1.9187	0.345332	0.415579	0.409016	4.76823	5.4506e-22	3.3052e-20
	ENSMUSG00000044921	Rassf9	10	+	102512222	102549736	protein_coding	0.38994	0.327693	0.446437	0.021246	0.010359	0.040065	11.7446	5.92604e-22	3.58363e-20
	ENSMUSG00000060802	B2m	2	+	122147686	122153083	protein_coding	342.057	357.033	351.545	198.82	193.723	186.635	1.81397	7.19379e-22	4.33835e-20
	ENSMUSG00000027656	Ccn5	2	+	163820861	163833146	protein_coding	1.55971	1.55145	1.99969	0.065105	0.181371	0.133929	12.5263	7.7237e-22	4.64519e-20
	ENSMUSG00000031530	Dusp4	8	+	34807297	34819894	protein_coding	29.6504	30.3036	30.8744	15.5317	15.9172	14.2757	1.98578	7.96991e-22	4.78021e-20
	ENSMUSG00000039828	Wdr70	15	-	7873055	8099209	protein_coding	18.156	16.4347	16.5524	35.4591	36.8402	34.0981	0.480826	1.00448e-21	6.00833e-20
	ENSMUSG00000037921	Ddx60	8	+	61928087	62038244	protein_coding	4.21302	4.39326	4.53466	1.75727	1.43163	1.42286	2.83749	1.05832e-21	6.31321e-20
	ENSMUSG00000037736	Limch1	5	+	66745827	67057158	protein_coding	0.258525	0.270081	0.286254	0	0	0.008639	21.8655	1.2108e-21	7.20328e-20
	ENSMUSG00000001918	Slc1a5	7	+	16781340	16798274	protein_coding	23.4008	23.7566	23.7177	42.7781	43.4883	41.5253	0.554719	1.41213e-21	8.37838e-20
	ENSMUSG00000032068	Plet1	9	+	50494525	50505482	protein_coding	63.8181	62.1367	65.0413	34.5386	33.167	32.6471	1.90298	1.47232e-21	8.71202e-20
	ENSMUSG00000014599	Csf1	3	-	107741048	107760469	protein_coding	53.1937	51.8528	49.2678	95.6928	86.461	89.0285	0.56909	1.51725e-21	8.95383e-20
	ENSMUSG00000000693	Loxl3	6	+	83034173	83052562	protein_coding	1.61278	2.02096	2.20019	0.495671	0.23561	0.524635	4.56012	1.59747e-21	9.40203e-20
	ENSMUSG00000025986	Slc39a10	1	-	46807544	46892852	protein_coding	8.8806	10.2649	9.62012	18.2238	17.3332	18.6117	0.531297	1.61059e-21	9.45397e-20
	ENSMUSG00000027699	Ect2	3	-	27097222	27153878	protein_coding	41.0035	41.638	48.6247	73.4294	99.1201	94.9275	0.490814	1.83937e-21	1.07682e-19
	ENSMUSG00000041417	Pik3r1	13	-	101680563	101768217	protein_coding	6.96289	7.08507	6.81326	3.30949	3.23935	3.31925	2.11063	1.8456e-21	1.0776e-19
	ENSMUSG00000035042	Ccl5	11	-	83525778	83530518	protein_coding	16.7799	18.1322	15.8152	3.31022	2.3816	4.06469	5.18646	2.04542e-21	1.1911e-19
	ENSMUSG00000028163	Nfkb1	3	-	135584655	135691547	protein_coding	46.3605	42.7218	51.1107	84.1492	87.5428	84.1154	0.548094	2.37324e-21	1.37836e-19
	ENSMUSG00000002459	Rgs20	1	-	4909576	5070285	protein_coding	4.63267	4.74326	5.53853	1.17361	0.891806	1.14701	4.60904	3.07805e-21	1.783e-19
	ENSMUSG00000022307	Oxr1	15	+	41447482	41861048	protein_coding	20.0881	21.0121	20.5219	35.1408	35.106	35.4254	0.583262	3.14487e-21	1.81692e-19
	ENSMUSG00000044461	Shisa2	14	+	59625308	59631660	protein_coding	0.863854	1.01255	0.842875	0.062489	0.052746	0	18.9299	3.35376e-21	1.93254e-19
	ENSMUSG00000032661	Oas3	5	-	120753098	120777661	protein_coding	15.0053	13.4267	14.834	7.44034	6.43438	6.76002	2.09516	3.61154e-21	2.07565e-19
	ENSMUSG00000039145	Camk1d	2	-	5293457	5714515	protein_coding	0.520362	0.367713	0.499274	0.027546	0.019587	0.042964	11.8017	3.88677e-21	2.22801e-19
	ENSMUSG00000075254	Heg1	16	+	33684370	33771576	protein_coding	13.2309	11.9461	13.131	7.07215	6.38097	7.1352	1.85941	3.93863e-21	2.25188e-19
	ENSMUSG00000000120	Ngfr	11	-	95568818	95587735	protein_coding	0.22623	0.235249	0.306361	0	0	0	26.5947	4.1414e-21	2.36167e-19
	ENSMUSG00000037400	Atp11b	3	+	35754106	35856276	protein_coding	18.1637	19.4449	19.3408	32.2232	35.2724	29.5796	0.58678	5.31126e-21	3.02097e-19
	ENSMUSG00000092541	Gm20537	9	-	88407432	88456616	protein_coding	1.86599	1.32031	0.924193	0	0.011924	0.026955	60.1126	5.41113e-21	3.06984e-19
	ENSMUSG00000020241	Col6a2	10	-	76595762	76623630	protein_coding	0.772625	0.870695	0.782092	0.014241	0.066985	0.013542	19.6798	5.62769e-21	3.18449e-19
	ENSMUSG00000019846	Lama4	10	+	38965515	39110188	protein_coding	0.203725	0.214753	0.185248	0	0	0	21.1242	7.0922e-21	4.00291e-19
	ENSMUSG00000037306	Man1c1	4	-	134561690	134704290	protein_coding	0.879416	0.765513	0.895821	0.088026	0.121618	0.14	6.77148	7.42631e-21	4.18077e-19
	ENSMUSG00000045348	Nyap1	5	-	137729899	137741607	protein_coding	13.6494	13.4808	14.0821	5.73103	6.549	6.01701	2.25035	7.46839e-21	4.19373e-19
	ENSMUSG00000003541	Ier3	17	+	35821684	35822923	protein_coding	124.354	117.589	114.568	59.0541	65.6804	53.3676	2.00155	7.93965e-21	4.44701e-19
	ENSMUSG00000011752	Pgam1	19	+	41911923	41918660	protein_coding	200.496	184.382	200.19	343.788	332.347	341.757	0.574796	9.76314e-21	5.45447e-19
	ENSMUSG00000043903	Zfp469	8	+	122269569	122272650	lincRNA	3.15329	3.23288	3.15254	7.75509	7.73329	8.29763	0.401776	1.03626e-20	5.77471e-19
	ENSMUSG00000027514	Zbp1	2	-	173206612	173218923	protein_coding	4.76551	3.873	4.83168	1.32041	1.11865	1.86529	3.1147	1.33964e-20	7.44651e-19
	ENSMUSG00000037185	Krt80	15	-	101347444	101370162	protein_coding	12.7968	13.0958	12.9623	27.1507	28.6184	24.3997	0.484856	1.37699e-20	7.63485e-19
	ENSMUSG00000047180	Neurl3	1	-	36264597	36274679	protein_coding	40.1197	40.3175	41.2342	21.5878	22.303	20.0581	1.90221	1.43101e-20	7.91445e-19
	ENSMUSG00000069094	Pde7a	3	-	19223108	19311322	protein_coding	10.1782	14.4969	13.0958	23.5885	22.6538	21.531	0.557508	1.53145e-20	8.44868e-19
	ENSMUSG00000020592	Sdc1	12	+	8771323	8793715	protein_coding	101.115	94.5859	84.9673	48.9485	51.2393	45.7001	1.92367	1.6869e-20	9.283e-19
	ENSMUSG00000056758	Hmga2	10	-	120361275	120476469	protein_coding	42.819	46.3098	43.5108	24.126	23.789	24.6154	1.8284	1.8143e-20	9.95917e-19
	ENSMUSG00000022033	Pbk	14	+	65805837	65817822	protein_coding	33.1523	34.0986	33.298	58.1215	60.2307	64.7519	0.549209	2.19302e-20	1.20081e-18
	ENSMUSG00000021306	Gpr137b	13	-	13357620	13394014	protein_coding	24.1714	25.1533	24.9325	13.1505	12.6882	12.1284	1.95508	2.20026e-20	1.20179e-18
	ENSMUSG00000072214	Sept5	16	-	18620502	18629954	protein_coding	9.90203	9.99316	10.2675	3.43285	3.8875	3.17509	2.86854	2.22634e-20	1.21303e-18
	ENSMUSG00000049940	Pgrmc2	3	-	41066326	41083046	protein_coding	14.8595	14.7187	14.1356	25.8477	28.2033	26.8256	0.54067	2.31509e-20	1.25826e-18
	ENSMUSG00000026259	Ngef	1	-	87476834	87573870	protein_coding	5.64524	6.2996	6.08195	2.17479	2.30559	1.81973	2.85252	2.44295e-20	1.32449e-18
	ENSMUSG00000027746	Ufm1	3	-	53853376	53863830	protein_coding	4.69623	5.11773	4.83751	9.3427	10.0416	9.92142	0.500464	2.69173e-20	1.45578e-18
	ENSMUSG00000035835	Plppr3	10	-	79860475	79874634	protein_coding	1.80276	1.1323	1.68165	0.018361	0.120929	0.127141	15.6755	2.73313e-20	1.47455e-18
	ENSMUSG00000028542	Slc6a9	4	+	117834506	117875198	protein_coding	5.09771	5.63135	5.34421	12.7569	12.54	10.6914	0.447086	2.80302e-20	1.50856e-18
	ENSMUSG00000000154	Slc22a18	7	+	143473736	143499334	protein_coding	3.94821	3.68371	4.17842	0.934686	0.664783	0.941051	4.6062	2.87225e-20	1.54205e-18
	ENSMUSG00000033590	Myo5c	9	+	75232020	75305451	protein_coding	1.81775	2.24026	2.09912	0.674873	0.435711	0.411788	3.9856	3.07699e-20	1.64795e-18
	ENSMUSG00000038893	Fam117a	11	+	95337018	95381872	protein_coding	1.41586	1.58452	1.76012	0.320765	0.293142	0.382668	4.66649	3.09956e-20	1.65601e-18
	ENSMUSG00000062070	Pgk1	X	+	106187100	106203699	protein_coding	452.474	440.272	476.393	760.941	771.037	832.27	0.579107	3.77193e-20	2.01036e-18
	ENSMUSG00000048106	4632415L05Rik	3	+	19894886	19898984	lincRNA	3.24512	3.37889	3.39504	7.83392	7.36641	7.17166	0.448578	4.22769e-20	2.24782e-18
	ENSMUSG00000057098	Ebf1	11	+	44617317	45008091	protein_coding	1.65408	1.60381	1.27374	0.33737	0.359961	0.551201	3.56787	4.58284e-20	2.43078e-18
	ENSMUSG00000053846	Lipg	18	-	74939322	74961263	protein_coding	20.7596	20.4604	20.4714	36.5619	35.2976	36.5962	0.568936	5.13292e-20	2.716e-18
	ENSMUSG00000031358	Msl3	X	-	168654117	168673898	protein_coding	10.5726	9.71231	8.79251	20.4023	19.0154	21.3265	0.478944	6.04623e-20	3.1916e-18
	ENSMUSG00000027710	Acad9	3	+	36065979	36092853	protein_coding	13.2739	13.4105	12.2611	26.8789	21.0844	23.6992	0.543648	8.2023e-20	4.31935e-18
	ENSMUSG00000031383	Dusp9	X	+	73639419	73643514	protein_coding	12.7709	12.7755	12.5515	22.6574	25.2474	23.9195	0.530628	8.28613e-20	4.35308e-18
	ENSMUSG00000021803	Cdhr1	14	-	37077857	37098347	protein_coding	1.52366	1.44146	1.52563	0.31681	0.389264	0.253485	4.56845	9.70299e-20	5.08529e-18
	ENSMUSG00000034917	Tjp3	10	-	81273207	81291581	protein_coding	9.603	8.71925	10.2493	3.85243	4.2029	3.44425	2.48071	1.21468e-19	6.35094e-18
	ENSMUSG00000034353	Ramp1	1	+	91179822	91225196	protein_coding	0.821693	0.827955	1.26818	0.076748	0.091161	0.020171	13.5172	1.34877e-19	7.03534e-18
	ENSMUSG00000004897	Hdgf	3	+	87906321	87916132	protein_coding	167.223	167.374	163.425	264.544	278.654	285.375	0.601074	1.43859e-19	7.48613e-18
	ENSMUSG00000040618	Pck2	14	+	55540266	55551242	protein_coding	16.7684	17.7631	17.5354	29.5729	29.0335	25.8253	0.616811	1.49198e-19	7.74564e-18
	ENSMUSG00000024253	Dync2li1	17	+	84626496	84655588	protein_coding	4.80004	5.06725	4.54851	1.032	1.02942	0.61462	5.33835	1.64249e-19	8.50695e-18
	ENSMUSG00000032717	Mdfi	17	-	47815328	47834691	protein_coding	0.544028	0.673201	0.822487	0.032869	0	0	32.9211	1.77223e-19	9.15734e-18
	ENSMUSG00000031093	Dock11	X	+	35888832	36076562	protein_coding	3.89534	4.08627	3.95644	8.63817	7.70329	7.49096	0.501544	1.79535e-19	9.25511e-18
	ENSMUSG00000015085	Entpd2	2	+	25395874	25401321	protein_coding	0.935057	1.12525	0.959518	0.144063	0	0.068754	12.5602	1.86387e-19	9.58589e-18
	ENSMUSG00000019997	Ccn2	10	+	24595442	24598683	protein_coding	78.1378	80.799	73.0283	127.275	142.165	140.086	0.566455	2.00063e-19	1.02652e-17
	ENSMUSG00000066363	Serpina3f	12	+	104214544	104221129	protein_coding	0	0	0	0.334149	0.315176	0.356173	0.0289716	2.0284e-19	1.03835e-17
	ENSMUSG00000051855	Mest	6	+	30723547	30748465	protein_coding	4.7613	4.62824	4.6942	1.37829	1.38011	1.56935	3.23877	2.16887e-19	1.10768e-17
	ENSMUSG00000034349	Smc4	3	+	69004738	69034623	protein_coding	60.204	54.0964	70.3172	117.939	117.967	110.233	0.533403	2.41679e-19	1.23144e-17
	ENSMUSG00000028194	Ddah1	3	+	145758675	145894277	protein_coding	32.0063	30.3545	31.2434	52.5557	51.882	54.9945	0.587187	2.50531e-19	1.2736e-17
	ENSMUSG00000025203	Scd2	19	+	44293674	44306864	protein_coding	61.7924	58.3931	58.8533	126.275	99.1065	106.414	0.539647	2.71301e-19	1.37601e-17
	ENSMUSG00000038736	Nudcd1	15	-	44373163	44428307	protein_coding	12.9033	14.7086	13.5974	27.1827	24.4839	28.1904	0.51622	2.86977e-19	1.45217e-17
	ENSMUSG00000074794	Arrdc3	13	+	80883384	80896042	protein_coding	7.71677	7.50751	7.88877	3.23619	3.2616	3.43103	2.32387	2.88219e-19	1.45511e-17
	ENSMUSG00000028270	Gbp2	3	+	142620602	142638008	protein_coding	15.958	14.5142	15.6868	6.72722	7.48939	6.94642	2.17944	2.90139e-19	1.46145e-17
	ENSMUSG00000040811	Eml2	7	+	19176421	19206482	protein_coding	56.8985	50.0102	57.0946	29.0243	29.2535	26.6022	1.93185	2.94294e-19	1.47899e-17
	ENSMUSG00000030091	Nup210	6	-	91013068	91116829	protein_coding	12.7018	11.9047	12.2446	18.6532	19.127	17.0813	0.671891	4.09424e-19	2.0529e-17
	ENSMUSG00000032899	Styk1	6	-	131299142	131353597	protein_coding	5.95134	5.39538	5.68084	1.85275	1.7051	1.99676	3.05439	4.37625e-19	2.18932e-17
	ENSMUSG00000006360	Crip1	12	+	113146316	113153879	protein_coding	56.5217	48.0426	54.4964	17.6765	21.3884	19.9471	2.69453	4.47709e-19	2.23469e-17
	ENSMUSG00000029392	Rilpl1	5	-	124493080	124531391	protein_coding	4.81516	5.14501	5.38945	1.61048	1.10317	1.17107	3.92866	4.53286e-19	2.25741e-17
	ENSMUSG00000024621	Csf1r	18	+	61100598	61132149	protein_coding	1.48776	1.83208	1.20798	0.449106	0.394958	0.456916	3.42441	4.63037e-19	2.30076e-17
	ENSMUSG00000022223	Sdr39u1	14	-	55897283	55900293	protein_coding	8.89042	7.79728	7.9383	23.7978	24.4571	21.0815	0.355446	4.67417e-19	2.3173e-17
	ENSMUSG00000074305	Peak1	9	-	56201126	56418067	protein_coding	22.0723	22.2318	22.7851	12.8043	12.7613	12.495	1.76209	5.78682e-19	2.86246e-17
	ENSMUSG00000091243	Vgll3	16	+	65815257	65866368	protein_coding	2.69072	2.00466	2.13779	0.576459	0.647909	0.670475	3.56557	6.13144e-19	3.02613e-17
	ENSMUSG00000040653	Ppp1r14c	10	+	3366057	3464975	protein_coding	2.55877	2.54184	2.61217	0.19828	0.51011	0.277653	7.62052	6.54314e-19	3.22209e-17
	ENSMUSG00000056019	Zfp709	8	+	71882019	71895727	protein_coding	0.372159	0.608476	0.424417	0.027392	0.022868	0.032399	12.738	8.01735e-19	3.93924e-17
	ENSMUSG00000035769	Xylb	9	+	119357381	119393797	protein_coding	1.05307	0.872474	1.01165	0.148681	0.171341	0.130924	6.1695	8.98518e-19	4.40494e-17
	ENSMUSG00000019978	Epb41l2	10	+	25359798	25523519	protein_coding	111.503	93.9248	99.4808	191.164	155.106	154.384	0.609044	9.01989e-19	4.4073e-17
	ENSMUSG00000038375	Trp53inp2	2	+	155381059	155389850	protein_coding	6.16753	5.06262	6.16382	2.03048	2.05414	2.13116	2.78972	9.03005e-19	4.4073e-17
	ENSMUSG00000033209	Ttc28	5	+	110879803	111289780	protein_coding	0.78732	0.829127	0.613555	0.180465	0.142421	0.089454	5.1092	9.77314e-19	4.75943e-17
	ENSMUSG00000017978	Cadps2	6	-	23262773	23839421	protein_coding	1.28612	1.21707	1.1877	0.203717	0.285239	0.179117	5.33023	9.88716e-19	4.80433e-17
	ENSMUSG00000110618	Gm39822	11	+	51898966	51909624	lincRNA	0.154498	0.158976	0.084799	1.09796	1.50062	0.997182	0.118119	1.0888e-18	5.27901e-17
	ENSMUSG00000039202	Abhd2	7	+	79273199	79365508	protein_coding	57.8046	54.9314	57.5454	34.0798	33.1675	32.3544	1.70941	1.09187e-18	5.28226e-17
	ENSMUSG00000043885	Slc36a4	9	+	15709738	15743361	protein_coding	1.04528	1.3111	0.956861	0.114502	0.099239	0.076243	10.4482	1.38885e-18	6.70424e-17
	ENSMUSG00000028124	Gclm	3	+	122245557	122270732	protein_coding	5.86484	5.93483	6.09063	11.4029	11.0536	11.6285	0.525291	1.4153e-18	6.81699e-17
	ENSMUSG00000037106	Fer1l6	15	+	58510048	58665092	protein_coding	0.31326	0.278928	0.370512	0.019652	0.019194	0.047925	8.50125	1.47801e-18	7.10348e-17
	ENSMUSG00000030852	Tacc2	7	+	130577438	130764785	protein_coding	23.0623	23.1918	24.5588	13.8588	14.3975	12.6535	1.73042	1.55849e-18	7.47397e-17
	ENSMUSG00000027168	Pax6	2	+	105668900	105697364	protein_coding	0.394305	0.625087	0.648211	0	0.035022	0	26.1081	1.69265e-18	8.09972e-17
	ENSMUSG00000022483	Col2a1	15	-	97975602	98004695	protein_coding	0.577699	0.578265	0.798853	0.022037	0	0.039099	21.7786	1.82821e-18	8.72941e-17
	ENSMUSG00000056025	Clca3a1	3	-	144729677	144760977	protein_coding	0.171022	0.201741	0.196562	0	0	0	19.9775	1.89252e-18	9.01689e-17
	ENSMUSG00000023009	Nckap5l	15	-	99422035	99457748	protein_coding	1.06572	0.801614	0.699912	0.131414	0.1243	0.157493	5.86012	2.26411e-18	1.07641e-16
	ENSMUSG00000008540	Mgst1	6	+	138140316	138156755	protein_coding	18.5855	15.7833	19.8249	6.65248	6.63343	5.47126	2.88621	2.27597e-18	1.07971e-16
	ENSMUSG00000040729	Cep126	9	-	8076461	8134294	protein_coding	1.58393	1.66196	1.94044	0.268424	0.352649	0.171917	6.33827	2.45483e-18	1.16055e-16
	ENSMUSG00000024493	Lars	18	-	42202298	42262194	protein_coding	40.4888	41.3947	39.6645	65.2081	68.4663	68.3245	0.601785	2.45691e-18	1.16055e-16
	ENSMUSG00000045027	Prss22	17	-	23993534	23998100	protein_coding	36.9425	38.5888	36.367	19.8254	18.2827	18.6088	1.97241	2.47672e-18	1.1674e-16
	ENSMUSG00000027679	Dnajc19	3	-	34056020	34081321	protein_coding	13.7729	13.8212	13.3545	29.9662	31.6399	32.446	0.435562	2.86246e-18	1.34634e-16
	ENSMUSG00000034271	Jdp2	12	+	85599027	85639878	protein_coding	13.7495	14.0029	14.4423	27.7688	26.9917	26.4178	0.519955	2.98151e-18	1.39934e-16
	ENSMUSG00000036109	Mbnl3	X	-	51117269	51206532	protein_coding	9.30908	10.419	9.87385	20.2556	16.7452	20.6414	0.513799	2.98923e-18	1.39998e-16
	ENSMUSG00000068874	Selenbp1	3	+	94933056	94944758	protein_coding	0.594968	0.761186	0.82132	0.049275	0	0	27.8458	3.26912e-18	1.52781e-16
	ENSMUSG00000024854	Pold4	19	+	4231899	4233634	protein_coding	56.7762	53.3402	54.3721	27.7766	28.3805	23.6788	2.05993	3.31955e-18	1.54631e-16
	ENSMUSG00000014313	Cox6c	15	-	35925886	35938246	protein_coding	93.7091	91.0032	93.4774	159.99	165.071	164.715	0.56802	3.32276e-18	1.54631e-16
	ENSMUSG00000033386	Frrs1	3	+	116859464	116908177	protein_coding	14.2251	13.6568	14.0225	21.9304	21.3397	22.6617	0.635738	3.46444e-18	1.60885e-16
	ENSMUSG00000047428	Dlk2	17	+	46297421	46303271	protein_coding	3.36504	3.04883	3.00378	9.22633	8.45386	9.64701	0.345344	3.47284e-18	1.60935e-16
	ENSMUSG00000022894	Adamts5	16	-	85856173	85901828	protein_coding	0.144544	0.216882	0.215611	0.015635	0.020904	0.006164	8.34955	3.66734e-18	1.69591e-16
	ENSMUSG00000022299	Slc25a32	15	-	39091231	39112716	protein_coding	5.27525	5.67626	5.65945	9.84418	10.5989	9.65767	0.552292	3.91297e-18	1.80571e-16
	ENSMUSG00000027375	Mal	2	-	127633226	127656695	protein_coding	5.62936	5.5202	5.7464	11.5372	11.538	12.9169	0.469877	4.49271e-18	2.0689e-16
	ENSMUSG00000046714	Foxc2	8	+	121116171	121118895	protein_coding	7.28173	7.21139	7.30116	2.96172	2.85859	2.58064	2.58859	5.21397e-18	2.39603e-16
	ENSMUSG00000073557	Ppp1r12b	1	-	134754658	134955942	protein_coding	52.7725	52.8489	49.0866	29.3611	29.9967	31.0657	1.71069	5.39704e-18	2.47499e-16
	ENSMUSG00000057751	Megf6	4	+	154170730	154275713	protein_coding	9.78214	9.9527	9.21986	5.7627	5.3038	4.37334	1.87363	5.83175e-18	2.66878e-16
	ENSMUSG00000040610	Tlx3	11	-	33200752	33203589	protein_coding	2.78913	2.45512	2.72866	0.311828	0.071544	0.274237	11.6388	6.512e-18	2.97391e-16
	ENSMUSG00000032812	Arap1	7	+	101348067	101412586	protein_coding	10.9724	11.3403	10.943	5.8769	5.5835	6.02245	1.90064	6.68203e-18	3.04523e-16
	ENSMUSG00000038777	Sema6c	3	+	95160457	95174024	protein_coding	3.4219	3.16661	2.97895	0.915777	1.0478	1.18845	3.01615	7.19797e-18	3.27359e-16
	ENSMUSG00000036632	Alg5	3	+	54735539	54751318	protein_coding	10.2125	12.3948	11.5842	23.108	24.5082	25.816	0.465838	7.26142e-18	3.29564e-16
	ENSMUSG00000026888	Grb14	2	-	64912476	65024987	protein_coding	2.45134	1.86199	1.95941	0.3486	0.241127	0.42077	6.05743	7.40898e-18	3.35569e-16
	ENSMUSG00000043079	Synpo	18	-	60593973	60660142	protein_coding	7.16581	7.13807	6.97388	3.01991	2.03519	1.67692	3.15109	7.4307e-18	3.35862e-16
	ENSMUSG00000017707	Serinc3	2	-	163623272	163645131	protein_coding	52.7837	55.4288	54.8317	32.3586	30.6974	32.5495	1.70516	7.58214e-18	3.41652e-16
	ENSMUSG00000017491	Rarb	14	-	16430839	16819156	protein_coding	1.43577	1.00923	1.11202	0	0.052933	0.098829	19.7347	7.58986e-18	3.41652e-16
	ENSMUSG00000000791	Il12rb1	8	+	70808449	70821424	protein_coding	2.32956	2.13683	2.80394	0.422874	0.502807	0.361646	5.54178	8.92338e-18	4.0086e-16
	ENSMUSG00000020142	Slc1a4	11	-	20302180	20332713	protein_coding	9.78739	11.2789	10.5894	21.3992	19.6685	18.2296	0.534083	9.09945e-18	4.07937e-16
	ENSMUSG00000022247	Brix1	15	-	10474779	10485947	protein_coding	13.9956	15.1041	15.4893	25.9007	26.9274	30.5005	0.535266	9.38423e-18	4.19849e-16
	ENSMUSG00000034485	Uaca	9	+	60794542	60880370	protein_coding	25.517	23.4557	25.2749	14.0181	12.7098	13.4028	1.84951	1.30104e-17	5.80904e-16
	ENSMUSG00000015944	Castor2	5	+	134099711	134144343	protein_coding	9.14532	8.43563	9.61345	4.84196	4.84182	4.75136	1.88207	1.31055e-17	5.83965e-16
	ENSMUSG00000028165	Cisd2	3	-	135406412	135423925	protein_coding	7.46661	8.24742	8.48058	14.3882	14.4196	14.1834	0.563085	1.40088e-17	6.22955e-16
	ENSMUSG00000027751	Supt20	3	+	54692807	54728766	protein_coding	21.1025	20.949	22.1909	37.5999	38.182	36.3243	0.573164	1.53422e-17	6.80871e-16
	ENSMUSG00000047501	Cldn4	5	-	134945119	134946934	protein_coding	251.661	253.298	241.411	142.044	152.356	148.375	1.68562	1.57003e-17	6.95363e-16
	ENSMUSG00000068587	Mgam	6	+	40628831	40769123	protein_coding	0.368518	0.278308	0.306206	0.017336	0	0.010253	17.0698	1.60137e-17	7.07817e-16
	ENSMUSG00000022261	Sdc2	15	+	32920723	33034935	protein_coding	17.1314	16.4724	16.5144	28.0199	28.805	29.5321	0.580506	1.73883e-17	7.67036e-16
	ENSMUSG00000028953	Abcf2	5	-	24565345	24577467	protein_coding	36.838	38.4427	38.4839	63.4568	62.3224	63.0791	0.602444	1.76151e-17	7.75487e-16
	ENSMUSG00000041084	Ostc	3	-	130695912	130709444	protein_coding	35.9558	33.8819	31.9657	59.2641	64.1431	62.6477	0.547242	1.90656e-17	8.37667e-16
	ENSMUSG00000031827	Cotl1	8	-	119809222	119840544	protein_coding	46.937	45.8947	36.7461	16.0053	21.6869	14.4332	2.48503	2.03362e-17	8.91713e-16
	ENSMUSG00000039704	Lmbrd2	15	+	9140550	9202483	protein_coding	8.76986	9.36319	9.61492	15.8262	15.5304	16.1596	0.584231	2.06563e-17	9.03949e-16
	ENSMUSG00000004791	Pgf	12	-	85166635	85177790	protein_coding	0.122887	0.133762	0.178663	2.04725	1.64213	1.07224	0.0971095	2.60935e-17	1.13807e-15
	ENSMUSG00000029769	Ccdc136	6	+	29396309	29426994	protein_coding	14.4387	12.6854	12.9222	6.55928	6.66026	6.18151	2.06249	2.61097e-17	1.13807e-15
	ENSMUSG00000022300	Dcaf13	15	+	39112865	39146856	protein_coding	31.2552	33.8957	32.025	55.1526	57.7721	59.0797	0.565038	2.87131e-17	1.24908e-15
	ENSMUSG00000024378	Stard4	18	-	33199355	33213862	protein_coding	11.0521	12.3261	11.8353	19.9245	21.8778	20.4587	0.565788	2.90075e-17	1.25939e-15
	ENSMUSG00000040749	Siah1b	X	-	164070705	164076493	protein_coding	2.34328	2.61571	3.10059	8.33697	9.21293	8.72378	0.307546	2.96486e-17	1.2847e-15
	ENSMUSG00000027200	Sema6d	2	+	124089969	124667770	protein_coding	0.379641	0.529967	0.416876	0.023448	0.034573	0.061937	9.04576	3.04635e-17	1.31741e-15
	ENSMUSG00000058258	Idi1	13	+	8885501	8892451	protein_coding	10.7907	12.6783	10.2404	21.0465	21.7542	24.5188	0.50096	3.1513e-17	1.36012e-15
	ENSMUSG00000066621	Tecpr1	5	-	144194442	144223615	protein_coding	9.49854	9.60263	9.51071	5.72501	5.04561	4.71864	1.84557	3.21419e-17	1.38455e-15
	ENSMUSG00000066026	Dhrs3	4	+	144892827	144928209	protein_coding	1.66176	2.06212	2.04891	0.206897	0.31896	0.33353	6.52448	3.34146e-17	1.43649e-15
	ENSMUSG00000022178	Ajuba	14	-	54567472	54577558	protein_coding	34.1157	31.0564	33.3099	52.7473	56.202	54.1796	0.60378	3.3478e-17	1.43649e-15
	ENSMUSG00000110126	Gm9347	7	+	136810909	136812515	processed_pseudogene	9.15767	8.76011	8.84213	17.8534	18.5741	19.5236	0.478553	3.52628e-17	1.51013e-15
	ENSMUSG00000022656	Nectin3	16	-	46387706	46498525	protein_coding	8.08687	8.09405	8.07878	3.88466	3.44197	4.31658	2.08081	3.66359e-17	1.56588e-15
	ENSMUSG00000048249	Crebrf	17	+	26715650	26776635	protein_coding	4.77647	5.65191	6.53236	3.59713	3.46144	2.32844	1.80426	3.7816e-17	1.61319e-15
	ENSMUSG00000022283	Pabpc1	15	-	36595661	36609668	protein_coding	777.355	835.402	861.275	1363.18	1323.54	1305.22	0.61976	4.27169e-17	1.81873e-15
	ENSMUSG00000038963	Slco4a1	2	+	180456245	180474867	protein_coding	0.732402	0.969259	0.778867	0.154714	0.123436	0.146388	5.52325	4.44423e-17	1.88854e-15
	ENSMUSG00000039159	Ube2h	6	-	30211289	30304539	protein_coding	28.4052	26.7092	27.9012	16.2416	15.8687	14.8161	1.76857	4.46648e-17	1.89434e-15
	ENSMUSG00000028015	Ctso	3	+	81932601	81956725	protein_coding	3.71363	3.98137	4.10754	1.25441	1.49565	1.40742	2.82569	4.96999e-17	2.10384e-15
	ENSMUSG00000068246	Apol9b	15	+	77729039	77736382	protein_coding	26.7635	26.8582	28.3606	10.3166	13.6085	12.607	2.2431	5.17326e-17	2.18568e-15
	ENSMUSG00000050232	Cxcr3	X	-	101731535	101734269	protein_coding	0.277177	0.533224	0.561213	0	0	0	46.7205	5.29825e-17	2.2342e-15
	ENSMUSG00000006143	Upk3bl	5	+	136054492	136064326	protein_coding	7.68107	6.65125	7.79397	1.71162	1.4753	1.90501	4.32577	5.34295e-17	2.24874e-15
	ENSMUSG00000023055	Calcoco1	15	-	102706777	102722178	protein_coding	18.7325	16.6309	18.0589	8.58271	9.90199	9.10686	1.93517	6.07289e-17	2.55108e-15
	ENSMUSG00000061048	Cdh3	8	+	106510891	106557297	protein_coding	0.801311	0.67402	0.760831	0.070555	0.1062	0.151733	6.32144	6.30213e-17	2.64233e-15
	ENSMUSG00000030342	Cd9	6	-	125460266	125494791	protein_coding	290.273	283.639	288.545	166.43	175.646	174.907	1.66821	7.05352e-17	2.95175e-15
	ENSMUSG00000022295	Atp6v1c1	15	+	38661933	38692446	protein_coding	20.3742	21.8532	20.1888	33.2046	32.7111	38.7098	0.596683	7.71024e-17	3.22045e-15
	ENSMUSG00000033166	Dis3	14	-	99075206	99099770	protein_coding	14.0083	14.4305	14.0349	23.6127	22.5645	25.2382	0.594912	8.5029e-17	3.54481e-15
	ENSMUSG00000040570	Rundc3b	5	-	8490334	8622952	protein_coding	4.46227	4.22293	4.49986	1.43806	1.45416	1.85606	2.76565	8.89637e-17	3.70183e-15
	ENSMUSG00000039934	Gsap	5	+	21186255	21315132	protein_coding	3.77286	4.13163	4.54372	1.40305	1.62668	1.55068	2.70653	9.26758e-17	3.84902e-15
	ENSMUSG00000026728	Vim	2	+	13573927	13582826	protein_coding	289.815	250.607	254.071	129.698	153.944	154.998	1.81121	9.80665e-17	4.06524e-15
	ENSMUSG00000012350	Ehf	2	-	103263433	103303278	protein_coding	14.2598	14.2137	14.5499	7.27719	7.75099	8.10232	1.85891	1.02859e-16	4.25589e-15
	ENSMUSG00000034706	Dnaic2	11	+	114727408	114757889	protein_coding	0.543144	0.339336	0.292059	0	0	0	40.1513	1.03159e-16	4.2603e-15
	ENSMUSG00000031381	Piga	X	+	164419787	164433916	protein_coding	2.2839	2.16862	2.43677	5.3633	5.70963	6.09362	0.402365	1.23886e-16	5.10671e-15
	ENSMUSG00000041351	Rap1gap	4	+	137664726	137729861	protein_coding	14.3892	13.098	13.9755	6.24911	5.58815	5.69327	2.36284	1.40396e-16	5.77646e-15
	ENSMUSG00000030921	Trim30a	7	-	104409025	104465193	protein_coding	1.2933	1.34873	1.62656	0.229466	0.317314	0.339769	4.68997	1.43481e-16	5.89235e-15
	ENSMUSG00000032902	Slc16a1	3	+	104638668	104658462	protein_coding	38.7921	39.5842	39.78	61.8419	63.2802	65.9351	0.618494	1.44592e-16	5.92691e-15
	ENSMUSG00000004952	Rasa4	5	+	136083916	136111860	protein_coding	39.409	37.8895	39.7247	21.7543	21.9435	22.8343	1.75856	1.48233e-16	6.06486e-15
	ENSMUSG00000042306	S100a14	3	+	90526856	90528837	protein_coding	15.7286	13.8775	14.6571	5.4266	5.7381	5.31161	2.68341	1.49031e-16	6.07924e-15
	ENSMUSG00000040264	Gbp2b	3	+	142594847	142619179	protein_coding	8.59987	8.28813	8.34242	3.74077	3.50057	3.59367	2.32493	1.49136e-16	6.07924e-15
	ENSMUSG00000037174	Elf2	3	-	51252720	51340663	protein_coding	24.6094	24.9661	24.6527	40.5741	41.2533	41.1614	0.603633	1.51915e-16	6.18107e-15
	ENSMUSG00000032548	Slco2a1	9	+	102988712	103096002	protein_coding	38.7058	37.8255	33.872	21.4892	21.1094	19.771	1.76978	1.57464e-16	6.395e-15
	ENSMUSG00000097084	Foxl1	8	+	121127940	121130644	protein_coding	1.84737	2.04714	2.43536	0.457466	0.486216	0.577917	4.09891	1.63726e-16	6.6371e-15
	ENSMUSG00000016382	Pls3	X	-	75785654	75875182	protein_coding	108.673	112.346	106.651	65.1785	59.8835	67.1607	1.70453	1.71389e-16	6.93496e-15
	ENSMUSG00000024909	Efemp2	19	+	5473954	5482517	protein_coding	21.331	19.41	17.3039	32.5122	30.576	30.3682	0.621212	1.77845e-16	7.18299e-15
	ENSMUSG00000039519	Cyp7b1	3	-	18071950	18243338	protein_coding	0.579123	0.391328	0.603227	0	0.025318	0.030711	18.6411	1.7944e-16	7.23411e-15
	ENSMUSG00000038203	Hoxa13	6	-	52257694	52260880	protein_coding	0.808454	1.0232	1.29793	0.085382	0.068234	0	17.2076	1.83701e-16	7.39237e-15
	ENSMUSG00000038545	Cul7	17	+	46650337	46664364	protein_coding	22.4435	20.6714	25.7702	12.9279	12.5557	11.0821	1.88315	2.0006e-16	8.03598e-15
	ENSMUSG00000047757	Fancb	X	+	164980592	164997272	protein_coding	1.8593	2.54218	2.22486	5.88223	5.85212	6.14143	0.371743	2.06033e-16	8.26084e-15
	ENSMUSG00000042207	Kdm5b	1	+	134560171	134635285	protein_coding	10.9242	11.6993	11.1897	6.7086	5.65183	6.97007	1.74805	2.13423e-16	8.54156e-15
	ENSMUSG00000036995	Asap3	4	+	136206365	136245216	protein_coding	8.21408	7.41267	8.66736	3.9902	3.79618	3.31596	2.185	2.17059e-16	8.67134e-15
	ENSMUSG00000027463	Slc52a3	2	+	151996511	152009258	protein_coding	1.98917	1.56984	1.15293	0.231362	0.302509	0.224308	6.01632	2.36597e-16	9.43473e-15
	ENSMUSG00000042734	Ttc9	12	+	81631249	81667557	protein_coding	40.9993	39.3418	40.1005	22.9807	23.5699	20.795	1.78806	2.51814e-16	1.00234e-14
	ENSMUSG00000036136	Fam110c	12	+	31073861	31080251	protein_coding	10.8151	10.4958	10.2876	5.21601	4.94306	5.23096	2.05113	2.55293e-16	1.01384e-14
	ENSMUSG00000069806	Cacng7	7	+	3332955	3368221	protein_coding	0.927747	0.858153	0.70076	0.038137	0.104785	0.045108	11.5427	2.55626e-16	1.01384e-14
	ENSMUSG00000035385	Ccl2	11	+	82035571	82037453	protein_coding	0.424493	0.214056	0.766119	3.86614	4.08131	3.54687	0.12449	2.81957e-16	1.11627e-14
	ENSMUSG00000021070	Bdkrb2	12	+	105563226	105595237	protein_coding	33.7972	34.1279	33.1164	19.3445	20.1446	19.5541	1.71095	2.83537e-16	1.1205e-14
	ENSMUSG00000059970	Hspa2	12	+	76404176	76406938	protein_coding	3.21138	3.04566	2.64802	0.773047	0.490936	0.806951	4.2529	2.98082e-16	1.17588e-14
	ENSMUSG00000037624	Kcnk2	1	-	189207930	189402273	protein_coding	9.00141	9.02174	6.59894	3.19631	3.46765	3.16137	2.5014	3.15662e-16	1.243e-14
	ENSMUSG00000033306	Lpp	16	+	24393507	24992578	protein_coding	13.4745	13.4057	14.1193	8.48122	7.97459	8.26999	1.65737	3.35937e-16	1.32047e-14
	ENSMUSG00000028179	Cth	3	-	157894248	157925077	protein_coding	4.28053	5.11088	3.79259	11.1371	11.6897	10.697	0.393815	3.36972e-16	1.32218e-14
	ENSMUSG00000015189	Casd1	6	+	4600839	4643355	protein_coding	7.6886	8.69591	7.71565	15.6502	14.0928	14.9811	0.539172	3.79779e-16	1.48749e-14
	ENSMUSG00000027763	Mbnl1	3	+	60472830	60629750	protein_coding	22.1764	23.5415	23.9208	46.3893	67.8781	45.8805	0.434946	3.89894e-16	1.5244e-14
	ENSMUSG00000030917	Tmem159	7	+	120102353	120120992	protein_coding	1.92313	1.45381	2.49457	0	0.113129	0	41.2321	4.02943e-16	1.57262e-14
	ENSMUSG00000027680	Fxr1	3	+	34019943	34070322	protein_coding	48.7116	62.2228	49.6157	81.1699	77.0012	82.7835	0.66635	4.16194e-16	1.62146e-14
	ENSMUSG00000037031	Tspan15	10	-	62185396	62231251	protein_coding	1.33007	0.973986	1.05983	2.83838	3.90354	3.39798	0.333719	4.38839e-16	1.70666e-14
	ENSMUSG00000048387	Osr1	12	+	9570116	9581500	protein_coding	0.029821	0.097297	0.450629	2.75929	2.37898	2.78432	0.0764213	4.47262e-16	1.73636e-14
	ENSMUSG00000091055	Siglec15	18	-	78043614	78057395	protein_coding	0.921785	0.971671	1.25527	0.04865	0.095825	0.071427	12.9268	4.48711e-16	1.73891e-14
	ENSMUSG00000042082	Arsb	13	+	93771630	93943016	protein_coding	9.77648	9.95677	8.99748	17.0947	16.2106	17.084	0.570431	4.87631e-16	1.88642e-14
	ENSMUSG00000006057	Atp5g1	11	-	96068852	96075670	protein_coding	20.7129	23.3628	23.1971	47.6439	50.3408	49.1831	0.457227	4.99112e-16	1.92745e-14
	ENSMUSG00000032313	Tmem266	9	+	55326913	55438345	protein_coding	1.83226	1.94415	1.61109	4.67498	5.23747	5.07169	0.360827	5.03822e-16	1.94223e-14
	ENSMUSG00000027276	Jag1	2	-	137081456	137116644	protein_coding	24.7174	24.4194	25.1623	15.1139	14.296	13.8782	1.71589	5.09641e-16	1.96123e-14
	ENSMUSG00000028037	Ifi44	3	-	151730922	151749960	protein_coding	1.4169	1.42857	1.33934	0.363975	0.347688	0.375292	3.77348	5.29476e-16	2.034e-14
	ENSMUSG00000027253	Lrp4	2	+	91457511	91513779	protein_coding	0.716207	0.639255	0.812132	2.03668	1.68403	1.82126	0.394402	5.67735e-16	2.17718e-14
	ENSMUSG00000039891	Txlnb	10	+	17796226	17845665	protein_coding	0.8964	1.08554	0.917498	0.289475	0.19087	0.267643	3.7654	6.66325e-16	2.55081e-14
	ENSMUSG00000101431	Gm7901	8	-	75711600	75713196	processed_pseudogene	7.70959	6.89688	7.55592	15.0236	17.1592	16.5021	0.455557	6.72037e-16	2.56821e-14
	ENSMUSG00000022708	Zbtb20	16	+	42875881	43642602	protein_coding	4.56458	4.20904	5.46798	2.75264	2.70327	2.15421	1.86798	7.44232e-16	2.83918e-14
	ENSMUSG00000026207	Speg	1	+	75375297	75432320	protein_coding	1.81816	1.71839	1.40233	0.005207	0.048487	0.273908	13.895	7.51935e-16	2.8636e-14
	ENSMUSG00000024610	Cd74	18	+	60803848	60812652	protein_coding	1.92418	2.02602	2.15732	5.49183	6.0603	7.20995	0.326601	7.80929e-16	2.96888e-14
	ENSMUSG00000045095	Magi1	6	-	93675455	94283917	protein_coding	10.123	13.0798	12.9944	6.21033	6.57848	6.71572	1.85452	8.10353e-16	3.07457e-14
	ENSMUSG00000022367	Has2	15	-	56665627	56694539	protein_coding	27.8903	32.087	29.0123	17.0145	16.7443	17.1312	1.74822	8.11524e-16	3.07457e-14
	ENSMUSG00000024940	Ltbp3	19	+	5740904	5758532	protein_coding	158.51	161.154	161.33	101.529	99.1404	87.2097	1.67075	8.36306e-16	3.16302e-14
	ENSMUSG00000029334	Prkg2	5	-	98929773	99037351	protein_coding	40.7201	47.2066	44.5528	12.3241	24.9803	25.4544	2.1104	8.65489e-16	3.26778e-14
	ENSMUSG00000075225	Ccdc162	10	-	41538846	41716634	protein_coding	0.823094	0.541463	1.24222	0.026787	0.041646	0.095632	13.5871	9.04463e-16	3.40908e-14
	ENSMUSG00000040711	Sh3pxd2b	11	+	32347820	32428173	protein_coding	42.9396	41.3707	43.267	26.2342	25.5666	26.1008	1.63743	1.11688e-15	4.20253e-14
	ENSMUSG00000063605	Ccdc102a	8	-	94902869	94918098	protein_coding	17.0912	18.0688	17.7911	9.34808	7.31435	8.0526	2.14108	1.1811e-15	4.43659e-14
	ENSMUSG00000056413	Adap1	5	-	139271876	139325622	protein_coding	3.47273	3.61946	3.09254	0.982793	1.10307	1.15425	3.12366	1.18531e-15	4.44481e-14
	ENSMUSG00000005583	Mef2c	13	+	83504034	83667080	protein_coding	0.095783	0.119044	0.083932	0	0	0	10.9586	1.23439e-15	4.62099e-14
	ENSMUSG00000037270	4932438A13Rik	3	+	36863104	37053033	protein_coding	11.0362	11.2045	11.8065	20.9747	19.211	19.0062	0.575416	1.31841e-15	4.92715e-14
	ENSMUSG00000022537	Tmem44	16	-	30511855	30550842	protein_coding	3.71341	3.27601	3.03914	0.905685	1.05553	1.188	3.16385	1.32549e-15	4.94521e-14
	ENSMUSG00000029084	Cd38	5	+	43868553	43912375	protein_coding	2.14134	1.87678	2.20862	0.657266	0.541935	0.624135	3.37593	1.37764e-15	5.13105e-14
	ENSMUSG00000032116	Stt3a	9	-	36729344	36767679	protein_coding	81.7772	77.0686	79.6158	117.343	123.314	121.184	0.659051	1.44257e-15	5.36384e-14
	ENSMUSG00000021256	Vash1	12	+	86678700	86692091	protein_coding	3.10476	2.3767	3.09529	0.589655	0.824726	0.792487	3.84768	1.57196e-15	5.83508e-14
	ENSMUSG00000092216	Gm19345	7	+	19852003	19858350	protein_coding	0.693762	0.790823	0.799194	0.034068	0	0	36.1144	1.63899e-15	6.07366e-14
	ENSMUSG00000016319	Slc25a5	X	+	36795651	36798807	protein_coding	247.286	249.55	239.263	376.264	378.917	398.275	0.638178	1.77911e-15	6.5818e-14
	ENSMUSG00000074731	Zfp345	2	-	150470991	150485091	protein_coding	1.35375	1.1354	1.23701	0.307512	0.27172	0.263338	4.30471	1.9229e-15	7.10181e-14
	ENSMUSG00000022338	Eny2	15	+	44428042	44438256	protein_coding	13.5972	13.0146	12.0911	22.1362	23.477	24.2692	0.55402	2.08069e-15	7.67171e-14
	ENSMUSG00000021699	Pde4d	13	+	108449948	109953461	protein_coding	4.72683	3.58603	4.39034	1.56117	1.17705	1.07976	3.30906	2.17195e-15	7.9948e-14
	ENSMUSG00000057346	Apol9a	15	-	77403789	77411135	protein_coding	20.3044	18.4312	20.3587	10.4341	9.4368	9.49188	2.01152	2.23874e-15	8.22689e-14
	ENSMUSG00000029385	Ccng2	5	+	93267257	93276231	protein_coding	35.2105	36.2815	37.1622	19.9733	20.8864	21.2293	1.74961	2.29376e-15	8.41506e-14
	ENSMUSG00000036513	Commd2	3	-	57644349	57651715	protein_coding	8.17703	6.57129	6.81078	13.571	15.113	14.8668	0.495381	2.32069e-15	8.49966e-14
	ENSMUSG00000036580	Spg20	3	+	55112108	55137322	protein_coding	15.16	17.1023	15.2299	26.1956	31.4807	27.5259	0.557562	2.3397e-15	8.55508e-14
	ENSMUSG00000027377	Mall	2	-	127704386	127729932	protein_coding	5.59563	5.42447	5.03235	11.8958	12.4158	11.0405	0.454536	2.36323e-15	8.62677e-14
	ENSMUSG00000039100	March6	15	-	31455891	31531053	protein_coding	19.4989	20.472	19.6022	31.9545	30.8886	32.6492	0.623971	2.42965e-15	8.85453e-14
	ENSMUSG00000020577	Tspan13	12	-	36014557	36042500	protein_coding	1.08251	0.862475	0.837929	0.14215	0.070772	0.034431	10.142	2.46024e-15	8.95121e-14
	ENSMUSG00000044807	Zfp354c	11	-	50811086	50827724	protein_coding	2.81837	2.31731	3.13837	0.863307	0.916338	0.898699	3.0661	2.49328e-15	9.05646e-14
	ENSMUSG00000034227	Foxj1	11	-	116330704	116335399	protein_coding	4.4816	4.35446	4.5123	1.75621	1.44808	1.32017	2.93742	2.67413e-15	9.69735e-14
	ENSMUSG00000047213	Ythdf3	3	+	16183212	16217037	protein_coding	22.0612	21.5568	21.2737	44.0124	33.5454	35.0064	0.576599	2.95388e-15	1.06942e-13
	ENSMUSG00000028010	Gar1	3	-	129824912	129831396	protein_coding	26.6717	24.3564	24.67	45.1448	48.0257	44.5685	0.549674	2.98542e-15	1.07907e-13
	ENSMUSG00000027663	Zmat3	3	-	32334792	32366014	protein_coding	4.95418	4.87696	5.3189	8.19053	8.73507	8.84317	0.588402	3.25262e-15	1.17372e-13
	ENSMUSG00000033213	AA467197	2	+	122636986	122641191	protein_coding	2.87344	2.35062	2.13077	0.332572	0.108785	0.252962	10.1955	3.29949e-15	1.18868e-13
	ENSMUSG00000029311	Hsd17b11	5	-	103989762	104021919	protein_coding	4.4826	4.98368	4.87978	1.48389	0.804919	1.15649	4.13664	3.33981e-15	1.20124e-13
	ENSMUSG00000033943	Mga	2	+	119897228	119969581	protein_coding	11.0769	11.9468	13.7194	5.90889	6.39428	7.09838	1.89244	3.64173e-15	1.30769e-13
	ENSMUSG00000001507	Itga3	11	-	95044474	95076801	protein_coding	429.178	416.457	420.689	271.026	263.751	246.504	1.62081	3.74969e-15	1.34427e-13
	ENSMUSG00000046318	Ccbe1	18	-	66045302	66302741	protein_coding	36.177	38.1409	37.8186	23.0103	22.7157	23.1415	1.62802	3.86072e-15	1.37976e-13
	ENSMUSG00000037940	Inpp4b	8	+	81342556	82127914	protein_coding	2.2637	3.1429	2.32398	4.99737	4.38412	4.18486	0.570784	3.86123e-15	1.37976e-13
	ENSMUSG00000037278	Tmem97	11	-	78541817	78550777	protein_coding	21.4109	20.7633	19.5337	35.759	37.0663	36.5394	0.564359	4.12586e-15	1.47194e-13
	ENSMUSG00000068749	Psma5	3	+	108256926	108279974	protein_coding	91.8298	95.3976	95.6793	146.367	148.587	150.724	0.634803	4.30659e-15	1.53393e-13
	ENSMUSG00000041920	Slc16a6	11	-	109450855	109473598	protein_coding	1.06223	0.966761	0.943228	3.10475	2.71067	3.02314	0.338524	4.41518e-15	1.56895e-13
	ENSMUSG00000057766	Ankrd29	18	-	12252362	12305797	protein_coding	0.507898	0.382844	0.34216	1.89676	2.02671	2.13582	0.207397	4.41918e-15	1.56895e-13
	ENSMUSG00000032175	Tyk2	9	-	21104068	21131243	protein_coding	16.0697	16.6163	16.3577	8.99563	10.0195	9.60337	1.71296	4.59459e-15	1.62742e-13
	ENSMUSG00000028068	Iqgap3	3	+	88081971	88121048	protein_coding	22.0694	21.1745	22.9407	35.5089	33.9916	34.3929	0.637148	4.59865e-15	1.62742e-13
	ENSMUSG00000010755	Cars	7	-	143557230	143600090	protein_coding	32.8623	33.2473	34.5651	55.6758	54.5184	53.1784	0.616298	5.07836e-15	1.7943e-13
	ENSMUSG00000006219	Fblim1	4	-	141576062	141606096	protein_coding	60.4469	56.6842	29.2717	15.1916	14.2026	12.7923	3.46862	5.14311e-15	1.81426e-13
	ENSMUSG00000027722	Spata5	3	+	37419896	37579096	protein_coding	6.30278	7.29688	5.95194	12.6271	12.0722	11.8173	0.535798	5.49772e-15	1.93625e-13
	ENSMUSG00000034640	Tiparp	3	+	65528410	65555518	protein_coding	13.7557	14.9667	14.9514	23.2895	24.7022	22.9485	0.615805	5.69671e-15	2.00313e-13
	ENSMUSG00000001416	Cct3	3	+	88297116	88321767	protein_coding	164.047	171.821	154.848	264.515	252.855	254.984	0.635365	5.84367e-15	2.05153e-13
	ENSMUSG00000023067	Cdkn1a	17	+	29090976	29100727	protein_coding	7.205	6.72262	6.52078	2.77751	2.27147	2.08233	2.85959	5.96051e-15	2.08921e-13
	ENSMUSG00000027668	Mfn1	3	+	32529465	32579239	protein_coding	14.5485	15.5816	16.7901	24.8905	24.7999	25.1656	0.626956	6.01221e-15	2.10399e-13
	ENSMUSG00000003559	As3mt	19	+	46707458	46741099	protein_coding	0	0	0	0.339141	0.4093	0.353199	0.0265102	6.05643e-15	2.1161e-13
	ENSMUSG00000054203	Ifi205	1	-	174011998	174031810	protein_coding	1.65835	2.04461	2.02076	0.454681	0.322874	0.286163	5.2607	6.32077e-15	2.20496e-13
	ENSMUSG00000002996	Hbp1	12	-	31926254	31950535	protein_coding	24.3727	27.7699	26.3552	15.1843	14.4358	14.7438	1.76889	6.77498e-15	2.35967e-13
	ENSMUSG00000059834	Sclt1	3	-	41626720	41742514	protein_coding	2.7081	2.64571	2.71743	6.42204	6.68763	6.47765	0.412964	6.91579e-15	2.4049e-13
	ENSMUSG00000059901	Adamts14	10	-	61197112	61273438	protein_coding	6.6543	7.17462	7.18205	3.76667	3.33014	3.29579	2.01878	7.04428e-15	2.44572e-13
	ENSMUSG00000027804	Ppid	3	+	79591342	79603650	protein_coding	51.865	48.3564	49.6324	86.0801	82.7969	89.4806	0.580074	7.17652e-15	2.48771e-13
	ENSMUSG00000061778	Mospd2	X	-	164936169	164980375	protein_coding	7.24524	7.80971	6.93641	15.6236	13.8753	13.9112	0.506936	7.61304e-15	2.63488e-13
	ENSMUSG00000069892	9930111J21Rik2	11	-	49015874	49051242	protein_coding	3.47048	3.63994	4.05095	1.60374	1.41136	1.63444	2.39155	7.62681e-15	2.6355e-13
	ENSMUSG00000073411	H2-D1	17	+	35262730	35267499	protein_coding	191.763	183.947	186.909	116.906	121.541	115.582	1.58914	7.69974e-15	2.65653e-13
	ENSMUSG00000000031	H19	7	-	142575529	142578143	lincRNA	0.824412	0.870173	1.87564	0.024602	0.104388	0	22.6443	7.79471e-15	2.68509e-13
	ENSMUSG00000052302	Tbc1d30	10	-	121263820	121351278	protein_coding	0.820502	1.03884	1.62712	0.232179	0.143067	0.125603	6.62422	7.89478e-15	2.71531e-13
	ENSMUSG00000098132	Rassf10	7	+	112953962	112957457	protein_coding	0.558916	0.708303	0.684006	0.04826	0.113881	0.095264	6.8935	8.11862e-15	2.78794e-13
	ENSMUSG00000032652	Crebl2	6	+	134830154	134858931	protein_coding	9.51616	9.95279	9.75704	5.29826	4.92018	5.06513	1.91046	8.52671e-15	2.92352e-13
	ENSMUSG00000039158	Akna	4	-	63367125	63403354	protein_coding	1.28931	1.30359	1.32642	0.106903	0.01018	0.123482	14.5966	8.62171e-15	2.95149e-13
	ENSMUSG00000032202	Rab27a	9	+	73044854	73097629	protein_coding	3.31018	3.46184	3.03383	7.1195	7.87476	7.01592	0.446269	8.84856e-15	3.02445e-13
	ENSMUSG00000055415	Atp10b	11	+	43149877	43262285	protein_coding	0.008791	0.032785	0.008352	0.242738	0.216839	0.232133	0.110748	9.47247e-15	3.23268e-13
	ENSMUSG00000046062	Ppp1r15b	1	+	133131143	133139783	protein_coding	26.7798	26.8248	26.4697	41.299	42.7052	42.3995	0.633568	9.97663e-15	3.39947e-13
	ENSMUSG00000001036	Epn2	11	-	61517249	61579687	protein_coding	24.5978	25.0778	23.5838	13.5595	12.1767	15.5682	1.77308	1.07068e-14	3.64263e-13
	ENSMUSG00000036825	Ssx2ip	3	+	146404642	146440144	protein_coding	12.6344	13.5554	13.0794	21.3718	21.8391	22.3965	0.598732	1.08004e-14	3.66881e-13
	ENSMUSG00000079620	Muc4	16	+	32735886	32782391	protein_coding	0.052317	0.136101	0.129003	0	0.004861	0	9.96589	1.08174e-14	3.6689e-13
	ENSMUSG00000025912	Mybl1	1	-	9667415	9700209	protein_coding	6.68286	7.82844	8.20322	3.37491	3.79938	4.3059	1.97603	1.36506e-14	4.61563e-13
	ENSMUSG00000057969	Sema3b	9	-	107597674	107609229	protein_coding	2.76151	2.43281	2.54727	0.465828	0.917555	0.796061	3.51744	1.3903e-14	4.69377e-13
	ENSMUSG00000035692	Isg15	4	-	156199424	156200818	protein_coding	16.0863	13.4056	14.9785	5.62514	5.26384	5.05204	2.78632	1.45174e-14	4.89369e-13
	ENSMUSG00000031284	Pak3	X	+	143518591	143797796	protein_coding	3.16598	3.72265	3.44368	5.97287	5.49167	5.88261	0.596318	1.49984e-14	5.0481e-13
	ENSMUSG00000027562	Car2	3	+	14886273	14900770	protein_coding	0.985046	0.647498	0.532272	0	0	0.056354	25.4165	1.54471e-14	5.19117e-13
	ENSMUSG00000021200	Asb2	12	-	103321142	103356001	protein_coding	2.33109	2.156	3.01909	0.740178	0.562844	0.420899	4.29676	1.57344e-14	5.27966e-13
	ENSMUSG00000028849	Map7d1	4	-	126232167	126256343	protein_coding	69.3544	67.0891	70.224	43.5885	43.8421	40.2994	1.61786	1.60958e-14	5.3927e-13
	ENSMUSG00000064215	Ifi27	12	+	103434211	103440239	protein_coding	58.8245	52.8174	59.0296	32.7363	32.1451	28.7775	1.822	1.62209e-14	5.42637e-13
	ENSMUSG00000046589	Lrrc8e	8	+	4226827	4237470	protein_coding	0.889827	1.02778	1.34694	0.164889	0.250672	0.219445	4.95416	1.63869e-14	5.47356e-13
	ENSMUSG00000025758	Plk4	3	+	40800019	40816883	protein_coding	14.6174	15.0987	17.7541	27.3733	34.4152	29.5779	0.519716	1.6644e-14	5.55103e-13
	ENSMUSG00000045103	Dmd	X	+	82948870	85206141	protein_coding	1.88453	2.07901	2.42689	0.407384	0.208661	0.026337	9.54878	1.69479e-14	5.64384e-13
	ENSMUSG00000002565	Scin	12	-	40059769	40134228	protein_coding	8.37806	8.17886	8.42564	3.85059	3.12966	3.95143	2.28182	1.71899e-14	5.71576e-13
	ENSMUSG00000020032	Nuak1	10	-	84370905	84440597	protein_coding	23.0028	22.4651	22.677	13.1119	13.7588	14.5458	1.64489	1.78624e-14	5.92752e-13
	ENSMUSG00000059447	Hadhb	5	+	30155248	30184593	protein_coding	25.6684	24.6883	25.0304	41.1891	40.2948	42.0937	0.610133	1.78806e-14	5.92752e-13
	ENSMUSG00000009145	Dqx1	6	+	83057844	83067318	protein_coding	3.30264	3.17483	3.81831	1.28221	1.17336	0.999955	2.96247	1.84752e-14	6.11543e-13
	ENSMUSG00000038065	Mturn	6	+	54681624	54703851	protein_coding	1.91878	2.03138	2.3059	0.733933	0.592736	0.727452	3.01617	2.00265e-14	6.61896e-13
	ENSMUSG00000037892	Pcdh18	3	-	49743296	49757325	protein_coding	0.809121	0.610598	0.573371	0.136571	0.14792	0.141114	4.44045	2.00951e-14	6.6317e-13
	ENSMUSG00000035954	Dock4	12	+	40445952	40846874	protein_coding	1.67511	2.315	2.10704	0.966289	0.832691	0.76055	2.36612	2.03922e-14	6.71966e-13
	ENSMUSG00000025041	Nt5c2	19	-	46883317	47015153	protein_coding	25.384	23.6237	22.7031	38.7368	39.0963	39.7225	0.610116	2.06543e-14	6.79587e-13
	ENSMUSG00000072623	Zfp9	6	-	118461950	118479320	protein_coding	4.03837	4.60645	4.40084	1.60051	1.75917	1.91552	2.46469	2.09104e-14	6.86985e-13
	ENSMUSG00000025747	Tyms	5	-	30058202	30073617	protein_coding	12.2889	11.1185	10.6581	24.819	18.46	17.8654	0.557349	2.17677e-14	7.14085e-13
	ENSMUSG00000057706	Mex3b	7	+	82867333	82871515	protein_coding	3.92543	4.09763	4.46084	1.68209	1.50906	1.19365	2.83453	2.21869e-14	7.26753e-13
	ENSMUSG00000024654	Asrgl1	19	-	9109868	9135636	protein_coding	4.21584	4.35553	4.35618	1.54699	1.77737	2.05452	2.39561	2.2581e-14	7.38563e-13
	ENSMUSG00000029153	Ociad2	5	-	73322199	73341028	protein_coding	1.07704	0.738536	1.07743	0.127055	0.149586	0.042186	8.37953	2.27561e-14	7.43185e-13
	ENSMUSG00000035390	Brsk1	7	+	4690604	4715997	protein_coding	4.22985	3.86078	4.14553	1.64802	1.72883	1.91914	2.30308	2.45497e-14	8.00575e-13
	ENSMUSG00000027405	Nop56	2	+	130274430	130279313	protein_coding	59.1525	72.1295	61.2415	106.589	100.008	107.586	0.612812	2.57835e-14	8.38866e-13
	ENSMUSG00000021947	Cryl1	14	-	57274993	57398529	protein_coding	3.79057	3.5278	3.71245	9.6745	9.6233	8.2076	0.401695	2.58001e-14	8.38866e-13
	ENSMUSG00000027800	Tm4sf1	3	-	57285611	57301988	protein_coding	45.0089	83.3282	78.3955	123.854	122.174	134.251	0.54367	2.62481e-14	8.52173e-13
	ENSMUSG00000020823	Sec14l1	11	+	117115168	117159268	protein_coding	44.6517	41.2425	41.4756	25.8501	27.3882	26.9499	1.58817	2.66336e-14	8.63415e-13
	ENSMUSG00000002020	Ltbp2	12	-	84783212	84876532	protein_coding	48.0728	47.6433	48.7388	32.0765	29.8607	27.8466	1.60872	2.90627e-14	9.40776e-13
	ENSMUSG00000028039	Efna3	3	-	89313899	89322965	protein_coding	2.96607	3.14058	2.9203	1.15022	0.851938	1.08311	2.90728	2.91969e-14	9.43732e-13
	ENSMUSG00000021662	Arhgef28	13	-	97899469	98206439	protein_coding	5.20094	5.58058	5.6488	2.51811	2.8773	2.68687	2.02906	2.97743e-14	9.60985e-13
	ENSMUSG00000025330	Padi4	4	-	140745865	140774236	protein_coding	114.032	118.538	117.175	73.2227	74.3443	71.4927	1.59649	3.02962e-14	9.76397e-13
	ENSMUSG00000003363	Pld3	7	-	27532000	27553218	protein_coding	12.0892	12.3668	11.3859	5.80066	5.86167	6.09454	2.01676	3.05569e-14	9.8336e-13
	ENSMUSG00000022636	Alcam	16	-	52248996	52454074	protein_coding	10.7454	10.6499	10.2438	5.97076	5.44383	6.0385	1.81141	3.09604e-14	9.9489e-13
	ENSMUSG00000051444	Bbs12	3	+	37312554	37321453	protein_coding	4.32925	4.41302	3.64387	8.64244	9.53308	9.73202	0.444425	3.3575e-14	1.07604e-12
	ENSMUSG00000001864	Aif1l	2	+	31950139	31973442	protein_coding	5.8695	4.19529	5.36927	10.9014	10.758	10.0765	0.486813	3.35835e-14	1.07604e-12
	ENSMUSG00000052776	Oas1a	5	-	120896256	120907521	protein_coding	4.85319	5.93295	5.25628	1.91869	1.92212	1.85902	2.80504	3.69171e-14	1.18113e-12
	ENSMUSG00000023110	Prmt5	14	-	54507187	54517525	protein_coding	30.7854	26.351	28.3449	46.4763	45.9402	47.2379	0.612175	3.71794e-14	1.1878e-12
	ENSMUSG00000031352	Hccs	X	-	169250193	169320372	protein_coding	4.64688	4.98155	4.08674	9.17585	10.2008	10.9595	0.452648	3.81331e-14	1.2165e-12
	ENSMUSG00000058997	Vwa8	14	+	78849052	79202310	protein_coding	6.99263	6.58828	5.58364	10.7601	10.6701	10.5326	0.599965	4.15962e-14	1.32506e-12
	ENSMUSG00000023004	Tuba1b	15	-	98931425	98934565	protein_coding	456.329	461.969	414.722	676.713	688.269	710.867	0.642162	4.22322e-14	1.34338e-12
	ENSMUSG00000032549	Rab6b	9	+	103111787	103185276	protein_coding	9.62622	9.44511	10.8336	5.70856	5.40503	5.36745	1.81303	4.33541e-14	1.37707e-12
	ENSMUSG00000055980	Irs1	1	-	82233101	82291416	protein_coding	2.84285	2.80063	2.82845	1.39136	1.14099	1.35782	2.16877	4.6768e-14	1.48337e-12
	ENSMUSG00000028051	Hcn3	3	-	89146074	89160196	protein_coding	0.268333	0.449461	0.349171	2.03294	1.59739	1.81105	0.200491	5.2096e-14	1.64998e-12
	ENSMUSG00000022205	Sub1	15	-	11981339	11996983	protein_coding	22.5487	22.0591	24.2951	34.9913	36.3894	38.8743	0.625043	6.11192e-14	1.93298e-12
	ENSMUSG00000038884	A230050P20Rik	9	+	20868642	20874307	protein_coding	2.41452	1.85829	1.891	4.25879	5.10374	4.93675	0.432249	6.28274e-14	1.98416e-12
	ENSMUSG00000001506	Col1a1	11	+	94936224	94953042	protein_coding	0.725653	0.936141	0.899505	0.179337	0.270528	0.342297	3.15181	6.44698e-14	2.03311e-12
	ENSMUSG00000001420	Tmem79	3	-	88328655	88336148	protein_coding	23.6044	23.3541	22.3118	36.2165	37.226	37.714	0.62328	6.45694e-14	2.03334e-12
	ENSMUSG00000000631	Myo18a	11	+	77763246	77865980	protein_coding	59.749	58.1118	60.3232	38.2005	37.2355	34.2416	1.62445	6.96268e-14	2.18946e-12
	ENSMUSG00000025185	Loxl4	19	-	42593982	42612813	protein_coding	22.3273	24.0498	21.6274	38.556	37.8678	33.7529	0.617335	7.09506e-14	2.22791e-12
	ENSMUSG00000046794	Ppp1r3b	8	+	35375739	35388139	protein_coding	0.215865	0.120795	0.097011	0	0	0	15.4557	7.28876e-14	2.28539e-12
	ENSMUSG00000074796	Slc4a11	2	-	130684113	130697519	protein_coding	13.4802	13.9646	13.4142	7.06761	7.66347	6.59145	1.91495	7.29887e-14	2.28539e-12
	ENSMUSG00000034667	Xpot	10	-	121587380	121626332	protein_coding	34.3818	35.7802	31.9371	53.0887	52.6486	55.3205	0.633996	7.49158e-14	2.3424e-12
	ENSMUSG00000048307	Ankrd46	15	-	36477668	36496820	protein_coding	27.7121	25.8527	26.8756	37.4638	38.249	46.3104	0.659306	7.7043e-14	2.40549e-12
	ENSMUSG00000022191	Drosha	15	+	12824815	12935291	protein_coding	21.5391	21.9147	22.6432	33.6155	34.5791	35.453	0.637814	7.76561e-14	2.4212e-12
	ENSMUSG00000027583	Zbtb46	2	-	181387762	181459426	protein_coding	2.95573	2.83782	2.65816	1.1818	1.18765	1.29835	2.29372	8.18532e-14	2.54845e-12
	ENSMUSG00000005410	Mcm5	8	+	75109569	75128439	protein_coding	78.3942	80.5418	79.5951	125.74	121.722	119.204	0.650569	8.27314e-14	2.57215e-12
	ENSMUSG00000049321	Zfp2	11	-	50898712	50916165	protein_coding	1.69253	1.61904	1.80086	0.322081	0.27531	0.445619	4.79253	8.73236e-14	2.7111e-12
	ENSMUSG00000039195	1110008P14Rik	2	-	32377097	32381938	protein_coding	20.2442	18.0966	17.0075	6.32698	7.85425	6.63617	2.65636	8.81894e-14	2.73412e-12
	ENSMUSG00000022369	Mtbp	15	+	55557408	55626423	protein_coding	20.0188	20.4643	19.881	29.905	31.8409	32.4121	0.641208	8.91129e-14	2.75886e-12
	ENSMUSG00000027968	Larp7	3	-	127536714	127553349	protein_coding	17.3105	18.8133	19.0393	29.0813	30.9998	33.2679	0.591065	9.12024e-14	2.81959e-12
	ENSMUSG00000020122	Egfr	11	+	16752203	16918158	protein_coding	0.869946	0.795203	0.829513	2.21777	1.83196	1.88689	0.423131	1.0092e-13	3.11564e-12
	ENSMUSG00000005779	Psmb4	3	-	94884093	94886961	protein_coding	120.18	112.266	115.01	174.611	187.132	178.509	0.643157	1.01519e-13	3.12974e-12
	ENSMUSG00000021125	Arg2	12	+	79130777	79156301	protein_coding	1.9284	2.1431	2.10963	0.574599	0.421531	0.363965	4.46813	1.19099e-13	3.66659e-12
	ENSMUSG00000016028	Celsr1	15	-	85898929	86033777	protein_coding	8.67045	7.93506	7.37782	5.03285	4.28582	4.56058	1.72643	1.22485e-13	3.76555e-12
	ENSMUSG00000008999	Bmp7	2	-	172868012	172940321	protein_coding	1.20598	1.35459	1.46467	0.44538	0.41969	0.355757	3.24205	1.31509e-13	4.03735e-12
	ENSMUSG00000037411	Serpine1	5	-	137061504	137072268	protein_coding	39.3248	35.6768	40.3082	22.0543	21.9945	24.1675	1.69005	1.33297e-13	4.08653e-12
	ENSMUSG00000039221	Rpl22l1	3	+	28805436	28807424	protein_coding	17.8282	17.2168	17.3458	34.2055	43.7634	35.3351	0.462534	1.37889e-13	4.22143e-12
	ENSMUSG00000043671	Dpy19l3	7	-	35685165	35754454	protein_coding	2.26832	2.22084	2.62921	1.13009	1.03677	1.04534	2.20479	1.45798e-13	4.45736e-12
	ENSMUSG00000024359	Hspa9	18	-	34937414	34954357	protein_coding	202.058	197.231	193.232	293.143	294.977	309.769	0.659916	1.51191e-13	4.61582e-12
	ENSMUSG00000015652	Steap1	5	-	5736317	5749326	protein_coding	15.2063	14.3017	12.8405	28.0556	25.482	27.5236	0.522603	1.58472e-13	4.83141e-12
	ENSMUSG00000024810	Il33	19	+	29925114	29960718	protein_coding	0.438666	0.552859	0.612424	0.065656	0.04304	0.026148	9.91209	1.59079e-13	4.84321e-12
	ENSMUSG00000017418	Arl5b	2	+	15049395	15082456	protein_coding	1.33385	2.58904	2.88	5.77555	6.05335	3.67774	0.439792	1.59424e-13	4.84701e-12
	ENSMUSG00000041649	Klf8	X	+	153237466	153396132	protein_coding	3.21558	3.05061	3.2659	1.10195	1.25173	1.41806	2.51519	1.64746e-13	5.00192e-12
	ENSMUSG00000022687	Boc	16	-	44485049	44558897	protein_coding	0.80848	0.798586	0.988492	0.153896	0.230148	0.104216	5.0661	1.75908e-13	5.33344e-12
	ENSMUSG00000039824	Myl6b	10	-	128494157	128498685	protein_coding	9.66775	9.24468	10.2002	3.56166	3.17401	3.85784	2.74322	1.78881e-13	5.41613e-12
	ENSMUSG00000022358	Fbxo32	15	-	58175879	58214932	protein_coding	9.92202	9.87808	9.6703	5.8211	5.7539	5.96599	1.67893	1.83693e-13	5.5542e-12
	ENSMUSG00000029832	Nfe2l3	6	+	51432670	51458768	protein_coding	5.1976	5.10783	6.15177	2.24052	2.20134	2.19797	2.47191	1.92569e-13	5.81458e-12
	ENSMUSG00000050931	Sgms2	3	-	131318985	131491411	protein_coding	42.7341	28.7516	43.3037	27.1755	25.9562	24.4758	1.47892	1.92919e-13	5.81717e-12
	ENSMUSG00000037646	Vps13b	15	+	35371160	35931229	protein_coding	6.10624	6.1684	6.49322	10.6635	9.40323	9.90475	0.626564	1.94033e-13	5.84275e-12
	ENSMUSG00000055538	Zcchc24	14	-	25711642	25769039	protein_coding	19.0742	18.3902	19.4504	11.6228	11.662	10.9113	1.66378	1.96338e-13	5.90409e-12
	ENSMUSG00000079009	Gm14139	2	+	150181755	150193279	protein_coding	0.208215	0.129056	0.104418	0.816108	1.19735	1.40525	0.136773	2.02799e-13	6.09005e-12
	ENSMUSG00000051236	Msrb3	10	-	120781096	120899101	protein_coding	9.45906	9.46277	9.1108	5.16819	5.15376	4.84441	1.84667	2.0413e-13	6.12167e-12
	ENSMUSG00000037820	Tgm2	2	-	158116402	158146436	protein_coding	80.3065	78.595	80.0271	51.6761	49.7444	50.2886	1.5748	2.10737e-13	6.31121e-12
	ENSMUSG00000005087	Cd44	2	-	102811141	102901665	protein_coding	129.794	133.472	139.829	89.7386	80.7329	85.1989	1.57655	2.21078e-13	6.61192e-12
	ENSMUSG00000000957	Mmp14	14	+	54431612	54445364	protein_coding	60.8174	67.7242	73.3552	98.6085	104.168	96.7619	0.674059	2.32713e-13	6.95045e-12
	ENSMUSG00000002319	Ipo4	14	-	55625400	55635957	protein_coding	15.7439	19.0565	14.5146	25.2026	23.1718	24.768	0.674366	2.34964e-13	7.00816e-12
	ENSMUSG00000004043	Stat5a	11	+	100859351	100885169	protein_coding	12.638	11.7105	12.7559	7.44665	6.53439	6.87266	1.77815	2.51285e-13	7.48481e-12
	ENSMUSG00000036565	Ttyh3	5	-	140620578	140649031	protein_coding	34.195	34.4396	36.13	21.1098	20.1957	20.9376	1.68282	2.59634e-13	7.72305e-12
	ENSMUSG00000102748	Pcdhgb2	18	+	37689828	37841873	protein_coding	0.058853	0.034263	0.020751	2.03593	6.25392	0.232141	0.0168226	2.68369e-13	7.9635e-12
	ENSMUSG00000028701	Lurap1	4	-	116132406	116151338	protein_coding	3.01549	2.73498	2.86821	1.1668	1.33433	1.06352	2.40599	2.68717e-13	7.9635e-12
	ENSMUSG00000049555	Tmie	9	-	110865711	110880113	protein_coding	12.0732	12.1245	12.4322	6.52403	5.87202	6.12674	1.97598	2.68803e-13	7.9635e-12
	ENSMUSG00000022100	Xpo7	14	-	70654246	70766628	protein_coding	14.0804	14.188	14.3654	19.1132	17.5057	19.4291	0.760794	2.75632e-13	8.15487e-12
	ENSMUSG00000037992	Rara	11	+	98927818	98974942	protein_coding	29.3651	30.6268	28.9982	19.5702	18.0622	18.7653	1.5776	3.30474e-13	9.76428e-12
	ENSMUSG00000041028	Ghitm	14	-	37120092	37135272	protein_coding	70.8492	64.1315	66.6908	120.828	119.524	106.452	0.581551	3.41824e-13	1.00861e-11
	ENSMUSG00000030621	Me3	7	+	89632392	89854359	protein_coding	1.03462	1.20723	0.945766	2.72688	2.99198	2.20527	0.404521	3.43336e-13	1.01172e-11
	ENSMUSG00000081137	BC022960	X	+	169368189	169370003	transcribed_processed_pseudogene	0.871342	0.821308	0.661301	0.094591	0.105949	0.024277	9.35554	3.61757e-13	1.06457e-11
	ENSMUSG00000096727	Psmb9	17	-	34181987	34187764	protein_coding	9.86107	9.61169	11.5886	3.66719	4.83378	3.8405	2.51315	3.70376e-13	1.08737e-11
	ENSMUSG00000068747	Sort1	3	+	108284082	108361511	protein_coding	0.461463	0.366851	0.564729	0.141178	0.083605	0.082647	4.2173	3.70492e-13	1.08737e-11
	ENSMUSG00000068739	Sars	3	-	108424865	108445209	protein_coding	66.0922	64.0956	67.6186	100.182	103.665	88.2881	0.677139	3.92044e-13	1.14909e-11
	ENSMUSG00000085272	Sbk3	7	-	4965260	4971168	protein_coding	0.327089	0.338562	0.503213	0	0.017398	0.039042	13.8693	3.97645e-13	1.16396e-11
	ENSMUSG00000028967	Errfi1	4	+	150853919	150868892	protein_coding	64.952	74.1945	61.9812	39.5721	40.5507	39.1252	1.68646	4.01884e-13	1.1748e-11
	ENSMUSG00000037419	Endod1	9	-	14353990	14381507	protein_coding	74.502	71.3303	71.9564	106.943	111.297	107.161	0.669324	4.1093e-13	1.19965e-11
	ENSMUSG00000082419	Gm11425	11	-	83027500	83027997	processed_pseudogene	3.26662	2.38743	3.03862	0.339919	0.509479	0.292527	7.44303	4.12097e-13	1.20147e-11
	ENSMUSG00000027782	Kpna4	3	-	69067149	69127113	protein_coding	36.8073	39.213	39.3423	58.6468	59.3779	60.9431	0.644659	4.18402e-13	1.21824e-11
	ENSMUSG00000037362	Ccn3	15	+	54745702	54754039	protein_coding	0.240359	0.255371	0.233888	0.019602	0	0	15.3143	4.93624e-13	1.43536e-11
	ENSMUSG00000024365	Cyp21a1	17	-	34801348	34804561	protein_coding	0.651528	0.360212	0.615061	0.023764	0.059495	0.032215	11.389	4.96853e-13	1.44284e-11
	ENSMUSG00000027714	Exosc9	3	+	36552606	36565727	protein_coding	13.0287	15.7063	15.4046	24.9176	26.9458	29.4002	0.543334	5.26149e-13	1.5259e-11
	ENSMUSG00000074652	Myh7b	2	+	155611212	155634307	protein_coding	2.14378	2.09096	2.85484	4.17559	3.95297	6.61948	0.481768	5.36444e-13	1.55371e-11
	ENSMUSG00000030623	Prss23os	7	+	89510007	89511873	antisense	0.244637	0.29034	0.225903	1.15768	1.49635	1.33001	0.197028	5.5481e-13	1.60479e-11
	ENSMUSG00000019853	Hebp2	10	-	18539498	18546076	protein_coding	8.94358	7.6848	9.41162	3.35567	3.97974	3.01458	2.51156	5.57416e-13	1.61022e-11
	ENSMUSG00000115483	Gm9732	14	+	43275036	43306011	protein_coding	5.9772	5.0233	6.53986	13.2516	13.5907	12.8665	0.442146	5.77954e-13	1.66736e-11
	ENSMUSG00000029552	Tes	6	+	17065149	17105828	protein_coding	71.9107	80.3154	82.4012	48.088	49.3834	48.7349	1.60464	5.83942e-13	1.68243e-11
	ENSMUSG00000028089	Chd1l	3	-	97560742	97610203	protein_coding	9.48287	8.51309	9.1051	15.1327	15.9566	15.3388	0.58399	5.93426e-13	1.70751e-11
	ENSMUSG00000054717	Hmgb2	8	+	57511907	57515999	protein_coding	137.756	141.61	134.251	201.885	205.99	228.233	0.650247	6.08813e-13	1.7495e-11
	ENSMUSG00000027706	Sec62	3	+	30792875	30821263	protein_coding	18.1977	20.4996	18.0036	29.0786	29.3957	29.5552	0.644234	6.3389e-13	1.81919e-11
	ENSMUSG00000001552	Jup	11	-	100368958	100397763	protein_coding	148.586	139.378	143.615	95.3674	94.6876	88.4184	1.54974	6.85204e-13	1.9639e-11
	ENSMUSG00000025469	Msx3	7	-	140046157	140049089	protein_coding	0	0.020313	0.024274	0.479586	0.277059	0.614388	0.0532371	7.07107e-13	2.02404e-11
	ENSMUSG00000040128	Pnrc1	4	-	33245423	33290163	protein_coding	49.5224	46.4474	46.8551	29.4153	28.3218	25.3737	1.71823	8.16139e-13	2.3331e-11
	ENSMUSG00000029833	Trim24	6	+	37870811	37966296	protein_coding	9.96907	11.2807	10.7477	5.41395	5.97932	5.54408	1.88759	8.27159e-13	2.36153e-11
	ENSMUSG00000058672	Tubb2a	13	-	34074274	34078007	protein_coding	78.5274	75.4864	77.996	48.3614	49.1643	47.2694	1.60221	8.43742e-13	2.40576e-11
	ENSMUSG00000044320	1700001O22Rik	2	-	30794769	30803661	protein_coding	0.709721	1.26267	1.02982	0.114566	0.130865	0.156534	7.01958	8.77213e-13	2.49796e-11
	ENSMUSG00000017639	Rab11fip4	11	+	79591212	79698023	protein_coding	7.79758	7.88768	7.61069	4.46531	3.91192	4.81747	1.76382	9.05997e-13	2.57659e-11
	ENSMUSG00000068551	Zfp467	6	-	48427697	48445825	protein_coding	0.309749	0.596108	0.332452	0.03108	0.015153	0	16.6373	9.32252e-13	2.64784e-11
	ENSMUSG00000022797	Tfrc	16	+	32608920	32632794	protein_coding	38.0416	45.4217	38.8211	61.9556	63.1266	68.2859	0.632449	9.59677e-13	2.72222e-11
	ENSMUSG00000029371	Cxcl5	5	+	90759360	90761624	protein_coding	240.86	234.75	231.502	340.339	354.767	361.136	0.66947	9.88396e-13	2.80007e-11
	ENSMUSG00000021748	Pdhb	14	-	8165996	8173025	protein_coding	39.6157	42.5112	41.1139	64.1175	63.0199	68.4322	0.63022	1.00139e-12	2.83324e-11
	ENSMUSG00000055044	Pdlim1	19	-	40221173	40271842	protein_coding	2.05116	1.98545	1.6718	0.567203	0.44395	0.604252	3.48754	1.05314e-12	2.97583e-11
	ENSMUSG00000074146	4930579C12Rik	9	-	89113111	89177887	lincRNA	0.147277	0.12205	0.107223	0	0	0	13.5517	1.07055e-12	3.02116e-11
	ENSMUSG00000047181	Samd14	11	+	95009879	95026087	protein_coding	5.07843	4.76045	4.86698	2.13877	1.69623	1.83173	2.58672	1.10275e-12	3.10804e-11
	ENSMUSG00000026127	Imp4	1	+	34439851	34449356	protein_coding	9.75587	9.6835	9.40883	14.9402	14.9865	14.5475	0.648887	1.12367e-12	3.16296e-11
	ENSMUSG00000028763	Hspg2	4	+	137468769	137570630	protein_coding	86.6533	80.6903	86.4923	57.4493	53.2659	52.9033	1.55129	1.14344e-12	3.21395e-11
	ENSMUSG00000054555	Adam12	7	-	133883199	134232146	protein_coding	9.35795	9.38036	9.2837	15.2873	14.4372	14.7322	0.630571	1.14471e-12	3.21395e-11
	ENSMUSG00000027612	Mmp24	2	+	155775342	155818366	protein_coding	1.24116	1.27721	1.06833	0.296173	0.18735	0.379	4.05222	1.24035e-12	3.47804e-11
	ENSMUSG00000030613	Ccdc90b	7	+	92561149	92582294	protein_coding	3.75045	3.53463	3.40297	0.422733	0.861293	0.978208	4.67581	1.33868e-12	3.74897e-11
	ENSMUSG00000050721	Plekho2	9	-	65552698	65580040	protein_coding	4.87574	4.90133	4.91078	2.30882	1.70668	2.01146	2.42991	1.37336e-12	3.84123e-11
	ENSMUSG00000036111	Lmo1	7	-	109138572	109175207	protein_coding	3.00081	3.35464	3.47937	0.588128	0.467255	0.980837	4.77433	1.49653e-12	4.1804e-11
	ENSMUSG00000037531	Mrpl47	3	-	32725397	32737605	protein_coding	2.03839	2.07589	2.03575	4.37864	5.48912	4.24327	0.437028	1.52726e-12	4.26086e-11
	ENSMUSG00000032531	Amotl2	9	+	102716672	102733418	protein_coding	26.8856	27.3884	25.9514	39.7517	40.4688	40.0689	0.66702	1.53849e-12	4.28673e-11
	ENSMUSG00000029330	Cds1	5	+	101765130	101823858	protein_coding	2.33864	2.24574	2.20974	0.84779	0.887847	0.928632	2.53283	1.67951e-12	4.67374e-11
	ENSMUSG00000029019	Nppb	4	+	147985788	147987205	protein_coding	6.69619	6.65109	6.16978	1.27912	2.23029	1.31251	4.02873	1.82917e-12	5.08341e-11
	ENSMUSG00000037005	Xpnpep2	X	+	48108725	48136981	protein_coding	0.819027	1.35932	1.35213	3.25375	3.92045	3.46963	0.333571	1.83134e-12	5.08341e-11
	ENSMUSG00000004665	Cnn2	10	+	79988584	79996062	protein_coding	146.217	124.076	127.061	80.4522	81.8156	93.3794	1.55424	1.84852e-12	5.12463e-11
	ENSMUSG00000060275	Nrg2	18	-	36017652	36197380	protein_coding	0.979894	0.794224	1.03918	0.252855	0.210131	0.239364	3.88243	1.90047e-12	5.26203e-11
	ENSMUSG00000032606	Nicn1	9	+	108290429	108296498	protein_coding	13.7718	12.8592	13.3385	6.9753	6.58307	7.18139	1.92585	1.93803e-12	5.35811e-11
	ENSMUSG00000020422	Tns3	11	-	8431652	8664535	protein_coding	55.4102	51.9723	53.4437	77.1383	74.369	73.0327	0.716285	1.94193e-12	5.35811e-11
	ENSMUSG00000031441	Atp11a	8	+	12757014	12868728	protein_coding	63.2611	65.2691	68.9412	44.1975	41.3504	38.3259	1.59399	1.94247e-12	5.35811e-11
	ENSMUSG00000027531	Impa1	3	-	10311956	10331439	protein_coding	9.87499	10.1416	12.8878	18.4217	19.1946	18.5459	0.586103	1.981e-12	5.45754e-11
	ENSMUSG00000032875	Arhgef17	7	-	100869752	100932107	protein_coding	11.7585	11.1258	11.2883	7.02255	6.92085	6.76204	1.64948	2.02529e-12	5.57259e-11
	ENSMUSG00000039031	Arhgap18	10	+	26753421	26918648	protein_coding	14.1194	15.0702	14.1502	9.09369	7.3569	7.13541	1.83646	2.06372e-12	5.67125e-11
	ENSMUSG00000056632	Dsg3	18	+	20510274	20547459	protein_coding	0.765355	1.2107	1.01441	0.254609	0.321167	0.256749	3.50189	2.14576e-12	5.88933e-11
	ENSMUSG00000024593	Megf10	18	+	57133090	57297467	protein_coding	1.04965	1.13881	1.1258	0.330469	0.42748	0.249058	3.22492	2.15168e-12	5.89823e-11
	ENSMUSG00000024066	Xdh	17	-	73883895	73950196	protein_coding	0.221866	0.190683	0.119223	1.10585	0.569085	0.82015	0.222476	2.25954e-12	6.18424e-11
	ENSMUSG00000063354	Slc39a4	15	-	76612383	76617384	protein_coding	38.5211	36.4257	36.8734	22.7493	22.1174	22.6393	1.65616	2.26164e-12	6.18424e-11
	ENSMUSG00000060176	Kif27	13	-	58287502	58359122	protein_coding	0.381837	0.216609	0.431059	0.032946	0.010637	0.038307	9.46917	2.30113e-12	6.28443e-11
	ENSMUSG00000097960	A330074K22Rik	8	-	120204434	120228230	lincRNA	10.628	9.13152	9.91438	5.15016	4.72515	4.24918	2.09855	2.4412e-12	6.6587e-11
	ENSMUSG00000020238	Ncln	10	-	81486249	81496392	protein_coding	27.7039	27.3397	26.7655	42.3308	42.6413	46.3588	0.62301	2.64459e-12	7.20454e-11
	ENSMUSG00000019487	Trip10	17	+	57249455	57263665	protein_coding	48.2233	48.4957	50.4941	29.7009	31.6616	29.0358	1.62829	2.69349e-12	7.3287e-11
	ENSMUSG00000032329	Hmg20a	9	+	56418609	56496936	protein_coding	22.9261	24.8923	21.7419	14.0898	14.46	14.7919	1.60451	2.75266e-12	7.48045e-11
	ENSMUSG00000028066	Pmf1	3	-	88394143	88410331	protein_coding	30.2556	29.2122	26.8884	48.5905	51.8427	46.2307	0.588887	2.79211e-12	7.57828e-11
	ENSMUSG00000027677	Ttc14	3	+	33799832	33814860	protein_coding	3.97625	5.49855	4.86071	11.1552	10.1662	10.6284	0.449206	2.86877e-12	7.77676e-11
	ENSMUSG00000042506	Usp22	11	-	61151785	61175055	protein_coding	73.0608	70.757	72.6139	46.9761	47.9351	46.4724	1.5307	2.88393e-12	7.80825e-11
	ENSMUSG00000026234	Ncl	1	-	86344719	86359400	protein_coding	145.145	164.106	152.222	222.699	219.871	236.636	0.679444	3.06578e-12	8.29041e-11
	ENSMUSG00000047777	Phf13	4	-	151989633	151996258	protein_coding	17.6394	17.7188	19.3643	10.7321	10.6721	11.0253	1.68679	3.07771e-12	8.31245e-11
	ENSMUSG00000027684	Mecom	3	-	29951296	30548008	protein_coding	3.84909	4.39743	4.0294	1.98418	1.71041	1.92412	2.17854	3.09393e-12	8.34602e-11
	ENSMUSG00000029915	Clec5a	6	-	40574894	40585821	protein_coding	0.111929	0.104589	0.152563	0	0	0	13.3027	3.11492e-12	8.39237e-11
	ENSMUSG00000016386	Mpped2	2	+	106693269	106868356	protein_coding	0.238971	0.194743	0.276309	0	0.019255	0	15.0243	3.124e-12	8.40655e-11
	ENSMUSG00000027933	Ints3	3	-	90391388	90433622	protein_coding	18.1757	19.2664	18.8082	29.313	27.9953	27.828	0.660828	3.59125e-12	9.6521e-11
	ENSMUSG00000019843	Fyn	10	+	39368855	39565381	protein_coding	11.1138	11.5522	12.026	6.55821	6.32056	6.10323	1.82632	3.65996e-12	9.82476e-11
	ENSMUSG00000017692	Rhbdl3	11	+	80300912	80355955	protein_coding	1.42236	1.48538	1.52153	0.405867	0.381293	0.56327	3.23035	3.70736e-12	9.93989e-11
	ENSMUSG00000022141	Nipbl	15	-	8290617	8444463	protein_coding	17.7969	17.8646	18.2165	28.2894	26.0503	26.6191	0.665623	3.74502e-12	1.00286e-10
	ENSMUSG00000049719	Prss46	9	+	110844506	110856522	protein_coding	1.14912	1.25069	1.1079	0.18955	0.244616	0.137324	5.88158	3.93525e-12	1.05252e-10
	ENSMUSG00000034171	Faah	4	-	115967145	116017926	protein_coding	12.1922	11.3105	14.4155	6.47858	6.84802	7.91819	1.78372	4.03799e-12	1.07869e-10
	ENSMUSG00000040111	Gramd1b	9	-	40293233	40531383	protein_coding	0.547079	0.805969	0.494407	0.026212	0.061689	0.097334	8.72281	4.06381e-12	1.08427e-10
	ENSMUSG00000041515	Irf8	8	+	120736358	120756694	protein_coding	3.23403	2.92234	2.77733	1.15058	1.02649	0.715836	3.06671	4.28673e-12	1.14237e-10
	ENSMUSG00000020886	Dlg4	11	+	70016942	70047522	protein_coding	6.03599	5.54554	5.55776	2.03538	2.06618	2.4931	2.59172	4.44197e-12	1.18231e-10
	ENSMUSG00000040269	Mrps28	3	-	8802146	8923918	protein_coding	12.9541	11.9643	10.4399	23.9429	26.7479	24.9054	0.467937	4.62603e-12	1.22981e-10
	ENSMUSG00000027810	Eif2a	3	+	58525821	58557501	protein_coding	42.8471	39.0578	43.4802	64.8678	63.9157	65.2705	0.64619	4.65488e-12	1.23598e-10
	ENSMUSG00000027314	Dll4	2	+	119325784	119335962	protein_coding	1.99961	1.95089	1.67122	0.730186	0.573414	0.642829	2.85956	4.77445e-12	1.26621e-10
	ENSMUSG00000041220	Elovl6	3	+	129532355	129638495	protein_coding	10.8934	13.644	11.4237	19.0103	19.2506	20.1314	0.616051	4.79553e-12	1.27027e-10
	ENSMUSG00000030275	Etnk1	6	+	143167221	143232307	protein_coding	31.8957	34.4711	36.4692	21.2038	21.4773	22.5281	1.57675	4.94632e-12	1.30863e-10
	ENSMUSG00000086782	E130102H24Rik	4	-	101346531	101356735	lincRNA	0	0	0	0.58593	0.718248	0.488517	0.0164591	5.27402e-12	1.39366e-10
	ENSMUSG00000058135	Gstm1	3	-	108012255	108017973	protein_coding	9.23104	8.51188	8.90071	3.13634	4.09535	2.84158	2.6401	5.31213e-12	1.40103e-10
	ENSMUSG00000028096	Gpr89	3	-	96868281	96905346	protein_coding	5.71214	7.54485	7.37224	11.7639	10.8448	10.4485	0.624387	5.31466e-12	1.40103e-10
	ENSMUSG00000031403	Dkc1	X	+	75095854	75109777	protein_coding	30.0475	33.1752	29.7215	49.3774	45.646	49.4434	0.643434	5.46189e-12	1.43812e-10
	ENSMUSG00000115516	Gm8341	15	-	19454755	19456352	processed_pseudogene	3.96002	4.56314	4.72487	9.62234	9.8259	9.50023	0.458203	5.5875e-12	1.46944e-10
	ENSMUSG00000027447	Cst3	2	-	148871722	148875692	protein_coding	92.46	83.8155	89.1722	54.0933	54.8676	52.0285	1.64873	5.65045e-12	1.48422e-10
	ENSMUSG00000041959	S100a10	3	+	93555080	93564643	protein_coding	412.404	385.15	387.535	564.706	601.64	599.948	0.670952	5.68753e-12	1.49218e-10
	ENSMUSG00000053580	Tanc2	11	+	105589986	105929304	protein_coding	6.658	7.35188	7.69611	3.00429	2.12503	3.14636	2.617	5.71968e-12	1.49883e-10
	ENSMUSG00000045518	Onecut3	10	+	80494835	80517276	protein_coding	0.19493	0.432667	0.204083	0.023551	0.011482	0.027856	9.27645	5.73003e-12	1.49975e-10
	ENSMUSG00000021990	Spata13	14	+	60634001	60764556	protein_coding	5.96975	5.69359	6.17432	8.18869	9.69347	8.77398	0.669548	5.79312e-12	1.51447e-10
	ENSMUSG00000006442	Srm	4	+	148591503	148594993	protein_coding	30.5995	29.9323	29.4592	47.0711	46.4092	48.4008	0.634348	5.81321e-12	1.51792e-10
	ENSMUSG00000040354	Mars	10	-	127296221	127311786	protein_coding	44.7166	47.5669	44.0852	71.1948	70.0455	64.9652	0.661374	5.94248e-12	1.54983e-10
	ENSMUSG00000006418	Rnf114	2	+	167492645	167516173	protein_coding	32.7055	31.9346	33.1058	19.2638	19.9447	18.0143	1.70779	6.14263e-12	1.60014e-10
	ENSMUSG00000040483	Xaf1	11	+	72301629	72313733	protein_coding	6.33848	5.85783	6.22691	2.22846	1.90531	2.00266	2.99253	6.16265e-12	1.60114e-10
	ENSMUSG00000028480	Glipr2	4	+	43957401	43979118	protein_coding	18.6655	17.9205	20.091	10.8628	11.1829	10.5442	1.73842	6.1647e-12	1.60114e-10
	ENSMUSG00000022324	Matn2	15	+	34306677	34436273	protein_coding	4.6524	4.13015	4.2675	8.49827	7.38267	8.6831	0.531838	6.16829e-12	1.60114e-10
	ENSMUSG00000041859	Mcm3	1	-	20802968	20820312	protein_coding	64.5866	64.8194	62.1845	92.7829	93.7639	97.532	0.674462	6.55548e-12	1.69964e-10
	ENSMUSG00000034422	Parp14	16	-	35832874	35871544	protein_coding	11.1235	11.4126	11.7101	7.18867	6.8705	7.31995	1.60101	6.61613e-12	1.71335e-10
	ENSMUSG00000037605	Adgrl3	5	+	81020138	81825133	protein_coding	2.76986	1.75608	1.4251	0.599345	0.462155	0.387346	4.0444	6.65336e-12	1.7201e-10
	ENSMUSG00000025321	Itgb8	12	-	119158022	119238802	protein_coding	0.050029	0.07995	0.082472	0	0	0	8.0817	6.65785e-12	1.7201e-10
	ENSMUSG00000000563	Atp5f1	3	-	105942698	105960099	protein_coding	79.655	79.2725	82.6697	114.602	140.074	123.116	0.639527	6.66806e-12	1.72072e-10
	ENSMUSG00000022912	Pros1	16	+	62854307	62929346	protein_coding	0.816372	0.451275	0.466356	0.051023	0.105479	0.060418	7.14403	6.74977e-12	1.73976e-10
	ENSMUSG00000058600	Rpl30	15	-	34440505	34443640	protein_coding	19.8357	23.5158	20.5477	40.4533	42.0249	35.4398	0.542012	6.79753e-12	1.74961e-10
	ENSMUSG00000022946	Dop1b	16	+	93711904	93810590	protein_coding	6.71128	6.66475	7.30595	4.44576	3.36648	3.70914	1.79303	6.80386e-12	1.74961e-10
	ENSMUSG00000039756	Dnttip2	3	+	122274388	122285271	protein_coding	20.0758	27.4329	26.5655	45.846	41.749	42.647	0.568842	6.88041e-12	1.76723e-10
	ENSMUSG00000022003	Slc25a30	14	-	75760117	75787037	protein_coding	44.5459	42.6202	45.1835	27.7247	28.1416	29.0332	1.5587	6.95094e-12	1.78326e-10
	ENSMUSG00000063060	Sox7	14	+	63943673	63950732	protein_coding	0.378511	0.302543	0.380917	0.055631	0.046433	0.020164	7.17326	7.01514e-12	1.79764e-10
	ENSMUSG00000020658	Efr3b	12	-	3962554	4038915	protein_coding	1.17077	0.976195	0.912999	0.590301	0.375779	0.364869	2.27045	7.11686e-12	1.82158e-10
	ENSMUSG00000039197	Adk	14	+	21052574	21448569	protein_coding	21.1612	20.2374	19.1575	35.5153	33.4217	37.6598	0.568207	7.19641e-12	1.83981e-10
	ENSMUSG00000010095	Slc3a2	19	-	8706882	8723369	protein_coding	84.7777	92.2863	70.3617	128.88	149.128	136.897	0.596372	7.21416e-12	1.84221e-10
	ENSMUSG00000013089	Etv5	16	-	22381309	22439719	protein_coding	13.582	13.8627	12.5229	7.87324	8.19752	7.34719	1.7058	7.33854e-12	1.87066e-10
	ENSMUSG00000042396	Rbm7	9	-	48488701	48495299	protein_coding	20.62	18.2221	18.7682	8.20799	10.5113	9.37402	2.04956	7.34259e-12	1.87066e-10
	ENSMUSG00000025017	Pik3ap1	19	-	41272377	41385102	protein_coding	0.261442	0.285964	0.280121	0	0	0.029683	14.368	7.71296e-12	1.96275e-10
	ENSMUSG00000025232	Hexa	9	+	59539540	59565109	protein_coding	0	0	0	0.154592	0.398011	0.225732	0.0371133	7.7946e-12	1.98123e-10
	ENSMUSG00000032363	Adamts7	9	+	90163069	90208071	protein_coding	2.3776	2.26165	2.82208	1.04716	0.787331	0.825355	2.78504	7.83372e-12	1.98888e-10
	ENSMUSG00000049932	H2afx	9	+	44334694	44336077	protein_coding	59.8741	61.8051	58.6876	95.8314	99.0834	85.9517	0.642218	8.27442e-12	2.09835e-10
	ENSMUSG00000021952	Xpo4	14	-	57577521	57665430	protein_coding	10.0859	10.1977	10.5077	16.3139	16.1789	16.5061	0.628635	8.43802e-12	2.13737e-10
	ENSMUSG00000032135	Mcam	9	+	44134469	44142727	protein_coding	12.1026	10.966	11.9526	6.28358	5.5077	6.9032	1.87195	8.59899e-12	2.17564e-10
	ENSMUSG00000027901	Dennd2d	3	+	106482405	106503030	protein_coding	7.29175	7.89997	7.94442	12.857	11.3503	12.5202	0.630243	8.91398e-12	2.25275e-10
	ENSMUSG00000063727	Tnfrsf11b	15	-	54250619	54278484	protein_coding	0.169905	0.387341	0.375175	0	0	0.023605	17.9539	8.9929e-12	2.26913e-10
	ENSMUSG00000015533	Itga2	13	-	114833081	114932100	protein_coding	45.7717	47.7531	46.1076	31.3495	29.892	30.4704	1.52234	8.9994e-12	2.26913e-10
	ENSMUSG00000029298	Gbp9	5	-	105077630	105139539	protein_coding	5.40339	5.69512	5.91683	2.99062	2.96724	3.01836	1.89262	9.38239e-12	2.36299e-10
	ENSMUSG00000017002	Slpi	2	-	164354070	164389095	protein_coding	6.87252	6.631	6.62716	1.7852	2.06862	2.62158	3.09907	9.4341e-12	2.3733e-10
	ENSMUSG00000032898	Fbxo21	5	+	117976730	118010201	protein_coding	13.9019	13.733	14.2738	8.34093	8.6735	7.99595	1.67484	9.46994e-12	2.37959e-10
	ENSMUSG00000046814	Gchfr	2	+	119167773	119172390	protein_coding	4.51559	4.84569	3.02558	0.69347	0.417454	0.974936	5.86847	9.89744e-12	2.48418e-10
	ENSMUSG00000033105	Lss	10	+	76531588	76557138	protein_coding	5.88382	5.98423	6.27267	10.2745	10.198	9.42574	0.607143	9.93064e-12	2.48967e-10
	ENSMUSG00000038295	Atg9b	5	-	24384181	24392143	protein_coding	6.8999	6.45543	7.16242	12.8633	11.1409	10.9747	0.586929	1.0435e-11	2.61314e-10
	ENSMUSG00000051067	Lingo3	10	-	80832801	80844039	protein_coding	8.58094	8.27091	8.13824	13.7855	13.9056	12.946	0.615242	1.04611e-11	2.61671e-10
	ENSMUSG00000050821	Fam131a	16	+	20693241	20703048	protein_coding	2.11741	1.61047	1.3737	0.248687	0.067646	0.183499	9.6853	1.05863e-11	2.64197e-10
	ENSMUSG00000027890	Gstm4	3	-	108040408	108044894	protein_coding	0.140596	0.555152	0.595987	0	0	0	44.0578	1.05981e-11	2.64197e-10
	ENSMUSG00000040209	Zfp704	3	-	9427020	9610085	protein_coding	8.56691	8.63179	8.42117	12.4854	13.057	12.7694	0.668979	1.14161e-11	2.84265e-10
	ENSMUSG00000021893	Capn7	14	+	31336638	31371986	protein_coding	11.4082	10.8465	10.6194	17.1117	17.2321	16.4847	0.646973	1.1682e-11	2.90559e-10
	ENSMUSG00000031918	Mtmr2	9	+	13748410	13806481	protein_coding	95.1562	97.6483	95.4441	131.065	138.407	139.796	0.704324	1.26879e-11	3.15222e-10
	ENSMUSG00000008461	Fut1	7	+	45617289	45621059	protein_coding	1.12401	1.11041	1.09377	3.40957	3.03184	2.62435	0.369204	1.27599e-11	3.16652e-10
	ENSMUSG00000024601	Isoc1	18	+	58659466	58680368	protein_coding	15.4769	16.6096	17.4459	25.8555	25.8933	25.3872	0.642283	1.28623e-11	3.18835e-10
	ENSMUSG00000026229	Psmd1	1	+	86064387	86139151	protein_coding	80.9096	82.9816	79.2435	119.321	114.756	124.993	0.67715	1.32867e-11	3.28985e-10
	ENSMUSG00000029512	Ulk1	5	-	110784488	110810097	protein_coding	19.9758	19.8601	20.1755	12.3972	12.1622	13.1577	1.59062	1.3435e-11	3.32283e-10
	ENSMUSG00000022351	Sqle	15	+	59315077	59331192	protein_coding	35.2602	36.6549	35.5531	51.2194	54.6708	56.3427	0.662494	1.36134e-11	3.36316e-10
	ENSMUSG00000030827	Fgf21	7	-	45613886	45615490	protein_coding	0.441423	0.382654	0.359815	1.53105	1.86486	2.21383	0.215239	1.36949e-11	3.37704e-10
	ENSMUSG00000018774	Cd68	11	-	69664213	69666153	protein_coding	17.0373	15.7445	15.8589	8.17791	7.33282	7.67403	2.09654	1.37002e-11	3.37704e-10
	ENSMUSG00000040699	Limd2	11	-	106156256	106160860	protein_coding	15.2897	17.0782	16.7422	9.5527	7.6452	7.38978	1.99613	1.37402e-11	3.38311e-10
	ENSMUSG00000042724	Map3k9	12	-	81721010	81781175	protein_coding	9.0667	8.19359	8.41931	5.04024	4.26778	4.80385	1.81798	1.4e-11	3.44322e-10
	ENSMUSG00000054008	Ndst1	18	-	60684494	60748650	protein_coding	22.0873	22.2683	20.2028	31.6586	32.9778	31.1869	0.673826	1.42103e-11	3.49104e-10
	ENSMUSG00000087142	Gm12454	4	-	43504428	43508747	antisense	3.88054	4.09773	3.29093	1.09058	1.14831	0.836995	3.638	1.4432e-11	3.54155e-10
	ENSMUSG00000010660	Plcd1	9	-	119071527	119093502	protein_coding	9.3518	7.77536	10.1432	3.93141	4.75885	4.17473	2.11713	1.46153e-11	3.58253e-10
	ENSMUSG00000030551	Nr2f2	7	-	70351944	70366735	protein_coding	6.46948	8.08251	8.68904	15.3479	14.1661	13.4544	0.541207	1.47427e-11	3.60975e-10
	ENSMUSG00000038178	Slc43a2	11	+	75531694	75577575	protein_coding	7.55983	11.1348	11.6863	4.9926	4.38458	3.94447	2.27769	1.4964e-11	3.65987e-10
	ENSMUSG00000027665	Pik3ca	3	+	32397671	32468486	protein_coding	6.72274	7.0195	7.59015	11.3952	11.0649	10.7779	0.64213	1.53446e-11	3.74878e-10
	ENSMUSG00000032014	Oaf	9	-	43221235	43239911	protein_coding	22.7931	23.9808	22.847	13.9481	15.0011	12.2696	1.68856	1.56507e-11	3.81933e-10
	ENSMUSG00000041642	Kif21b	1	+	136131389	136177998	protein_coding	0.28314	0.250685	0.332344	0.856092	0.741655	0.943141	0.348583	1.57506e-11	3.83944e-10
	ENSMUSG00000022885	St6gal1	16	+	23224740	23360350	protein_coding	16.2808	15.9956	19.2034	10.3877	9.23891	9.87392	1.74429	1.5853e-11	3.85679e-10
	ENSMUSG00000020821	Kif1c	11	+	70700548	70731964	protein_coding	81.2331	81.5738	80.6812	55.2132	53.3171	53.2746	1.50473	1.58568e-11	3.85679e-10
	ENSMUSG00000025364	Pa2g4	10	-	128557766	128565987	protein_coding	118.187	121.14	117.708	170.089	174.093	176.304	0.685983	1.62476e-11	3.94748e-10
	ENSMUSG00000026880	Stom	2	-	35313986	35336976	protein_coding	35.4269	34.2051	33.756	22.3556	21.9179	21.2481	1.57766	1.63225e-11	3.96131e-10
	ENSMUSG00000020902	Ntn1	11	-	68209364	68400823	protein_coding	25.7148	23.3903	23.7704	16.02	15.5994	13.7865	1.60458	1.77633e-11	4.30624e-10
	ENSMUSG00000021665	Hexb	13	-	97176331	97198357	protein_coding	21.8514	21.6706	23.1609	12.2943	13.5022	12.8012	1.72707	1.83211e-11	4.43656e-10
	ENSMUSG00000026923	Notch1	2	-	26457903	26516663	protein_coding	24.0054	21.4639	22.7779	15.0321	14.109	15.1131	1.5418	1.87645e-11	4.53894e-10
	ENSMUSG00000031595	Pdgfrl	8	+	40926212	40990785	protein_coding	2.63602	2.93476	2.42998	0.806598	0.680281	0.911456	3.30711	1.95129e-11	4.71156e-10
	ENSMUSG00000112941	Gm48623	13	+	54301959	54312797	lincRNA	0	0	0	0.872232	1.27259	0.601989	0.0108038	1.95209e-11	4.71156e-10
	ENSMUSG00000021811	Dnajc9	14	-	20384638	20388910	protein_coding	21.6686	20.8519	19.5628	34.7901	36.1223	33.6294	0.593978	2.03916e-11	4.91631e-10
	ENSMUSG00000024511	Rab27b	18	-	69979131	70141605	protein_coding	3.1596	3.15914	3.22679	6.39571	5.85697	6.29303	0.515487	2.08561e-11	5.02281e-10
	ENSMUSG00000064325	Hhip	8	-	79965851	80058006	protein_coding	0.467791	0.285984	0.367986	0.043385	0.048339	0.071334	5.96588	2.11285e-11	5.08285e-10
	ENSMUSG00000038729	Akap2	4	+	57717657	57896984	protein_coding	28.6492	26.1061	26.8513	16.7444	17.9423	16.2243	1.60257	2.12416e-11	5.10449e-10
	ENSMUSG00000028268	Gbp3	3	+	142560026	142573209	protein_coding	5.25107	4.92822	4.40187	2.22317	1.9933	2.04929	2.32079	2.28134e-11	5.47621e-10
	ENSMUSG00000061119	Prcp	7	+	92874470	92934583	protein_coding	10.6197	10.381	10.9883	4.49037	4.9859	6.17149	2.04232	2.46988e-11	5.92233e-10
	ENSMUSG00000022329	Stk3	15	-	34875496	35178921	protein_coding	14.5798	15.6496	15.9584	23.8401	23.468	24.8445	0.64029	2.51055e-11	6.0133e-10
	ENSMUSG00000003355	Fkbp11	15	-	98724366	98728198	protein_coding	5.51479	5.37716	4.96933	13.8851	11.5201	12.4496	0.419463	2.62867e-11	6.28937e-10
	ENSMUSG00000001436	Slc19a1	10	+	77032241	77061002	protein_coding	7.57814	9.26328	9.13398	15.2116	15.1975	15.7152	0.563445	2.69017e-11	6.42954e-10
	ENSMUSG00000028328	Tmod1	4	+	46038935	46116032	protein_coding	0.4062	0.37359	0.288423	0.014391	0.021653	0.063051	8.50701	2.82897e-11	6.75394e-10
	ENSMUSG00000041737	Tmem45b	9	-	31426196	31464462	protein_coding	0.375455	0.361721	0.317273	0	0	0.036976	16.1916	2.84698e-11	6.78958e-10
	ENSMUSG00000027944	Hax1	3	-	89995446	89998780	protein_coding	22.315	26.2154	18.168	37.5762	49.9526	44.9001	0.503767	2.85393e-11	6.79878e-10
	ENSMUSG00000035504	Reep6	10	+	80329953	80336441	protein_coding	2.98193	2.41664	2.50987	7.61476	5.66236	5.98422	0.411503	3.04024e-11	7.23479e-10
	ENSMUSG00000039942	Ptger4	15	-	5206661	5244187	protein_coding	0.853807	0.814895	0.984913	0.22019	0.26316	0.264938	3.4481	3.06297e-11	7.281e-10
	ENSMUSG00000022200	Golph3	15	+	12321450	12351591	protein_coding	56.4849	59.5406	59.817	82.1704	81.0926	85.3061	0.707454	3.09493e-11	7.34904e-10
	ENSMUSG00000032883	Acsl3	1	+	78657825	78707743	protein_coding	26.2342	30.0312	29.5853	44.7489	39.851	45.1782	0.661597	3.10867e-11	7.3737e-10
	ENSMUSG00000023087	Noct	3	+	51224447	51251644	protein_coding	7.17705	6.95158	7.22993	10.5932	10.7639	11.15	0.657359	3.19674e-11	7.57445e-10
	ENSMUSG00000004885	Crabp2	3	+	87948666	87953376	protein_coding	2.96233	2.1848	1.93041	0.52232	0.540041	0.512314	4.42927	3.31508e-11	7.84641e-10
	ENSMUSG00000025980	Hspd1	1	-	55077835	55088243	protein_coding	327.822	336.91	328.363	474.913	467.422	498.917	0.689057	3.77618e-11	8.91995e-10
	ENSMUSG00000032285	Dnaja4	9	+	54698873	54716315	protein_coding	10.1744	10.5201	9.84913	5.5396	5.85436	5.38513	1.81887	3.77676e-11	8.91995e-10
	ENSMUSG00000015305	Sash1	10	-	8722219	8886070	protein_coding	12.4744	13.1265	13.805	8.70636	8.28997	7.84391	1.58567	3.80638e-11	8.98029e-10
	ENSMUSG00000004044	Cavin1	11	-	100956733	100970887	protein_coding	166.151	154.59	160.344	105.217	110.163	105.257	1.50036	3.93328e-11	9.26973e-10
	ENSMUSG00000028893	Sesn2	4	-	132492032	132510501	protein_coding	2.49642	2.67918	3.02202	5.52049	6.26645	5.21585	0.483046	4.04225e-11	9.51636e-10
	ENSMUSG00000042354	Gnl3	14	-	31012433	31019152	protein_coding	24.0747	24.1591	23.2904	40.4931	43.0799	38.4186	0.586406	4.05558e-11	9.53755e-10
	ENSMUSG00000027544	Nfatc2	2	-	168476410	168601657	protein_coding	3.75778	3.13739	3.53058	6.28921	6.16534	5.95208	0.567118	4.25827e-11	1.00035e-09
	ENSMUSG00000040520	Manea	4	-	26324506	26346891	protein_coding	15.4597	14.8839	11.7955	7.66962	8.22714	7.88975	1.77058	4.40801e-11	1.03442e-09
	ENSMUSG00000027777	Schip1	3	+	68064802	68626481	protein_coding	14.1417	13.1853	12.4553	24.8745	24.1662	19.6831	0.579056	4.72887e-11	1.10854e-09
	ENSMUSG00000042350	Arel1	12	-	84918148	84970900	protein_coding	18.8152	18.0164	19.2567	12.4155	11.5849	12.1935	1.54921	4.79335e-11	1.12246e-09
	ENSMUSG00000020866	Cacna1g	11	-	94408391	94474198	protein_coding	0.516919	0.331695	0.260422	0.016772	0.150696	0	5.76821	4.86272e-11	1.13749e-09
	ENSMUSG00000026563	Tada1	1	+	166379097	166393621	protein_coding	7.0584	8.53923	8.5882	16.3731	13.5142	14.9446	0.539786	4.94957e-11	1.15658e-09
	ENSMUSG00000048644	Ctxn1	8	-	4257660	4259274	protein_coding	42.7068	41.055	39.6715	25.0913	25.7012	22.9142	1.67438	5.00582e-11	1.16849e-09
	ENSMUSG00000015749	Anp32e	3	+	95929246	95947390	protein_coding	63.9163	45.9775	67.0485	125.623	123.626	134.922	0.460624	5.01922e-11	1.17037e-09
	ENSMUSG00000053604	Rpia	6	-	70765720	70792232	protein_coding	34.5898	33.3471	32.3309	21.1162	20.3127	20.7723	1.6117	5.0408e-11	1.17416e-09
	ENSMUSG00000038319	Kcnh2	5	-	24319589	24351604	protein_coding	0.439906	0.357369	0.284917	0.039519	0	0.019801	12.4518	5.09236e-11	1.18492e-09
	ENSMUSG00000026020	Nop58	1	+	59684971	59719044	protein_coding	27.7704	41.5522	39.0661	46.1278	60.0978	65.965	0.629534	5.1791e-11	1.20272e-09
	ENSMUSG00000024665	Fads2	19	-	10062765	10101746	protein_coding	45.2469	44.2812	43.1763	65.9462	62.5488	66.6047	0.680237	5.17981e-11	1.20272e-09
	ENSMUSG00000024516	Sec11c	18	+	65800515	65817684	protein_coding	18.6024	18.6164	22.807	36.0894	32.5087	37.0529	0.568274	5.33179e-11	1.23671e-09
	ENSMUSG00000015176	Nolc1	19	+	46075863	46085530	protein_coding	66.2322	70.4391	62.3997	97.9555	102.892	106.312	0.648137	5.42755e-11	1.25759e-09
	ENSMUSG00000023169	Slc38a1	15	-	96571418	96642913	protein_coding	18.9929	18.8017	18.539	26.9786	26.8168	26.3075	0.703377	5.52724e-11	1.27934e-09
	ENSMUSG00000020669	Sh3yl1	12	+	30911668	30960162	protein_coding	3.6915	3.84223	4.50412	1.59362	2.04018	1.77897	2.21723	5.62355e-11	1.30027e-09
	ENSMUSG00000034459	Ifit1	19	+	34640871	34650009	protein_coding	3.0053	2.99171	3.33182	1.36158	1.17386	1.00681	2.61987	5.80729e-11	1.34134e-09
	ENSMUSG00000027864	Ptgfrn	3	-	101040232	101110278	protein_coding	69.6157	69.4639	69.0734	101.862	102.209	95.9771	0.693763	5.84757e-11	1.34923e-09
	ENSMUSG00000002603	Tgfb1	7	+	25687002	25705077	protein_coding	26.1585	24.504	26.957	15.9325	17.1125	14.3191	1.63838	6.28849e-11	1.44945e-09
	ENSMUSG00000068922	Msto1	3	-	88905107	88913999	protein_coding	22.5476	17.9977	17.7013	30.551	30.0477	32.647	0.624778	6.33213e-11	1.45798e-09
	ENSMUSG00000078920	Ifi47	11	+	49076587	49096974	protein_coding	7.98758	8.26639	8.9161	3.27264	2.99781	4.06816	2.43042	6.54592e-11	1.50563e-09
	ENSMUSG00000066152	Slc31a2	4	+	62262562	62298411	protein_coding	10.744	10.3195	9.17368	4.19815	4.76645	5.06464	2.15283	6.83586e-11	1.57068e-09
	ENSMUSG00000017499	Cdc6	11	+	98907801	98923940	protein_coding	6.62387	6.47276	6.52643	10.1688	10.0145	14.7714	0.561762	6.89311e-11	1.58218e-09
	ENSMUSG00000032177	Pde4a	9	+	21165714	21213248	protein_coding	11.2298	11.3302	11.8556	7.55864	7.56014	6.3614	1.60136	7.01847e-11	1.60928e-09
	ENSMUSG00000027787	Nmd3	3	+	69721985	69756373	protein_coding	4.92164	4.96776	7.3079	9.15638	14.4788	7.96172	0.544704	7.17073e-11	1.64248e-09
	ENSMUSG00000006403	Adamts4	1	+	171250421	171260637	protein_coding	5.98242	5.27607	5.95447	2.98347	3.1312	2.59	1.97408	7.26124e-11	1.66103e-09
	ENSMUSG00000024556	Me2	18	-	73769903	73815449	protein_coding	23.1339	22.5554	20.5942	32.5223	34.3153	34.6449	0.653255	7.26683e-11	1.66103e-09
	ENSMUSG00000027669	Gnb4	3	-	32580332	32616585	protein_coding	2.34754	2.07819	2.27576	1.08611	1.1199	0.937457	2.12118	7.34023e-11	1.67607e-09
	ENSMUSG00000042644	Itpr3	17	+	27057304	27122223	protein_coding	78.5929	77.3491	79.5591	54.8045	52.0653	52.3105	1.47937	7.4909e-11	1.7087e-09
	ENSMUSG00000021211	Akr1c12	13	-	4268176	4279433	protein_coding	0.284849	0.299239	0.33576	0	0	0	31.6616	7.62776e-11	1.73812e-09
	ENSMUSG00000000296	Tpd52l1	10	-	31332376	31445958	protein_coding	18.0618	21.6738	18.8761	8.52773	9.19396	8.4066	2.2418	7.88689e-11	1.79531e-09
	ENSMUSG00000028041	Adam15	3	-	89338542	89349996	protein_coding	17.1098	15.1677	17.4975	24.8277	26.1404	26.261	0.644649	8.06216e-11	1.83331e-09
	ENSMUSG00000037851	Iars	13	+	49682100	49734267	protein_coding	59.4835	61.2558	58.619	87.3594	85.5933	87.7313	0.688065	8.33999e-11	1.89453e-09
	ENSMUSG00000027879	Sec22b	3	+	97901190	97923276	protein_coding	13.1463	13.0275	13.5157	20.1365	22.6	19.6485	0.636377	8.37257e-11	1.89997e-09
	ENSMUSG00000042364	Snx18	13	-	113592179	113618564	protein_coding	47.5214	46.486	46.1685	30.3814	31.2871	31.6713	1.50162	8.56353e-11	1.9413e-09
	ENSMUSG00000026434	Nucks1	1	+	131910534	131936321	protein_coding	85.7157	84.4726	85.7939	117.478	120.818	126.397	0.701936	8.59e-11	1.9453e-09
	ENSMUSG00000005481	Ddx39	8	+	83715177	83726892	protein_coding	47.3366	85.4672	50.671	117.024	84.815	123.55	0.563903	8.83451e-11	1.99861e-09
	ENSMUSG00000032113	Chek1	9	-	36708482	36727065	protein_coding	24.4891	29.8942	21.6287	42.397	37.3631	43.6844	0.615852	8.94029e-11	2.02047e-09
	ENSMUSG00000068758	Il3ra	14	+	14346275	14356011	protein_coding	0.943809	0.805227	0.42604	0.055484	0.187173	0.088252	6.10978	9.28121e-11	2.09537e-09
	ENSMUSG00000062580	Timm17a	1	-	135295213	135313778	protein_coding	4.63162	4.43109	4.54619	6.96434	7.08753	6.96378	0.648063	9.422e-11	2.12497e-09
	ENSMUSG00000042010	Acacb	5	+	114146535	114250761	protein_coding	2.57548	3.14828	3.99452	1.87899	1.26144	1.46435	2.10329	9.70855e-11	2.18736e-09
	ENSMUSG00000037643	Prkci	3	+	30995747	31052959	protein_coding	39.9721	40.7501	40.7859	57.0145	58.8385	59.0487	0.694775	1.02733e-10	2.31223e-09
	ENSMUSG00000025762	Larp1b	3	+	40949828	41040234	protein_coding	8.3552	6.95844	6.99985	12.2638	13.9391	13.5588	0.561511	1.05026e-10	2.36143e-09
	ENSMUSG00000024841	Eif1ad	19	+	5366741	5371526	protein_coding	13.4531	13.368	11.6342	20.8875	20.2635	21.4277	0.614696	1.06925e-10	2.40166e-09
	ENSMUSG00000019230	Lhx9	1	-	138825186	138848577	protein_coding	0.163022	0.133029	0.194593	0	0	0.018189	10.8042	1.08783e-10	2.44092e-09
	ENSMUSG00000028654	Mycl	4	+	122995652	123002485	protein_coding	10.3982	10.0883	9.93941	5.58876	5.31593	6.10691	1.78715	1.12771e-10	2.52782e-09
	ENSMUSG00000034664	Itga2b	11	-	102453297	102470122	protein_coding	2.10311	1.29068	1.57191	0.524871	0.487378	0.937598	2.52328	1.13e-10	2.53038e-09
	ENSMUSG00000046709	Mapk10	5	-	102907948	103211334	protein_coding	0.045856	0.08687	0.075994	0	0	0	7.95733	1.16079e-10	2.59667e-09
	ENSMUSG00000021892	Sh3bp5	14	-	31359880	31436078	protein_coding	9.70014	9.29539	10.5606	15.877	16.4268	15.8295	0.614288	1.16393e-10	2.60107e-09
	ENSMUSG00000026618	Iars2	1	-	185284726	185329396	protein_coding	24.6036	24.0369	25.3717	34.0703	35.3038	35.1471	0.708191	1.22581e-10	2.73656e-09
	ENSMUSG00000048039	Isg20l2	3	+	87930314	87940686	protein_coding	17.1108	17.4158	17.8263	26.0897	26.3782	26.8631	0.660058	1.22991e-10	2.74294e-09
	ENSMUSG00000025150	Cbr2	11	-	120729489	120732114	protein_coding	33.7998	33.0261	33.9373	20.5646	19.238	19.4016	1.7016	1.30215e-10	2.9011e-09
	ENSMUSG00000075470	Alg10b	15	+	90224311	90233471	protein_coding	19.3361	19.6106	19.2824	27.5437	27.8217	28.9268	0.690911	1.34295e-10	2.98897e-09
	ENSMUSG00000022177	Haus4	14	-	54541785	54554616	protein_coding	17.3103	15.7797	15.9721	26.673	26.9594	25.6326	0.619107	1.35663e-10	3.01638e-09
	ENSMUSG00000021240	Abcd4	12	-	84601464	84617413	protein_coding	16.8634	20.2245	18.2166	11.3369	10.4244	9.56031	1.76497	1.37367e-10	3.05118e-09
	ENSMUSG00000016128	Stard13	5	-	151037510	151233836	protein_coding	13.46	13.1037	12.7258	8.29551	7.53962	8.25574	1.6301	1.46538e-10	3.2516e-09
	ENSMUSG00000002257	Def6	17	+	28207778	28228608	protein_coding	3.85026	3.96814	3.79409	8.30938	7.9089	6.981	0.501199	1.46708e-10	3.25211e-09
	ENSMUSG00000032766	Gng11	6	+	4003904	4008445	protein_coding	19.0872	19.5313	19.3133	7.26701	8.9184	10.038	2.20778	1.52097e-10	3.36816e-09
	ENSMUSG00000037552	Plekhg2	7	-	28359604	28372599	protein_coding	9.90207	10.2688	11.0632	6.85687	6.43019	6.42542	1.58359	1.5586e-10	3.44803e-09
	ENSMUSG00000036957	Lrfn3	7	-	30355489	30362772	protein_coding	1.36062	1.38579	1.16096	0.446677	0.441339	0.342433	3.12378	1.60357e-10	3.54396e-09
	ENSMUSG00000040785	Ttc3	16	+	94370618	94469343	protein_coding	34.1561	37.1084	37.5093	23.5292	19.558	21.5881	1.68153	1.67494e-10	3.69798e-09
	ENSMUSG00000007682	Dio2	12	-	90724552	90738438	protein_coding	0.17004	0.218165	0.154505	0	0.017226	0.020057	8.51196	1.6798e-10	3.70499e-09
	ENSMUSG00000027905	Ddx20	3	-	105678270	105687574	protein_coding	12.2732	11.9954	11.4817	17.5053	19.4066	20.2267	0.625873	1.78306e-10	3.9288e-09
	ENSMUSG00000085560	C230038L03Rik	7	-	96906826	96951886	processed_transcript	3.8029	3.4889	3.35269	1.06877	1.44023	0.740352	3.25506	1.791e-10	3.94235e-09
	ENSMUSG00000042498	D330045A20Rik	X	+	139480367	139554582	protein_coding	0.063847	0.127292	0.163902	0	0	0	12.8347	1.8102e-10	3.98064e-09
	ENSMUSG00000025888	Casp1	9	+	5298517	5307265	protein_coding	2.70657	2.68246	2.96262	0.754237	1.05217	0.925589	3.03464	1.83724e-10	4.03606e-09
	ENSMUSG00000040033	Stat2	10	+	128270559	128292849	protein_coding	8.25098	8.1362	8.3933	4.73681	4.10802	5.04855	1.78193	1.83931e-10	4.03659e-09
	ENSMUSG00000032846	Zswim6	13	-	107724617	107890064	processed_transcript	3.81709	4.51881	4.45434	1.99436	1.30277	1.79869	2.50111	1.9199e-10	4.20924e-09
	ENSMUSG00000024308	Tapbp	17	+	33915899	33929292	protein_coding	108.33	99.9204	102.489	67.8267	71.2967	69.3828	1.49024	1.94621e-10	4.26209e-09
	ENSMUSG00000034675	Dbn1	13	-	55473429	55488111	protein_coding	83.5963	65.9452	66.2601	43.2723	45.3332	32.4159	1.78297	1.94788e-10	4.26209e-09
	ENSMUSG00000054752	Fsd1l	4	+	53631471	53707009	protein_coding	1.56052	1.73444	1.85977	0.815238	0.861318	0.620152	2.22835	1.9522e-10	4.26731e-09
	ENSMUSG00000036356	Csgalnact1	8	-	68356781	68735146	protein_coding	2.174	1.98097	1.94839	0.751575	0.833034	0.890304	2.44853	1.9967e-10	4.36025e-09
	ENSMUSG00000074063	Osgin1	8	+	119434124	119446256	protein_coding	11.3506	12.3061	5.09661	3.48278	3.0537	2.18825	3.28774	2.03266e-10	4.43438e-09
	ENSMUSG00000001016	Ilf2	3	+	90476126	90488379	protein_coding	38.9757	39.0162	41.3827	59.4825	57.7725	61.5906	0.667529	2.08668e-10	4.54773e-09
	ENSMUSG00000042699	Dhx9	1	-	153455758	153487660	protein_coding	70.7093	74.6155	74.2733	101.075	101.171	109.839	0.703677	2.11503e-10	4.60494e-09
	ENSMUSG00000015957	Wnt11	7	+	98835112	98855195	protein_coding	1.01072	0.744782	0.972429	0.032593	0.088641	0.15279	9.07143	2.16298e-10	4.70469e-09
	ENSMUSG00000078812	Eif5a	11	-	69916714	69921958	protein_coding	439.13	468.728	416.789	613.185	645.812	683.612	0.681896	2.21357e-10	4.80998e-09
	ENSMUSG00000030849	Fgfr2	7	-	130162451	133123350	protein_coding	40.2472	43.3632	42.6255	31.5409	28.0219	26.9293	1.45935	2.223e-10	4.82571e-09
	ENSMUSG00000036432	Siah2	3	-	58674938	58692400	protein_coding	3.99158	4.50253	4.42898	7.67252	8.4547	8.51459	0.525016	2.22939e-10	4.83481e-09
	ENSMUSG00000070509	Rgma	7	+	73375509	73419899	protein_coding	6.47376	5.86742	6.47338	3.22416	3.32434	2.79539	2.01032	2.23492e-10	4.84204e-09
	ENSMUSG00000026142	Rhbdd1	1	+	82316452	82445366	protein_coding	5.97242	6.21673	6.38928	10.3304	10.5502	9.76705	0.606579	2.25274e-10	4.87584e-09
	ENSMUSG00000057454	Lypd3	7	+	24636550	24641118	protein_coding	13.8228	12.27	11.9474	6.65524	6.36415	5.89857	2.0092	2.2594e-10	4.88544e-09
	ENSMUSG00000027984	Hadh	3	-	131233419	131272101	protein_coding	41.0882	42.5206	43.8142	61.857	63.972	62.5742	0.676383	2.26533e-10	4.89346e-09
	ENSMUSG00000029528	Pxn	5	+	115506676	115555987	protein_coding	103.481	98.7225	89.4726	57.4648	64.7026	53.2911	1.66225	2.31959e-10	5.00577e-09
	ENSMUSG00000047604	Frat2	19	-	41845972	41848132	protein_coding	2.26438	1.73319	1.90261	0.627799	0.634583	0.697519	2.98014	2.40575e-10	5.18662e-09
	ENSMUSG00000083061	Gm12191	11	-	49678710	49679057	processed_pseudogene	187.932	191.782	183.063	307.521	340.489	258.395	0.620902	2.46058e-10	5.29447e-09
	ENSMUSG00000022770	Dlg1	16	+	31663443	31875129	protein_coding	38.3984	46.2225	41.1671	26.5516	26.3197	26.8778	1.57708	2.46058e-10	5.29447e-09
	ENSMUSG00000023033	Scn8a	15	+	100869858	101045938	protein_coding	1.90042	1.44471	1.26993	3.95542	2.94227	3.86076	0.430559	2.49616e-10	5.36577e-09
	ENSMUSG00000025278	Flnb	14	+	7817957	7951588	protein_coding	68.4425	68.8227	69.901	101.588	95.6856	96.9578	0.704123	2.54194e-10	5.45885e-09
	ENSMUSG00000032103	Pus3	9	+	35558595	35567401	protein_coding	14.3028	13.946	13.3145	21.2073	22.2787	22.3177	0.631793	2.59209e-10	5.56112e-09
	ENSMUSG00000022512	Cldn1	16	-	26356642	26371841	protein_coding	0.952803	0.647358	1.23457	0.160805	0.05292	0.188527	6.62746	2.59773e-10	5.56779e-09
	ENSMUSG00000034684	Sema3f	9	-	107681500	107710475	protein_coding	72.9658	72.6718	72.4767	50.3188	44.7977	41.9639	1.59101	2.6778e-10	5.73383e-09
	ENSMUSG00000042599	Kdm7a	6	-	39136623	39206789	protein_coding	3.22761	3.43405	3.29072	1.95916	1.83581	1.91936	1.73778	2.68949e-10	5.75325e-09
	ENSMUSG00000023883	Phf10	17	-	14945009	14961273	protein_coding	35.1575	38.0083	37.0438	53.5556	55.2437	53.1858	0.680428	2.8385e-10	6.06612e-09
	ENSMUSG00000079484	Phyhd1	2	+	30266203	30282149	protein_coding	22.9179	23.4408	22.4157	11.4468	7.70318	9.75011	2.3783	2.85976e-10	6.10562e-09
	ENSMUSG00000021575	Ahrr	13	-	74211118	74292331	protein_coding	0.058122	0.094212	0.084208	0	0	0	8.88473	2.92092e-10	6.23017e-09
	ENSMUSG00000059824	Dbp	7	+	45705088	45710203	protein_coding	7.0825	7.95339	8.43229	3.87957	2.93591	2.68953	2.46441	2.93471e-10	6.25351e-09
	ENSMUSG00000032174	Icam5	9	+	21032073	21039036	protein_coding	1.07556	0.827038	1.24202	0.156803	0.255717	0.311472	4.21041	3.02266e-10	6.43471e-09
	ENSMUSG00000027227	Sord	2	+	122234749	122265340	protein_coding	5.50655	5.02685	5.03553	2.23904	2.45119	1.65904	2.44525	3.07943e-10	6.54921e-09
	ENSMUSG00000027712	Anxa5	3	-	36448923	36475894	protein_coding	249.388	253.652	252.144	350.636	357.373	354.139	0.711005	3.17532e-10	6.74664e-09
	ENSMUSG00000022551	Cyc1	15	+	76343523	76346260	protein_coding	48.0968	43.4053	39.3455	73.1211	71.4431	67.0203	0.618472	3.25987e-10	6.9196e-09
	ENSMUSG00000032449	Slc25a36	9	-	97074961	97111157	protein_coding	19.8732	21.4944	21.8137	13.4294	13.3241	12.2489	1.61946	3.35312e-10	7.11067e-09
	ENSMUSG00000028782	Adgrb2	4	+	129984870	130022633	protein_coding	1.18035	1.05232	1.39376	0.599858	0.437405	0.618339	2.16921	3.39805e-10	7.19903e-09
	ENSMUSG00000025255	Zfhx4	3	+	5218526	5415857	protein_coding	0.017298	0.004035	0.008244	0.081918	0.096352	0.097551	0.19481	3.40906e-10	7.21541e-09
	ENSMUSG00000002028	Kmt2a	9	-	44803355	44881296	protein_coding	16.0119	17.7322	16.6966	11.795	10.6818	10.9094	1.51037	3.48664e-10	7.37252e-09
	ENSMUSG00000056209	Npm3	19	-	45747734	45749591	protein_coding	50.1302	48.9914	47.3402	72.0777	76.3148	73.3307	0.660607	3.49407e-10	7.38113e-09
	ENSMUSG00000052566	Hook2	8	+	84990603	85003349	protein_coding	37.0525	35.438	36.3466	22.9684	23.2911	25.0486	1.52607	3.52069e-10	7.43024e-09
	ENSMUSG00000020681	Ace	11	+	105967945	105989964	protein_coding	0.659349	0.459514	0.633576	0.125982	0.145684	0.04732	5.10748	3.54485e-10	7.47406e-09
	ENSMUSG00000008763	Man1a2	3	-	100562208	100685503	protein_coding	15.8947	16.4268	14.207	22.2879	22.7728	23.6623	0.677185	3.66818e-10	7.72669e-09
	ENSMUSG00000015748	Prpf3	3	-	95830124	95855885	protein_coding	21.6769	21.094	21.4828	30.7498	30.7758	29.6083	0.705144	3.84307e-10	8.08734e-09
	ENSMUSG00000039168	Dap	15	+	31224314	31274341	protein_coding	36.2276	32.3373	32.6548	49.9421	52.8396	51.2497	0.657204	3.88519e-10	8.16818e-09
	ENSMUSG00000026037	Orc2	1	-	58462771	58505109	protein_coding	11.9884	13.0047	11.393	19.2141	18.9	20.9576	0.61616	3.89768e-10	8.18661e-09
	ENSMUSG00000037458	Azin1	15	-	38487427	38519266	protein_coding	55.2255	47.7328	55.2501	75.3249	81.4326	99.6475	0.61707	3.9273e-10	8.24097e-09
	ENSMUSG00000001380	Hars	18	-	36766528	36783205	protein_coding	39.6783	42.1943	37.5111	58.812	60.6801	58.2897	0.671574	4.0526e-10	8.49579e-09
	ENSMUSG00000037112	Sik2	9	-	50892801	51009073	protein_coding	16.9354	16.8676	16.7897	10.8104	11.0528	10.283	1.5733	4.05904e-10	8.50121e-09
	ENSMUSG00000021061	Sptb	12	-	76580488	76710547	protein_coding	0.127604	0.130561	0.093372	0	0.013929	0	8.68531	4.19388e-10	8.77525e-09
	ENSMUSG00000006651	Aplp1	7	-	30434982	30445535	protein_coding	0.036407	0.03442	0.134695	0.650239	0.35221	0.507101	0.152981	4.19923e-10	8.7781e-09
	ENSMUSG00000072235	Tuba1a	15	-	98949837	98953703	protein_coding	189.381	173.273	172.478	116.222	119.832	122.077	1.49419	4.22645e-10	8.82662e-09
	ENSMUSG00000022336	Eif3e	15	-	43250058	43282719	protein_coding	133.301	127.788	132.082	179.298	198.957	208.081	0.670573	4.24392e-10	8.85471e-09
	ENSMUSG00000025001	Hells	19	+	38930915	38971051	protein_coding	27.7141	31.3076	29.7337	42.1487	41.542	44.4448	0.69274	4.27586e-10	8.9129e-09
	ENSMUSG00000035189	Ano4	10	-	88948994	89344762	protein_coding	0.289673	0.245004	0.331056	0.054368	0.05994	0.033667	5.03291	4.53286e-10	9.43966e-09
	ENSMUSG00000074480	Mex3a	3	+	88532395	88541396	protein_coding	19.1335	18.0962	18.1899	11.9401	12.2687	12.2387	1.5201	4.58159e-10	9.53214e-09
	ENSMUSG00000021390	Ogn	13	+	49608046	49624501	protein_coding	0.354399	0.497817	0.532298	0.021917	0.085485	0.025837	8.66529	4.71563e-10	9.80167e-09
	ENSMUSG00000032193	Ldlr	9	+	21723483	21749919	protein_coding	31.7634	33.0867	30.818	47.0163	44.7314	47.2936	0.688123	4.72005e-10	9.80167e-09
	ENSMUSG00000034382	AI661453	17	+	47436615	47470638	protein_coding	23.5829	28.5914	29.5629	16.2095	16.1952	15.8288	1.69418	4.97488e-10	1.03211e-08
	ENSMUSG00000028107	Tars2	3	-	95739976	95760206	protein_coding	15.1752	15.9822	17.6761	25.1124	29.6687	29.4059	0.580209	5.13218e-10	1.06374e-08
	ENSMUSG00000062866	Phactr2	10	-	13207717	13474412	protein_coding	0.038569	0.106505	0.031215	0	0	0	6.8763	5.23375e-10	1.08378e-08
	ENSMUSG00000103793	Pcdhga6	18	+	37707039	37841873	protein_coding	0	0	0	5.11555	1.09149	0	0.00480997	5.32859e-10	1.10196e-08
	ENSMUSG00000039501	Znfx1	2	-	167035793	167063015	protein_coding	12.418	13.2285	12.8336	8.69711	7.69764	8.86749	1.52261	5.33158e-10	1.10196e-08
	ENSMUSG00000048915	Efna5	17	-	62604184	62881317	protein_coding	16.8499	17.8528	18.4207	10.9668	11.3724	10.7409	1.60535	5.44516e-10	1.12438e-08
	ENSMUSG00000023156	Rpp14	14	+	8080367	8091834	protein_coding	16.8906	18.0148	17.1758	28.3505	28.758	24.9581	0.634755	5.50243e-10	1.13514e-08
	ENSMUSG00000031294	D630029K05Rik	10	+	116964707	116969105	lincRNA	0.526856	0.651902	0.78964	0.216922	0.05459	0.140337	4.52281	5.69532e-10	1.17277e-08
	ENSMUSG00000025082	Vwa2	19	+	56874249	56912078	protein_coding	4.78318	4.51731	5.13096	8.44697	7.81606	8.02164	0.594762	5.69548e-10	1.17277e-08
	ENSMUSG00000025757	Hspa4l	3	+	40744495	40796103	protein_coding	9.11894	11.1423	10.4877	13.4998	14.1899	14.2233	0.733828	5.71674e-10	1.17503e-08
	ENSMUSG00000027881	Prpf38b	3	-	108902805	108911727	protein_coding	26.4026	27.4586	29.3844	42.9535	41.6796	40.8387	0.663541	5.71716e-10	1.17503e-08
	ENSMUSG00000075569	Rsph10b	5	+	143933035	143985719	protein_coding	0.298164	0.467684	0.363034	0.037469	0.017542	0.014396	11.658	5.94078e-10	1.21985e-08
	ENSMUSG00000056665	Them6	15	+	74721204	74724639	protein_coding	1.61365	1.5897	1.44887	3.49813	4.45472	3.59371	0.404457	5.99155e-10	1.22913e-08
	ENSMUSG00000090257	Gm4524	16	+	25956475	25960342	antisense	0.344883	0.383063	0.437238	0.052267	0	0	14.5281	6.05427e-10	1.24084e-08
	ENSMUSG00000044149	Nkrf	X	-	36887540	36902899	protein_coding	4.14829	3.61357	3.07986	6.56449	7.33845	7.261	0.512964	6.08851e-10	1.24621e-08
	ENSMUSG00000037072	Selenof	3	+	144570304	144597680	protein_coding	131.596	125.889	124.413	175.505	194.662	181.142	0.692728	6.09178e-10	1.24621e-08
	ENSMUSG00000036564	Ndrg4	8	+	95676980	95715119	protein_coding	5.91672	6.27869	6.22971	3.38248	3.10157	2.47373	2.05336	6.38584e-10	1.30515e-08
	ENSMUSG00000107470	Gm3375	7	+	3181093	3181888	processed_pseudogene	32.3055	32.9851	33.0016	49.1345	53.2987	53.3813	0.630899	6.3923e-10	1.30526e-08
	ENSMUSG00000029787	Avl9	6	+	56714899	56761912	protein_coding	11.484	11.6443	12.0521	7.61596	7.27506	7.58402	1.56456	6.59489e-10	1.34538e-08
	ENSMUSG00000090093	Gm14399	2	-	175129493	175142012	protein_coding	0.68836	0.390888	0.509705	1.50449	1.46899	1.61202	0.350764	6.6648e-10	1.35838e-08
	ENSMUSG00000028175	Depdc1a	3	+	159495433	159529955	protein_coding	13.6565	14.2411	14.9364	23.6522	22.4364	23.0127	0.620038	6.74062e-10	1.37257e-08
	ENSMUSG00000021876	Rnase4	14	+	51091077	51106151	protein_coding	4.19527	4.19557	4.21118	1.90597	1.47838	1.5651	2.53683	6.85983e-10	1.39555e-08
	ENSMUSG00000087700	Gm15283	12	-	73843039	73949814	antisense	0.032967	0.032282	0.070773	0.6755	0.398731	0.674572	0.0933336	7.08027e-10	1.43907e-08
	ENSMUSG00000028108	Ecm1	3	-	95734147	95739569	protein_coding	37.3587	36.4823	36.0451	23.4525	22.0396	21.6545	1.63623	7.12204e-10	1.44622e-08
	ENSMUSG00000056493	Foxk1	5	+	142401497	142462011	protein_coding	27.7323	27.0927	26.3716	17.7149	19.6087	16.909	1.49692	7.14211e-10	1.44896e-08
	ENSMUSG00000004371	Il11	7	-	4772373	4782859	protein_coding	0.407485	0.549712	0.397891	0.072999	0.054282	0.052082	6.61572	7.15549e-10	1.45034e-08
	ENSMUSG00000000958	Slc7a7	14	-	54369442	54417780	protein_coding	1.27149	1.28922	1.03623	3.2134	3.60584	3.01118	0.367828	7.16442e-10	1.45081e-08
	ENSMUSG00000028796	Phc2	4	+	128654702	128752881	protein_coding	103.524	95.7015	106.364	59.506	77.2703	61.6205	1.54021	7.18632e-10	1.45391e-08
	ENSMUSG00000052632	Asap2	12	+	20990459	21270171	protein_coding	15.8974	15.3433	17.4718	11.0134	11.2978	10.4577	1.4861	7.19704e-10	1.45474e-08
	ENSMUSG00000109761	5430403N17Rik	8	-	35864085	35882957	lincRNA	0.385266	0.571329	0.435026	0.098541	0.074608	0.069981	5.20492	7.24045e-10	1.46217e-08
	ENSMUSG00000024885	Aldh3b1	19	-	3913491	3929808	protein_coding	9.77382	10.0735	9.12379	4.64884	5.29588	4.61109	1.98831	7.36482e-10	1.48593e-08
	ENSMUSG00000037487	Ubr5	15	-	37967328	38078854	protein_coding	51.6361	54.1683	53.3911	78.2083	66.608	78.1961	0.71388	7.47384e-10	1.50654e-08
	ENSMUSG00000050390	C77080	4	-	129219578	129261404	protein_coding	55.804	56.5874	57.87	39.6142	39.7629	35.1823	1.4861	7.54961e-10	1.52042e-08
	ENSMUSG00000020901	Pik3r5	11	+	68432121	68497849	protein_coding	1.27632	0.904533	1.09584	2.42352	2.51426	2.14296	0.465028	7.70788e-10	1.55088e-08
	ENSMUSG00000079317	Trappc2	X	+	166440574	166453140	protein_coding	1.767	1.42364	1.25424	3.44488	3.97138	4.27326	0.381831	8.04364e-10	1.61696e-08
	ENSMUSG00000074238	Ap1ar	3	-	127807007	127837523	protein_coding	18.0743	19.1521	20.9835	27.9408	27.5132	28.6024	0.69262	8.2752e-10	1.66199e-08
	ENSMUSG00000028073	Pear1	3	-	87747890	87824306	protein_coding	2.1033	1.82285	2.38248	5.34897	4.75321	3.63946	0.460267	8.47145e-10	1.69985e-08
	ENSMUSG00000110790	Gm47079	9	-	21028307	21032357	antisense	0.603434	0.636588	0.775382	0.087651	0.188041	0.051579	5.72508	8.54479e-10	1.713e-08
	ENSMUSG00000057530	Ece1	4	+	137862237	137965229	protein_coding	41.8348	42.0664	38.566	29.4422	32.5733	22.7394	1.4448	8.59957e-10	1.72242e-08
	ENSMUSG00000029231	Pdgfra	5	+	75152292	75198215	protein_coding	4.63819	5.43307	5.75601	2.79789	2.55232	2.72394	1.95669	8.61239e-10	1.72342e-08
	ENSMUSG00000118330	AC132148.1	19	+	10290926	10293421	antisense	0.542656	0.41155	0.511378	1.5544	1.41929	1.32591	0.345432	8.65774e-10	1.73092e-08
	ENSMUSG00000070372	Capza1	3	-	104822779	104864505	protein_coding	70.4167	69.2561	69.4148	98.0834	96.0678	102.817	0.704104	8.70704e-10	1.7392e-08
	ENSMUSG00000064246	Chil1	1	+	134182176	134190181	protein_coding	0.56479	0.880308	0.713401	0.122121	0.05964	0.072223	7.70642	8.71917e-10	1.74004e-08
	ENSMUSG00000039089	L3mbtl3	10	-	26274468	26375971	protein_coding	6.17823	6.17136	6.66467	3.69802	3.50374	4.00099	1.69542	8.75127e-10	1.74486e-08
	ENSMUSG00000023972	Ptk7	17	-	46564471	46629504	protein_coding	62.3483	58.6694	59.317	41.9173	34.7399	40.255	1.54234	8.8479e-10	1.76253e-08
	ENSMUSG00000044894	Uqcrq	11	-	53427922	53430831	protein_coding	26.8486	31.7358	28.6483	43.093	50.2781	42.3807	0.642669	8.85875e-10	1.7631e-08
	ENSMUSG00000041556	Fbxo2	4	+	148160621	148166424	protein_coding	31.3879	29.1425	30.9358	18.2992	18.6721	18.7071	1.64241	8.94225e-10	1.77811e-08
	ENSMUSG00000044337	Ackr3	1	+	90203980	90216751	protein_coding	17.3777	17.5583	18.0612	26.1263	27.5157	25.7924	0.667308	9.02644e-10	1.79323e-08
	ENSMUSG00000031970	Dbndd1	8	-	123504718	123515463	protein_coding	1.95936	1.25773	1.69311	0.418299	0.401199	0.515393	3.61948	9.22994e-10	1.83201e-08
	ENSMUSG00000054626	Xlr	X	-	53777118	53797706	protein_coding	0	0	0	0.462746	0.371968	0.233676	0.0273127	9.46884e-10	1.87669e-08
	ENSMUSG00000027952	Pmvk	3	+	89454541	89469013	protein_coding	11.726	11.5085	10.3073	19.585	23.5161	19.4476	0.536473	9.4721e-10	1.87669e-08
	ENSMUSG00000027822	Slc33a1	3	-	63933507	63964768	protein_coding	8.40965	9.01582	8.67925	12.3827	15.6081	16.4221	0.588052	9.54137e-10	1.88871e-08
	ENSMUSG00000027397	Slc20a1	2	+	129198764	129211616	protein_coding	44.4685	53.6784	42.6742	24.2489	26.1585	23.1333	1.9145	9.67002e-10	1.91207e-08
	ENSMUSG00000048490	Nrip1	16	-	76287400	76373827	protein_coding	9.48631	10.2215	14.5454	6.69651	6.49575	8.3923	1.58612	9.67677e-10	1.91207e-08
	ENSMUSG00000029135	Fosl2	5	+	32135801	32157842	protein_coding	27.7829	25.7139	25.4606	38.7212	38.3089	36.4686	0.695748	1.03281e-09	2.03894e-08
	ENSMUSG00000037601	Nme1	11	-	93956979	93968521	protein_coding	20.1254	20.8018	18.5756	28.754	29.2967	31.6961	0.66312	1.06224e-09	2.09517e-08
	ENSMUSG00000033883	D3Ertd254e	3	+	36151017	36170342	protein_coding	3.18559	3.40165	3.25193	5.2003	5.51801	5.42898	0.610063	1.109e-09	2.18544e-08
	ENSMUSG00000024462	Gabbr1	17	+	37045966	37075067	protein_coding	8.67596	9.44105	8.48013	4.83161	3.959	3.89101	2.09471	1.12245e-09	2.20996e-08
	ENSMUSG00000030629	Zfand6	7	-	84613766	84689959	protein_coding	39.3936	43.4991	31.7195	21.5238	19.5193	21.5388	1.831	1.15738e-09	2.2767e-08
	ENSMUSG00000026245	Farsb	1	-	78417975	78488897	protein_coding	27.6879	28.4418	28.4718	39.9946	43.8187	43.7774	0.663149	1.1666e-09	2.29279e-08
	ENSMUSG00000035161	Ints6	14	-	62676330	62761169	protein_coding	5.09424	3.12821	3.02484	7.77849	7.32266	7.08294	0.507664	1.17637e-09	2.30992e-08
	ENSMUSG00000061186	Sfmbt2	2	+	10370510	10595253	protein_coding	4.34771	4.30188	4.32793	6.69544	6.89191	6.50061	0.646563	1.19433e-09	2.3431e-08
	ENSMUSG00000020706	Ftsj3	11	-	106249142	106256079	protein_coding	41.5891	43.5052	40.6139	58.2187	61.8354	59.9964	0.698233	1.25243e-09	2.45491e-08
	ENSMUSG00000033285	Wdr3	3	-	100138180	100162407	protein_coding	22.0174	23.3707	22.0024	31.6814	32.2859	33.0195	0.694936	1.25668e-09	2.46104e-08
	ENSMUSG00000078485	Plekhn1	4	-	156221456	156234857	protein_coding	22.2354	21.9565	24.642	12.9531	14.311	13.893	1.67198	1.25809e-09	2.4616e-08
	ENSMUSG00000004707	Ly9	1	-	171588624	171607410	protein_coding	1.43519	1.04122	1.07914	3.08675	2.89827	3.20625	0.388835	1.27319e-09	2.48895e-08
	ENSMUSG00000024997	Prdx3	19	-	60864051	60874556	protein_coding	57.9194	58.4782	56.9552	81.0145	83.1332	87.3587	0.689295	1.32198e-09	2.58203e-08
	ENSMUSG00000020948	Klhl28	12	-	64938833	64965534	protein_coding	4.08855	4.74805	4.90188	3.10918	2.28069	2.33438	1.7756	1.35874e-09	2.65147e-08
	ENSMUSG00000096940	Gm4755	12	-	8764901	8771181	bidirectional_promoter_lncRNA	0.295651	0.287012	0.314534	0.042422	0	0	12.8027	1.36312e-09	2.65655e-08
	ENSMUSG00000028392	Bspry	4	+	62480053	62497298	protein_coding	8.41848	7.50759	6.91041	4.19114	3.22847	2.49349	2.29973	1.36376e-09	2.65655e-08
	ENSMUSG00000040322	Slc25a24	3	+	109123149	109168457	protein_coding	58.2214	58.9375	58.9887	82.3903	83.3237	81.8273	0.711624	1.37256e-09	2.67133e-08
	ENSMUSG00000051495	Irf2bp2	8	-	126588296	126593986	protein_coding	32.0514	32.9102	33.8241	22.7827	23.0312	20.253	1.49501	1.40079e-09	2.72388e-08
	ENSMUSG00000024512	Dynap	18	-	70240429	70244582	protein_coding	8.82028	8.01877	8.8892	16.2334	16.1482	15.3767	0.539007	1.43667e-09	2.79117e-08
	ENSMUSG00000015647	Lama5	2	-	180176373	180225859	protein_coding	129.143	125.344	131.991	93.0621	88.516	83.731	1.45666	1.43999e-09	2.79516e-08
	ENSMUSG00000041734	Kirrel	3	-	87078593	87174747	protein_coding	30.3006	29.7008	27.7695	41.1857	41.8301	39.0331	0.719214	1.4796e-09	2.86952e-08
	ENSMUSG00000030000	Add2	6	+	86028681	86124409	protein_coding	0.078464	0.143468	0.148727	0	0.022798	0.00813	6.57594	1.53324e-09	2.97091e-08
	ENSMUSG00000076441	Ass1	2	+	31470207	31520672	protein_coding	26.3663	25.1786	26.032	16.6878	16.043	15.6219	1.60402	1.55396e-09	3.00779e-08
	ENSMUSG00000028081	Rps3a1	3	-	86137940	86142702	protein_coding	590.583	606.356	593.903	830.38	830.606	829.362	0.719117	1.555e-09	3.00779e-08
	ENSMUSG00000026496	Parp1	1	+	180568924	180601254	protein_coding	52.5908	50.8086	51.5689	72.9075	72.1577	73.2825	0.709772	1.56434e-09	3.02319e-08
	ENSMUSG00000097178	2310002F09Rik	7	-	43695209	43797958	processed_transcript	2.65585	2.58482	3.11069	1.16667	0.8501	1.20817	2.57497	1.58437e-09	3.05923e-08
	ENSMUSG00000028885	Smpdl3b	4	-	132732966	132757252	protein_coding	16.643	19.7532	17.2177	29.2964	27.5484	27.2396	0.637749	1.66043e-09	3.20328e-08
	ENSMUSG00000097715	Gpr137b-ps	13	-	12615057	12650388	transcribed_unprocessed_pseudogene	25.5164	24.4803	29.4115	14.9133	15.9502	15.0369	1.72953	1.67383e-09	3.2263e-08
	ENSMUSG00000004151	Etv1	12	+	38779380	38870484	protein_coding	13.4256	19.061	12.4753	8.21529	6.37058	10.5515	1.78771	1.71728e-09	3.30715e-08
	ENSMUSG00000023913	Pla2g7	17	+	43568098	43612201	protein_coding	6.65537	7.36041	6.33234	2.94184	3.11043	3.23217	2.1878	1.74113e-09	3.34773e-08
	ENSMUSG00000028494	Plin2	4	-	86648386	86670060	protein_coding	94.39	89.8979	90.3469	61.7855	59.6647	64.0454	1.48047	1.74139e-09	3.34773e-08
	ENSMUSG00000000544	Gpa33	1	+	166130238	166166510	protein_coding	87.4933	95.4567	85.4623	61.9999	59.1167	57.7783	1.50031	1.75635e-09	3.37354e-08
	ENSMUSG00000023931	Efhb	17	-	53398889	53463321	protein_coding	0.213306	0.304126	0.29021	0.030611	0.030912	0.036389	6.54858	1.76134e-09	3.38018e-08
	ENSMUSG00000089911	Mfsd14a	3	-	116631164	116662677	protein_coding	21.1474	21.2389	21.1141	30.1533	31.0675	31.599	0.684228	1.77003e-09	3.39389e-08
	ENSMUSG00000053654	Krt42	11	-	100262882	100269871	protein_coding	0.558578	0.77422	0.696707	0.103377	0.071984	0	10.0287	1.77367e-09	3.39791e-08
	ENSMUSG00000020019	Ntn4	10	+	93640681	93747207	protein_coding	2.35867	2.27517	3.08959	0.97443	1.09492	0.72656	2.74369	1.79017e-09	3.42653e-08
	ENSMUSG00000079316	Rab9	X	-	166457253	166479867	protein_coding	8.64881	11.1258	11.0073	19.6934	21.0875	16.7967	0.534858	1.81031e-09	3.46208e-08
	ENSMUSG00000027932	Slc27a3	3	-	90385239	90389938	protein_coding	1.48095	1.22742	1.1486	3.11567	3.30426	2.49682	0.434456	1.82342e-09	3.48413e-08
	ENSMUSG00000028811	Yars	4	+	129189760	129219607	protein_coding	38.0995	36.2606	36.0596	52.4306	52.4672	52.1136	0.703316	1.82521e-09	3.48453e-08
	ENSMUSG00000020277	Pfkl	10	-	77986947	78010083	protein_coding	91.5001	91.0279	97.3216	132.813	131.712	126.204	0.716246	1.88186e-09	3.58956e-08
	ENSMUSG00000035246	Pcyt1b	X	+	93654863	93749951	protein_coding	30.8245	30.1333	30.1467	43.2628	42.8283	43.4458	0.703378	1.92071e-09	3.66048e-08
	ENSMUSG00000031467	Agpat5	8	+	18846277	18891361	protein_coding	4.42997	4.59865	4.29844	6.35923	6.76307	6.84438	0.667964	1.94166e-09	3.69721e-08
	ENSMUSG00000015697	Setdb1	3	-	95323525	95357202	protein_coding	16.3465	16.6074	17.5169	23.9999	23.828	25.2687	0.690594	1.94475e-09	3.6999e-08
	ENSMUSG00000000787	Ddx3x	X	+	13280970	13294052	protein_coding	74.4188	84.5091	74.7525	110.339	110.048	112.886	0.701195	1.97527e-09	3.75473e-08
	ENSMUSG00000031292	Cdkl5	X	-	160771923	160994704	protein_coding	0.582988	0.917328	0.553714	1.80719	1.60392	1.67258	0.407539	1.9771e-09	3.75496e-08
	ENSMUSG00000025464	Paox	7	+	140115799	140137224	protein_coding	5.68018	5.44779	5.43249	2.76388	3.3709	2.61588	1.88943	2.02753e-09	3.84742e-08
	ENSMUSG00000046733	Gprc5a	6	+	135065651	135084709	protein_coding	44.2305	44.9686	44.4981	28.9992	30.8899	28.6378	1.51007	2.08466e-09	3.95241e-08
	ENSMUSG00000026797	Stxbp1	2	-	32787602	32847245	protein_coding	16.3178	15.8542	16.2112	10.3572	10.6852	10.5971	1.5287	2.08946e-09	3.95811e-08
	ENSMUSG00000047562	Mmp10	9	+	7502352	7510240	protein_coding	2.01832	2.38246	2.38102	0.869495	0.821944	0.664425	2.85507	2.10476e-09	3.98365e-08
	ENSMUSG00000021108	Prkch	12	+	73584796	73778185	protein_coding	1.37297	1.02823	1.30929	0.317126	0.366506	0.478155	3.13856	2.10842e-09	3.98716e-08
	ENSMUSG00000016262	Sertad4	1	-	192844488	192855756	protein_coding	28.1897	28.1143	28.9778	39.4419	41.8043	41.6	0.694291	2.11209e-09	3.99068e-08
	ENSMUSG00000028789	Azin2	4	-	128930233	128962442	protein_coding	11.1824	10.8835	11.223	6.37754	6.39881	5.23416	1.84689	2.20489e-09	4.16244e-08
	ENSMUSG00000058254	Tspan7	X	+	10485158	10596605	protein_coding	1.0209	0.960586	1.53262	0	0.089487	0	29.661	2.22081e-09	4.1889e-08
	ENSMUSG00000027907	S100a11	3	+	93520488	93526287	protein_coding	498.267	498.827	488.513	702.785	710.634	664.409	0.714985	2.36002e-09	4.44767e-08
	ENSMUSG00000022500	Litaf	16	-	10959275	11066157	protein_coding	76.386	69.7828	75.6102	49.7079	51.4286	48.5128	1.48189	2.39696e-09	4.51342e-08
	ENSMUSG00000041298	Katnal1	5	-	148871584	148929320	protein_coding	10.5528	10.8646	9.29158	6.21023	5.80896	6.88817	1.62319	2.40937e-09	4.52904e-08
	ENSMUSG00000052334	1700024B05Rik	14	+	41943995	42003821	protein_coding	0.212878	0.337356	0.32659	1.3151	1.11023	0.981732	0.263837	2.45413e-09	4.60924e-08
	ENSMUSG00000024642	Tle4	19	-	14448150	14598051	protein_coding	5.26373	5.45979	4.81499	2.9127	2.94552	2.56171	1.84244	2.52822e-09	4.74434e-08
	ENSMUSG00000025817	Nudt5	2	+	5845019	5871895	protein_coding	12.2277	11.0442	11.3914	17.274	16.4296	22.1958	0.620305	2.63372e-09	4.93811e-08
	ENSMUSG00000018848	Rars	11	-	35808381	35834506	protein_coding	60.9661	65.8536	62.9405	84.8959	93.9332	91.165	0.702864	2.70968e-09	5.07621e-08
	ENSMUSG00000025591	Tma16	8	-	66473118	66486530	protein_coding	6.94491	7.53542	6.91589	11.417	10.6739	10.8794	0.649273	2.72295e-09	5.09303e-08
	ENSMUSG00000056214	Pard6g	18	+	80046890	80119639	protein_coding	0.662589	0.586301	0.533551	0.17823	0.087012	0.057846	5.13311	2.72328e-09	5.09303e-08
	ENSMUSG00000117975	Itprip	19	-	47894602	47919299	protein_coding	38.5281	32.8778	34.6986	22.6009	19.8572	23.851	1.59988	2.73339e-09	5.1076e-08
	ENSMUSG00000024613	Tcof1	18	-	60813755	60848971	protein_coding	29.4307	27.6459	30.3513	45.5383	37.5081	40.4544	0.707985	2.76973e-09	5.1711e-08
	ENSMUSG00000073591	Pcdhb22	18	+	37517871	37524479	protein_coding	0.185865	0.357716	0.280129	0.776291	0.82939	1.19535	0.301554	2.77637e-09	5.17911e-08
	ENSMUSG00000039879	Heca	10	-	17868612	17948067	protein_coding	27.459	26.6193	28.3232	18.8843	19.3881	17.7836	1.46973	2.79836e-09	5.21571e-08
	ENSMUSG00000021701	Plk2	13	+	110395046	110400844	protein_coding	56.1376	57.6513	53.4364	78.0501	79.5168	81.0962	0.700713	2.85034e-09	5.30809e-08
	ENSMUSG00000025993	Slc40a1	1	-	45908068	45926523	protein_coding	8.08222	10.1916	9.35257	5.32852	5.03067	5.36329	1.75568	2.92863e-09	5.44928e-08
	ENSMUSG00000061689	Dlgap4	2	+	156613705	156764363	protein_coding	18.861	17.6073	17.8627	11.5588	10.079	9.66398	1.73501	2.95573e-09	5.49506e-08
	ENSMUSG00000031388	Naa10	X	-	73916873	73921944	protein_coding	24.5273	25.3431	26.2951	45.9177	41.5113	35.2331	0.62103	3.00804e-09	5.58759e-08
	ENSMUSG00000027189	Trim44	2	-	102300119	102407828	protein_coding	28.059	28.5444	28.1761	19.2151	18.7499	20.0719	1.46055	3.04714e-09	5.65546e-08
	ENSMUSG00000024085	Man2a1	17	+	64600736	64755110	protein_coding	21.3193	21.4254	21.9325	30.3115	29.3823	31.5928	0.708603	3.07605e-09	5.70431e-08
	ENSMUSG00000054414	Slc30a7	3	-	115938973	116007406	protein_coding	4.56898	4.61369	4.92856	7.28122	6.97773	7.01915	0.663655	3.23781e-09	5.99921e-08
	ENSMUSG00000056116	H2-T22	17	-	36037128	36042747	protein_coding	26.5456	27.0821	27.3061	17.0444	17.8627	16.9075	1.56166	3.33996e-09	6.18327e-08
	ENSMUSG00000022280	Rnf19a	15	-	36239933	36283147	protein_coding	30.8752	29.3528	29.4751	42.8592	42.2597	40.8773	0.712019	3.37067e-09	6.23489e-08
	ENSMUSG00000025473	Adam8	7	-	139978932	139992562	protein_coding	25.1745	22.9767	23.5096	35.2257	33.5713	32.8965	0.704761	3.38059e-09	6.248e-08
	ENSMUSG00000031278	Acsl4	X	-	142317993	142390535	protein_coding	48.6488	49.8233	50.2612	34.549	33.1813	34.8113	1.45034	3.39152e-09	6.26293e-08
	ENSMUSG00000020042	Btbd11	10	+	85386814	85660292	protein_coding	2.08588	2.33303	1.95574	3.952	4.09644	3.76251	0.54089	3.42335e-09	6.31641e-08
	ENSMUSG00000042842	Serpinb6b	13	+	32965209	32979067	protein_coding	11.5469	11.6613	10.1342	5.97415	6.09785	6.42396	1.80139	3.62559e-09	6.68397e-08
	ENSMUSG00000048007	Timm8a1	X	-	134537256	134541865	protein_coding	8.08193	9.26929	9.43285	17.1218	14.9302	16.0509	0.557084	3.63258e-09	6.69125e-08
	ENSMUSG00000026981	Il1rn	2	+	24336853	24351494	protein_coding	0.256569	0.225141	0.209974	0.022732	0	0	13.6859	3.65706e-09	6.73071e-08
	ENSMUSG00000026421	Csrp1	1	+	135720061	135752232	protein_coding	97.6878	93.0522	95.8577	66.5832	64.7982	66.5829	1.44766	3.69532e-09	6.79544e-08
	ENSMUSG00000031168	Ebp	X	-	8185329	8193512	protein_coding	8.97126	8.98787	8.62971	15.3541	15.11	14.2288	0.595195	3.78087e-09	6.94695e-08
	ENSMUSG00000043953	Ccrl2	9	-	111054486	111057519	protein_coding	0.949459	0.888469	0.935817	0.06846	0.224708	0.242562	4.95598	3.82435e-09	7.02098e-08
	ENSMUSG00000044562	Rasip1	7	+	45627488	45639093	protein_coding	0.396684	0.328883	0.355306	0.052691	0.051379	0.098263	4.78138	3.89017e-09	7.13197e-08
	ENSMUSG00000048696	Mex3d	10	-	80380355	80387659	protein_coding	31.4699	29.4384	31.2454	20.3601	20.1272	18.0394	1.57426	3.89129e-09	7.13197e-08
	ENSMUSG00000025607	Copg2	6	-	30747554	30896794	protein_coding	27.6426	26.3511	29.456	18.2102	18.7475	18.0247	1.51747	3.91945e-09	7.17761e-08
	ENSMUSG00000055639	Dach1	14	-	97786853	98169765	protein_coding	0.063882	0.037545	0.142453	0	0	0	9.12933	3.968e-09	7.26049e-08
	ENSMUSG00000026208	Des	1	+	75360329	75368579	protein_coding	0.115084	0.198677	0.339404	0	0	0	22.7722	4.15432e-09	7.59509e-08
	ENSMUSG00000043391	2510009E07Rik	16	-	21649045	21694665	protein_coding	0.159722	0.086334	0.132453	0.010891	0	0	9.99019	4.23173e-09	7.73019e-08
	ENSMUSG00000037572	Wdhd1	14	-	47240944	47276857	protein_coding	13.4316	13.379	14.8823	19.0175	19.5138	20.0916	0.711353	4.23902e-09	7.73709e-08
	ENSMUSG00000034159	2310007B03Rik	1	-	93151349	93160948	protein_coding	4.37501	3.82117	5.10213	1.68054	2.05005	1.98052	2.32156	4.323e-09	7.88383e-08
	ENSMUSG00000031256	Cstf2	X	+	134059187	134086819	protein_coding	20.1825	22.4728	20.312	30.8632	33.5742	32.9501	0.646673	4.48661e-09	8.17544e-08
	ENSMUSG00000035614	Togaram1	12	+	64965804	65022573	protein_coding	17.2304	17.977	17.9905	11.9936	11.215	12.753	1.4789	4.52076e-09	8.23084e-08
	ENSMUSG00000033762	Recql4	15	-	76703553	76710548	protein_coding	3.03445	2.80899	2.8833	5.27533	5.50579	4.88429	0.557917	4.61959e-09	8.40384e-08
	ENSMUSG00000047910	Pcdhb16	18	+	37477814	37483038	protein_coding	0.09152	0.069647	0.032763	0.267795	0.339947	0.398906	0.216014	4.63426e-09	8.42357e-08
	ENSMUSG00000013523	Bcas1	2	-	170346991	170427845	protein_coding	0.196338	0.259574	0.279684	0.690351	0.754465	0.78658	0.33855	4.6876e-09	8.51348e-08
	ENSMUSG00000038299	Wdr36	18	+	32837225	32867594	protein_coding	77.2473	76.8981	78.7243	109.929	101.507	106.716	0.73197	4.92031e-09	8.92876e-08
	ENSMUSG00000058656	Samd12	15	-	53453810	53902537	protein_coding	11.5159	13.4348	13.2881	8.80611	7.98464	8.55013	1.50837	4.9265e-09	8.93263e-08
	ENSMUSG00000061666	Gdpd1	11	-	87033867	87074062	protein_coding	17.2675	17.1437	17.1812	10.425	10.9623	11.0146	1.59172	4.99426e-09	9.04803e-08
	ENSMUSG00000074212	Dnajb14	3	+	137867675	137916557	protein_coding	4.06573	4.02741	3.98166	6.14348	6.08296	5.84671	0.668657	5.06628e-09	9.17096e-08
	ENSMUSG00000021754	Map3k1	13	-	111746428	111808993	protein_coding	8.66225	8.24901	8.01103	5.50464	5.40888	5.19323	1.5463	5.18822e-09	9.38289e-08
	ENSMUSG00000058587	Tmod3	9	-	75497707	75559657	protein_coding	82.2248	83.2959	82.3543	56.6458	55.4983	59.4654	1.44434	5.19188e-09	9.38289e-08
	ENSMUSG00000029765	Plxna4	6	-	32144268	32588192	protein_coding	0.045585	0.021753	0.02602	0	0	0	4.11193	5.20483e-09	9.39857e-08
	ENSMUSG00000055976	Cldn23	8	-	35824712	35826559	protein_coding	2.36728	2.56024	2.69907	1.11798	0.851167	0.932645	2.61157	5.24923e-09	9.46601e-08
	ENSMUSG00000085395	Gm13056	4	+	141278439	141279794	lincRNA	24.6723	20.9551	21.4633	11.402	10.573	9.95516	2.10014	5.25077e-09	9.46601e-08
	ENSMUSG00000086219	Srrm4os	5	+	116438720	116465487	antisense	0.166545	0.289977	0.198399	0.025051	0	0	12.4416	5.29844e-09	9.54413e-08
	ENSMUSG00000097535	Gm26592	9	-	21034290	21037782	antisense	0.164827	0.142341	0.270012	0	0	0	20.2393	5.35575e-09	9.63948e-08
	ENSMUSG00000055148	Klf2	8	+	72319033	72321656	protein_coding	1.64383	1.38342	1.56655	0.368431	0.45981	0.594008	3.18389	5.49526e-09	9.88249e-08
	ENSMUSG00000021737	Psmd6	14	-	14112174	14120984	protein_coding	41.8432	41.7232	41.9172	58.0549	59.9432	62.5013	0.695253	5.54718e-09	9.96772e-08
	ENSMUSG00000025190	Got1	19	-	43499752	43524605	protein_coding	30.121	30.4816	27.6629	43.8703	42.0795	45.5594	0.671249	5.5838e-09	1.00253e-07
	ENSMUSG00000026281	Dtymk	1	-	93792576	93801934	protein_coding	43.4006	45.8348	43.0177	63.7787	67.0723	64.0495	0.678617	5.60751e-09	1.00597e-07
	ENSMUSG00000045427	Hnrnph2	X	+	134601179	134607060	protein_coding	30.6351	27.1651	27.4672	39.9123	42.4452	41.9923	0.685782	5.70031e-09	1.02178e-07
	ENSMUSG00000033487	Fndc3a	14	-	72537946	72710003	protein_coding	39.0255	37.5409	39.4374	27.556	25.0433	25.5925	1.48339	5.78436e-09	1.03601e-07
	ENSMUSG00000000325	Arvcf	16	+	18348182	18407076	protein_coding	14.1169	13.3634	12.5279	8.11362	9.32626	8.55021	1.53874	5.80882e-09	1.03954e-07
	ENSMUSG00000042997	Nhlrc3	3	-	53448583	53463332	protein_coding	3.83572	4.18351	4.39796	6.4252	6.73395	7.12084	0.61286	5.92217e-09	1.05897e-07
	ENSMUSG00000001248	Gramd1a	7	-	31130127	31155896	protein_coding	24.7472	24.1878	26.9167	16.8409	16.6679	14.7399	1.57174	6.05754e-09	1.08229e-07
	ENSMUSG00000027611	Procr	2	+	155751117	155755471	protein_coding	20.1739	19.458	20.1798	12.2852	11.0747	11.3241	1.72385	6.10544e-09	1.08992e-07
	ENSMUSG00000069662	Marcks	10	-	37133375	37138920	protein_coding	25.5021	24.0569	25.3143	16.0924	17.2862	16.7793	1.49246	6.11015e-09	1.08992e-07
	ENSMUSG00000038619	Ensa	3	+	95624993	95632102	protein_coding	22.0489	18.6752	17.9514	32.0519	31.0013	25.3568	0.663789	6.40484e-09	1.14157e-07
	ENSMUSG00000033909	Usp36	11	-	118259651	118290244	protein_coding	7.66924	7.79871	7.23951	11.4274	11.2816	11.7141	0.659954	6.57383e-09	1.17074e-07
	ENSMUSG00000024039	Cbs	17	-	31608894	31637238	protein_coding	0.180877	0.107882	0.197035	0	0	0.008362	13.4454	6.77014e-09	1.20472e-07
	ENSMUSG00000025198	Erlin1	19	-	44034944	44069785	protein_coding	14.2552	15.3323	14.8931	22.5528	21.3348	21.8742	0.676537	6.93102e-09	1.23236e-07
	ENSMUSG00000029146	Snx17	5	+	31193227	31199143	protein_coding	22.6546	22.1755	21.4854	34.8428	33.5789	31.0026	0.667095	7.15551e-09	1.27124e-07
	ENSMUSG00000035898	Uba6	5	-	86109287	86172803	protein_coding	10.8703	12.1157	12.0306	16.401	16.4353	17.0213	0.702511	7.31929e-09	1.29929e-07
	ENSMUSG00000026875	Traf1	2	-	34941750	34961772	protein_coding	21.8998	22.2295	20.7874	14.2575	14.0999	12.6641	1.58208	7.39096e-09	1.31096e-07
	ENSMUSG00000020439	Smtn	11	-	3517523	3540612	protein_coding	76.0912	76.2007	75.7461	54.9557	56.3968	50.8601	1.40572	7.44406e-09	1.31931e-07
	ENSMUSG00000052539	Magi3	3	-	104013259	104220374	protein_coding	14.3814	14.1673	14.6296	20.3756	19.9042	20.9037	0.705862	7.579e-09	1.34215e-07
	ENSMUSG00000105966	Gm43242	3	+	102369162	102370937	lincRNA	0.444701	0.357263	0.279615	1.70965	1.26063	1.05535	0.274083	7.97878e-09	1.41181e-07
	ENSMUSG00000020941	Map3k14	11	-	103219762	103267472	protein_coding	11.6752	11.9761	11.8204	7.84534	7.04919	7.7911	1.56288	8.04454e-09	1.4223e-07
	ENSMUSG00000027134	Lpcat4	2	+	112239468	112247111	protein_coding	21.1685	22.2477	23.9779	33.2332	34.931	31.7628	0.674531	8.11683e-09	1.43393e-07
	ENSMUSG00000022773	Ypel1	16	+	17069696	17087045	protein_coding	4.34392	4.56102	3.58119	0.959045	1.39285	1.76511	3.01811	8.46717e-09	1.49462e-07
	ENSMUSG00000018340	Anxa6	11	-	54979108	55033445	protein_coding	195.982	187.895	196.266	136.229	135.314	139.602	1.41101	8.57147e-09	1.51182e-07
	ENSMUSG00000026377	Nifk	1	+	118321839	118333822	protein_coding	21.4973	22.9624	21.7512	31.2147	32.3251	34.4807	0.675579	8.66207e-09	1.52658e-07
	ENSMUSG00000040584	Abcb1a	5	+	8660077	8748575	protein_coding	0.459949	0.528842	0.450268	0.0308	0.07	0.039803	8.61098	8.74829e-09	1.54054e-07
	ENSMUSG00000038374	Rbm8a	3	+	96629933	96633791	protein_coding	18.5299	18.4616	16.664	24.6712	31.3982	27.638	0.641117	8.95917e-09	1.57609e-07
	ENSMUSG00000021890	Eaf1	14	+	31494399	31509858	protein_coding	10.9709	12.2717	12.1982	16.3789	16.427	17.7016	0.701871	8.96447e-09	1.57609e-07
	ENSMUSG00000028957	Per3	4	-	151003652	151044665	protein_coding	5.84582	5.40595	5.94385	3.49752	3.35881	3.57927	1.64593	9.07592e-09	1.59441e-07
	ENSMUSG00000040586	Ofd1	X	-	166390033	166440704	protein_coding	1.92227	2.80354	2.42864	4.87123	5.12608	4.27431	0.502352	9.10005e-09	1.59737e-07
	ENSMUSG00000042109	Csdc2	15	+	81936759	81950941	protein_coding	0.050434	0.14037	0.17367	0	0	0	13.1491	9.31835e-09	1.63439e-07
	ENSMUSG00000001942	Siae	9	+	37555698	37649655	protein_coding	17.6964	18.4161	17.7959	26.2956	25.7518	24.9137	0.70058	9.40566e-09	1.64839e-07
	ENSMUSG00000070570	Slc17a7	7	+	45163949	45176142	protein_coding	0.18132	0.210413	0.149531	0.01826	0	0	11.8372	9.52884e-09	1.66865e-07
	ENSMUSG00000017446	C1qtnf1	11	+	118428203	118449963	protein_coding	24.1806	20.8307	22.1722	30.6119	33.864	34.6763	0.677677	9.539e-09	1.6691e-07
	ENSMUSG00000071379	Hpcal1	12	+	17690856	17791933	protein_coding	34.422	34.4184	33.9714	22.5806	22.8713	20.0469	1.56941	9.58963e-09	1.67662e-07
	ENSMUSG00000022034	Esco2	14	-	65819038	65833994	protein_coding	13.2625	13.7683	15.5523	22.3569	19.3269	20.7962	0.681701	9.75661e-09	1.70446e-07
	ENSMUSG00000029186	Pi4k2b	5	+	52741574	52769340	protein_coding	40.7586	42.9035	41.9422	28.8796	28.5235	29.7034	1.44181	9.85962e-09	1.72109e-07
	ENSMUSG00000061024	Rrs1	1	+	9545408	9547455	protein_coding	27.2584	29.3116	26.7739	39.8597	41.0032	39.9451	0.689964	9.88977e-09	1.72499e-07
	ENSMUSG00000050132	Sarm1	11	-	78472330	78497754	protein_coding	0.148949	0.387337	0.277674	0.031712	0.02253	0.032695	7.21722	1.06681e-08	1.85927e-07
	ENSMUSG00000039634	Zfp189	4	+	49521176	49531517	protein_coding	3.0759	2.73142	3.22136	1.29252	1.50928	1.2595	2.21413	1.08455e-08	1.88869e-07
	ENSMUSG00000039640	Mrpl12	11	+	120484613	120489065	protein_coding	31.1443	32.4261	31.1348	45.2745	47.0141	46.4534	0.682668	1.08649e-08	1.89058e-07
	ENSMUSG00000029777	Gars	6	+	55038007	55079500	protein_coding	103.131	111.866	104.877	141.368	150.192	155.996	0.714732	1.09145e-08	1.89653e-07
	ENSMUSG00000018707	Dync1h1	12	+	110601452	110666945	protein_coding	106.085	98.6921	107.588	75.5132	71.2125	72.9015	1.42219	1.09163e-08	1.89653e-07
	ENSMUSG00000027962	Vcam1	3	-	116109949	116129688	protein_coding	26.4367	25.6391	25.2014	35.7188	37.3358	37.6972	0.697833	1.09831e-08	1.90663e-07
	ENSMUSG00000024975	Pdcd4	19	+	53892231	53929860	protein_coding	30.6911	29.2393	28.9146	20.0159	19.6406	17.312	1.55925	1.11928e-08	1.9415e-07
	ENSMUSG00000028053	Ash1l	3	+	88950622	89079375	protein_coding	12.2289	13.6529	13.3046	18.7192	17.9284	18.0219	0.716943	1.1357e-08	1.96843e-07
	ENSMUSG00000048234	Rnf149	1	-	39551296	39577405	protein_coding	10.3196	11.7955	11.2727	17.1201	16.0715	15.595	0.684558	1.15677e-08	2.00337e-07
	ENSMUSG00000024421	Lama3	18	+	12333819	12583013	protein_coding	26.4545	26.6101	26.016	18.4447	14.5431	17.5338	1.56495	1.16119e-08	2.00944e-07
	ENSMUSG00000038524	Fchsd1	18	-	37957431	37969774	protein_coding	6.80209	6.76505	6.59968	3.51959	3.68196	3.70997	1.84589	1.19403e-08	2.06465e-07
	ENSMUSG00000019838	Slc16a10	10	-	40033532	40142258	protein_coding	0.890576	0.796659	1.04775	0.306955	0.164886	0.364724	3.19074	1.19597e-08	2.06638e-07
	ENSMUSG00000032690	Oas2	5	-	120730333	120749853	protein_coding	0.694723	0.708255	0.653438	0.085236	0.041534	0.188537	6.04221	1.21479e-08	2.09725e-07
	ENSMUSG00000021711	Trappc13	13	-	104142149	104178469	protein_coding	32.8886	33.1069	31.9155	44.7373	47.6142	46.7287	0.704053	1.22098e-08	2.10628e-07
	ENSMUSG00000038803	Ost4	5	-	30905885	30907788	protein_coding	33.0805	34.1111	31.7562	49.7274	53.1959	49.5002	0.649233	1.223e-08	2.10812e-07
	ENSMUSG00000022604	Cep97	16	-	55899888	55934855	protein_coding	2.93029	4.30303	4.17896	2.54388	2.17233	2.27885	1.62878	1.23865e-08	2.13343e-07
	ENSMUSG00000028136	Snx27	3	-	94497544	94582716	protein_coding	20.9714	22.8673	22.9305	32.2239	30.2431	32.6476	0.702081	1.25496e-08	2.15983e-07
	ENSMUSG00000024423	Impact	18	+	12955852	12992950	protein_coding	8.46396	9.00596	9.36778	13.1466	11.5975	12.573	0.719405	1.2652e-08	2.17574e-07
	ENSMUSG00000020424	Castor1	11	+	4218225	4222409	protein_coding	17.2681	16.9515	16.2152	8.73063	9.97189	10.1773	1.74559	1.28085e-08	2.20094e-07
	ENSMUSG00000003420	Fcgrt	7	-	45092990	45103851	protein_coding	0.452816	0.405095	0.484046	0.022978	0.092166	0.090408	5.82443	1.28273e-08	2.20246e-07
	ENSMUSG00000026437	Cdk18	1	-	132112237	132139684	protein_coding	12.9076	12.4809	12.7328	9.11882	8.31578	8.00654	1.49782	1.28559e-08	2.20565e-07
	ENSMUSG00000025427	Rnf165	18	-	77456110	77565161	protein_coding	0.462353	0.396647	0.410157	0.088498	0	0.081519	6.49523	1.31617e-08	2.25635e-07
	ENSMUSG00000061758	Akr1b10	6	+	34384218	34396950	protein_coding	12.097	12.3403	12.8973	6.66605	6.05959	6.56173	1.93425	1.33138e-08	2.28064e-07
	ENSMUSG00000027938	Creb3l4	3	-	90237500	90243512	protein_coding	1.23281	1.97062	1.82105	0.47014	0.410711	0.490851	3.60596	1.34118e-08	2.29565e-07
	ENSMUSG00000038387	Rras	7	+	45017961	45021647	protein_coding	62.0085	57.1242	56.6971	39.9539	38.2182	34.2757	1.56351	1.35515e-08	2.31776e-07
	ENSMUSG00000004642	Slbp	5	-	33634952	33652574	protein_coding	33.0428	33.4912	32.6484	45.2862	47.4622	48.6448	0.701528	1.36484e-08	2.33252e-07
	ENSMUSG00000023106	Denr	5	+	123907175	123928835	protein_coding	20.7317	22.8893	20.2805	31.7913	31.1615	32.8214	0.667314	1.36955e-08	2.33875e-07
	ENSMUSG00000020101	Vsir	10	+	60346851	60372684	protein_coding	2.44688	2.29796	1.79573	0.47258	0.327883	0.182932	6.48372	1.3736e-08	2.34385e-07
	ENSMUSG00000047414	Flrt2	12	+	95692226	95785215	protein_coding	0.177431	0.204888	0.177205	0.015765	0.007725	0.046758	5.88066	1.37683e-08	2.34755e-07
	ENSMUSG00000031642	Sh3rf1	8	+	61223872	61396071	protein_coding	19.1523	18.6566	19.4266	12.9113	13.3021	12.8674	1.46419	1.41608e-08	2.4126e-07
	ENSMUSG00000022262	Dnah5	15	+	28203752	28472052	protein_coding	0.024173	0.013232	0.023736	0	0	0	3.03803	1.42443e-08	2.42495e-07
	ENSMUSG00000026870	Cutal	2	+	34874396	34892132	protein_coding	0.469238	1.08077	0.487013	0.074064	0.072219	0.05188	9.0594	1.42831e-08	2.42967e-07
	ENSMUSG00000035451	Foxa1	12	-	57540628	57546916	protein_coding	2.14318	1.78553	2.14791	0.788392	0.939928	0.83954	2.35063	1.43155e-08	2.4333e-07
	ENSMUSG00000048109	Rbm15	3	-	107325421	107333673	protein_coding	7.91431	7.73668	7.23544	11.611	11.1698	10.7745	0.682335	1.44934e-08	2.46163e-07
	ENSMUSG00000060336	Zfp937	2	+	150218073	150240725	protein_coding	0.466636	0.698498	0.552743	0.080428	0.174593	0.071348	4.90468	1.45615e-08	2.4713e-07
	ENSMUSG00000029455	Aldh2	5	-	121566027	121593824	protein_coding	120.092	104.172	123.191	83.7184	73.8046	133.271	1.19483	1.46838e-08	2.49014e-07
	ENSMUSG00000027030	Stk39	2	-	68210445	68472268	protein_coding	24.4633	25.8963	24.0928	18.2898	17.6236	18.4201	1.37008	1.48283e-08	2.5127e-07
	ENSMUSG00000000561	Wdr77	3	+	105959369	105970037	protein_coding	17.5185	17.2962	11.7319	32.0085	15.655	35.9006	0.557176	1.49973e-08	2.53939e-07
	ENSMUSG00000010307	Tmem86a	7	+	47050601	47054777	protein_coding	15.535	14.1582	14.161	8.66443	8.62163	8.41356	1.70559	1.53849e-08	2.60302e-07
	ENSMUSG00000038020	Rapgefl1	11	+	98836785	98853697	protein_coding	1.92595	2.03161	2.13014	0.994542	0.848198	1.10375	2.05534	1.54903e-08	2.61883e-07
	ENSMUSG00000006435	Neurl1a	19	+	47178820	47259441	protein_coding	7.06287	6.55266	8.44521	4.07533	4.30513	4.07681	1.76906	1.55597e-08	2.62854e-07
	ENSMUSG00000049090	Zadh2	18	+	84088063	84097528	protein_coding	11.3866	12.3502	13.1534	17.537	18.5439	19.2502	0.666898	1.56065e-08	2.63443e-07
	ENSMUSG00000028049	Scamp3	3	+	89177473	89182765	protein_coding	14.9602	15.025	14.5861	23.9095	22.7186	24.9195	0.623118	1.57765e-08	2.66108e-07
	ENSMUSG00000024590	Lmnb1	18	+	56707813	56753424	protein_coding	63.0749	62.0015	64.9655	88.6007	83.8373	90.4687	0.722881	1.59283e-08	2.68464e-07
	ENSMUSG00000015714	Cers2	3	+	95314791	95323599	protein_coding	59.8341	62.4958	60.5222	94.6565	84.7928	85.2912	0.690719	1.60754e-08	2.70736e-07
	ENSMUSG00000034855	Cxcl10	5	-	92346638	92348889	protein_coding	3.34197	2.40511	3.31909	0.50985	0.907602	1.05825	3.63019	1.61163e-08	2.71218e-07
	ENSMUSG00000101211	Gm28818	1	-	71894068	71917125	lincRNA	0.517957	0.226112	0.181512	0.018815	0	0.022181	13.4596	1.61307e-08	2.71252e-07
	ENSMUSG00000078652	Psme3	11	+	101316213	101323537	protein_coding	47.7015	47.4248	45.7284	61.5988	68.2323	64.2354	0.725849	1.63712e-08	2.75086e-07
	ENSMUSG00000056457	Prl2c3	13	-	12790816	12800079	protein_coding	2.76798	2.83059	2.69543	1.00838	0.922041	0.607955	3.24096	1.64416e-08	2.76058e-07
	ENSMUSG00000042647	Acad12	5	-	121596775	121618938	protein_coding	1.8364	2.00007	1.93542	0.873993	0.891153	0.763004	2.268	1.65508e-08	2.7768e-07
	ENSMUSG00000033400	Agl	3	-	116739999	116808166	protein_coding	7.34339	7.38614	6.64399	10.7601	11.6968	10.3247	0.652316	1.67526e-08	2.80852e-07
	ENSMUSG00000034424	Gcsh	8	-	116981810	116993537	protein_coding	33.7665	32.7427	30.7523	45.7962	49.0404	47.2013	0.684824	1.67892e-08	2.81182e-07
	ENSMUSG00000038335	Tsr1	11	+	74898071	74909342	protein_coding	17.8283	19.1914	17.8231	31.7412	33.0849	24.2388	0.615892	1.67978e-08	2.81182e-07
	ENSMUSG00000116024	Gm49527	15	+	76879320	76901283	protein_coding	0	2.85882	3.61868	0	0	0	216.917	1.70444e-08	2.84883e-07
	ENSMUSG00000116237	Gm30339	15	+	93734413	93738490	lincRNA	0.146116	0.084773	0.127051	0	0	0	12.9313	1.70448e-08	2.84883e-07
	ENSMUSG00000020739	Nup85	11	+	115564434	115583985	protein_coding	39.3832	43.1572	41.64	57.5252	56.7724	57.8681	0.721333	1.70741e-08	2.85156e-07
	ENSMUSG00000010097	Nxf1	19	+	8757073	8770922	protein_coding	25.7967	25.4462	25.6536	38.1362	36.3658	41.9417	0.660462	1.72165e-08	2.87317e-07
	ENSMUSG00000030269	Mtmr14	6	+	113237843	113281392	protein_coding	22.5428	21.0518	21.2185	13.2155	15.2218	13.5566	1.54301	1.72515e-08	2.87683e-07
	ENSMUSG00000040506	Ambra1	2	+	91730134	91918849	protein_coding	11.9074	12.6736	12.4753	8.73161	8.40053	7.9137	1.47897	1.77712e-08	2.96123e-07
	ENSMUSG00000024401	Tnf	17	-	35199381	35202007	protein_coding	0.285414	0.42675	0.286239	1.24648	1.46616	0.940639	0.279209	1.84616e-08	3.07395e-07
	ENSMUSG00000027957	Slc35a3	3	-	116669470	116712831	protein_coding	18.0964	19.1022	17.1417	24.4266	24.8567	26.0406	0.721533	1.87971e-08	3.12744e-07
	ENSMUSG00000028009	1700061I17Rik	3	-	117060522	117077765	lincRNA	0.22647	0.291185	0.431982	1.2263	1.07879	1.0291	0.291196	1.89786e-08	3.15526e-07
	ENSMUSG00000056724	Nbeal2	9	-	110624789	110654161	protein_coding	14.6074	13.6297	16.1271	9.7838	9.48405	9.11872	1.56226	1.90905e-08	3.16984e-07
	ENSMUSG00000028707	Dmbx1	4	-	115915119	115939926	protein_coding	3.83033	4.55302	3.78023	2.14845	1.97993	1.93039	2.00263	1.90951e-08	3.16984e-07
	ENSMUSG00000057130	Txnl4a	18	+	80206795	80225855	protein_coding	10.0406	9.14858	8.16299	14.2347	13.7454	14.206	0.648619	1.9432e-08	3.22334e-07
	ENSMUSG00000000628	Hk2	6	-	82725025	82774454	protein_coding	49.8862	46.2262	48.8602	33.7899	33.3769	34.2797	1.42893	1.95023e-08	3.23256e-07
	ENSMUSG00000010362	Rdm1	11	+	101627195	101636100	protein_coding	19.5398	17.8789	19.8228	8.91366	10.5957	10.9954	1.87562	1.96652e-08	3.25711e-07
	ENSMUSG00000016933	Plcg1	2	+	160731300	160775760	protein_coding	33.3964	28.7856	33.0979	21.1255	20.7237	19.7368	1.54684	1.98711e-08	3.28874e-07
	ENSMUSG00000070056	Mfhas1	8	+	35587798	35679449	protein_coding	15.3446	14.4658	15.2643	10.5571	10.3988	10.0446	1.45356	1.99145e-08	3.29344e-07
	ENSMUSG00000041132	N4bp2l1	5	-	150571644	150597188	protein_coding	5.38073	5.23836	5.19276	2.30886	2.64588	2.32641	2.16681	2.02799e-08	3.35136e-07
	ENSMUSG00000059674	Cdh24	14	-	54631231	54641364	protein_coding	2.40816	2.82863	3.27407	5.50188	5.0782	5.49235	0.530408	2.05165e-08	3.38791e-07
	ENSMUSG00000019726	Lyst	13	+	13590397	13778803	protein_coding	6.08936	7.22496	6.89213	4.72639	3.32219	4.00113	1.67524	2.10272e-08	3.46964e-07
	ENSMUSG00000021048	Mthfd1	12	+	76255298	76319803	protein_coding	34.8822	34.2071	34.6646	50.0179	48.8658	45.6353	0.717984	2.11051e-08	3.47886e-07
	ENSMUSG00000048852	Gm12185	11	-	48904656	48992226	protein_coding	0.249806	0.237562	0.312094	0.019729	0.07282	0.050421	4.79541	2.11147e-08	3.47886e-07
	ENSMUSG00000008136	Fhl2	1	-	43123074	43196984	protein_coding	67.2259	66.9961	64.6664	45.5648	46.9621	42.6003	1.47176	2.11551e-08	3.48293e-07
	ENSMUSG00000029869	Ephb6	6	+	41605482	41620509	protein_coding	7.9625	8.70192	7.99305	5.47309	5.11131	4.34512	1.65028	2.12392e-08	3.49415e-07
	ENSMUSG00000038291	Snx25	8	-	46033261	46152159	protein_coding	12.0224	12.9282	11.509	17.7174	17.0132	18.233	0.688566	2.13163e-08	3.50421e-07
	ENSMUSG00000035314	Gdpd5	7	+	99381414	99461877	protein_coding	34.7534	31.653	34.1904	25.0963	23.1818	21.8983	1.4333	2.17199e-08	3.5679e-07
	ENSMUSG00000036061	Smug1	15	-	103153290	103167092	protein_coding	3.57049	3.46718	3.26021	6.12321	6.39458	5.80984	0.562593	2.23061e-08	3.66147e-07
[truncated: 17,918 more rows]

## Sheet: Supplementary Table 5
	Supplementary Table 5. The list of upstream regulators of UBA6 dependent genes in 4T1 tumor cells using IPA.
[truncated: 1,589 more rows]

[truncated: 1 more sheets: Supplementary Table 6]
